# Supplementary material for: New knowledge and tools for crystal design: local coordination versus overall network topology and much more
Source: Royal Society of Chemistry journal article supplement (doi:10.1039/c4ce02418d), 2015-01-01
Supplement: c4ce02418d1.xlsx [file c4ce02418d1.xlsx]

## Sheet: Table S1 Data on 811 structures
RefCode	Formula	Name	Authors	Journal	Space Group	Dimension	r	CF	Topological type	Cp	Me	OxS	Cn	CCp	framework number	Class of interpenetration
300	K2(Pt(CN)4)(H2O)3/Distance=2.00A(Set #1)	Dipotassium Tetracyanoplatinate Trihydrate.	Washecheck D.M.,Peterson S.,Reis A.H.jr.,Williams J.M.	Inorganic Chemistry,1976,15,,74-78	Pbcn	0D	4	A*M1)4	1,4M5-1	square	|Pt|	|2|	|4|	|C4|	0
314	K2(Pt(CN)4)Br0.304(H2O)3.2	Potassium Tetracyanoplatinate Bromide Hydrate (2/1/0.3/3.2).	Peters C.,Eagen C.F.	Inorganic Chemistry,1976,15,,782-788	P4mm	0D	4	A*M1)4	1,4M5-1	square	|Pt|	|2|	|4|	|C4|	0
315	K2(Pt(CN)4)Br0.304(H2O)3.22	Potassium Tetracyanoplatinate Bromide Hydrate (2/1/0.3/3.22).	Peters C.,Eagen C.	Inorganic Chemistry,1976,15,,782-788	P4mm	0D	4	A*M1)4	1,4M5-1	square	|Pt|	|2|	|4|	|C4|	0
804	Cs2Li(Cr(CN)6)	Dicesium Lithium Hexacyanochromate(III) - Ht.	Chowdhury M.R.,Wedgwood F.,Chadwick B.M.,Wilde H.	Acta Crystallographica B (24,1968-38,1982),1977,33,,46-52	P4/mnc	3D	3	A*B2)3	pcu alpha-Po primitive cubic; 6/4/c1; sqc1	octahedron	|Cr|	|3|	|6|	|C6|	1	-
851	Ba(Pt(CN)4)(H2O)4/Distance=2.00A(Set #1)	Barium Tetracyanoplatinate Tetrahydrate.	Maffly R.,Johnson P.,Williams J.M.	Acta Crystallographica B (24,1968-38,1982),1977,33,,884-887	C12/c1	0D	4	A*M1)4	1,4M5-1	square	|Pt|	|2|	|4|	|C4|	0
871	K1.75(Pt(CN)4)(H2O)1.5	Potassium Tetracyanoplatinate Hydrate (1.75/1/1.5).	Williams J.M.,Keefer K.D.,Washecheck D.M.,Enright N.	Inorganic Chemistry,1976,15,,2446-2455	P-1	0D	4	A*M1)4	1,4M5-1	square	|Pt|	|2|	|4|	|C4|	0
921	Cs2(Pt(CN)4)(H2O)/Distance=2.00A(Set #1)	Dicesium Tetracyanoplatinate Hydrate.	Johnson P.L.,Koch T.R.,Williams J.M.	Acta Crystallographica B (24,1968-38,1982),1977,33,,1293-1295	P61	0D	4	A*M1)4	1,4M5-1	square	|Pt|	|2|	|4|	|C4|	0
976	Na2(Pt(CN)4)(H2O)3/Distance=2.00A(Set #1)	Disodium Tetracyanoplatinate Trihydrate.	Johnson P.L.,Koch T.R.,Williams J.M.	Acta Crystallographica B (24,1968-38,1982),1977,33,,1976-1979	P-1	0D	4	A*M1)4	1,4M5-1	square	|Pt|	|2|	|4|	|C4|	0
983	Na4(Cr(CN)6)(H2O)10/Distance=2.10A(Set #2)	Tetrasodium Hexacyanochromate(II) Decahydrate.	Ljungstroem E.	Acta Chemica Scandinavica, Series A: (28,1974-),1977,31,,104-108	P121/n1	0D	6	A*M1)6	1,6M7-1	octahedron	|Cr|	|2|	|6|	|C6|	0
1003	Na(Cu(CN)2)(H2O)2/Distance=2.00A(Set #1)	Sodium Dicyanocuprate(I) Dihydrate.	Kappenstein C.,Hugel R.P.	Inorganic Chemistry,1977,16,,250-254	P121/c1	1D	2	A*B2*M1	2C1	triangular	|Cu|	|1|	|3|	|C2N|	1
1009	Rb2(Pt(CN)4)(H2O)1.5/Distance=2.00A(Set #1)	Dirubidium Tetracyanoplatinate Sesquihydrate.	Koch T.R.,Johnson P.L.,Williams J.M.	Inorganic Chemistry,1977,16,,640-645	C12/c1	0D	4	A*M1)4	1,4M5-1	square	|Pt|	|2|	|4|	|C4|	0
1052	Cs2(Pt(CN)4)(H2O)/Distance=2.10A(Set #1)	Cesium Tetracyanoplatinate Hydrate.	Otto H.H.,Schulz H.,Thiemann K.H.,Yersin H.,Gliemann G.	Zeitschrift fuer Naturforschung, Teil B. Anorganische Chemie, Organische Chemie (2,1947-32,1977),1977,32,,127-130	P61	0D	4	A*M1)4	1,4M5-1	square	|Pt|	|2|	|4|	|C4|	0
1175	Rb2(Pt(CN)4)(FHF)0.4	Rubidium Tetracyanoplatinate Hydrogendifluoride (2/1/0.4).	Schultz A.J.,Coffey C.C.,Lee G.C.,Williams J.M.	Inorganic Chemistry,1977,16,,2129-2130	I4/mcm	0D	4	A*M1)4	1,4M5-1	square	|Pt|	|2|	|4|	|C4|	0
1229	KNa(Pt(CN)4)(H2O)3/Distance=2.00A(Set #1)	Potassium Sodium Tetracyanoplatinate Trihydrate.	Johnson P.L.,Musselman R.L.,Williams J.M.	Acta Crystallographica B (24,1968-38,1982),1977,33,,3155-3159	C1c1	0D	4	A*M1)4	1,4M5-1	square	|Pt|	|2|	|4|	|C4|	0
1279	Mn3(Co(CN)6)2(H2O)13	Trimanganese Bis(hexacyanocobaltate) Tridecahydrate.	Beall G.W.,Milligan W.O.,Korp J.D.,Bernal I.	Inorganic Chemistry,1977,16,,2715-2718	Fm-3m	3D	3	A*B2)3	pcu alpha-Po primitive cubic; 6/4/c1; sqc1	octahedron	|Mn|Co|	|2|3|	|6|	|N6|C6|	1
1367	BaCs2(Fe(CN)6)(H2O)2/Distance=1.90A(Set #1)	Barium Dicesium Hexacyanoferrate(II) Dihydrate.	Rafalko J.J.,Swanson B.I.,Beall G.W.	Journal of Solid State Chemistry,1977,21,,195-201	P121/n1	0D	6	A*M1)6	1,6M7-1	octahedron	|Fe|	|2|	|6|	|C6|	0
1538	K2(Pt(CN)4)Cl0.32(H2O)3.34	Potassium Tetracyanoplatinate Chloride Hydrate (2/1/0.32/3.34).	Heger G.,Deiseroth H.J.,Schulz H.	Acta Crystallographica B (24,1968-38,1982),1978,34,,725-731	P4mm	0D	4	A*M1)4	1,4M5-1	square	|Pt|	|2|	|4|	|C4|	0
1539	K2(Pt(CN)4)Br0.26(H2O)3.16/Distance=2.10A(Set #1)	Potassium Tetracyanoplatinate Bromide Hydrate (2/1/0.26/3.16).	Heger G.,Deiseroth H.J.,Schulz H.	Acta Crystallographica B (24,1968-38,1982),1978,34,,725-731	P4mm	0D	4	A*M1)4	1,4M5-1	square	|Pt|	|2|	|4|	|C4|	0
1541	K2(Pt(CN)4)Br0.3(D2O)2.89	Potassium Tetracyanoplatinate Bromide Dideuteriohydrate(2/1/0.3/2.89).	Heger G.,Deiseroth H.J.,Schulz H.	Acta Crystallographica B (24,1968-38,1982),1978,34,,725-731	P4mm	0D	4	A*M1)4	1,4M5-1	square	|Pt|	|2|	|4|	|C4|	0
1542	K2(Pt(CN)4)Br0.32(D2O)2.72	Potassium Tetracyanoplatinate Bromide Dideuteriohydrate(2/1/0.32/2.72).	Heger G.,Deiseroth H.J.,Schulz H.	Acta Crystallographica B (24,1968-38,1982),1978,34,,725-731	P4mm	0D	4	A*M1)4	1,4M5-1	square	|Pt|	|2|	|4|	|C4|	0
1686	Cs2(Pt(CN)4)(FHF)0.39	Cesium Tetracyanoplatinate Hydrogendifluoride (2/1/0.39).	Schultz A.J.,Gerrity D.P.,Williams J.M.	Acta Crystallographica B (24,1968-38,1982),1978,34,,1673-1674	I4/mcm	0D	4	A*M1)4	1,4M5-1	square	|Pt|	|2|	|4|	|C4|	0
2175	Rb2Pt(CN)4Cl0.3(H2O)3	Rubidium Tetracyanoplatinate Chloride Hydrate (2/1/0.3/3).	Williams J.M.,Johnson P.L.,Schultz A.J.,Coffey C.C.	Inorg. Chem.,1978,17,,834-839	P4mm	0D	4	A*M1)4	1,4M5-1	square	|Pt|	|2|	|4|	|C4|	0
2176	(NH4)2Pt(CN)4Cl0.3(H2O)3	Ammonium Tetracyanoplatinate Chloride Hydrate (2/1/0.3/3).	Johnson P.L.,Schultz A.J.,Underhill A.E.,Watkins D.M.,Wood D.J.,Williams J.M.	Inorg. Chem.,1978,17,,839-844	P4mm	0D	4	A*M1)4	1,4M5-1	square	|Pt|	|2|	|4|	|C4|	0
2177	(NH4)2Pt(CN)4Cl0.3(H2O)3	Ammonium Tetracyanoplatinate Chloride Hydrate (2/1/0.3/3).	Johnson P.L.,Schultz A.J.,Underhill A.E.,Watkins D.M.,Wood D.J.,Williams J.M.	Inorg. Chem.,1978,17,,839-844	P4mm	0D	4	A*M1)4	1,4M5-1	square	|Pt|	|2|	|4|	|C4|	0	-
2223	K2Pt(CN)4(FHF)0.3(H2O)3	Potassium Tetracyanoplatinate (hydrogendifluoride) Hydrate(2/1/0.3/3).	Brown R.K.,Johnson P.L.,Lynch T.J.,Williams J.M.	Acta Crystallographica B (24,1968-38,1982),1978,34,,1965-1968	P4mm	0D	4	A*M1)4	1,4M5-1	square	|Pt|	|2|	|4|	|C4|	0
2288	Cs2(Pt(CN)4)Cl0.30	Cesium Tetracyanoplatinate Chloride (2/1/.3).	Brown R.K.,Williams J.M.	Inorg. Chem.,1978,17,,2607-2609	I4/mcm	0D	4	A*M1)4	1,4M5-1	square	|Pt|	|2|	|4|	|C4|	0
2293	K2(Pt(CN)4)Br0.33(H2O)3	Potassium Tetracyanoplatinate Bromide Hydrate (2/1/0.3/3).	Williams J.M.	FERROELECTRICS,1977,16,,135-142	P4mm	0D	4	A*M1)4	1,4M5-1	square	|Pt|	|2|	|4|	|C4|	0
2727	K3(Co(CN)6)	Tripotassium Hexacyanocobaltate(III).	Reynhardt E.C.,Boeyens J.C.A.	Acta Crystallographica B (24,1968-38,1982),1972,28,,524-529	Pnc2	0D	6	A*M1)6	1,6M7-1	octahedron	|Co|	|3|	|6|	|C6|	0	-
2781	(H5O2)(Au(CN)4)	Aquaoxonium Tetracyanoaurate.	Penneman R.A.,Ryan R.R.	Acta Crystallographica B (24,1968-38,1982),1972,28,,1629-1632	P121/c1	0D	4	A*M1)4	1,4M5-1	square	|Au|	|3|	|4|	|C4|	0	-
2815	H3.5(Fe0.5Fe0.5(CN)6)H2O	Hydrogen Hexacyanoferrate Hydrate (3.5/1/1).	Haser R.,Pierrot M.	Acta Crystallographica B (24,1968-38,1982),1972,28,,2538-2542	P-31m	0D	6	A*M1)6	1,6M7-1	octahedron	|Fe|	|2|3|	|6|	|C6|	0	-
2863	H3.6(Fe(CN)6)(H2O)1.6	Hydrogen Hexacyanoferrate(II) Hexacyanoferrate(III) Hydrate(3.6/0.6/0.4/1.6).	Haser R.,Pierrot M.	Acta Crystallographica B (24,1968-38,1982),1972,28,,2542-2547	R-3m	0D	6	A*M1)6	1,6M7-1	octahedron	|Fe|	|2|3|	|6|	|C6|	0	-
2864	H3.33(Fe0.33Fe0.67(CN)6)(H2O)	Hydrogen Hexacyanoferrate Hydrate (3.3/1/1).	Haser R.,Penel C.,Pierrot M.	Acta Crystallographica B (24,1968-38,1982),1972,28,,2548-2554	P121/a1	0D	6	A*M1)6	1,6M7-1	octahedron	|Fe|	|2|3|	|6|	|C6|	0	-
4095	Na2(Pd(CN)4)(H2O)3/Distance=2.10A(Set #1)	Disodium Tetracyanopalladate Trihydrate.	Ledent J.	Bulletin de la Societe Royal des Sciences de Liege,1974,43,,172-189	P-1	0D	4	A*M1)4	1,4M5-1	square	|Pd|	|2|	|4|	|C4|	0
4175	K2(Pt(CN)4)Br0.3(D2O)2.65	Potassium Tetracyanoplatinate(II) Bromide Dideuteriohydrate(2/1/0.3/2.7).	Heger G.,Renker B.,Deiseroth H.J.,Schulz H.,Scheiber G.	Mater. Res. Bull.,1975,10,,217-224	P4mm	0D	4	A*M1)4	1,4M5-1	square	|Pt|	|2|	|4|	|C4|	0
4177	K2(Pt(CN)4)Br0.3(H2O)3	Potassium Tetracyanoplatinate Bromide Hydrate (2/1/0.3/3).	Williams J.M.,Iwata M.,Ross F.K.,Petersen J.L.,Peterson S.W.	Materials Research Bulletin,1975,10,,411-416	P4mm	0D	4	A*M1)4	1,4M5-1	square	|Pt|	|2|	|4|	|C4|	0
4412	Ba(Pt(CN)4)(D2O)4/Distance=2.10A(Set #1)	Barium Tetracyanoplatinate(II) Tetrakis(dideuteriohydrate).	Dupont L.,Dideberg O.,Legrand E.	Bulletin de la Societe Royal des Sciences de Liege,1969,38,,503-508	C12/c1	0D	4	A*M1)4	1,4M5-1	square	|Pt|	|2|	|4|	|C4|	0
4413	Rb2Pt(CN)4(H2O)1.5/Distance=2.40A(Set #3)	Dirubidium Tetracyanoplatinate(II) Sesquihydrate.	Dupont L.	Bulletin de la Societe Royal des Sciences de Liege,1969,38,,509-515	C12/c1	0D	4	A*M1)4	1,4M5-1	square	|Pt|	|2|	|4|	|C4|	0
6083	K4(V(CN)7)(H2O)2/Distance=2.20A(Set #1)	Tetrapotassium Heptacyanovanadate(III) Dihydrate.	Levenson R.A.,Towns R.L.R.	Inorg. Chem.,1974,13,,105-109	I1	0D	7	A*M1)7	1,7M8-1	pentagonal bipyramid	|V|	|3|	|7|	|C7|	0
6084	K3(Cr(CN)6)	Potassium Hexacyanochromate(III).	Jagner S.,Ljungstroem E.,Vannerberg N.G.	Acta Chemica Scandinavica, Series A: (28,1974-),1974,28,,623-630	Pcan	0D	6	A*M1)6	1,6M7-1	octahedron	|Cr|	|3|	|6|	|C6|	0	-
6085	Cs2Li(Cr(CN)6)	Dicesium Lithium Hexacyanochromate(III) - Ht.	Ryan R.R.,Swanson B.I.	Inorg. Chem.,1974,13,,1681-1684	Fm-3m	3D	3	A*B2)3	pcu alpha-Po primitive cubic; 6/4/c1; sqc1	octahedron	|Cr|	|3|	|6|	|C6|	1	-
6086	Cs2MgFe(CN)6	Dicesium Magnesium Hexacyanoferrate(II).	Swanson B.I.,Hamburg S.I.,Ryan R.R.	Inorg. Chem.,1974,13,,1685-1687	Fm-3m	3D	3	A*B2)3	pcu alpha-Po primitive cubic; 6/4/c1; sqc1	octahedron	|Fe|	|2|	|6|	|C6|	1	-
6088	Na4(Mn(CN)6)(H2O)10/Distance=2.00A(Set #1)	Sodium Hexacyanomanganate(II) Decahydrate.	Tullberg A.,Vannerberg N.G.	Acta Chemica Scandinavica, Series A: (28,1974-),1974,28,,551-562	P121/n1	0D	6	A*M1)6	1,6M7-1	octahedron	|Mn|	|2|	|6|	|C6|	0
6093	Cd(Pd(CN)6)	Cadmium Hexacyanopalladate(IV).	Buser H.J.,Ron G.,Ludi A.,Engel P.	Journal of the Chemical Society. Dalton Transactions, Inorganic Chemistry (1972-),1974,1974,,2473-2474	Fm-3m	3D	3	A*B2)3	pcu alpha-Po primitive cubic; 6/4/c1; sqc1	octahedron	|Pd|Cd|	|4|2|	|6|	|C6|N6|	1	-
8248	K2Zn3(Fe(CN)6)2(H2O)5	Dipotassium Trizinc Bis(hexacyanoferrate(II)) Pentahydrate.	Gravereau P.,Garnier E.,Hardy A.M.	Acta Crystallographica B (24,1968-38,1982),1979,35,,2843-2848	R-3cr	3D	2.4	A)5*B2)12	cor/corundum, Al2O3	octahedron & tetrahedron	|Fe|Zn|	|2|	|6|4|	|C6|N4|	1
9032	Cs2LiIr(CN)6	Dicesium Lithium Hexacyanoiridate(III).	Ryan R.R.,Swanson B.I.	Inorg. Chem.,1974,13,,1681-1684	Fm-3m	3D	3	A*B2)3	pcu alpha-Po primitive cubic; 6/4/c1; sqc1	octahedron	|Ir|	|3|	|6|	|C6|	1	-
9035	Na4(Fe(CN)6)(H2O)10/Distance=2.00A(Set #1)	Sodium Hexacyanoferrate(II) Decahydrate.	Tullberg A.,Vannerberg N.G.	Acta Chemica Scandinavica, Series A: (28,1974-),1974,28,,551-562	P121/n1	0D	6	A*M1)6	1,6M7-1	octahedron	|Fe|	|2|	|6|	|C6|	0
9476	Ba3Co2(CN)10(H2O)13/Distance=2.00A(Set #1)	Tribarium Decacyanoduo-dicobaltate(II) 13-hydrate.	Simon G.L.,Adamson A.W.,Dahl L.F.	J. Am. Chem. Soc.,1972,94,,7654-7663	C12/c1	0D	5	A)2*M1)10	1,6M12-1	octahedron	|Co|	|2|	|6|	|C5Co|	0
9477	Ba3Co2(CN)10(H2O)13/Distance=2.00A(Set #1)	Tribarium Decacyanoduo-dicobaltate(II) 13-hydrate.	Brown L.D.,Raymond K.N.,Goldberg S.Z.	J. Am. Chem. Soc.,1972,94,,7664-7674	C12/c1	0D	5	A)2*M1)10	1,6M12-1	octahedron	|Co|	|2|	|6|	|C5Co|	0
10099	Cs2Pt(CN)4(N3)0.25(H2O)0.5	Cesium Tetracyanoplatinate Azide Hydrate (2/1/.3/.5).	Brown R.K.,Vidusek D.A.,Williams J.M.	Inorg. Chem.,1979,18,,801-804	P-4b2	0D	4	A*M1)4	1,4M5-1	square	|Pt|	|2|	|4|	|C4|	0
10180	Cs2LiMn(CN)6	Dicesium Lithium Hexacyanomanganate(III).	Swanson B.I.,Ryan R.R.	Inorg. Chem.,1973,12,,283-286	Fm-3m	3D	3	A*B2)3	pcu alpha-Po primitive cubic; 6/4/c1; sqc1	octahedron	|Mn|	|3|	|6|	|C6|	1	-
10181	Cs2Li(Co(CN)6)	Dicesium Lithium Hexacyanocobaltate.	Swanson B.I.,Ryan R.R.	Inorg. Chem.,1973,12,,283-286	Fm-3m	3D	3	A*B2)3	pcu alpha-Po primitive cubic; 6/4/c1; sqc1	octahedron	|Co|	|3|	|6|	|C6|	1	-
14042	CaK(Co(CN)6)(H2O)2.5	Calcium Potassium Hexacyanocobaltate 2.5-hydrate.	Mys'kiv M.G.,Kryvlyuk L.N.,Gloviak T.,Gladyshevskii E.I.	Koordinatsionnaya Khimiya (= Coordination Chemistry (USSR)),1978,4,,127-133	Pnma	0D	6	A*M1)6	1,6M7-1	octahedron	|Co|	|3|	|6|	|C6|	0
14259	H4W(CN)8(H2O)6	Octacyanotungstic(IV) Acid Hexahydrate.	Basson S.S.,Bok L.D.C.,Leipoldt J.G.	Acta Crystallographica B (24,1968-38,1982),1970,26,,1209-1216	Pmma	0D	8	A*M1)8	1,8M9-1	square antiprism	|W|	|4|	|8|	|C8|	0	-
14368	K2(Zn(CN)4)	Dipotassium Tetracyanozincate.	Sequeira A.,Chidambaram R.	Acta Crystallographica (1,1948-23,1967),1966,20,,910-914	Fd-3m	0D	4	A*M1)4	1,4M5-1	tetrahedron	|Zn|	|2|	|4|	|C4|	0	-
15000	Ca(Ni(CN)4)(H2O)5/Distance=1.90A(Set #1)	Calcium Tetracyanoniccolate Pentahydrate.	Holt E.,Watson K.J.	Acta Chemica Scandinavica (1-27,1973-42,1988),1969,23,,14-28	Pcab	0D	4	A*M1)4	1,4M5-1	square	|Ni|	|2|	|4|	|C4|	0
15002	BaNi(CN)4(H2O)4/Distance=1.90A(Set #1)	Barium Tetracyanoniccolate Tetrahydrate.	Larsen F.K.,Hazell R.G.,Rasmussen S.E.	Acta Chemica Scandinavica (1-27,1973-42,1988),1969,23,,61-69	C12/c1	0D	4	A*M1)4	1,4M5-1	square	|Ni|	|2|	|4|	|C4|	0
15250	K3(Cr(CN)6)	Tripotassium Hexacyanochromate(III) - Lt.	Figgis B.N.,Reynolds P.A.,Williams G.A.	Acta Crystallographica B (24,1968-38,1982),1981,37,,504-508	P-1	0D	6	A*M1)6	1,6M7-1	octahedron	|Cr|	|3|	|6|	|C6|	0	-
15256	Na3Fe(CN)6(H2O)2/Distance=2.00A(Set #1)	Sodium Hexacyanoferrate(III) Dihydrate.	Katila T.,Leskelae M.,Niinisto L.,Riski K.J.,Valkonen J.,Ylae-Jaeaeski J.	J. Solid State Chem.,1980,35,,341-346	C12/m1	0D	6	A*M1)6	1,6M7-1	octahedron	|Fe|	|3|	|6|	|C6|	0
15817	K4(Fe(CN)6)(H2O)3/Distance=2.20A(Set #2)	Tetrapotassium Hexacyanoferrate(II) Trihydrate.	Kiriyama R.,Kiriyama H.,Wada T.,Niizeki N.,Hirabayashi H.	Journal of the Physical Society of Japan,1964,19,,540-549	C12/c1	0D	6	A*M1)6	1,6M7-1	octahedron	|Fe|	|2|	|6|	|C6|	0
16012	Rb2Pd(CN)4H2O/Distance=2.10A(Set #1)	Rubidium Tetracyanopalladate(II) Hydrate.	Dupont L.	Acta Crystallographica B (24,1968-38,1982),1970,26,,964-971	Pncn	0D	4	A*M1)4	1,4M5-1	square	|Pd|	|2|	|4|	|C4|	0
16043	K(Au(CN)4)H2O/Distance=2.00A(Set #1)	Potassium Tetracyanoaurate Hydrate.	Bertinotti C.,Bertinotti A.	Acta Crystallographica B (24,1968-38,1982),1970,26,,422-428	P212121	0D	4	A*M1)4	1,4M5-1	square	|Au|	|3|	|4|	|C4|	0
16053	Na3W(CN)8(H2O)4/Distance=2.20A(Set #1)	Sodium Octacyanotungstate(V) Tetrahydrate.	Bok L.D.C.,Leipoldt J.G.,Basson S.S.	Acta Crystallographica B (24,1968-38,1982),1970,26,,684-692	P121/c1	0D	8	A*M1)8	1,8M9-1	square antiprism	|W|	|5|	|8|	|C8|	0
16224	Rb4(Ni2(CN)6)/Distance=2.90A(Set #3)	Rubidium Hexacyanodiniccolate(I).	Jarchow O.	Z. Anorg. Allg. Chem.,1971,383,,40-48	P-1	0D	3	A)2*M1)6	1,4M8-1	square	|Ni|	|1|	|4|	|C3Ni|	0
16399	CsKNi(CN)4	Cesium Potassium Tetracyanoniccolate.	Musselman R.L.,Stecher L.C.,Watkins S.	Inorg. Chem.,1980,19,,3400-3403	P-1	0D	4	A*M1)4	1,4M5-1	square	|Ni|	|2|	|4|	|C4|	0	-
16458	K5(Nb(CN)8)	Potassium Octacyanoniobate(III).	Hursthouse M.B.,Galas A.M.R.	Journal of the Chemical Society. Chemical Communications (1972-),1980,1980,,1167-1168	I-4	0D	8	A*M1)8	1,8M9-1	trigonal dodecahedron	|Nb|	|3|	|8|	|C8|	0	-
16958	H3(Co(CN)6)	Trihydrogen Hexacyanocobaltate.	Guedel H.U.,Ludi A.,Buerki H.	Helvetica Chimica Acta,1968,51,,1383-1389	P-31m	0D	6	A*M1)6	1,6M7-1	octahedron	|Co|	|3|	|6|	|C6|	0	-
16959	Ag3(Co(CN)6)	Trisilver Hexacyanocobaltate.	Ludi A.,Guedel H.U.	Helvetica Chimica Acta,1968,51,,1762-1765	P-31m	3D	1.5	A)2*B2)3	pcu alpha-Po primitive cubic; 6/4/c1; sqc1	octahedron & linear	|Co|Ag|	|3|1|	|6|2|	|C6|N2|	3	Ia
20747	Au(CN)/Distance=2.10A(Set #1)	Gold Cyanide.	Zhdanov G.S.,Shugam E.A.	Zhurnal Fizicheskoi Khimii,1945,19,,519-522	P6/mmm	1D	1	A*B2	2C1	linear	|Au|	|1|	|2|	|C2|	1
20784	K4(Ru(CN)6)(H2O)3/Distance=2.00A(Set #1)	Potassium Hexacyanoruthenate(II) Trihydrate.	Pospelov V.A.,Zhdanov G.S.	Zhurnal Fizicheskoi Khimii,1947,21,,405-406	C12/c1	0D	6	A*M1)6	1,6M7-1	octahedron	|Ru|	|2|	|6|	|C6|	0
22316	CaPd(CN)4(H2O)5/Distance=2.10A(Set #1)	Calcium Tetracyanopalladate(II) Pentahydrate.	Fontaine F.	Bulletin de la Societe Royal des Sciences de Liege,1968,36,,437-444	Pcab	0D	4	A*M1)4	1,4M5-1	square	|Pd|	|2|	|4|	|C4|	0
22326	K3(V(CN)5(NO))(H2O)2/Distance=2.20A(Set #2)	Potassium Pentacyanonitrosovanadate(I).	Jagner S.,Vannerberg N.G.	Acta Chemica Scandinavica (1-27,1973-42,1988),1970,24,,1988-2002	Pccn	0D	6	A*M1)6	1,6M7-1	octahedron	|V|	|1|	|6|	|C6|	0
23027	Cs2Zn(Fe(CN)6)	Dicesium Zinc Hexacyanoferrate(II).	Kuznetsov V.G.,Maksimova S.I.	Zhurnal Strukturnoi Khimii (Issue-No. from 1981),1973,14,,849-851	P4232	3D	3	A*B2)3	pcu alpha-Po primitive cubic; 6/4/c1; sqc1	trigonal prism	|Fe|Zn|	|2|	|6|	|C6|N6|	1	-
23309	Cs3Mo(CN)8(H2O)2/Distance=2.30A(Set #1)	Cesium Octacyanomolybdate(V) Dihydrate.	Basson S.S.,Leipoldt J.G.,Bok L.D.C.,van Vollenhoven J.S.,Cilliers P.J.	Acta Crystallographica B (24,1968-38,1982),1980,36,,1765-1768	P121/m1	0D	8	A*M1)8	1,8M9-1	square antiprism	|Mo|	|5|	|8|	|C8|	0
23767	K4(Fe(CN)6)(D2O)3/Distance=2.00A(Set #1)	Tetrapotassium Hexacyanoferrate(II) Tris(dideuteriohydrate).	Taylor J.C.,Mueller M.H.,Hitterman R.L.	Acta Crystallographica A (24,1968-38,1982),1970,26,,559-567	A12/a1	0D	6	A*M1)6	1,6M7-1	octahedron	|Fe|	|2|	|6|	|C6|	0
23888	KCu2(CN)3(H2O)/Distance=2.40A(Set #1);Distance=0.00A(Set #1);Distance=0.00A(Set #1);Distance=0.00A(Set #1)	Potassium Dicopper(I) Cyanide Hydrate.	Cromer D.T.,Larson A.C.	Acta Crystallographica (1,1948-23,1967),1962,15,,397-403	P121/c1	2D	1.5	A)2*B2)3	hcb; Shubnikov hexagonal plane net/(6,3)	triangular	|Cu|	|1|	|3|	|C2N|CN2|	1
24099	K2(Ni(CN)4)	Dipotassium Tetracyanoniccolate.	Vannerberg N.G.	Acta Chemica Scandinavica (1-27,1973-42,1988),1964,18,,2385-2391	P121/c1	0D	4	A*M1)4	1,4M5-1	square	|Ni|	|2|	|4|	|C4|	0	-
24933	K3Mn(CN)6	Potassium Hexacyanomanganate(III).	Vannerberg N.G.	Acta Chemica Scandinavica, Series A: (28,1974-),1970,24,,2335-2348	P121/c1	0D	6	A*M1)6	1,6M7-1	octahedron	|Mn|	|3|	|6|	|C6|	0	-
25032	H4W(CN)8(HCl)4(H2O)12/Distance=2.30A(Set #2)	Octacyanotungstic(IV) Acid Tetrakis(hydrogenchloride) Dodecahydrate.	Bok L.D.C.,Leipoldt J.G.,Basson S.S.	Zeitschrift fuer Anorganische und Allgemeine Chemie,1972,392,,303-315	C12/c1	0D	8	A*M1)8	1,8M9-1	square antiprism	|W|	|4|	|8|	|C8|	0
26498	K(Au(CN)2)	Potassium Dicyanoaurate(I).	Rosenzweig A.,Cromer D.T.	Acta Crystallographica (1,1948-23,1967),1959,12,,709-712	R-3	0D	2	A*M1)2	1,2M3-1	linear	|Au|	|1|	|2|	|C2|	0	-
26922	Rb2Pd(CN)4(H2O)	Rubidium Tetracyanopalladate Hydrate.	Dupont L.	Bulletin de la Societe Royal des Sciences de Liege,1967,36,,471-475	Pncn	0D	4	A*M1)4	1,4M5-1	square	|Pd|	|2|	|4|	|C4|	0
26991	K(Au(CN)4)(H2O)/Distance=2.20A(Set #1)	Potassium Tetracyanoaurate Hydrate.	Bertinotti C.,Bertinotti A.	Comptes Rendus Hebdomadaires des Seances de l'Academie des Sciences, Serie B,1968,267,,1227-1229	P212121	0D	4	A*M1)4	1,4M5-1	square	|Au|	|3|	|4|	|C4|	0
27217	Na2Zn3(Fe(CN)6)2(H2O)9/Distance=2.00A(Set #1)	Disodium Trizinc Hexacyanoferrate(II) Nonahydrate.	Garnier E.,Gravereau P.,Hardy A.	Acta Crystallographica B (24,1968-38,1982),1982,38,,1401-1405	R-3c	3D	2.4	A)5*B2)12	cor/corundum, Al2O3	octahedron & tetrahedron	|Fe|Zn|	|2|	|6|4|	|C6|N4|	1
27438	K2(Pt(CN)4)Cl.32(H2O)2.6	Potassium Tetracyanoplatinate Hydrate (2/1/.3/2.6).	Krogmann K.,Hausen H.D.	Z. Anorg. Allg. Chem.,1968,358,,67-81	P4/mmm	0D	4	A*M1)4	1,4M5-1	square	|Pt|	|2|	|4|	|C4|	0
27566	K1.75Pt(CN)4(H2O)1.5	Potassium Tetracyanoplatinate Hydrate *.	Reis A.H.JR.,Peterson S.W.,Washecheck D.M.,Miller J.S.	Inorg. Chem.,1976,15,,2455-2462	P-1	0D	4	A*M1)4	1,4M5-1	square	|Pt|	|2|	|4|	|C4|	0
27770	KNa(Pt(CN)4)(H2O)3/Distance=2.10A(Set #1)	Potassium Sodium Tetracyanoplatinate Trihydrate.	Moreau-Colin M.L.	Bulletin de la Societe Francaise de Mineralogie et de Cristallographie (72,1949-100,1977),1968,91,,332-338	I1c1	0D	4	A*M1)4	1,4M5-1	square	|Pt|	|2|	|4|	|C4|	0
27923	K(Cu(CN)2)	Potassium Dicyanocuprate(I).	Cromer D.T.	Journal of Physical Chemistry,1957,61,,1388-1392	P121/c1	1D	2	A*B2*M1	fes; Shubnikov plane net (4.8^2)	tetrahedron	|Cu|	|1|	|4|	|C3N|	1	-
28032	K4(Ni2(CN)6)	Tetrapotassium Hexacyanodiniccolate(I).	Jarchow O.	Zeitschrift fuer Kristallographie, Kristallgeometrie, Kristallphysik, Kristallchemie (-144,1977),1972,136,,122-134	P-1	0D	3	A)2*M1)6	1,4M8-1	square	|Ni|	|1|	|4|	|C3Ni|	0
28125	K4(Mo(CN)8)(H2O)2/Distance=2.20A(Set #1)	Potassium Octacyanomolybdate(IV) Dihydrate.	Hoard J.L.,Hamor T.A.,Glick M.D.	J. Am. Chem. Soc.,1968,90,,3177-3184	Pnma	0D	8	A*M1)8	1,8M9-1	trigonal dodecahedron	|Mo|	|4|	|8|	|C8|	0
28173	K2Pt(CN)4Cl.3(H2O)3	Potassium Tetracyanoplatinate Chloride Hydrate (2/1/.3/3).	Deiseroth H.J.,Schulz H.	Physical Review Letters,1974,33,,963-965	P4mm	0D	4	A*M1)4	1,4M5-1	square	|Pt|	|2|	|4|	|C4|	0
28174	K2Pt(CN)4Br.3(H2O)3.2	Potassium Tetracyanoplatinate Bromide Hydrate (2/1/.3/3.2).	Peters C.,Eagen C.F.	Physical Review Letters,1975,34,,1132-1134	P4mm	0D	4	A*M1)4	1,4M5-1	square	|Pt|	|2|	|4|	|C4|	0
28497	LiCs2Cr(CN)6	Lithium Dicesium Chromium Cyanide - Iii.	Ryan R.R.,Swanson B.L.	Physical Review, Serie 3. B - Solid State (1,1970-17,1977),1976,13,,5320-5329	P121/n1	3D	3	A*B2)3	pcu alpha-Po primitive cubic; 6/4/c1; sqc1	octahedron	|Cr|	|3|	|6|	|C6|	1	-
28502	H3Co(CN)6	Hydrogen Hexacyanocobaltate.	Pauling L.,Pauling P.	Proceedings of the National Academy of Sciences of the United States of America,1968,60,,362-367	P-31m	0D	6	A*M1)6	1,6M7-1	octahedron	|Co|	|3|	|6|	|C6|	0	-
28653	Cu2(Fe(CN)6)	Dicopper Hexacyanoferrate(II).	Rigamonti R.	Gazzetta Chimica Italiana,1937,67,,137-146	F-43m	3D	3	A*B2)3	pcu alpha-Po primitive cubic; 6/4/c1; sqc1	octahedron	|Fe|Cu|	|2|	|6|	|C6|N6|	1	-
28654	K2Cu(Fe(CN)6)	Dipotassium Copper Hexacyanoferrate(II).	Rigamonti R.	Gazzetta Chimica Italiana,1937,67,,137-146	F-43m	3D	3	A*B2)3	pcu alpha-Po primitive cubic; 6/4/c1; sqc1	octahedron	|Fe|Cu|	|2|	|6|	|C6|N6|	1	-
28655	K2Cu3(Fe(CN)6)2	Dipotassium Tricopper Hexacyanoferrate(II).	Rigamonti R.	Gazzetta Chimica Italiana,1937,67,,137-146	F-43m	3D	3	A*B2)3	pcu alpha-Po primitive cubic; 6/4/c1; sqc1	octahedron	|Fe|Cu|	|2|	|6|	|C6|N6|	1	-
28657	Na2CuFe(CN)6	Disodium Copper Hexacyanoferrate(II).	Rigamonti R.	Gazzetta Chimica Italiana,1937,67,,146-158	F-43m	3D	3	A*B2)3	pcu alpha-Po primitive cubic; 6/4/c1; sqc1	octahedron	|Fe|Cu|	|2|	|6|	|C6|N6|	1	-
28658	(NH4)2CuFe(CN)6	Diammonium Copper Hexacyanoferrate(II).	Rigamonti R.	Gazzetta Chimica Italiana,1937,67,,146-158	F-43m	3D	3	A*B2)3	pcu alpha-Po primitive cubic; 6/4/c1; sqc1	octahedron	|Fe|Cu|	|2|	|6|	|C6|N6|	1	-
28659	Rb2CuFe(CN)6	Dirubidium Copper Hexacyanoferrate(II).	Rigamonti R.	Gazzetta Chimica Italiana,1937,67,,146-158	F-43m	3D	3	A*B2)3	pcu alpha-Po primitive cubic; 6/4/c1; sqc1	octahedron	|Fe|Cu|	|2|	|6|	|C6|N6|	1	-
28667	K2NiFe(CN)6	Dipotassium Nickel Hexacyanoferrate(II).	Rigamonti R.	Gazzetta Chimica Italiana,1938,68,,803-809	F-43m	3D	3	A*B2)3	pcu alpha-Po primitive cubic; 6/4/c1; sqc1	octahedron	|Fe|Ni|	|2|	|6|	|C6|N6|	1	-
28668	Ni2Fe(CN)6	Dinickel Hexacyanoferrate(II).	Rigamonti R.	Gazzetta Chimica Italiana,1938,68,,803-809	F-43m	3D	3	A*B2)3	pcu alpha-Po primitive cubic; 6/4/c1; sqc1	octahedron	|Fe|Ni|	|2|	|6|	|C6|N6|	1	-
28669	K2CoFe(CN)6	Dipotassium Cobalt Hexacyanoferrate(II).	Rigamonti R.	Gazzetta Chimica Italiana,1938,68,,803-809	F-43m	3D	3	A*B2)3	pcu alpha-Po primitive cubic; 6/4/c1; sqc1	octahedron	|Fe|Co|	|2|	|6|	|C6|N6|	1	-
28670	Co2Fe(CN)6	Dicobalt Hexacyanoferrate(II).	Rigamonti R.	Gazzetta Chimica Italiana,1938,68,,803-809	F-43m	3D	3	A*B2)3	pcu alpha-Po primitive cubic; 6/4/c1; sqc1	octahedron	|Fe|Co|	|2|	|6|	|C6|N6|	1	-
30275	K(Ag(CN)2)	Potassium Dicyanoargentate.	Hoard J.L.	Zeitschrift fuer Kristallographie, Kristallgeometrie, Kristallphysik, Kristallchemie (-144,1977),1933,84,,231-255	P-31c	0D	2	A*M1)2	1,2M3-1	linear	|Ag|	|1|	|2|	|C2|	0	-
30513	(NH4)4(Fe(CN)6)(H2O)1.5	Tetraammonium Hexacyanoferrate(II) Sesquihydrate.	Morosin B.	Acta Crystallographica B (24,1968-38,1982),1978,34,,3730-3731	Ia-3d	0D	6	A*M1)6	1,6M7-1	octahedron	|Fe|	|2|	|6|	|C6|	0	-
36070	K3Cu(CN)4	Tripotassium Copper(I) Cyanide.	Roof R.B.JR.,Larson A.C.,Cromer D.T.	Acta Crystallographica B (24,1968-38,1982),1968,24,,269-273	R3c	0D	4	A*M1)4	1,4M5-1	tetrahedron	|Cu|	|1|	|4|	|C4|	0	-
38045	Cs2Zn3(Fe(CN)6)2(H2O)5.52/Distance=2.00A(Set #1)	Dicesium Trizinc Hexacyanoferrate(II) 5.5-hydrate.	Gravereau P.,Garnier E.	Revue de Chimie Minerale,1983,20,,68-77	R-3c	3D	2.4	A)5*B2)12	cor/corundum, Al2O3	octahedron & tetrahedron	|Fe|Zn|	|2|	|6|4|	|C6|N4|	1
41197	Co(Au(CN)2)2	Cobalt Dicyanoaurate(I).	Abrahams S.C.,Zyontz L.E.,Bernstein J.L.	Journal of Chemical Physics,1982,76,,5458-5462	P6422	3D	1.33	A)3*B2)4	qtz Quartz; 4/6/h1	tetrahedron & linear	|Co|Au|	|2|1|	|4|2|	|N4|C2|	6	IIIa
44400	Mn3(Co(CN)6)2(H2O)12	Trimanganese Bis(hexacyanocobaltate(III)) Dodecahydrate.	Ferrari A.,Tani M.E.,Manano G.	Gazzetta Chimica Italiana,1959,89,,2512-2525	F-43m	3D	3	A*B2)3	pcu alpha-Po primitive cubic; 6/4/c1; sqc1	octahedron	|Mn|Co|	|2|3|	|6|	|N6|C6|	1
44401	Fe3(Co(CN)6)2(H2O)12	Triiron Bis(hexacyanocobaltate(III)) Dodecahydrate.	Ferrari A.,Tani M.E.,Manano G.	Gazzetta Chimica Italiana,1959,89,,2512-2525	F-43m	3D	3	A*B2)3	pcu alpha-Po primitive cubic; 6/4/c1; sqc1	octahedron	|Fe|Co|	|2|3|	|6|	|N6|C6|	1
44402	Co3(Co(CN)6)2(H2O)12	Tricobalt Bis(hexacyanocobaltate) Dodecahydrate.	Ferrari A.,Tani M.E.,Manano G.	Gazzetta Chimica Italiana,1959,89,,2512-2525	F-43m	3D	3	A*B2)3	pcu alpha-Po primitive cubic; 6/4/c1; sqc1	octahedron	|Co|	|3|2|	|6|	|C6|N6|	1
44403	Ni3(Co(CN)6)2(H2O)12	Trinickel Bis(hexacyanocobaltate) Dodecahydrate.	Ferrari A.,Tani M.E.,Manano G.	Gazzetta Chimica Italiana,1959,89,,2512-2525	F-43m	3D	3	A*B2)3	pcu alpha-Po primitive cubic; 6/4/c1; sqc1	octahedron	|Co|Ni|	|3|2|	|6|	|C6|N6|	1
44404	Zn3(Co(CN)6)2(H2O)12	Trizinc Bis(hexacyanocobaltate) Dodecahydrate.	Ferrari A.,Tani M.E.,Manano G.	Gazzetta Chimica Italiana,1959,89,,2512-2525	F-43m	3D	3	A*B2)3	pcu alpha-Po primitive cubic; 6/4/c1; sqc1	octahedron	|Co|Zn|	|3|2|	|6|	|C6|N6|	1
44405	Cd3(Co(CN)6)2(H2O)12	Tricadmium Bis(hexacyanocobaltate) Dodecahydrate.	Ferrari A.,Tani M.E.,Manano G.	Gazzetta Chimica Italiana,1959,89,,2512-2525	F-43m	3D	3	A*B2)3	pcu alpha-Po primitive cubic; 6/4/c1; sqc1	octahedron	|Co|Cd|	|3|2|	|6|	|C6|N6|	1
45114	Mn3(Co(CN)6)2	Trimanganese Bis(hexacyanocobaltate).	Vaciago A.,Mugnoli A.,Cambi L.	Atti della Accademia Nazionale dei Lincei, Classe di Scienze Fisiche, Matematiche e Naturali, Rendiconti, Serie 8 (1, 1946-),1959,26,,517-522	Fm-3m	3D	3	A*B2)3	pcu alpha-Po primitive cubic; 6/4/c1; sqc1	octahedron	|Mn|Co|	|2|3|	|6|	|N6|C6|	1	-
45154	Co3(Co(CN)6)2	Cobalt Hexacyanocobaltate.	Vaciago A.,Mugnoli A.	Atti della Accademia Nazionale dei Lincei, Classe di Scienze Fisiche, Matematiche e Naturali, Rendiconti, Serie 8 (1, 1946-),1958,25,,531-537	Fm-3m	3D	3	A*B2)3	pcu alpha-Po primitive cubic; 6/4/c1; sqc1	octahedron	|Co|	|2|3|	|6|	|C6|N6|	1	-
45540	Mn3(Rh(CN)6)2(H2O)12	Trimanganese Bis(hexacyanorhodate(III)) Dodecahydrate.	Ferrari A.,Tani M.E.	Gazzetta Chimica Italiana,1960,90,,1565-1573	F-43m	3D	3	A*B2)3	pcu alpha-Po primitive cubic; 6/4/c1; sqc1	octahedron	|Mn|Rh|	|2|3|	|6|	|N6|C6|	1
45541	Fe3(Rh(CN)6)2(H2O)12	Triiron Bis(hexacyanorhodate(III)) Dodecahydrate.	Ferrari A.,Tani M.E.	Gazzetta Chimica Italiana,1960,90,,1565-1573	F-43m	3D	3	A*B2)3	pcu alpha-Po primitive cubic; 6/4/c1; sqc1	octahedron	|Fe|Rh|	|2|3|	|6|	|N6|C6|	1
45542	Co3(Rh(CN)6)2(H2O)12	Tricobalt Bis(hexacyanorhodate(III)) Dodecahydrate.	Ferrari A.,Tani M.E.	Gazzetta Chimica Italiana,1960,90,,1565-1573	F-43m	3D	3	A*B2)3	pcu alpha-Po primitive cubic; 6/4/c1; sqc1	octahedron	|Co|Rh|	|2|3|	|6|	|N6|C6|	1
45543	Ni3(Rh(CN)6)2(H2O)12	Trinickel Bis(hexacyanorhodate(III)) Dodecahydrate.	Ferrari A.,Tani M.E.	Gazzetta Chimica Italiana,1960,90,,1565-1573	F-43m	3D	3	A*B2)3	pcu alpha-Po primitive cubic; 6/4/c1; sqc1	octahedron	|Ni|Rh|	|2|3|	|6|	|N6|C6|	1
45544	Cu3(Rh(CN)6)2(H2O)12	Tricopper Bis(hexacyanorhodate(III)) Dodecahydrate.	Ferrari A.,Tani M.E.	Gazzetta Chimica Italiana,1960,90,,1565-1573	F-43m	3D	3	A*B2)3	pcu alpha-Po primitive cubic; 6/4/c1; sqc1	octahedron	|Cu|Rh|	|2|3|	|6|	|N6|C6|	1
45545	Zn3(Rh(CN)6)2(H2O)12	Trizinc Bis(hexacyanorhodate(III)) Dodecahydrate.	Ferrari A.,Tani M.E.	Gazzetta Chimica Italiana,1960,90,,1565-1573	F-43m	3D	3	A*B2)3	pcu alpha-Po primitive cubic; 6/4/c1; sqc1	octahedron	|Zn|Rh|	|2|3|	|6|	|N6|C6|	1
45546	Cd3(Rh(CN)6)2(H2O)12	Tricadmium Bis(hexacyanorhodate(III)) Dodecahydrate.	Ferrari A.,Tani M.E.	Gazzetta Chimica Italiana,1960,90,,1565-1573	F-43m	3D	3	A*B2)3	pcu alpha-Po primitive cubic; 6/4/c1; sqc1	octahedron	|Rh|Cd|	|3|2|	|6|	|C6|N6|	1
51493	Pb2(Fe(CN)6)	Dilead Hexacyanoferrate(II).	Zubkov V.G.,Tyutyunnik A.P.,Berger I.F.,Maksimova L.G.,Denisova T.A.,Polyakov E.V.,Kaplan I.G.,Voronin V.I.	SOLID STATE SCIENCES,2001,3,3,361-367	P-3	3D	2	A*B3)2	3,6,6T20	octahedron	|Fe|	|2|	|6|	|C6|	1	-
51494	Sn2(Fe(CN)6)	Ditin Hexacyanoferrate(II).	Zubkov V.G.,Tyutyunnik A.P.,Berger I.F.,Maksimova L.G.,Denisova T.A.,Polyakov E.V.,Kaplan I.G.,Voronin V.I.	Solid State Sci.,2001,3,,361-367	P-3	2D	2	A*B2)2	kgd; Shubnikov plane net (3.6.3.6)/dual	octahedron & triangular	|Fe|Sn|	|2|	|6|3|	|C6|N3|	1	-
53268	K3(Co(CN)6)	Tripotassium Hexacyanocobaltate.	Reynhardt E.C.,Boeyens J.C.A.	Acta Crystallographica B (24,1968-38,1982),1972,28,,524-529	Pnca	0D	6	A*M1)6	1,6M7-1	octahedron	|Co|	|3|	|6|	|C6|	0	-
54145	CsMn(Cr(CN)6)(D2O)	Cesium Manganese Hexacyanochromate(III) Dideuteriohydrate.	Ziegler B.,Witzel M.,Schwarten M.,Babel D.	Z. Naturforsch., B: Chem. Sci.,1999,54,,870-876	F-43m	3D	3	A*B2)3	pcu alpha-Po primitive cubic; 6/4/c1; sqc1	octahedron	|Cr|Mn|	|3|2|	|6|	|C6|N6|	1
56222	In(CN)3	Indium Cyanide.	Williams D.,Kouvetakis J.,O'Keeffe M.	Inorg. Chem.,1998,37,,4617-4620	Pm-3m	3D	3	A*B2)3	pcu alpha-Po primitive cubic; 6/4/c1; sqc1	octahedron	|In|	|3|	|6|	|C6|	1	-
56327	K3(Cr(CN)6)	Tripotassium Hexacyanochromate(III) - Lt.	Figgis B.N.,Reynolds P.A.,Williams G.A.	Acta Crystallographica B (24,1968-38,1982),1981,37,,504-508	P1121/n	0D	6	A*M1)6	1,6M7-1	octahedron	|Cr|	|3|	|6|	|C6|	0	-
56602	CsMn(Cr(CN)6)	Cesium Manganese Hexacyanochromate(III).	Eyert V.,Siberchicot B.,Verdaguer M.	Phys. Rev. B: Condens. Matter Mater. Phys.,1997,56,,8959-8969	F-43m	3D	3	A*B2)3	pcu alpha-Po primitive cubic; 6/4/c1; sqc1	octahedron	|Cr|Mn|	|3|2|	|6|	|C6|N6|	1	-
56603	CsNi(Cr(CN)6)	Cesium Nickel Hexacyanochromate(III).	Eyert V.,Siberchicot B.,Verdaguer M.	Phys. Rev. B: Condens. Matter Mater. Phys.,1997,56,,8959-8969	F-43m	3D	3	A*B2)3	pcu alpha-Po primitive cubic; 6/4/c1; sqc1	octahedron	|Cr|Ni|	|3|2|	|6|	|C6|N6|	1	-
59389	Na4(Fe(CN)6)(H2O)10/Distance=2.00A(Set #1)	Tetrasodium Hexacyanoferrate(II) Decahydrate.	Longridge J.J.,Rawson J.M.,Davies J.E.	Acta Crystallographica C (39,1983-),1998,54,7,1-1	P121/n1	0D	6	A*M1)6	1,6M7-1	octahedron	|Fe|	|2|	|6|	|C6|	0
59394	K3(Co(CN)6)	Tripotassium Hexacyanocobaltate.	Zhou P.,Xue F.,Au-Yeung S.C.F.	Acta Crystallogr., Sect. C: Cryst. Struct. Commun.,1998,54,,1-1	P121/c1	0D	6	A*M1)6	1,6M7-1	octahedron	|Co|	|3|	|6|	|C6|	0	-
59726	K2Na(Ag(CN)2)3	Dipotassium Sodium Tris(dicyanoargentate).	Fischer P.,Lucas B.,Omary M.A.,Larochelle C.L.,Patterson H.H.	J. Solid State Chem.,2002,168,,267-274	C12/m1	0D	2	A*M1)2	1,2M3-1	linear	|Ag|	|1|	|2|	|C2|	0	-
59917	K2Na(Co(CN)6)	Dipotassium Sodium Hexacyanocobaltate(III).	Ilyukhin A.B.,Kotova I.YU.	Acta Crystallogr., Sect. E: Struct. Rep. Online,2005,61,,i26-i27	P121/n1	0D	6	A*M1)6	1,6M7-1	octahedron	|Co|	|3|	|6|	|C6|	0	-
60008	Cs2Na(Au(CN)2)3	Dicesium Sodium Tris(dicyanoaurate).	Blom N.,Ludi A.,Buergi H.B.	Acta Crystallogr., Sect. C: Cryst. Struct. Commun.,1984,40,,1770-1772	P63/mmc	0D	2	A*M1)2	1,2M3-1	linear	|Au|	|1|	|2|	|C2|	0	-
60535	K3(Fe(CN)6)	Tripotassium Hexacyanoferrate(III).	Morioka Y.,Toriumi K.,Ito T.,Saito A.,Nakagawa I.	J. Phys. Soc. Jpn.,1985,54,,2184-2189	P121/c1	0D	6	A*M1)6	1,6M7-1	octahedron	|Fe|	|3|	|6|	|C6|	0	-
60536	K3(Fe(CN)6)	Tripotassium Hexacyanoferrate(III) - Lt.	Morioka Y.,Toriumi K.,Ito T.,Saito A.,Nakagawa I.	Journal of the Physical Society of Japan,1985,54,,2184-2189	P121/n1	0D	6	A*M1)6	1,6M7-1	octahedron	|Fe|	|3|	|6|	|C6|	0	-
60541	Cs2LiFe(CN)6	Dicesium Lithium Hexacyanoferrate(III).	Chadwick B.M.,Jones D.W.,Wilde H.J.,Yerkess J.	Journal of Crystallographic and Spectroscopic Research,1985,15,,133-146	Fm-3m	3D	3	A*B2)3	pcu alpha-Po primitive cubic; 6/4/c1; sqc1	octahedron	|Fe|	|3|	|6|	|C6|	1	-
61098	Ca(Ag(CN)2)2(H2O)2/Distance=0.00A(Set #1);Distance=0.00A(Set #1);Distance=2.40A(Set #1);Distance=0.00A(Set #1)	Calcium Bis(dicyanoargentate) Dihydrate.	Range K.J.,Zabel M.,Meyer H.,Fischer H.	Zeitschrift fuer Naturforschung, Teil B. Anorganische Chemie, Organische Chemie (33,1978-41,1986),1985,40,,1618-1621	Pbcm	0D	2	A*M1)2	1,2M3-1	linear	|Ag|	|1|	|2|	|C2|	0
61099	Sr(Ag(CN)2)2(H2O)2/Distance=0.00A(Set #1);Distance=0.00A(Set #1);Distance=2.40A(Set #1);Distance=0.00A(Set #1)	Strontium Dicyanoargentate Dihydrate.	Range K.J.,Zabel M.,Meyer H.,Fischer H.	Zeitschrift fuer Naturforschung, Teil B. Anorganische Chemie, Organische Chemie (33,1978-41,1986),1985,40,,1618-1621	Pbcm	0D	2	A*M1)2	1,2M3-1	linear	|Ag|	|1|	|2|	|C2|	0
62084	K2(Hg(CN)4)	Dipotassium Tetracyanomercurate.	Gerlach P.N.,Powell B.M.	Journal of Chemical Physics,1986,85,,6004-6009	Fd-3m	0D	4	A*M1)4	1,4M5-1	tetrahedron	|Hg|	|2|	|4|	|C4|	0	-
62085	K2(Hg(CN)4)	Dipotassium Tetracyanomercurate - Lt.	Gerlach P.N.,Powell B.M.	Journal of Chemical Physics,1986,85,,6004-6009	R-3cr	0D	4	A*M1)4	1,4M5-1	tetrahedron	|Hg|	|2|	|4|	|C4|	0	-
62541	Cs2K(Cr(CN)6)	Dicesium Potassium Hexacyanochromate(III).	Figgis B.N.,Reynolds P.A.	Journal of the Chemical Society. Dalton Transactions, Inorganic Chemistry (1972-),1987,1987,,1747-1753	P121/n1	0D	6	A*M1)6	1,6M7-1	octahedron	|Cr|	|3|	|6|	|C6|	0	-
65697	Na(Ag(CN)2)	Sodium Dicyanoargentate.	Range K.J.,Kuehnel S.,Zabel M.	Acta Crystallogr., Sect. C: Cryst. Struct. Commun.,1989,45,,1419-1420	C12/c1	0D	2	A*M1)2	1,2M3-1	linear	|Ag|	|1|	|2|	|C2|	0	-
65699	K2Na(Ag(CN)2)3	Dipotassium Sodium Phyllo-dicyanoargentate.	Zabel M.,Kuehnel S.,Range K.J.	Acta Crystallogr., Sect. C: Cryst. Struct. Commun.,1989,45,,1619-1621	P-31m	0D	2	A*M1)2	1,2M3-1	linear	|Ag|	|1|	|2|	|C2|	0	-
66037	Rb(Au(CN)2)	Rubidium Phyllo-dicyanoaurate(I).	Schubert R.J.,Range K.J.	Z. Naturforsch., B: Chem. Sci.,1990,45,,629-634	C12/c1	0D	2	A*M1)2	1,2M3-1	linear	|Au|	|1|	|2|	|C2|	0	-
66937	Zn(CN)2	Zinc Cyanide.	Hoskins B.F.,Robson R.	J. Am. Chem. Soc.,1990,112,,1546-1554	P-43m	3D	2	A*B2)2	dia Diamond; 4/6/c1; sqc6	tetrahedron	|Zn|	|2|	|4|	|C4|N4|	2	Ia
66938	Cd(CN)2	Cadmium Zyanide.	Hoskins B.F.,Robson R.	J. Am. Chem. Soc.,1990,112,,1546-1554	P-43m	3D	2	A*B2)2	dia Diamond; 4/6/c1; sqc6	tetrahedron	|Cd|	|2|	|4|	|C4|N4|	2	Ia
67255	Cs2NaMn(CN)6/Distance=2.00A(Set #1)	Dicesium Sodium Hexacyanomanganate(III).	Ziegler B.,Haegele R.,Babel D.	Z. Naturforsch., B: Chem. Sci.,1989,44,,896-902	P121/n1	0D	6	A*M1)6	1,6M7-1	octahedron	|Mn|	|3|	|6|	|C6|	0
68301	Tl2(Zn(CN)4)	Dithallium Tetracyanozincate.	Wiehl L.,Kluefers P.,Schweiss B.P.,Fuess H.	Z. Kristallogr.,1988,184,,281-288	F-43c	0D	4	A*M1)4	1,4M5-1	tetrahedron	|Zn|	|2|	|4|	|C4|	0	-
70003	Na2(Pt(CN)4)(H2O)3/Distance=2.00A(Set #1)	Disodium Tetracyanoplatinate Trihydrate.	Johnson P.L.,Koch T.R.,Williams J.M.	Acta Crystallographica B (24,1968-38,1982),1977,33,,1976-1979	P-1	0D	4	A*M1)4	1,4M5-1	square	|Pt|	|2|	|4|	|C4|	0
71612	Tl4(Mo(CN)8)	Tetrathallium Octacyanomolybdate(IV).	Meske W.,Babel D.	J. Alloys Compd.,1992,183,,158-167	C12/c1	0D	8	A*M1)8	1,8M9-1	square antiprism	|Mo|	|4|	|8|	|C8|	0	-
73099	Tl4(Fe(CN)6)	Thallium Hexacyanoferrate(II).	Koerner T.,Sabrowsky H.	Zeitschrift fuer Anorganische und Allgemeine Chemie,1993,619,,1231-1236	P-1	0D	6	A*M1)6	1,6M7-1	octahedron	|Fe|	|2|	|6|	|C6|	0	-
73283	Rb(Ag(CN)2)(H2O)0.4/Distance=0.00A(Set #1);Distance=0.00A(Set #1);Distance=2.40A(Set #1);Distance=0.00A(Set #1)	Rubidium Dicyanoargentate Hydrate (1/1/.4).	Kuehnel S.,Range K.J.	Z. Naturforsch., B: Chem. Sci.,1993,48,,133-139	Cmc21	0D	2	A*M1)2	1,2M3-1	linear	|Ag|	|1|	|2|	|C2|	0
74061	((H2O)11(H3O)3)(CdCu2(CN)7)/Distance=2.40A(Set #2)	Undecaaquatrioxonium Heptacyanodicuprato(I)cadmate.	Nishikiori S.I.,Iwamoto T.	Journal of the Chemical Society. Chemical Communications (1972-),1993,1993,,1555-1556	Pa-3	3D	2.33	A)3*B2)7	fsn	octahedron & tetrahedron	|Cu|Cd|	|1|2|	|4|6|	|C4|N6|	1
75503	Rb(Cd(Ag(CN)2)3)	Rubidium Tris(dicyanoargentato)cadmate.	Hoskins B.F.,Robson R.,Scarlett N.V.Y.	Journal of the Chemical Society. Chemical Communications (1972-),1994,1994,,2025-2026	P312	3D	1.5	A)2*B2)3	pcu alpha-Po primitive cubic; 6/4/c1; sqc1	octahedron & linear	|Ag|Cd|	|1|2|	|2|6|	|C2|N6|	3	Ia
76973	K4Fe(CN)6(H2O)3/Distance=2.00A(Set #1)	Potassium Hyxacyanoferrate(II) Trihydrate.	Pospelov V.A.,Zhdanov G.S.	Zhurnal Fizicheskoi Khimii,1947,21,,405-406	C12/c1	0D	6	A*M1)6	1,6M7-1	octahedron	|Fe|	|2|	|6|	|C6|	0
77321	Li(CN)	Lithium Cyanide.	Lely J.A.,Bijvoet J.M.	Recueil des Travaux Chimiques des Pays-Bas et de la Belgique,1942,61,,244-252	Pnma	3D	1	A*B4	sra SrAl2 CeCu2 ABW; 4/4/o1	tetrahedron	|Li|	|1|	|4|	|CN3|	1	-
77338	NaK(Pt(CN)4)(H2O)3/Distance=2.00A(Set #1)	Sodium Potassium Tetracyanoplatinate Trihydrate.	Montfort F.	Bulletin de la Societe Chimique de Belgique,1942,11,,567-580	I12/m1	0D	4	A*M1)4	1,4M5-1	square	|Pt|	|2|	|4|	|C4|	0
77339	Cd3(Fe(CN)6)2	Tricadmium Bis(hexacyanoferrate(III)).	Weiser H.B.,Milligan W.O.,Bates J.B.	Journal of Physical Chemistry,1942,46,,99-111	Fm-3m	3D	3	A*B2)3	pcu alpha-Po primitive cubic; 6/4/c1; sqc1	octahedron	|Fe|Cd|	|3|2|	|6|	|C6|N6|	1	-
77340	Fe1.33(Fe(CN)6)	Iron(III) Hexacyanoferrate(II) (1.33/1).	Weiser H.B.,Milligan W.O.,Bates J.B.	Journal of Physical Chemistry,1942,46,,99-111	Fm-3m	3D	3	A*B2)3	pcu alpha-Po primitive cubic; 6/4/c1; sqc1	octahedron	|Fe|	|2|3|	|6|	|C6|N6|	1	-
77380	Na2(Ni(CN)4)(H2O)3/Distance=2.00A(Set #1)	Disodium Tetracyanoniccolate Trihydrate.	Brasseur H.,de Rassenfosse A.	Mem. Soc. Sci. Liege,1941,4,,397-458	P-1	0D	4	A*M1)4	1,4M5-1	square	|Ni|	|2|	|4|	|C4|	0
77916	Cu3(Fe(CN)6)2(H2O)2	Tricopper Bis(hexacyanoferrate(III)) Dihydrate.	Van BEVER A.K.	Recueil des Travaux Chimiques des Pays-Bas et de la Belgique,1938,57,,1259-1268	Fm-3m	3D	3	A*B2)3	pcu alpha-Po primitive cubic; 6/4/c1; sqc1	octahedron	|Fe|Cu|	|3|2|	|6|	|C6|N6|	1
78447	Ni3(Fe(CN)6)2(H2O)	Trinickel Bis(hexacyanoferrate(III)) Hydrate.	Juszczyk S.,Johansson C.,Hanson M.,Ratuszna A.,Malecki G.	J. Phys.: Condens. Matter,1994,6,,5697-5706	F-43m	3D	3	A*B2)3	pcu alpha-Po primitive cubic; 6/4/c1; sqc1	octahedron	|Fe|Ni|	|3|2|	|6|	|C6|N6|	1
78448	Co3(Fe(CN)6)2(H2O)	Cobalt Bis(hexacyanoferrate(III)) Hydrate.	Juszczyk S.,Johansson C.,Hanson M.,Ratuszna A.,Malecki G.	J. Phys.: Condens. Matter,1994,6,,5697-5706	F-43m	3D	3	A*B2)3	pcu alpha-Po primitive cubic; 6/4/c1; sqc1	octahedron	|Fe|Co|	|3|2|	|6|	|C6|N6|	1
79722	Cs6Cl3(Fe(CN)6)(H2O)/Distance=2.00A(Set #1)	Hexacesium Trichloride Hexacyanoferrate(III) Hydrate.	Capparelli M.V.,Murgich J.	Acta Crystallogr., Sect. C: Cryst. Struct. Commun.,1995,51,,356-358	Pnma	0D	6	A*M1)6	1,6M7-1	octahedron	|Fe|	|3|	|6|	|C6|	0
81197	Cu1.7(Fe(CN)6)(H2O)0.55	Copper Hexacyanoferrate(II) Hydrate (1.7/1/0.55).	Ratuszna A.,Juszczyk S.,Malecki G.	Powder Diffraction,1995,10,,300-305	F-43m	3D	3	A*B2)3	pcu alpha-Po primitive cubic; 6/4/c1; sqc1	octahedron	|Fe|Cu|	|2|	|6|	|C6|N6|	1	-
81198	Ni1.81(Fe(CN)6)(H2O)0.54	Nickel Hexacyanoferrate(II) Hydrate (1.81/1/0.54).	Ratuszna A.,Juszczyk S.,Malecki G.	Powder Diffraction,1995,10,,300-305	F-43m	3D	3	A*B2)3	pcu alpha-Po primitive cubic; 6/4/c1; sqc1	octahedron	|Fe|Ni|	|2|	|6|	|C6|N6|	1	-
81210	Na2Cu(Fe(CN)6)(H2O)10/Distance=2.00A(Set #1)	Disodium Copper Hexacyanoferrate(II) Decahydrate.	Ayrault S.,Loos-Neskovic C.,Fedoroff M.,Garnier E.,Jones D.J.	Talanta,1995,42,,1581-1593	P12/m1	2D	3	A*B2)2*M1	sql/Shubnikov tetragonal plane net	octahedron & square	|Fe|Cu|	|2|	|6|4|	|C6|N4|	1
83392	Rb2Li(Fe(CN)6)	Dirubidium Lithium Hexacyanoferrate(III).	Peschel S.,Paulus W.,Babel D.	Z. Naturforsch., B: Chem. Sci.,1996,51,,826-831	P121/n1	3D	3	A*B2)3	pcu alpha-Po primitive cubic; 6/4/c1; sqc1	octahedron	|Fe|	|3|	|6|	|C6|	1	-
83393	Rb2Li(Co(CN)6)	Dirubidium Lithium Hexacyanocobaltate(III).	Peschel S.,Paulus W.,Babel D.	Z. Naturforsch., B: Chem. Sci.,1996,51,,826-831	P121/n1	3D	3	A*B2)3	pcu alpha-Po primitive cubic; 6/4/c1; sqc1	octahedron	|Co|	|3|	|6|	|C6|	1	-
83394	Rb2Na(Fe(CN)6)	Dirubidium Sodium Hexacyanoferrate(III).	Peschel S.,Paulus W.,Babel D.	Z. Naturforsch., B: Chem. Sci.,1996,51,,826-831	P121/n1	0D	6	A*M1)6	1,6M7-1	octahedron	|Fe|	|3|	|6|	|C6|	0	-
83396	Rb2Na(Co(CN)6)	Dirubidium Sodium Hexacyanocobaltate.	Peschel S.,Paulus W.,Babel D.	Z. Naturforsch., B: Chem. Sci.,1996,51,,826-831	P121/n1	0D	6	A*M1)6	1,6M7-1	octahedron	|Co|	|3|	|6|	|C6|	0	-
83416	(NH4)(Cu2(CN)3)(H2O)	Ammonium Tricyanodicuprate(I) Hydrate.	Mykhalichko B.M.,Mys'Kiv M.G.,Aksel'Rud L.G.	Zhurnal Neorganicheskoi Khimii,1996,41,,75-78	P121/c1	2D	1.5	A)2*B2)3	hcb; Shubnikov hexagonal plane net/(6,3)	triangular	|Cu|	|1|	|3|	|CN2|C2N|	1	-
84969	Ga(CN)3	Gallium Cyanide.	Williams D.J.,Partin D.E.,Lincoln F.J.,Kouvetakis J.,O'Keeffe M.	Journal of Solid State Chemistry,1997,134,,164-169	Pm-3m	3D	3	A*B2)3	pcu alpha-Po primitive cubic; 6/4/c1; sqc1	octahedron	|Ga|	|3|	|6|	|C6|	1	-
85757	Tl(Ag(CN)2)	Thallium Dicyanorgentate.	Omary M.A.,Webb T.R.,Assefa Z.,Shankle G.E.,Patterson H.	Inorg. Chem.,1998,37,,1380-1386	P121/c1	0D	2	A*M1)2	1,2M3-1	linear	|Ag|	|1|	|2|	|C2|	0	-
85782	Au(CN)	Gold Cyanide.	Bowmaker G.A.,Kennedy B.J.,Reid J.C.	Inorganic Chemistry,1998,37,,3968-3974	P6mm	1D	1	A*B2	2C1	linear	|Au|	|1|	|2|	|CN|	0	-
85783	Ag(CN)	Silver Cyanide.	Bowmaker G.A.,Kennedy B.J.,Reid J.C.	Inorg. Chem.,1998,37,,3968-3974	R3m	1D	1	A*B2	2C1	linear	|Ag|	|1|	|2|	|CN|	0	-
87573	K4(W(CN)8)(H2O)2/Distance=2.20A(Set #1)	Tetrapotassium Octacyanotungstate(IV) Dihydrate.	Saramaga I.V.,Dovgei V.V.,Yarovets V.Ya.,Chernyak B.I.	Ukrains'kii Khimicheskii Zhurnal (Russian Edition),1998,64,,34-39	Pnma	0D	8	A*M1)8	1,8M9-1	trigonal dodecahedron	|W|	|4|	|8|	|C8|	0
87574	Na3(H3O)(W(CN)8)(H2O)4/Distance=2.20A(Set #1)	Trisodium Oxonium Octacyanotungstate(IV) Tetrahydrate.	Saramaga I.V.,Dovgei V.V.	Ukr. Khim. Zh. (Russ. Ed.),1998,64,,87-92	P1121/n	0D	8	A*M1)8	1,8M9-1	square antiprism	|W|	|4|	|8|	|C8|	0
89338	KNi(Fe(CN)6)	Potassium Nickel Hexacyanoferrate(III).	Malecki G.,Ratuszna A.	Powder Diffraction,1999,14,1,25-30	Fm-3m	3D	3	A*B2)3	pcu alpha-Po primitive cubic; 6/4/c1; sqc1	octahedron	|Fe|Ni|	|3|2|	|6|	|C6|N6|	1	-
89339	KMn(Fe(CN)6)(H2O)/Distance=2.40A(Set #2)	Potassium Manganese Hexacyanoferrate(III) Hydrate.	Malecki G.,Ratuszna A.	Powder Diffraction,1999,14,,25-30	P121/c1	3D	3	A*B2)3	pcu alpha-Po primitive cubic; 6/4/c1; sqc1	octahedron	|Mn|Fe|	|2|3|	|6|	|N6|C6|	1
91841	Mn3(Fe(CN)6)2(H2O)2	Trimanganese Bis(hexacyanoferrate(III)) Dihydrate.	Ratuszna A.,Malecki G.	MATERIALS SCIENCE FORUM,2000,321,,947-953	P121/c1	3D	3	A*B2)3	pcu alpha-Po primitive cubic; 6/4/c1; sqc1	octahedron	|Mn|Fe|	|2|3|	|6|	|N6|C6|	1
93725	Be(CN)2	Beryllium Cyanide.	Williams D.,Pleune B.,Leinenweber K.,Kouvetakis J.	J. Solid State Chem.,2001,159,,244-250	Pn-3m	3D	2	A*B2)2	dia Diamond; 4/6/c1; sqc6	tetrahedron	|Be|	|2|	|4|	|C4|	2	Ia
93726	Mg(CN)2	Magnesium Cyanide.	Williams D.,Pleune B.,Leinenweber K.,Kouvetakis J.	J. Solid State Chem.,2001,159,,244-250	Pn-3m	3D	2	A*B2)2	dia Diamond; 4/6/c1; sqc6	tetrahedron	|Mg|	|2|	|4|	|C4|	2	Ia
93727	Al(CN)3	Aluminium Cyanide.	Williams D.,Pleune B.,Leinenweber K.,Kouvetakis J.	J. Solid State Chem.,2001,159,,244-250	Pm-3m	3D	3	A*B2)3	pcu alpha-Po primitive cubic; 6/4/c1; sqc1	octahedron	|Al|	|3|	|6|	|C6|	1	-
94868	Cu(CN)	Copper(I) Cyanide - Alpha.	Hibble S.J.,Cheyne S.M.,Hannon A.C.,Eversfield S.G.	Inorg. Chem.,2002,41,,4990-4992	R-3m	1D	1	A*B2	2C1	linear	|Cu|	|1|	|2|	|C2|	0	-
99499	K2Cu(Fe(CN)6)	Dipotassium Copper Hexacyanoferrate(II).	Loos-Neskovic C.,Ayrault S.,Badillo V.,Jimenez B.,Garnier E.,Fedoroff M.,Jones D.J.,Merinov B.	J. Solid State Chem.,2004,177,,1817-1828	P-1	2D	3	A*B2)2*M1	sql/Shubnikov tetragonal plane net	octahedron & square	|Fe|Cu|	|2|	|6|4|	|C6|N4|	1	-
100326	K2(Zn(CN)4)	Dipotassium Tetracyanozincate.	Ahsbahs H.	Z. Kristallogr.,1979,149,,151-152	R-3cr	0D	4	A*M1)4	1,4M5-1	tetrahedron	|Zn|	|2|	|4|	|C4|	0	-
100406	K8Zn4(CN)16(H2O)9/Distance=2.10A(Set #1)	Potassium Tetracyanozincate 2.25-hydrate.	Ahsbahs H.	Z. Kristallogr.,1981,154,,243-244	Pbam	0D	4	A*M1)4	1,4M5-1	tetrahedron	|Zn|	|2|	|4|	|C4|	0
100684	Rb2(Hg(CN)4)	Dirubidium Tetracyanomercurate - Alpha.	Kluefers R.,Fuess H.,Haussuehl S.	Zeitschrift fuer Kristallographie (149,1979-),1981,156,,255-263	R-3c	0D	4	A*M1)4	1,4M5-1	tetrahedron	|Hg|	|2|	|4|	|C4|	0	-
104000	K4(V(CN)7)(H2O)2/Distance=2.20A(Set #1)	Tetrapotassium Heptacyanovanadate(III) Dihydrate.	Levenson R.A.,Towns R.L.R.	Inorg. Chem.,1974,13,,105-109	I121	0D	7	A*M1)7	1,7M8-1	pentagonal bipyramid	|V|	|3|	|7|	|C7|	0
107673	(((CH3)3S)Cd3(CN)7)(C6H6)2/Distance=2.50A(Set #1)	Trimethylsulfide Heptacyanotricadmate - Benzene (1/2).	Kitazawa T.,Nishikiori S.I.,Iwamoto T.	Journal of the Chemical Society. Dalton Transactions, Inorganic Chemistry (1972-),1994,1994,,3695-3710	Pnam	3D	2.33	A)3*B2)7	fsk	octahedron & tetrahedron	|Cd|	|2|	|6|4|	|N6|C4|	1
109706	((CH3)4N)(CuZn(CN)4)	Tetramethylammonium Tetracyanocupro(I)zincate.	Kitazawa T.,Nishikiori S.I.,Kuroda R.,Iwamoto T.	Journal of the Chemical Society. Dalton Transactions, Inorganic Chemistry (1972-),1994,1994,,1029-1035	F-43m	3D	2	A*B2)2	dia Diamond; 4/6/c1; sqc6	tetrahedron	|Cu|Zn|	|1|2|	|4|	|C4|N4|	1	-
151546	KCu((Co0.7Fe0.3)(CN)6)	Potassium Copper Cobalt(III) Iron(III) Cyanide (1/1/0.7/0.3/6).	Petrovic-Prelevic I.,Widmann A.,Kahlert H.,Wulff H.,Scholz F.	MATERIALS SCIENCE FORUM,2004,443,,345-348	Fm-3m	3D	3	A*B2)3	pcu alpha-Po primitive cubic; 6/4/c1; sqc1	octahedron	|Co|Fe|Cu|	|3|2|	|6|	|C6|N6|	1	-
151548	Fe(Co0.2Fe0.8(CN)6)	Iron(III) Cobalt(III) Cyanide (1.8/0.2/6).	Petrovic-Prelevic I.,Widmann A.,Kahlert H.,Wulff H.,Scholz F.	MATERIALS SCIENCE FORUM,2004,443,,345-348	Fm-3m	3D	3	A*B2)3	pcu alpha-Po primitive cubic; 6/4/c1; sqc1	octahedron	|Fe|Co|	|3|	|6|	|N6|C6|	1	-
151695	MnCs2(Fe(CN)6)	Manganese Dicesium Hexacyanoferrate(II).	Martinez-Garcia R.,Reguera E.,Rodriguez J.,Balmaseda J.,Roque J.	Powder Diffraction,2004,19,,255-264	Fm-3m	3D	3	A*B2)3	pcu alpha-Po primitive cubic; 6/4/c1; sqc1	octahedron	|Mn|Fe|	|2|	|6|	|N6|C6|	1	-
151696	CdCs2(Fe(CN)6)	Cadmium Dicesium Hexacyanoferrate(II).	Martinez-Garcia R.,Reguera E.,Rodriguez J.,Balmaseda J.,Roque J.	Powder Diffraction,2004,19,,255-264	Fm-3m	3D	3	A*B2)3	pcu alpha-Po primitive cubic; 6/4/c1; sqc1	octahedron	|Fe|Cd|	|2|	|6|	|C6|N6|	1	-
151697	MnK2(Fe(CN)6)(H2O)2/Distance=2.80A(Set #1);Distance=0.00A(Set #1);Distance=0.00A(Set #1);Distance=0.00A(Set #1)	Manganese Dipotassium Hexacyanoferrate(II).	Martinez-Garcia R.,Reguera E.,Rodriguez J.,Balmaseda J.,Roque J.	Powder Diffraction,2004,19,,255-264	Pmn21	3D	3	A*B2)3	pcu alpha-Po primitive cubic; 6/4/c1; sqc1	octahedron	|Mn|Fe|	|2|	|6|	|N6|C6|	1
151698	CdK2(Fe(CN)6)(H2O)2/Distance=2.00A(Set #1);Distance=0.00A(Set #1);Distance=2.80A(Set #1);Distance=0.00A(Set #1)	Cadmium Dipotassium Hexacyanoferrate(II).	Martinez-Garcia R.,Reguera E.,Rodriguez J.,Balmaseda J.,Roque J.	Powder Diffraction,2004,19,,255-264	Pmn21	3D	3	A*B2)3	pcu alpha-Po primitive cubic; 6/4/c1; sqc1	octahedron	|Fe|Cd|	|2|	|6|	|C6|N6|	1
151706	NiCs2(Fe(CN)6)	Nickel Dicesium Hexacyanoferrate(II).	Martinez-Garcia R.,Reguera E.,Balmaseda J.,Ramos G.,Yee-Madeira H.	Powder Diffraction,2004,19,,284-291	Fm-3m	3D	3	A*B2)3	pcu alpha-Po primitive cubic; 6/4/c1; sqc1	octahedron	|Fe|Ni|	|2|	|6|	|C6|N6|	1	-
151707	NiK2(Fe(CN)6)(H2O)2/Distance=2.30A(Set #3)	Nickel Dipotassium Hexacyanoferrate(II) Dihydrate.	Martinez-Garcia R.,Reguera E.,Balmaseda J.,Ramos G.,Yee-Madeira H.	Powder Diffraction,2004,19,,284-291	Pmn21	3D	3	A*B2)3	pcu alpha-Po primitive cubic; 6/4/c1; sqc1	octahedron	|Fe|Ni|	|2|	|6|	|C6|N6|	1
151708	NiNa2(Fe(CN)6)(H2O)2/Distance=2.20A(Set #1)	Nickel Disodium Hexacyanoferrate(II) Dihydrate.	Martinez-Garcia R.,Reguera E.,Balmaseda J.,Ramos G.,Yee-Madeira H.	Powder Diffraction,2004,19,,284-291	Pmn21	3D	3	A*B2)3	pcu alpha-Po primitive cubic; 6/4/c1; sqc1	octahedron	|Fe|Ni|	|2|	|6|	|C6|N6|	1
153672	Fe(Fe(CN)6)(H2O)4	Iron(III) Hexacyanoferrate(III) Tetrahydrate.	Kumar A.,Yusuf S.M.,Keller L.	Physical Review, Serie 3. B - Condensed Matter (18,1978-),2005,71,,054414-1	Fm-3m	3D	3	A*B2)3	pcu alpha-Po primitive cubic; 6/4/c1; sqc1	octahedron	|Fe|	|3|	|6|	|C6|N6|	1	-
155196	Rb4(Mo(CN)8)(H2O)3/Distance=2.20A(Set #1)	Tetrarubidium Octacyanomolybdate(IV) Trihydrate.	Semenishin D.I.,Glowiak T.,Mys'Kiv M.G.	Koordinatsionnaya Khimiya (= Coordination Chemistry (USSR)),1985,11,,122-128	P41212	0D	8	A*M1)8	1,8M9-1	trigonal dodecahedron	|Mo|	|4|	|8|	|C8|	0
157486	CoK(Fe(CN)6)(H2O)0.5	Cobalt Potassium Hexacyanoferrate Hemihydrate.	Martinez-Garcia R.,Knobel M.,Balmaseda J.,Yee-Madeira H.,Reguera E.	J. Phys. Chem. Solids,2007,68,,290-298	Pmn21	3D	3	A*B2)3	pcu alpha-Po primitive cubic; 6/4/c1; sqc1	octahedron	|Fe|Co|	|3|2|	|6|	|C6|N6|	1
157850	Zn3(Fe(CN)6)2	Trizinc Bis(hexacyanoferrate(III)).	Rodriguez-Hernandez J.,Reguera E.,Lima E.,Balmaseda J.,Martinez-Garcia R.,Yee-Madeira H.	J. Phys. Chem. Solids,2007,68,,1630-1642	R-3c	3D	2.4	A)5*B2)12	cor/corundum, Al2O3	octahedron & tetrahedron	|Fe|Zn|	|3|2|	|6|4|	|C6|N4|	1	-
157851	Zn3Rb1.92(Fe(CN)6)2(H2O)4.98/Distance=2.00A(Set #1)	Zinc Rubidium Hexacyanoferrate(II) Hydrate (3/1.92/2/4.98).	Rodriguez-Hernandez J.,Reguera E.,Lima E.,Balmaseda J.,Martinez-Garcia R.,Yee-Madeira H.	J. Phys. Chem. Solids,2007,68,,1630-1642	R-3c	3D	2.4	A)5*B2)12	cor/corundum, Al2O3	octahedron & tetrahedron	|Fe|Zn|	|2|	|6|4|	|C6|N4|	1
157852	Zn3(NH4)2(Fe(CN)6)2(H2O)9.54/Distance=2.00A(Set #1)	Trizinc Diammonium Bis(hexacyanoferrate(II)) 9.54-hydrate.	Rodriguez-Hernandez J.,Reguera E.,Lima E.,Balmaseda J.,Martinez-Garcia R.,Yee-Madeira H.	J. Phys. Chem. Solids,2007,68,,1630-1642	R-3c	3D	2.4	A)5*B2)12	cor/corundum, Al2O3	octahedron & tetrahedron	|Fe|Zn|	|2|	|6|4|	|C6|N4|	1
161414	ZnAu2(CN)4	Zinc Digold Tetracyanide.	Hoskins B.F.,Robson R.,Scarlett N.V.Y.	Angewandte Chemie (Edition international),1995,34,,1203-1204	P6422	3D	1.33	A)3*B2)4	qtz Quartz; 4/6/h1	tetrahedron & linear	|Zn|Au|	|2|1|	|4|2|	|N4|C2|	6	IIIa
165174	Au(CN)	Gold Cyanide.	Hibble S.J.,Hannon A.C.,Cheyne S.M.	Inorganic Chemistry,2003,42,15,4724-4730	P6/mmm	1D	1	A*B2	2C1	linear	|Au|	|1|	|2|	|C2|	0	-
165379	Tl(Au(CN)2)	Thallium Dicyanoaurate(I).	Fischer P.,Ludi A.,Patterson H.H.,Hewat A.W.	Inorganic Chemistry,1994,33,1,62-66	Pbcn	0D	2	A*M1)2	1,2M3-1	linear	|Au|	|1|	|2|	|C2|	0	-
167115	KCd(Cr(CN)6)(H2O)/Distance=2.10A(Set #1)	Potassium Cadmium Hexacyanochromate(III) Hydrate.	Chu Chaoxia,Yuan Aihua,Liu Wenyan,Shen Xiangqian,Meng Xianfeng	Hua Hsueh Hsueh Pao,2008,66,24,2700-2704	Fm-3m	0D	6	A*M1)6	1,6M7-1	octahedron	|Cr|	|3|	|6|	|C6|	0
168524	K2(Cd(CN)4)	Dipotassium Tetracyanocadmate.	Ziegler B.,Babel D.	Zeitschrift fuer Naturforschung, Teil B. Anorganische Chemie, Organische Chemie (42,1987-),1991,46,,47-49	Fd-3m	0D	4	A*M1)4	1,4M5-1	tetrahedron	|Cd|	|2|	|4|	|C4|	0	-
170125	K(Tl(CN)4)	Potassium Tetracyanothallate.	Nagy P.,Fischer A.,Glaser J.,Ilyukhin A.,Maliarik M.,Toth I.	Inorganic Chemistry,2005,44,7,2347-2357	I41/a	0D	4	A*M1)4	1,4M5-1	tetrahedron	|Tl|	|3|	|4|	|C4|	0	-
170126	Na(Tl(CN)4)(H2O)3/Distance=0.00A(Set #1)	Sodium Tetracyanidothallate(III) Trihydrate.	Nagy P.,Fischer A.,Glaser J.,Ilyukhin A.,Maliarik M.,Toth I.	Inorg. Chem.,2005,44,,2347-2357	C12/c1	0D	4	A*M1)4	1,4M5-1	tetrahedron	|Tl|	|3|	|4|	|C4|	0
170329	Na(MnCr(CN)6)	Sodium Manganese(II) Hexacyanochromate(III).	Dong W.,Zhu L.-N.,Song H.-B.,Liao D.-Z.,Jiang Z.-H.,Yan S.-P.,Cheng P.,Gao S.	Inorg. Chem.,2004,43,,2465-2467	Fm-3m	3D	3	A*B2)3	pcu alpha-Po primitive cubic; 6/4/c1; sqc1	octahedron	|Cr|Mn|	|3|2|	|6|	|C6|N6|	1	-
171260	K2PtHg(CN)6(H2O)2	Dipotassium Platinum Mercury Hexacyanide Dihydrate.	Joszai R.,Beszeda I.,Benyei C.,Fischer A.,Kovacs M.,Maliarik M.,Nagy P.,Shchukarev A.,Toth I.	Inorg. Chem.,2005,44,,9643-9651	P121/c1	0D	3	A)2*M1)6	1,4M5-1|1,2M3-1	square & linear	|Pt|Hg|	|2|	|4|2|	|C4|C2|	0	-
171261	Na2PdHg(CN)6(H2O)2/Distance=2.00A(Set #1);Distance=0.00A(Set #1);Distance=2.40A(Set #1);Distance=0.00A(Set #1)	Disodium Palladium Mercury Hexacyanide Dihydrate.	Joszai R.,Beszeda I.,Benyei C.,Fischer A.,Kovacs M.,Maliarik M.,Nagy P.,Shchukarev A.,Toth I.	Inorg. Chem.,2005,44,,9643-9651	P-1	0D	3	A)2*M1)6	1,4M5-1|1,2M3-1	square & linear	|Pd|Hg|	|2|	|4|2|	|C4|C2|	0
171262	K2NiHg(CN)6(H2O)2/Distance=2.00A(Set #1);Distance=0.00A(Set #1);Distance=2.40A(Set #1);Distance=0.00A(Set #1)	Dipotassium Nickel Mercury Hexacyanide Dihydrate.	Joszai R.,Beszeda I.,Benyei C.,Fischer A.,Kovacs M.,Maliarik M.,Nagy P.,Shchukarev A.,Toth I.	Inorg. Chem.,2005,44,,9643-9651	C12/c1	0D	3	A)2*M1)6	1,4M5-1|1,2M3-1	square & linear	|Ni|Hg|	|2|	|4|2|	|C4|C2|	0
171492	Rb2(Pt(CN)4)	Dirubidium Tetracyanoplatinate(II).	Muehle C.,Karpov A.,Jansen M.	Z. Naturforsch., B: Chem. Sci.,2005,60,,1269-1272	Imma	0D	4	A*M1)4	1,4M5-1	square	|Pt|	|2|	|4|	|C4|	0	-
171615	Er(Co(CN)6)	Erbium Hexacyanocobaltate(III).	Pretsch T.,Chapman K.W.,Halder G.J.,Kepert C.J.	Chem. Commun. (Cambridge, U. K.),2006,2006,,1857-1859	P63/mmc	3D	3	A*B2)3	nia	octahedron & trigonal prism	|Co|Er|	|3|	|6|	|C6|N6|	1	-
172539	(Na2(MnFe(CN)6))0.5/Distance=2.00A(Set #1)	Disodium Manganese(II) Hexacyanoferrate(II).	Jiang L.,Feng X.-L.,Lu T.-B.,Gao S.	Inorg. Chem.,2006,45,,5018-5026	Pm-3m	3D	3	A*B2)3	pcu alpha-Po primitive cubic; 6/4/c1; sqc1	octahedron	|Mn|Fe|	|2|	|6|	|C6|	1
172563	Cs2Cu3(CN)5	Dicesium Pentacyanocuprate(I).	Chippindale A.M.,Hibble S.J.,Pohl A.H.,Bilbe E.J.	Acta Crystallogr., Sect. E: Struct. Rep. Online,2006,62,,i140-i142	C12/c1	2D	1.67	A)3*B2)4*M1	hcb; Shubnikov hexagonal plane net/(6,3)	triangular	|Cu|	|1|	|3|	|CN2|C2N|	1	-
173041	Mn(Mn0.2Cr0.8(CN)6)(H2O)4/Distance=2.20A(Set #1)	Manganese(III) Chromium(III) Cyano Hydrate (1.2/0.8/6/4).	Shen Xiaoping,Li Yizhi,Song You,Xu Zheng,Guo Guocong	Eur. J. Inorg. Chem.,2007,2007,,1698-1702	Fm-3m	3D	3	A*B2)3	pcu alpha-Po primitive cubic; 6/4/c1; sqc1	octahedron	|Cr|Mn|	|3|	|6|	|C6|N6|	1
173553	Ag3(Fe(CN)6)	Trisilver(I) Hexacyanoferrate(III).	Goodwin A.L.,Keen D.A.,Tucker M.G.,Dove M.T.,Peters L.,Evans J.S.O.	J. Am. Chem. Soc.,2008,130,,9660-9661	P-31m	3D	1.5	A)2*B2)3	pcu alpha-Po primitive cubic; 6/4/c1; sqc1	octahedron & linear	|Fe|Ag|	|3|1|	|6|2|	|C6|N2|	3	Ia
173555	D3(Co(CN)6)	Trideuterium Hexacyanocobaltate(III).	Goodwin A.L.,Keen D.A.,Tucker M.G.,Dove M.T.,Peters L.,Evans J.S.O.	J. Am. Chem. Soc.,2008,130,,9660-9661	P-31m	0D	6	A*M1)6	1,6M7-1	octahedron	|Co|	|3|	|6|	|C6|	0	-
180375	(K(H2O)11.2)(CuZn(CN)4)/Distance=2.10A(Set #2)	(potassium Aqua) (copper Zinc Tetracyanide) - Clathrate(1/11.2/1/1/1).	Dan H.,Nishikiori S.,Yamamuro O.	Dalton,2011,40,,1168-1174	P63mc	3D	2	A*B2)2	lon; 4/6/h2	tetrahedron	|Cu|Zn|	|1|2|	|4|	|C4|N4|	1
181373	Cs2(Pt(CN)4)(H2O)0.75	Dicesium Tetracyanoplatinate 0.75-hydrate.	Neuhausen C.,Pattison P.,Schiltz M.	Crystal Engineering Communications,2011,13,2,430-432	P121/c1	0D	4	A*M1)4	1,4M5-1	square	|Pt|	|2|	|4|	|C4|	0
182316	KCs2Rh(CN)6/Distance=2.10A(Set #1)	Potassium Dicesium Rhodium Hexacyanide.	Volkov S.V.,Mironov Yu.V.,Yarovoi S.S.,Smolentsev A.I.,Yanko O.G.,Khar'kova L.B.,Fokina Z.A.	Zhurnal Neorganicheskoi Khimii,2011,56,3,424-427	P121/n1	0D	6	A*M1)6	1,6M7-1	octahedron	|Rh|	|3|	|6|	|C6|	0
182335	Rb4(W(CN)8)(H2O)2/Distance=2.20A(Set #1)	Tetrarubidium Octacyanotungstate(IV) Dihydrate.	Tipilo I.V.,Gladyshevskii R.E.,Semenishin D.I.	Ukrains'kii Khimicheskii Zhurnal (Russian Edition),2010,76,,77-80	Pnma	0D	8	A*M1)8	1,8M9-1	trigonal dodecahedron	|W|	|4|	|8|	|C8|	0
200037	K5(Mo(CN)7)(H2O)/Distance=2.20A(Set #1)	Potassium Heptacyanomolybdate(II) Hydrate.	Drew M.G.B.,Mitchell P.C.H.,Pygall C.F.	Journal of the Chemical Society. Dalton Transactions, Inorganic Chemistry (1972-),1977,1977,,1071-1077	I1	0D	7	A*M1)7	1,7M8-1	pentagonal bipyramid	|Mo|	|2|	|7|	|C7|	0
200038	Na5(Mo(CN)7)(H2O)10/Distance=2.30A(Set #1)	Pentasodium Heptacyanomolybdate(II) Decahydrate.	Drew M.G.B.,Mitchell P.C.H.,Pygall C.F.,Haines R.J.,Nassimbeni L.R.	Journal of the Chemical Society. Dalton Transactions, Inorganic Chemistry (1972-),1977,1977,,1071-1077	P-1	0D	7	A*M1)7	1,7M8-1	pentagonal bipyramid	|Mo|	|2|	|7|	|C7|	0
200201	K3(Fe(CN)6)	Tripotassium Hexacyanoferrate(III).	Figgis B.N.,Skelton B.W.,White A.H.	Aust. J. Chem.,1978,31,,1195-1199	Pnca	0D	6	A*M1)6	1,6M7-1	octahedron	|Fe|	|3|	|6|	|C6|	0	-
200458	K4Nb(CN)8(H2O)2/Distance=2.30A(Set #1)	Tetrapotassium Octacyanoniobate(IV) Dihydrate.	Laing M.,Gafner G.,Griffith W.P.,Kiernan P.M.	Inorg. Chim. Acta,1979,33,,119-119	Pna21	0D	8	A*M1)8	1,8M9-1	trigonal dodecahedron	|Nb|	|4|	|8|	|C8|	0
201056	KCo(Au(CN)2)3	Potassium Cobalt Dicyanoaurate(I).	Abrahams S.C.,Bernstein J.L.,Liminga R.,Eisenmann E.T.	Journal of Chemical Physics,1980,73,,4585-4590	P312	3D	1.5	A)2*B2)3	pcu alpha-Po primitive cubic; 6/4/c1; sqc1	octahedron & linear	|Co|Au|	|2|1|	|6|2|	|N6|C2|	3	Ia
201181	Na.95Cu3.52(Fe(CN)6)2	Sodium Copper Hexacyanoferrate(II) (0.95/3.5/2).	Bennett B.A.,Shahbandeh M.R.,Streat M.	Journal of Chemical Technology and Biotechnology,1982,32,,586-593	Fm-3m	3D	3	A*B2)3	pcu alpha-Po primitive cubic; 6/4/c1; sqc1	octahedron	|Fe|Cu|	|2|	|6|	|C6|N6|	1	-
201201	K4(Re(CN)7)(H2O)2/Distance=2.10A(Set #1)	Tetrapotassium Heptacyanorhenate(III) Dihydrate.	Manoli J.M.,Potvin C.,Bregeault J.M.,Griffith W.P.	Journal of the Chemical Society. Dalton Transactions, Inorganic Chemistry (1972-),1980,1980,,192-195	I121	0D	7	A*M1)7	1,7M8-1	pentagonal bipyramid	|Re|	|3|	|7|	|C7|	0
202570	Tl2Pt(CN)4	Thallium Tetracyanoplatinate(II).	Nagle J.K.,Balch A.L.,Olmstead M.M.	J. Am. Chem. Soc.,1988,110,,319-321	P121/n1	0D	4	A*M1)4	1,4M5-1	square	|Pt|	|2|	|4|	|C4|	0	-
240225	(N(CH3)4)2Na(H2O)(Cr(CN)6)	Bis(tetramethylammonium) Sodium Hydrate Hexacyanochromate.	Schwarten M.,Witzel M.,Babel D.	Z. Naturforsch., B: Chem. Sci.,2000,55,,487-494	Pnmm	0D	6	A*M1)6	1,6M7-1	octahedron	|Cr|	|3|	|6|	|C6|	0
248018	K4(Mo(CN)7)(H2O)2/Distance=2.20A(Set #1)	Tetrapotassium Heptacyanidomolybdate(III) Dihydrate.	Nakabayashi K.,Tomono K.,Tsunobuchi Y.,Kosaka W.,Ohkoshi S.-I.	Acta Crystallographica E , Structure Reports Online,2009,65,11,i79-i80	P-1	0D	7	A*M1)7	1,7M8-1	single-cap trigonal prism	|Mo|	|3|	|7|	|C7|	0
248044	K2Mn(Mn(CN)6)	Potassium Manganese(II) Hexacyanomanganate(II).	Her JAE-HYUK,Stephens P.W.,Kareis C.M.,Moore J.G.,Min KIL SIK,Parkjong-Won,Bali G.,Kennon B.S.,Miller J.S.	Inorganic Chemistry,2010,49,4,1524-1534	P121/n1	3D	3	A*B2)3	pcu alpha-Po primitive cubic; 6/4/c1; sqc1	octahedron	|Mn|	|2|	|6|	|C6|N6|	1	-
248045	Rb2Mn(Mn(CN)6)	Rubidium Manganese(II) Hexacyanomanganate(II).	Her JAE-HYUK,Stephens P.W.,Kareis C.M.,Moore J.G.,Min KIL SIK,Parkjong-Won,Bali G.,Kennon B.S.,Miller J.S.	Inorganic Chemistry,2010,49,4,1524-1534	P121/n1	3D	3	A*B2)3	pcu alpha-Po primitive cubic; 6/4/c1; sqc1	octahedron	|Mn|	|2|	|6|	|C6|N6|	1	-
248046	Cs2Mn(Mn(CN)6)	Cesium Manganese(II) Hexacyanomanganate(II).	Her JAE-HYUK,Stephens P.W.,Kareis C.M.,Moore J.G.,Min KIL SIK,Parkjong-Won,Bali G.,Kennon B.S.,Miller J.S.	Inorganic Chemistry,2010,49,4,1524-1534	Fm-3m	3D	3	A*B2)3	pcu alpha-Po primitive cubic; 6/4/c1; sqc1	octahedron	|Mn|	|2|	|6|	|N6|C6|	1	-
249564	Tl2Ni(CN)4	Dithallium Tetracyanonickelate(II).	Maliarik M.,Nagle J.K.,Ilyukhin A.,Murashova E.,Mink J.,Skripkin M.YU.,Glaser J.,Kovacs M.,Horvath A.	Inorg. Chem.,2007,46,,4642-4653	P121/n1	0D	4	A*M1)4	1,4M5-1	square	|Ni|	|2|	|4|	|C4|	0	-
249565	Tl2Pd(CN)4	Dithallium Tetracyanopalladate(II).	Maliarik M.,Nagle J.K.,Ilyukhin A.,Murashova E.,Mink J.,Skripkin M.YU.,Glaser J.,Kovacs M.,Horvath A.	Inorg. Chem.,2007,46,,4642-4653	P121/n1	0D	4	A*M1)4	1,4M5-1	square	|Pd|	|2|	|4|	|C4|	0	-
249724	K(Ni(Au(CN)2)3)	Potassium Tris(dicyanoaurate) Niccolate.	Lefebvre J.,Trudel S.,Hill R.H.,Leznoff D.B.	Chemistry--A European Journal,2008,14,,7156-7167	P312	3D	1.5	A)2*B2)3	pcu alpha-Po primitive cubic; 6/4/c1; sqc1	octahedron & linear	|Ni|Au|	|2|1|	|6|2|	|N6|C2|	3	Ia
260301	K4Fe(CN)6(H2O)3/Distance=2.00A(Set #1)	Tetrapotassium Hexacyanoferrate(II) Trihydrate.	Willans M.J.,Wasylishen R.E.,McDonald R.	Inorganic Chemistry,2009,48,,4342-4353	C12/c1	0D	6	A*M1)6	1,6M7-1	octahedron	|Fe|	|2|	|6|	|C6|	0
260302	K4Fe(CN)6(H2O)3/Distance=2.00A(Set #1)	Tetrapotassium Hexacyanoferrate(II) Trihydrate.	Willans M.J.,Wasylishen R.E.,McDonald R.	Inorganic Chemistry,2009,48,,4342-4353	C1c1	0D	6	A*M1)6	1,6M7-1	octahedron	|Fe|	|2|	|6|	|C6|	0
260354	Zn(Au(CN)2)2	Zinc Bis(dicyanoaurate).	Goodwin A.L.,Kennedy B.J.,Kepert C.J.	Journal of the American Chemical Society,2009,131,,6334-6335	P6222	3D	1.33	A)3*B2)4	qtz Quartz; 4/6/h1	tetrahedron & linear	|Zn|Au|	|2|1|	|4|2|	|N4|C2|	6	IIIa
260357	Zn(Ag(CN)2)2(AgCN)0.57	Zinc Bis(dicyanoargentate) Silver Cyanide.	Goodwin A.L.,Kennedy B.J.,Kepert C.J.	Journal of the American Chemical Society,2009,131,,6334-6335	P6222	3D	1.33	A)3*B2)4	qtz Quartz; 4/6/h1	tetrahedron & linear	|Ag|Zn|	|2|1|	|2|4|	|C2|N4|	6	3*2
260896	Cs1.5Na0.5(Pt(CN)4)(H2O)1.5/Distance=2.00A(Set #1)	Sesquicesium Hemisodium Tetracyanidoplatinate(II) Sesquihydrate.	Weber A.P.,Stojanovic M.,Pischek M.R.,Sykora R.E.	Acta Crystallographica E , Structure Reports Online,2010,66,9,i66-i66	C12/c1	0D	4	A*M1)4	1,4M5-1	square	|Pt|	|2|	|4|	|C4|	0
261195	Pd(CN)2	Palladium Bis(cyanide).	Hibble S.J.,Chippindale A.M.,Bilbe E.J.,Marelli E.,Harris P.J.F.,Hannon A.C.	Inorganic Chemistry,2011,50,1,104-113	I41/amd	2D	2	A*B2)2	sql/Shubnikov tetragonal plane net	square	|Pd|	|2|	|4|	|C4|	1	-
261197	Pt(CN)2	Platinum Bis(cyanide).	Hibble S.J.,Chippindale A.M.,Bilbe E.J.,Marelli E.,Harris P.J.F.,Hannon A.C.	Inorganic Chemistry,2011,50,1,104-113	I41/amd	2D	2	A*B2)2	sql/Shubnikov tetragonal plane net	square	|Pt|	|2|	|4|	|C4|	1	-
262446	Mn(CN)2	Manganese(II) Dicyanide.	Kareis C.M.,Lapidus S.H.,Stephens P.W.,Miller J.S.	Inorganic Chemistry,2012,51,10,3046-3050	Pn-3m	3D	2	A*B2)2	dia Diamond; 4/6/c1; sqc6	tetrahedron	|Mn|	|2|	|4|	|C4|	2	Ia
262657	Cu3(Co(CN)6)2(H2O)12	Tricopper(II) Bis(hexacyanocobaltate(III)) Dodecahydrate.	Adak S.,Daemen L.L.,Hartl M.,Williams D.,Summerhill J.,Nakotte H.	Journal of Solid State Chemistry,2011,184,11,2854-2861	Fm-3m	3D	3	A*B2)3	pcu alpha-Po primitive cubic; 6/4/c1; sqc1	octahedron	|Co|Cu|	|3|2|	|6|	|C6|N6|	1
262659	Mn3(Fe(CN)6)2(H2O)14	Trimanganese(II) Bis(hexacyanoferrate(III)) Tetradecahydrate.	Adak S.,Daemen L.L.,Hartl M.,Williams D.,Summerhill J.,Nakotte H.	Journal of Solid State Chemistry,2011,184,11,2854-2861	F-43m	3D	3	A*B2)3	pcu alpha-Po primitive cubic; 6/4/c1; sqc1	octahedron	|Mn|Fe|	|2|3|	|6|	|N6|C6|	1
262660	Fe3(Fe(CN)6)2(H2O)14	Triiron(II) Bis(hexacyanoferrate(III)) Tetradecahydrate.	Adak S.,Daemen L.L.,Hartl M.,Williams D.,Summerhill J.,Nakotte H.	Journal of Solid State Chemistry,2011,184,11,2854-2861	Fm-3m	3D	3	A*B2)3	pcu alpha-Po primitive cubic; 6/4/c1; sqc1	octahedron	|Fe|	|3|2|	|6|	|C6|N6|	1
262661	Co3(Fe(CN)6)2(H2O)17	Tricobalt(II) Bis(hexacyanoferrate(III)) Tetradecahydrate.	Adak S.,Daemen L.L.,Hartl M.,Williams D.,Summerhill J.,Nakotte H.	Journal of Solid State Chemistry,2011,184,11,2854-2861	F-43m	3D	3	A*B2)3	pcu alpha-Po primitive cubic; 6/4/c1; sqc1	octahedron	|Fe|Co|	|3|2|	|6|	|C6|N6|	1
262662	Ni3(Fe(CN)6)2(H2O)14	Trinickel(II) Bis(hexacyanoferrate(III)) Tetradecahydrate.	Adak S.,Daemen L.L.,Hartl M.,Williams D.,Summerhill J.,Nakotte H.	Journal of Solid State Chemistry,2011,184,11,2854-2861	F-43m	3D	3	A*B2)3	pcu alpha-Po primitive cubic; 6/4/c1; sqc1	octahedron	|Fe|Ni|	|3|2|	|6|	|C6|N6|	1
262663	Cu3(Fe(CN)6)2(H2O)14	Tricopper(II) Bis(hexacyanoferrate(III)) Tetradecahydrate.	Adak S.,Daemen L.L.,Hartl M.,Williams D.,Summerhill J.,Nakotte H.	Journal of Solid State Chemistry,2011,184,11,2854-2861	Fm-3m	3D	3	A*B2)3	pcu alpha-Po primitive cubic; 6/4/c1; sqc1	octahedron	|Fe|Cu|	|3|2|	|6|	|C6|N6|	1
262664	Zn3(Fe(CN)6)2(H2O)14	Trizinc(II) Bis(hexacyanoferrate(III)) Tetradecahydrate.	Adak S.,Daemen L.L.,Hartl M.,Williams D.,Summerhill J.,Nakotte H.	Journal of Solid State Chemistry,2011,184,11,2854-2861	Fm-3m	3D	3	A*B2)3	pcu alpha-Po primitive cubic; 6/4/c1; sqc1	octahedron	|Fe|Zn|	|3|2|	|6|	|N6|C6|	1
262668	Zn2(Fe(CN)6)(H2O)5/Distance=2.40A(Set #2)	Dizinc(II) Bis(hexacyanoferrate(II)) Pentahydrate.	Adak S.,Daemen L.L.,Hartl M.,Williams D.,Summerhill J.,Nakotte H.	Journal of Solid State Chemistry,2011,184,11,2854-2861	P-3	2D	2	A*B2)2	kgd; Shubnikov plane net (3.6.3.6)/dual	octahedron & triangular	|Fe|Zn|	|2|	|6|3|	|C6|N3|	1
280324	Cs2K(Mn(CN)6)	Dicesium Potassium Hexacyanomanganate(III).	Figgis B.N.,Sobolev A.N.,Kucharski E.S.,Broughton V.	Acta Crystallogr., Sect. C: Cryst. Struct. Commun.,2000,56,,735-737	P121/n1	0D	6	A*M1)6	1,6M7-1	octahedron	|Mn|	|3|	|6|	|C6|	0	-
280482	Na2(Ni(CN)4)(H2O)3/Distance=1.90A(Set #1)	Disodium Tetracyanoniccolate Trihydrate.	Ptasiewicz-Bak H.,Olovsson I.,McIntyre G.J.	Acta Crystallogr., Sect. B: Struct. Sci.,1998,54,,600-612	P-1	0D	4	A*M1)4	1,4M5-1	square	|Ni|	|2|	|4|	|C4|	0
281065	KCu((Fe(CN)6)0.3(Co(CN)6)0.7)	Potassium Copper Hexacyanoferrate(III) Hexacyanocobaltate(III)(1/1/0.3/0.7).	Widmann A.,Kahlert H.,Petrovic-Prelevic I.,Wulff H.,Yakhmi J.V.,Bagkar N.,Scholz F.	Inorg. Chem.,2002,41,,5706-5715	Fm-3m	3D	3	A*B2)3	pcu alpha-Po primitive cubic; 6/4/c1; sqc1	octahedron	|Co|Fe|Cu|	|3|2|	|6|	|C6|N6|	1
281066	KNi((Fe(CN)6)0.3(Co(CN)6)0.7)	Potassium Nickel Hexacyanoferrate(III) Hexacyanocobaltate(III)(1/1/0.3/0.7).	Widmann A.,Kahlert H.,Petrovic-Prelevic I.,Wulff H.,Yakhmi J.V.,Bagkar N.,Scholz F.	Inorg. Chem.,2002,41,,5706-5715	Fm-3m	3D	3	A*B2)3	pcu alpha-Po primitive cubic; 6/4/c1; sqc1	octahedron	|Co|Fe|Ni|	|3|2|	|6|	|C6|N6|	1
281280	KMn(Ag(CN)2)3	Potassium Manganese Tris(dicyanoargentate).	Geiser U.,Schlueter J.A.	Acta Crystallogr., Sect. C: Cryst. Struct. Commun.,2003,59,,21-23	P312	3D	1.5	A)2*B2)3	pcu alpha-Po primitive cubic; 6/4/c1; sqc1	octahedron & linear	|Mn|Ag|	|2|1|	|6|2|	|N6|C2|	3	Ia
281414	Cs2(Ni(CN)4)(H2O)/Distance=1.90A(Set #1)	Dicesium Tetracyanoniccolate Hydrate.	Cornelius J.B.,Trapp R.M.,Delord T.J.,Fronczek F.R.,Watkins S.F.,Orosz J.J.,Musselman R.L.	Inorg. Chem.,2003,42,,3026-3035	P61	0D	4	A*M1)4	1,4M5-1	square	|Ni|	|2|	|4|	|C4|	0
281477	Rb2(Ni(CN)4)(H2O)1.05/Distance=1.90A(Set #1)	Dirubidium Tetracyanoniccolate 1.05-hydrate.	Fronczek F.R.,Delord T.J.,Watkins S.F.,Gueorguieva P.,Stanley G.G.,Zizza A.S.,Cornelius J.B.,Mantz Y.A.,Musselman R.L.	Inorg. Chem.,2003,42,,7026-7036	P-1	0D	4	A*M1)4	1,4M5-1	square	|Ni|	|2|	|4|	|C4|	0
281478	Sr(Ni(CN)4)(H2O)5/Distance=1.90A(Set #1)	Strontium Tetracyanoniccolate Pentahydrate.	Fronczek F.R.,Delord T.J.,Watkins S.F.,Gueorguieva P.,Stanley G.G.,Zizza A.S.,Cornelius J.B.,Mantz Y.A.,Musselman R.L.	Inorg. Chem.,2003,42,,7026-7036	C12/m1	0D	4	A*M1)4	1,4M5-1	square	|Ni|	|2|	|4|	|C4|	0
281775	Rb(Cu2(CN)3)(H2O)/Distance=2.40A(Set #1);Distance=0.00A(Set #1);Distance=0.00A(Set #1);Distance=0.00A(Set #1)	Rubidium Tricyanodicuprate(I) Hydrate.	Pretsch T.,Bruedgam I.,Hartl H.	Zeitschrift fuer Anorganische und Allgemeine Chemie,2004,630,,353-360	P121/c1	2D	1.5	A)2*B2)3	hcb; Shubnikov hexagonal plane net/(6,3)	triangular	|Cu|	|1|	|3|	|C2N|CN2|	1
281776	Cs(Cu2(CN)3)(H2O)/Distance=2.00A(Set #1);Distance=0.00A(Set #1);Distance=0.00A(Set #1);Distance=0.00A(Set #1)	Cesium Tricyanodicuprate(I) Hydrate.	Pretsch T.,Bruedgam I.,Hartl H.	Z. Anorg. Allg. Chem.,2004,630,,353-360	Pbca	2D	1.5	A)2*B2)3	hcb; Shubnikov hexagonal plane net/(6,3)	triangular	|Cu|	|1|	|3|	|CN2|C2N|	1
391243	C9Cu9N9/Distance=1.90A(Set #1)	Beta-copper(I) Cyanide.	Hibble S.J.,Eversfield S.G.,Cowley A.R.,Chippindale A.M.	Angew. Chem., Int. Ed.,2004,43,,628-630	C2221	1D	1	A*B2	2C1	linear	|Cu|	|1|	|2|	|C2|CN|	1
408836	Cs7Na(Mo(CN)8)2(H2O)4.168/Distance=2.20A(Set #1)	Heptacesium Sodium Bis(octacyanomolybdate(IV)) 4.17-hydrate.	Meske W.,Babel D.	Z. Anorg. Allg. Chem.,1998,624,,1751-1755	I41/a	0D	8	A*M1)8	1,8M9-1	square antiprism	|Mo|	|4|	|8|	|C8|	0
409861	Rb2Ba(Pt(CN)4)2	Dirubidium Barium Bis(tetracyanoplatinate(II)).	Muehle C.,Nuss J.,Jansen M.	Z. Kristallogr. - New Cryst. Struct.,2005,220,,528-528	P4/mmm	0D	4	A*M1)4	1,4M5-1	square	|Pt|	|2|	|4|	|C4|	0	-
411119	Rb2Na(Cr(CN)6)	Dirubidium Sodium Hexacyanochromate(III).	Peschel S.,Ziegler B.,Schwarten M.,Babel D.	Z. Anorg. Allg. Chem.,2000,626,,1561-1566	P121/n1	0D	6	A*M1)6	1,6M7-1	octahedron	|Cr|	|3|	|6|	|C6|	0	-
411120	Cs2Na(Cr(CN)6)	Dicesium Sodium Hexacyanochromate(III).	Peschel S.,Ziegler B.,Schwarten M.,Babel D.	Z. Anorg. Allg. Chem.,2000,626,,1561-1566	P121/n1	0D	6	A*M1)6	1,6M7-1	octahedron	|Cr|	|3|	|6|	|C6|	0	-
411121	Rb2Na(Mn(CN)6)	Dirubidium Sodium Hexacyanomanganate(III).	Peschel S.,Ziegler B.,Schwarten M.,Babel D.	Z. Anorg. Allg. Chem.,2000,626,,1561-1566	P121/n1	0D	6	A*M1)6	1,6M7-1	octahedron	|Mn|	|3|	|6|	|C6|	0	-
411122	Cs2.1N0.91(Fe(CN)6)	Cesium Nitrogen Iron Cyanide (2.1/0.91/1/6).	Peschel S.,Ziegler B.,Schwarten M.,Babel D.	Z. Anorg. Allg. Chem.,2000,626,,1561-1566	P121/n1	0D	6	A*M1)6	1,6M7-1	octahedron	|Fe|	|3|	|6|	|C6|	0	-
411123	Cs2Na(Fe(CN)6)	Dicesium Sodium Hexacyanoferrate(III).	Peschel S.,Ziegler B.,Schwarten M.,Babel D.	Z. Anorg. Allg. Chem.,2000,626,,1561-1566	P121/n1	0D	6	A*M1)6	1,6M7-1	octahedron	|Fe|	|3|	|6|	|C6|	0	-
411125	Cs2Rb(Fe(CN)6)	Dicesium Rubidium Hexacyanoferrate(III).	Peschel S.,Ziegler B.,Schwarten M.,Babel D.	Z. Anorg. Allg. Chem.,2000,626,,1561-1566	P121/n1	0D	6	A*M1)6	1,6M7-1	octahedron	|Fe|	|3|	|6|	|C6|	0	-
411126	Cs2Na(Co(CN)6)	Dicesium Sodium Hexacyanocobaltate(III).	Dahlke P.,Peschel S.,Ziegler B.,Schwarent M.,Babel D.	Z. Anorg. Allg. Chem.,2000,626,,1561-1566	P121/n1	0D	6	A*M1)6	1,6M7-1	octahedron	|Co|	|3|	|6|	|C6|	0	-
411127	Cs2K(Co(CN)6)	Dicesium Potassium Hexacyanocobaltate(III).	Peschel S.,Ziegler B.,Schwarten M.,Babel D.	Z. Anorg. Allg. Chem.,2000,626,,1561-1566	P121/n1	0D	6	A*M1)6	1,6M7-1	octahedron	|Co|	|3|	|6|	|C6|	0	-
411128	Cs2Rb(Co(CN)6)	Dicesium Rubidium Hexacyanocobaltate(III).	Peschel S.,Ziegler B.,Schwarten M.,Babel D.	Z. Anorg. Allg. Chem.,2000,626,,1561-1566	P121/n1	0D	6	A*M1)6	1,6M7-1	octahedron	|Co|	|3|	|6|	|C6|	0	-
412315	Hg(CN)2	Mercury Cyanide.	Reckeweg O.,Simon A.	Z. Naturforsch., B: Chem. Sci.,2002,57,,895-900	I-42d	0D	2	A*M1)2	1,2M3-1	linear	|Hg|	|2|	|2|	|C2|	0	-
412417	Ag(CN)	Silver Cyanide.	Reckeweg O.,Simon A.	Zeitschrift fuer Naturforschung, Teil B. Anorganische Chemie, Organische Chemie (42,1987-),2002,57,,895-900	R-3m	1D	1	A*B2	2C1	linear	|Ag|	|1|	|2|	|C2|	0	-
413098	Zn(CN)2	Zinc Cyanide.	Goodwin A.L.,Kepert C.J.	Phys. Rev. B: Condens. Matter Mater. Phys.,2005,71,,140301-1	Pn-3m	3D	2	A*B2)2	dia Diamond; 4/6/c1; sqc6	tetrahedron	|Zn|	|2|	|4|	|C4|	2	Ia
413108	Cd(CN)2	Cadmium Cyanide.	Goodwin A.L.,Kepert C.J.	Phys. Rev. B: Condens. Matter Mater. Phys.,2005,71,,140301-1	Pn-3m	3D	2	A*B2)2	dia Diamond; 4/6/c1; sqc6	tetrahedron	|Cd|	|2|	|4|	|C4|	2	Ia
413110	(Zn0.8Cd0.2)(CN)2	Zinc Cadmium Cyanide (0.8/0.2/2).	Goodwin A.L.,Kepert C.J.	Phys. Rev. B: Condens. Matter Mater. Phys.,2005,71,,140301-1	Pn-3m	3D	2	A*B2)2	dia Diamond; 4/6/c1; sqc6	tetrahedron	|Zn|Cd|	|2|	|4|	|C4|	2	Ia
413898	K2(Pt(CN)4)	Dipotassium Tetracyanoplatinate.	Muehle C.,Nuss J.,Dinnebier R.E.,Jansen M.	Z. Anorg. Allg. Chem.,2004,630,,1462-1468	Pccn	0D	4	A*M1)4	1,4M5-1	square	|Pt|	|2|	|4|	|C4|	0	-
413899	K2(Pd(CN)4)	Dipotassium Tetracyanopalladate.	Muehle C.,Nuss J.,Dinnebier R.E.,Jansen M.	Z. Anorg. Allg. Chem.,2004,630,,1462-1468	P121/c1	0D	4	A*M1)4	1,4M5-1	square	|Pd|	|2|	|4|	|C4|	0	-
413900	K2(Pd(CN)4)(H2O)0.791/Distance=2.00A(Set #1)	Dipotassium Tetracyanopalladate 0.79-hydrate.	Muehle C.,Nuss J.,Dinnebier R.E.,Jansen M.	Z. Anorg. Allg. Chem.,2004,630,,1462-1468	Pnna	0D	4	A*M1)4	1,4M5-1	square	|Pd|	|2|	|4|	|C4|	0
413901	K2(Pt(CN)4)(H2O)0.713/Distance=2.00A(Set #1)	Dipotassium Tetracyanopalladate 0.71-hydrate.	Muehle C.,Nuss J.,Dinnebier R.E.,Jansen M.	Z. Anorg. Allg. Chem.,2004,630,,1462-1468	Pnna	0D	4	A*M1)4	1,4M5-1	square	|Pt|	|2|	|4|	|C4|	0
414602	Cs5(Ag(CN)2)4I/Distance=3.50A(Set #2)	Pentacesium Tetra(dicyanoargentate) Iodide.	Urban V.,Pretsch T.,Hartl H.	Angew. Chem., Int. Ed.,2005,44,,2794-2797	I-43d	0D	2	A*M1)2	1,2M3-1	linear	|Ag|	|1|	|2|	|C2|	0
415570	K(Ag2Cu(CN)4)	Potassium Disilver(I) Copper(I) Tetracyanide - Phase I.	Chippindale A.M.,Cheyne S.M.,Hibble S.J.	Angew. Chem. Int. ed.,2005,44,48,7942-7946	P12/c1	2D	1.33	A)3*B2)4	sql/Shubnikov tetragonal plane net	tetrahedron & linear	|Cu|Ag|	|1|	|4|2|	|N4|C2|	1	3-FIPN
415571	Rb(Ag2Cu(CN)4)	Rubidium Disilver(I) Copper(I) Tetracyanide - Phase I.	Chippindale A.M.,Cheyne S.M.,Hibble S.J.	Angew. Chem. Int. ed.,2005,44,48,7942-7946	P12/c1	2D	1.33	A)3*B2)4	sql/Shubnikov tetragonal plane net	tetrahedron & linear	|Cu|Ag|	|1|	|4|2|	|N4|C2|	1	3-FIPN
415572	Cs(Ag2Cu(CN)4)	Cesium Disilver(I) Copper(I) Tetracyanide - Phase I.	Chippindale A.M.,Cheyne S.M.,Hibble S.J.	Angew. Chem. Int. ed.,2005,44,48,7942-7946	P12/c1	2D	1.33	A)3*B2)4	sql/Shubnikov tetragonal plane net	tetrahedron & linear	|Cu|Ag|	|1|	|4|2|	|N4|C2|	1	3-FIPN
415573	Rb(Ag2Cu(CN)4)	Rubidium Disilver(I) Copper(I) Tetracyanide - Phase Ii.	Chippindale A.M.,Cheyne S.M.,Hibble S.J.	Angew. Chem. Int. ed.,2005,44,48,7942-7946	Ibca	3D	1.33	A)3*B2)4	4,4T44	tetrahedron & linear	|Cu|Ag|	|1|	|4|2|	|C2N2|CN3|C2|	4	Ia
415574	Cs(Ag2Cu(CN)4)	Cesium Disilver(I) Copper(I) Tetracyanide - Phase Ii.	Chippindale A.M.,Cheyne S.M.,Hibble S.J.	Angew. Chem. Int. ed.,2005,44,48,7942-7946	Ibca	3D	1.33	A)3*B2)4	4,4T44	tetrahedron & linear	|Cu|Ag|	|1|	|4|2|	|C2N2|CN3|C2|	4	Ia
415769	KCu2(CN)3(H2O)/Distance=2.40A(Set #1);Distance=0.00A(Set #1);Distance=0.00A(Set #1);Distance=0.00A(Set #1)	Potassium Dicopper(I) Tricyanide Hydrate.	Pohl A.H.,Chippindale A.M.,Hibble S.J.	Solid State Sci.,2006,8,,379-387	C1c1	2D	1.5	A)2*B2)3	hcb; Shubnikov hexagonal plane net/(6,3)	triangular	|Cu|	|1|	|3|	|CN2|C2N|	1
415770	K2Cu3(CN)5	Dipotassium Tricopper(I) Pentacyanide.	Pohl A.H.,Chippindale A.M.,Hibble S.J.	SOLID STATE SCIENCES,2006,8,3-4,379-387	C12/c1	2D	1.67	A)3*B2)4*M1	hcb; Shubnikov hexagonal plane net/(6,3)	triangular	|Cu|	|1|	|3|	|CN2|C2N|	1	-
415771	CsCu3(CN)4	Cesium Tricopper(I) Tetracyanide.	Pohl A.H.,Chippindale A.M.,Hibble S.J.	Solid State Sci.,2006,8,,379-387	P121/n1	2D	1.33	A)3*B2)4	hcb; Shubnikov hexagonal plane net/(6,3)	triangular & linear	|Cu|	|1|	|2|3|	|C2|C2N|CN2|	1	2-FIPN
415772	KCu3(CN)4	Potassium Tricopper(I) Tetracyanide.	Pohl A.H.,Chippindale A.M.,Hibble S.J.	Solid State Sci.,2006,8,,379-387	Ibca	3D	1.33	A)3*B2)4	4,4T44	tetrahedron & linear	|Cu|	|1|	|4|2|	|C2N2|N4|C2|CN|	4	Ia
416740	Zn3(Co(CN)6)2	Trizinc Bis(hexacyanocobaltate).	Roque J.,Reguera E.,Balmaseda J.,Rodriguez-Hernandez,Reguera L.,Del CASTILLO L.F.	Microporous and Mesoporous Materials,2007,103,,57-71	R-3c	3D	2.4	A)5*B2)12	cor/corundum, Al2O3	octahedron & tetrahedron	|Co|Zn|	|3|2|	|6|4|	|C6|N4|	1	-
417330	BaK0.8(NH4)0.2(Fe(CN)6)(H2O)4/Distance=2.00A(Set #1)	Barium Potassium Ammonium Hexacyanoferrate(III) Hydrate(1/0.8/0.2/1/4).	Zhilov V.I.,Ilyukhin A.B.,Kotov V.Yu.,Kuz'minova Z.V.,Tsirlina G.A.	Zh. Neorg. Khim.,2002,47,,1728-1731	P63/m	0D	6	A*M1)6	1,6M7-1	octahedron	|Fe|	|3|	|6|	|C6|	0
417821	Cd2(Os(CN)6)	Dicadmium Hexacyanoosmate(II).	Rodriguez Hernandez J.,Gomez A.,Reguera E.	Journal of Physics D, Applied Physics,2007,40,,6076-6082	P-3	3D	2	A*B3)2	3,6,6T20	octahedron	|Cd|Os|	|2|	|6|	|N6|C6|	1	-
417822	Cd2(Ru(CN)6)	Dicadmium Hexacyanoruthenate(II).	Rodriguez-Hernandez J.,Gomez A.,Reguera E.	Journal of Physics D: Applied Physics,2007,40,,6076-6082	P-3	3D	2	A*B3)2	3,6,6T20	octahedron	|Ru|Cd|	|2|	|6|	|C6|N6|	1	-
417824	Mn2(Fe(CN)6)	Dimanganese Hexacyanoferrate(II).	Rodriguez-Hernandez J.,Gomez A.,Reguera E.	Journal of Physics D: Applied Physics,2007,40,,6076-6082	P-3	3D	2	A*B3)2	3,6,6T20	octahedron	|Mn|Fe|	|2|	|6|	|N6|C6|	1	-
418911	Cs2(Pt(CN)4)(H2O2)/Distance=2.00A(Set #1)	Dicesium Tetracyanoplatinate Hydrogen Peroxide.	Muehle C.,Peters E.M.,Jansen M.	Zeitschrift fuer Naturforschung, Teil B. Anorganische Chemie, Organische Chemie (42,1987-),2009,64,1,111-115	C12/c1	0D	4	A*M1)4	1,4M5-1	square	|Pt|	|2|	|4|	|C4|	0
418912	Rb2(Pt(CN)4)(H2O2)/Distance=2.00A(Set #1)	Dirubidium Tetracyanoplatinate Hydrogen Peroxide.	Muehle C.,Peters E.M.,Jansen M.	Zeitschrift fuer Naturforschung, Teil B. Anorganische Chemie, Organische Chemie (42,1987-),2009,64,,111-115	C12/c1	0D	4	A*M1)4	1,4M5-1	square	|Pt|	|2|	|4|	|C4|	0
418913	K2(Pt(CN)4)(H2O2)/Distance=2.00A(Set #1)	Dipotassium Tetracyanoplatinate Hydrogen Peroxide.	Muehle C.,Peters E.M.,Jansen M.	Zeitschrift fuer Naturforschung, Teil B. Anorganische Chemie, Organische Chemie (42,1987-),2009,64,,111-115	C12/c1	0D	4	A*M1)4	1,4M5-1	square	|Pt|	|2|	|4|	|C4|	0
423299	Ba3(Co(CN)(CN)2)	Tribarium Monopercyano Dicyano Cobaltate.	Hoehn P.,Jach F.,Karabiyik B.,Prots' YU.,Agrestini S.,Wagner F.R.,Ruck M.,Tjeng LIUHAO,Kniep R.	Angew. Chem. Int. ed.,2011,50,40,9361-9364	P63/m	0D	3	A*M1)3	1,3M4-1	triangular	|Co|	|-1|	|3|	|C3|	0	-
423302	Sr3(Co(CN)(CN)2)	Tristrontium Monopercyano Dicyano Cobaltate.	Hoehn P.,Jach F.,Karabiyik B.,Prots' YU.,Agrestini S.,Wagner F.R.,Ruck M.,Tjeng LIUHAO,Kniep R.	Angew. Chem. Int. ed.,2011,50,40,9361-9364	P63/m	0D	3	A*M1)3	1,3M4-1	triangular	|Co|	|-1|	|3|	|C3|	0	-
424762	Ba3(Ir(CN)3)	Tribarium Dicyano Monopercyano Iridate(III).	Jach F.,Hoehn P.,Senyshyn A.,Ruck M.,Kniep R.	Zeitschrift fuer Anorganische und Allgemeine Chemie,2012,638,12-13,1959-1961	P63/m	0D	3	A*M1)3	1,3M4-1	triangular	|Ir|	|-1|	|3|	|C3|	0	-
ACIKEE	C18 H31 Mo1 N12 O1.5	1,4,8,11-Tetraazoniacyclotetradecane octacyano-molybdenum(iv) sesquihydrate.	B.Nowicka,M.Reczynski,W.Nitek,B.Sieklucka	POLYHEDRON,2012,47,,73	I41/a	0D	8	A*M1)8	1,8M9-1	square antiprism	|Mo|	|4|	|8|	|C8|	0	-
ACIKII	C36 H70 N24 O8 W2	1,4,8,11-Tetraazoniacyclotetradecane 1,8-diaza-4,11-di-azoniacyclotetradecanebis(octacyano-tungsten(v)) octahydrate.	B.Nowicka,M.Reczynski,W.Nitek,B.Sieklucka	POLYHEDRON,2012,47,,73	P-1	0D	8	A*M1)8	1,8M9-1	square antiprism	|W|	|5|	|8|	|C8|	0	-
ACIKOO	C18 H36 Cl1 N12 O4 W1	1,4,8,11-Tetraazoniacyclotetradecane octacyano-tungsten(v) chloridetetrahydrate.	B.Nowicka,M.Reczynski,W.Nitek,B.Sieklucka	POLYHEDRON,2012,47,,73	P-1	0D	8	A*M1)8	1,8M9-1	square antiprism	|W|	|5|	|8|	|C8|	0	-
ACIKUU	C44 H78 N24 O4 W2	1,4,8,11-Tetramethyl-1,8-diaza-4,11-di-azoniacyclotetradecane1,4,8,11-tetramethyl-1,4,8,11-tetraazoniacyclotetradecanebis(octacyano-tungsten(v)) tetrahydrate.	B.Nowicka,M.Reczynski,W.Nitek,B.Sieklucka	POLYHEDRON,2012,47,,73	P21/c	0D	8	A*M1)8	1,8M9-1	square antiprism	|W|	|5|	|8|	|C8|	0	-
AKAMOO	C46 H32 Fe1 N6 S16 Se16	tetrakis(bis(ethylenediseleno)tetrathiafulvalene) hexacyanoferrate(iii).	M.Clemente-Leon,E.Coronado,J.R.Galan-Mascaros,C.Gimenez-Saiz,C.J.Gomez-Garcia,J.M.Fabre,G.A.Mousdis,G.C.Papavassiliou	J.SOLID STATE CHEM.,2002,168,,616	P-1	0D	6	A*M1)6	1,6M7-1	octahedron	|Fe|	|3|	|6|	|C6|	0	-
AKAMUU	C21 H13 Fe1 N6 O0.5 S6 Se6/Distance=2.00A(Set #1)	tetrakis(bis(ethylenediseleno)tetrathiafulvalene) hexacyanoferrate(iii)hemihydrate.	M.Clemente-Leon,E.Coronado,J.R.Galan-Mascaros,C.Gimenez-Saiz,C.J.Gomez-Garcia,J.M.Fabre,G.A.Mousdis,G.C.Papavassiliou	J.SOLID STATE CHEM.,2002,168,,616	P-1	0D	6	A*M1)6	1,6M7-1	octahedron	|Fe|	|3|	|6|	|C6|	0
AKANAB	C25 H16 Fe1 N6 O1 S8 Se8/Distance=2.00A(Set #2)	bis(bis(ethylenediseleno)tetrathiafulvalene) nitrosyl-pentacyanoferrate(iii).	M.Clemente-Leon,E.Coronado,J.R.Galan-Mascaros,C.Gimenez-Saiz,C.J.Gomez-Garcia,J.M.Fabre,G.A.Mousdis,G.C.Papavassiliou	J.SOLID STATE CHEM.,2002,168,,616	P-1	0D	6	A*M1)6	1,6M7-1	octahedron	|Fe|	|3|	|6|	|C6|	0
AKONOE	C29 H37 Cu1 N4	1,3-bis(2,6-Di-isopropylphenyl)-1H-imidazol-3-ium dicyanocuprate.	G.C.Fortman,A.M.Z.Slawin,S.P.Nolan	Organometallics,2010,29,,3966	P21/c	0D	2	A*M1)2	1,2M3-1	linear	|Cu|	|1|	|2|	|C2|	0	-
AMUXUC	C30 H44 Ag2 N8	2,2'-(1,4-Phenylene)-bis(5,5-dipropyl-3,4,5,6-tetrahydropyrimidin-1-ium)bis(dicyano-silver).	Dechambenoit P.,Ferlay S.,Kyritsakas N.,Hosseini M.W.	CRYSTENGCOMM,2011,13,,1922	P21/c	0D	2	A*M1)2	1,2M3-1	linear	|Ag|	|1|	|2|	|C2|	0	-
AMUXUC01	(C26H44N4)(Ag2(CN)4)	2,2'-(1,4-Phenylene)-bis(5,5-dipropyl-3,4,5,6-tetrahydropyrimidin-1-ium)bis(dicyano-silver).	Dechambenoit P.,Ferlay S.,Kyritsakas N.,Hosseini M.W.	CRYSTENGCOMM,2011,13,,1922	P-1	0D	2	A*M1)2	1,2M3-1	linear	|Ag|	|1|	|2|	|C2|	0	-
AMUYAJ	C42 H68 Ag2 N8	2,2'-(1,4-Phenylene)-bis(5,5-dihexyl-3,4,5,6-tetrahydropyrimidin-1-ium)bis(dicyano-silver).	P.Dechambenoit,S.Ferlay,N.Kyritsakas,M.W.Hosseini	CRYSTENGCOMM,2011,13,,1922	P-1	0D	2	A*M1)2	1,2M3-1	linear	|Ag|	|1|	|2|	|C2|	0	-
AMUYEN	C66 H116 Au2 N8	2,2'-(1,4-Phenylene)-bis(5,5-didodecyl-3,4,5,6-tetrahydropyrimidin-1-ium)bis(dicyano-gold).	P.Dechambenoit,S.Ferlay,N.Kyritsakas,M.W.Hosseini	CRYSTENGCOMM,2011,13,,1922	P21/n	0D	2	A*M1)2	1,2M3-1	linear	|Au|	|1|	|2|	|C2|	0	-
AMUYIR	C42 H68 Au2 N8	2,2'-(1,4-Phenylene)-bis(5,5-dihexyl-3,4,5,6-tetrahydropyrimidin-1-ium)bis(dicyano-gold).	P.Dechambenoit,S.Ferlay,N.Kyritsakas,M.W.Hosseini	CRYSTENGCOMM,2011,13,,1922	P-1	0D	2	A*M1)2	1,2M3-1	linear	|Au|	|1|	|2|	|C2|	0	-
AMUYOX	C66 H116 Ag2 N8/Distance=0.00A(Set #1);Distance=0.00A(Set #1);Distance=2.40A(Set #1);Distance=0.00A(Set #1)	2,2'-(1,4-Phenylene)-bis(5,5-didodecyl-3,4,5,6-tetrahydropyrimidin-1-ium)bis(dicyano-silver).	P.Dechambenoit,S.Ferlay,N.Kyritsakas,M.W.Hosseini	CRYSTENGCOMM,2011,13,,1922	P-1	0D	2	A*M1)2	1,2M3-1	linear	|Ag|	|1|	|2|	|C2|	0
ANEGEG	C7.98 H1 Fe1.33 N8.98 O4 Tl6/Distance=2.00A(Set #1)	Hexa-thallium hexacyano-iron(iii) hydroxide nitrate.	N.Singh,K.Diwan,M.G.B.Drew	POLYHEDRON,2010,29,,3192	R-3c	0D	6	A*M1)6	1,6M7-1	octahedron	|Fe|	|3|	|6|	|C6|	0
ANILPC	C16 H16 N6 Pt1	Dianilinium tetracyanoplatinum(ii).	G.F.Needham,P.L.Johnson,J.M.Williams	ACTA CRYSTALLOGR.,SECT.B:STRUCT.CRYSTALLOGR.CRYST.CHEM.,1977,33,,1581	P-1	0D	4	A*M1)4	1,4M5-1	square	|Pt|	|2|	|4|	|C4|	0	-
ASAZAW	C13 H20 Ag1 Cl1 N4	2-Chloro-1,3-diisopropyl-4,5-dimethyl-1H-imidazol-3-ium(cyano)-(isocyano)-silver.	E.Mallah,Q.Abu-Salem,K.Sweidan,N.Kuhn,C.Maichle-Mossmer,M.Steimann,M.Strobele,M.Walker	Z.NATURFORSCH.,B:CHEM.SCI.,2011,66,,545	Pmn21	0D	2	A*M1)2	1,2M3-1	linear	|Ag|	|1|	|2|	|CN|	0	-
ASAZEA	C14 H20 Ag1 N5	2-Cyano-1,3-diisopropyl-4,5-dimethyl-1H-imidazol-3-ium dicyano-silver.	E.Mallah,Q.Abu-Salem,K.Sweidan,N.Kuhn,C.Maichle-Mossmer,M.Steimann,M.Strobele,M.Walker	Z.NATURFORSCH.,B:CHEM.SCI.,2011,66,,545	Pmcn	0D	2	A*M1)2	1,2M3-1	linear	|Ag|	|1|	|2|	|C2|	0	-
AWELUJ	C28 H48 N6 Ni1	bis(Dicyclohexylammonium) tetracyano-nickel(ii).	Sock-Sung Yun,Hyoung-Sil Moon,Chong-Hyeak Kim,Sueg-Geun Lee	J.Coord.Chem.,2004,57,,17	P1	0D	4	A*M1)4	1,4M5-1	square	|Ni|	|2|	|4|	|C4|	0	-
AXODAT	C11.2 H11.2 Co1 N10 W1/Distance=2.20A(Set #2)	catena-(tetraethylenepentaammoniumtetrakis(\m~2~-cyanido)-tetracyanido-cobalt(ii)-tungsten(iv)).	R.Podgajny,S.Chorazy,W.Nitek,A.Budziak,M.Rams,C.J.Gomez-Garcia,M.Oszajca,W.Lasocha,B.Sieklucka	CRYST.GROWTH DES.,2011,11,,3866	Cmcm	2D	4	A*B2)2*M1)2	sql/Shubnikov tetragonal plane net	square antiprism & tetrahedron	|Co|W|	|2|4|	|4|8|	|N4|C8|	1
AXODEX	C12.6 H16.8 Co1 N10 O1.4 W1/Distance=2.20A(Set #2)	catena-(tetraethylenepentaammoniumtetrakis(\m~2~-cyanido)-tetracyanido-cobalt(ii)-tungsten(iv) methanolsolvate).	Podgajny R.,Chorazy S.,Nitek W.,Budziak A.,Rams M.,Gomez-Garcia C.J.,Oszajca M.,Lasocha W.,Sieklucka B.	CRYST.GROWTH DES.,2011,11,,3866	Cmcm	2D	4	A*B2)2*M1)2	sql/Shubnikov tetragonal plane net	square antiprism & tetrahedron	|Co|W|	|2|4|	|4|8|	|N4|C8|	1
BAPXUL	C19 H26 K1 N3 O7 Zn1/Distance=2.10A(Set #1)	catena-(bis(\m~2~-Cyano)-aqua-(2,3-benzo-1,4,7,10,13,16-hexaoxacyclo-octadec-2-ene)-dicyano-potassium-zinc(ii)).	J.Pickardt,P.Wischlinski	Z.NATURFORSCH.,B:CHEM.SCI.,1999,54,,747	P-1	1D	3	A*B2*M1)2	2C1	tetrahedron	|Zn|	|2|	|4|	|C4|	1
BAQBIE	C20 H14 Au1 N2 S12/Distance=2.00A(Set #1)	1,2-bis(3',4'-(Ethylendithio)tetrathiafulvalen-3-yl)ethane dicyano-gold(i).	M.Fourmigue,C.Meziere,E.Canadell,D.Zitoun,K.Bechgaard,P.Auban-Senzier	ADV.MATER.,1999,11,,766	P-1	0D	2	A*M1)2	1,2M3-1	linear	|Au|	|1|	|2|	|C2|	0
BEMKEJ10	C18 H19 Cd1 N5 Ni1 O1/Distance=2.40A(Set #2)	(2-Aminoethanol)-(tetracyano-nickel(ii))-cadmium(ii) benzene clathrate.	S.Nishikiori,T.Iwamoto	BULL.CHEM.SOC.JPN.,1983,56,,3246	P4/mmm	2D	2	A*B2)2	sql/Shubnikov tetragonal plane net	tetrahedron & square	|Ni|Cd|	|2|	|4|	|C4|N4|	1
BIFZOG	C114 H92 Mn1 N9 O1 P6/Distance=2.10A(Set #1)	tris(bis(triphenylphosphino)iminium) hexacyano-manganese monohydrate.	M.D.Ward	PRIVATE COMMUNICATION,2003,,,	Pbcn	0D	6	A*M1)6	1,6M7-1	octahedron	|Mn|	|3|	|6|	|C6|	0
BIGFUT	C8 H14 Cu4 N8 O2	catena-((Ethane-1,2-diammonium) hexakis(\m~2~-cyano)-tetra-copper(i)dihydrate).	Pretsch T.,Hartl H.	Z.ANORG.ALLG.CHEM.,2004,630,,1581	P21/c	2D	1.5	A)2*B2)3	hcb; Shubnikov hexagonal plane net/(6,3)	triangular	|Cu|	|1|	|3|	|CN2|C2N|	1	-
BIGGAA	C9 H14 Cu4 N8 O1	catena-((Propane-1,3-diammonium) hexakis(\m~2~-cyano)-tetra-copper(i)monohydrate).	Pretsch T.,Hartl H.	Z.ANORG.ALLG.CHEM.,2004,630,,1581	C2221	2D	1.5	A)2*B2)3	hcb; Shubnikov hexagonal plane net/(6,3)	triangular	|Cu|	|1|	|3|	|CN2|C2N|	1	-
BIGGEE	C10 H18 Cu4 N8 O2/Distance=2.00A(Set #1)	catena-((Butane-1,4-diammonium) hexakis(\m~2~-cyano)-tetra-copper(i)dihydrate).	T.Pretsch,H.Hartl	Z.ANORG.ALLG.CHEM.,2004,630,,1581	Pnn2	2D	1.5	A)2*B2)3	hcb; Shubnikov hexagonal plane net/(6,3)	triangular	|Cu|	|1|	|3|	|CN2|C2N|	1
BIGGII	C29 H54 Cu8 N20 O3	catena-(tris(Pentane-1,5-diammonium)tetrakis(\m~3~-cyano)-decakis(\m~2~-cyano)-octa-copper(i) trihydrate).	Pretsch T.,Hartl H.	Z.ANORG.ALLG.CHEM.,2004,630,,1581	P1	3D	1.75	A)4*B3)2*B2)5	3,3,4,4,4,4T10	tetrahedron	|Cu|	|1|	|4|	|CN3|C2N2|C4|C3N|	1	-
BOFROE	C28 H27 Mo1 N16 O4	4,4'-Diazenediyldipyridinium (4-pyridyldiazenyl)pyridiniumoctacyanidomolybdate(v) tetrahydrate.	Wen-Yan LIU,Hu ZHOU,Ai-Hua YUAN	ACTA CRYSTALLOGR.,SECT.E:STRUCT.REP.ONLINE,2008,64,,m1151	Ccca	0D	8	A*M1)8	1,8M9-1	square antiprism	|Mo|	|5|	|8|	|C8|	0	-
BUJKEW01	C14 H24 Fe1 N8 Rb1/Distance=2.00A(Set #1)	catena-(bis(Tetramethylammonium) hexakis(\m~2~-cyano)-iron(iii)-rubidium).	M.Schwarten,B.Ziegler,M.Witzel,D.Babel	Z.NATURFORSCH.,B:CHEM.SCI.,1997,52,,391	R-3m	0D	6	A*M1)6	1,6M7-1	octahedron	|Fe|	|3|	|6|	|C6|	0
BUJKOG10	C14 H26 Fe1 N8 Na1 O1/Distance=2.00A(Set #1)	bis(Tetramethylammonium) sodium hexacyano-iron monohydrate.	M.Witzel,D.Babel	Z.NATURFORSCH.,B:CHEM.SCI.,1984,39,,201	Pnma	0D	6	A*M1)6	1,6M7-1	octahedron	|Fe|	|3|	|6|	|C6|	0
BUMJIC	C18 H36 Cu1 N3/Distance=2.00A(Set #1)	catena-(Tetra-n-butylammonium (\m~2~-cyano)-cyano--copper(i)).	M.Asplund,S.Jagner,M.Nilsson	ACTA CHEM.SCAND.A,1983,37,,165	P-1	1D	2	A*B2*M1	2C1	triangular	|Cu|	|1|	|3|	|C3|	1
BUPJEC01	C50 H68 Fe1 N18 O36/Distance=2.00A(Set #1)	bis(1,1'-bis(2,4-dinitrophenyl)-4,4'-bipyridinium) radical hexacyano-iron(ii)icosahydrate.	A.S.Abouelwafa,V.Mereacre,T.S.Balaban,C.E.Anson,A.K.Powell	CRYSTENGCOMM,2010,12,,94	Ibam	0D	6	A*M1)6	1,6M7-1	octahedron	|Fe|	|2|	|6|	|C6|	0
BUTMOC	C56 H108 Mo1 N11/Distance=2.20A(Set #1)	tris(Tetra-n-butylammonium) octacyanomolybdate(v).	B.J.Corden,J.A.Cunningham,R.Eisenberg	INORG.CHEM.,1970,9,,356	P4/ncc	0D	8	A*M1)8	1,8M9-1	trigonal dodecahedron	|Mo|	|5|	|8|	|C8|	0
BUXXEY	C21 H34 Fe1 N10 O1/Distance=2.00A(Set #2)	(5,7,7,12,14,14-Hexamethyl-4,11-diaza-1,8-diazonia-cyclotetradeca-4,11-diene)pentacyano(nitrosyl)-iron.	Jian-Hong Bi,Wen-Tao Bi,Zi-Xian Huang,Nai-Liang Hu	ASIAN J.CHEM.,2009,21,,6619	P-1	0D	6	A*M1)6	1,6M7-1	octahedron	|Fe|	|3|	|6|	|C6|	0
CAQWAS	C26 H32 Ag1 Cs1 N2 O8/Distance=2.10A(Set #1)	catena-(bis(\m~2~-Cyano)-(dibenzo-24-crown-8)-cesium).	J.A.Rusanova,P.J.Squattrito,V.V.Ponomareva,K.V.Domasevitch,V.N.Kokozay	Z.NATURFORSCH.,B:CHEM.SCI.,1999,54,,1129	P21/a	0D	2	A*M1)2	1,2M3-1	linear	|Ag|	|1|	|2|	|C2|	0
CARGEI	C22 H6 Ag12 Cs6 N20/Distance=0.00A(Set #1);Distance=0.00A(Set #1);Distance=2.40A(Set #1);Distance=0.00A(Set #1)	catena-(Hexa-cesium dodecakis(\m~2~-cyano-C,N)-tetracyano-undeca-silver(i)dicyano-silver(i) acetonitrile solvate).	Urban V.,Pretsch T.,Hartl H.	Angew.Chem.,Int.Ed.,2005,44,,2794	Fddd	0D|2D	1.5	A)2*B2)2*M1	1,2M3-1|sql/Shubnikov tetragonal plane net	tetrahedron & linear	|Ag|	|1|	|4|2|	|N4|C2|	1
CEHTEP	C16 H24 Ag6 N10/Distance=3.50A(Set #4)	catena-(bis(Tetramethylammonium) octakis(\m~2~-cyano)-hexa-silver(i)).	Xi LIU,Guo-Cong GUO,Ming-Lai FU,Xue-Hui LIU,Ming-Sheng WANG,Jin-Shun HUANG	INORG.CHEM.,2006,45,,3679	P21/c	3D	1.33	A)3*B2)4	ths ThSi2; 3/10/t4	triangular & linear	|Ag|	|1|	|3|2|	|N3|C2N|C2|	3	3*1
CEXTUW	C17 H16 Cu3 N9/Distance=2.30A(Set #2)	catena-[2,2'-(1,4-Phenylene)bis(4,5-dihydro-1H-3\l^5^-imidazole)(\m~3~-cyano)-tris(\m~2~-cyano)-cyano-tri-copper].	Ferlay S.,Dechambenoit P.,Kyritsakas N.,Hosseini M.W.	DALTON TRANS.,2013,42,,11661	P21/c	3D	1.67	A)3*B3*B2)4	3,3,4,4T80	tetrahedron & triangular	|Cu|	|1|	|3|4|	|C3|C4|C3N|	1
CEXVAE	C16 H24 Cu4 N10 O2/Distance=2.40A(Set #1);Distance=0.00A(Set #1);Distance=0.00A(Set #1);Distance=0.00A(Set #1)	catena-[2,2'-ethane-1,2-diylbis(3,4,5,6-tetrahydropyrimidin-1-ium)bis(\m~3~-cyano)-bis(\m~2~-cyano)-dicyano-tetra-copper dihydrate].	Ferlay S.,Dechambenoit P.,Kyritsakas N.,Hosseini M.W.	DALTON TRANS.,2013,42,,11661	Pbcn	3D	1.5	A)2*B3*B2)2	3,3,4T101	tetrahedron & triangular	|Cu|	|1|	|3|4|	|C3|C4|	1
CEXVEI	C14 H20 Cu2 N8/Distance=2.10A(Set #1)	catena-(2,2'-Ethane-1,2-diylbis(3,4,5,6-tetrahydropyrimidin-1-ium)tetrakis(\m~2~-cyano-C,N)-di-copper).	S.Ferlay,P.Dechambenoit,N.Kyritsakas,M.W.Hosseini	DALTON TRANS.,2013,42,,11661	P21/n	3D	2	A*B2)2	dia Diamond; 4/6/c1; sqc6	tetrahedron	|Cu|	|1|	|4|	|C3N|	1
CEXVIM	C12 H12 Cu2 N8/Distance=2.40A(Set #1);Distance=0.00A(Set #1);Distance=0.00A(Set #1);Distance=0.00A(Set #1)	catena-(1,4-Phenylenebis(aminomethaniminium)bis(\m~2~-cyano-C,C)-bis(\m~2~-cyano-C,N)-di-copper).	S.Ferlay,P.Dechambenoit,N.Kyritsakas,M.W.Hosseini	DALTON TRANS.,2013,42,,11661	P-1	2D	2	A*B2*M2	hcb; Shubnikov hexagonal plane net/(6,3)	tetrahedron	|Cu|	|1|	|4|	|C4|	1
CEXVOS	C22 H20 Cu6 N12 O2/Distance=2.00A(Set #1)	catena-(2,2'-(Benzene-1,4-diyl)bis(5-hydroxy-3,4,5,6-tetrahydropyrimidin-1-ium) bis(tetrakis(\m~2~-cyano-C,N)-tri-copper)).	S.Ferlay,P.Dechambenoit,N.Kyritsakas,M.W.Hosseini	DALTON TRANS.,2013,42,,11661	P-1	2D	1.33	A)3*B2)4	hcb; Shubnikov hexagonal plane net/(6,3)	triangular & linear	|Cu|	|1|	|3|2|	|C3|C2|	1
CEXVUY	C34 H52 Cu4 N10 O2/Distance=2.00A(Set #1)	catena-(2,2'-(1,4-Phenylene)bis(5,5-dipropyl-1,4,5,6-tetrahydropyrimidinium)bis(tris(\m~2~-cyano-C,N)-di-copper) methanol solvate).	S.Ferlay,P.Dechambenoit,N.Kyritsakas,M.W.Hosseini	DALTON TRANS.,2013,42,,11661	P-1	2D	1.5	A)2*B2)3	hcb; Shubnikov hexagonal plane net/(6,3)	triangular	|Cu|	|1|	|3|	|C3|	1
CEXWAF	(C14H20N4)(Cu2(CN)4)	catena-(2,2'-(1,4-Phenylene)bis-3,4,5,6-tetrahydropyrimidin-1-iumbis((\m~2~-cyano-C,N)-cyano-copper)).	Ferlay S.,Dechambenoit P.,Kyritsakas N.,Hosseini M.W.	DALTON TRANS.,2013,42,,11661	P21/c	1D	2	A*B2*M1	2C1	triangular	|Cu|	|1|	|3|	|C2N|	0	-
CICWER	C22 H50 Fe1 N9 O3/Distance=2.00A(Set #1)	Ammonium bis(tetraethylammonium) hexacyano-iron(iii) trihydrate.	M.M.Malarova,J.Cernak,W.Massa	ACTA CRYSTALLOGR.,SECT.C:CRYST.STRUCT.COMMUN.,2007,63,,m187	P21/n	0D	6	A*M1)6	1,6M7-1	octahedron	|Fe|	|3|	|6|	|C6|	0
CIKYUR	C28 H26 Au1 N4 O5 Se8/Distance=2.80A(Set #2)	\k~L~-bis(4,5-Dimethyl-4',5'-(ethylenedioxy)-1,1',3,3'-tetraselenafulvalene)tetracyano-gold 2,5-dihydrofuran solvate.	T.Shirahata,M.Kibune,H.Yoshino,T.Imakubo	Chem.-Eur.J.,2007,13,,7619	Pnma	0D	4	A*M1)4	1,4M5-1	square	|Au|	|3|	|4|	|C4|	0
CIKZAY	C29 H28 Au1 N4 O5 Se8/Distance=2.00A(Set #1)	\k~L~-bis(4,5-Dimethyl-4',5'-(ethylenedioxy)-1,1',3,3'-tetraselenafulvalene)tetracyano-gold 3,4-dihydro-2H-pyran solvate.	T.Shirahata,M.Kibune,H.Yoshino,T.Imakubo	Chem.-Eur.J.,2007,13,,7619	Pnma	0D	4	A*M1)4	1,4M5-1	square	|Au|	|3|	|4|	|C4|	0
CIWJOH01	C18 H33 Fe1 K3 N14 O4.5/Distance=2.00A(Set #1)	Tripotassium hexamethylenetetramine hexacyano-iron(iii) hydrate.	R.E.Marsh	ACTA CRYSTALLOGR.,SECT.B:STRUCT.SCI.,1995,51,,897	C2/c	0D	6	A*M1)6	1,6M7-1	octahedron	|Fe|	|3|	|6|	|C6|	0
CIWJOH10	C18 H33 Fe1 K3 N14 O4.5/Distance=2.00A(Set #1)	Tripotassium hexamethylenetetramine hexacyano-iron(iii) hydrate.	H.-J.Meyer,J.Pickardt	Z.NATURFORSCH.,B:CHEM.SCI.,1988,43,,1161	P-1	0D	6	A*M1)6	1,6M7-1	octahedron	|Fe|	|3|	|6|	|C6|	0
CIXQEG	C20 H42 Au2 N8 O2	5,7,7,12,14,14-Hexamethyl-4,11-diaza-1,8-diazoniocyclotetradecanetetracyano-di-gold dihydrate.	Jie QU,Wen GU,Xin LIU	J.Coord.Chem.,2008,61,,618	P21/c	0D	2	A*M1)2	1,2M3-1	linear	|Au|	|1|	|2|	|C2|	0	-
CIYJEZ	C88 H88 Co1 N10 O4 P4/Distance=1.90A(Set #1)	bis(bis(Triphenylphosphine)-iminium) tetracyano-cobalt dimethylformamidesolvate.	S.J.Carter,B.M.Foxman,L.S.Stuhl	J.AM.CHEM.SOC.,1984,106,,4265	P21/c	0D	4	A*M1)4	1,4M5-1	square	|Co|	|2|	|4|	|C4|	0
CIYJEZ10	C88 H88 Co1 N10 O4 P4/Distance=1.90A(Set #1)	bis(bis(Triphenylphosphine)-iminium) tetracyano-cobalt dimethylformamidesolvate.	S.J.Carter,B.M.Foxman,L.S.Stuhl	INORG.CHEM.,1986,25,,2888	P21/c	0D	4	A*M1)4	1,4M5-1	square	|Co|	|2|	|4|	|C4|	0
COVHEA	C24 H20 Ba1 Hg1 N8/Distance=2.20A(Set #1)	catena-tetrakis(\m~2~-Cyano)-(tetrakis(pyridine)-barium)-mercury.	K.Brodersen,I.Beck,R.Beck,H.U.Hummel,G.Liehr	Z.ANORG.ALLG.CHEM.,1984,516,,30	I-4	0D	4	A*M1)4	1,4M5-1	tetrahedron	|Hg|	|2|	|4|	|C4|	0
COXCUN	C22 H36 Au1 K1 N2 O6/Distance=2.00A(Set #1)	cis,syn,cis-2,5,8,15,18,21-Hexaoxatricyclo(20.4.0.0^9,14^)hexacosane-potassiumdicyano-gold.	N.F.Krasnova,Yu.A.Simonov,V.K.Bel'skii,V.M.Abashkin,V.V.Yakshin,T.I.Malinovskii,B.N.Laskorin	DOKL.AKAD.NAUK SSSR(RUSS.)(PROC.NAT.ACAD.SCI.USSR),1984,276,,607	P1121/n	0D	2	A*M1)2	1,2M3-1	linear	|Au|	|1|	|2|	|C2|	0
CSCNCA01	C14 H24 Cr1 Cs1 N8/Distance=2.10A(Set #1)	catena-(bis(Tetramethylammonium) hexakis(\m~2~-cyano)-cesium-chromium).	M.Schwarten,D.Babel	Z.ANORG.ALLG.CHEM.,2000,626,,1921	Fm-3m	0D	6	A*M1)6	1,6M7-1	octahedron	|Cr|	|3|	|6|	|C6|	0
CSCNCB10	C14 H24 Cs1 Fe1 N8/Distance=2.00A(Set #1)	bis(Tetramethylammonium) cesium hexacyano-iron(iii).	D.Babel	Z.NATURFORSCH.,B:CHEM.SCI.,1982,37,,1534	Fd3c	0D	6	A*M1)6	1,6M7-1	octahedron	|Fe|	|3|	|6|	|C6|	0
CSCNCC01	(N(CH3)4)2Cs(Co(CN)6)	Cesium tetramethylammonium hexacyano-cobalt(iii).	Morales A.D.,Romero R.G.,Rodriguez J.D.,Hernandez R.P.,Bertran J.F.	TRANSITION MET.CHEM.,1990,15,,106	Fm3m	0D	6	A*M1)6	1,6M7-1	octahedron	|Co|	|3|	|6|	|C6|	0	-
CSCNCC02	(N(CH3)4)2Cs(Co(CN)6)	catena-(bis(Tetramethylammonium) hexakis(\m~2~-cyano)-cesium-cobalt(iii)).	Peschel S.,Babel D.	Z.NATURFORSCH.,B:CHEM.SCI.,1994,49,,1373	I2/m	0D	6	A*M1)6	1,6M7-1	octahedron	|Co|	|3|	|6|	|C6|	0	-
CUBSOI	C24 H41 Mo1 N12 O1	5,7,7,12,14,14-Hexamethyl-11-aza-1,4,8-triazoniacyclotetradecaneoctacyano-molybdenum(v) monohydrate.	Jie Qu,Wen Gu,Xin Liu	J.Chem.Cryst.,2009,39,,320	P21/c	0D	8	A*M1)8	1,8M9-1	square antiprism	|Mo|	|5|	|8|	|C8|	0	-
CYHGTF	C26 H32 Hg5 N10 O4/Distance=0.00A(Set #1);Distance=0.00A(Set #1);Distance=2.40A(Set #1);Distance=0.00A(Set #1)	Dicyano-mercury(ii) tetrahydrofuran solvate.	Frey M.,Ledesert M.	ACTA CRYSTALLOGR.,SECT.B:STRUCT.CRYSTALLOGR.CRYST.CHEM.,1971,27,,2119	P42/mnm	0D	2	A*M1)2	1,2M3-1	linear	|Hg|	|2|	|2|	|C2|	0
DAQKUC	C168 H124 Ba6 F18 Fe2 N36 O26/Distance=2.00A(Set #1)	catena-(tetrakis(\m~2~-Cyano-C,N)-hexakis(\m~2~-trifluoroacetato-O,O')-octa-aqua-octacyano-dodecakis(1,10-phenanthroline-N,N')-hexa-barium-di-ironhexahydrate).	N.K.Karan,B.Samanta,S.Mitra,V.Gramlich	Z.NATURFORSCH.,B:CHEM.SCI.,2005,60,,640	P-1	0D	6	A*M1)6	1,6M7-1	octahedron	|Fe|	|3|	|6|	|C6|	0
DARNER	C26 H22 Au2 N10 O12	1,1'-Bis(2,4-dinitrophenyl)-4,4'-bipyridinium bis(dicyano-gold) tetrahydrate.	A.S.Abouelwafa,C.E.Anson,A.Hauser,H.H.Patterson,F.Baril-Robert,Xiaobo Li,A.K.Powell	INORG.CHEM.,2012,51,,1294	P21/c	0D	2	A*M1)2	1,2M3-1	linear	|Au|	|1|	|2|	|C2|	0	-
DIRWAC	C15 H8 Ag4 N5 S8/Distance=0.00A(Set #1);Distance=0.00A(Set #1);Distance=2.40A(Set #1);Distance=3.40A(Set #1)	catena-(bis(Ethylenedithio)tetrathiafulvalenepentakis(\m~2~-cyano)-tetra-silver).	U.Geiser,H.H.Wang,L.E.Gerdom,M.A.Firestone,L.M.Sowa,J.M.Williams,M.-H.Whangbo	J.AM.CHEM.SOC.,1985,107,,8305	Fddd	2D	1.25	A)4*B2)5	hcb; Shubnikov hexagonal plane net/(6,3)	triangular & linear	|Ag|	|1|	|2|3|	|C2|N2C|	1
DODPUI	C36 H40 Fe1 N15 O5/Distance=2.00A(Set #1)	tris(2-(2-Pyridylamino)pyridinium) hexacyano-iron(iii) pentahydrate.	P.Misra,M.Nayak,P.Lemoine,R.Koner,S.Mohanta	J.Coord.Chem.,2008,61,,1088	P21/n	0D	6	A*M1)6	1,6M7-1	octahedron	|Fe|	|3|	|6|	|C6|	0
DONYUA	C16 H24 Au1 N4 O6 Rb1/Distance=2.10A(Set #1)	(18-Crown-6)-rubidium tetracyano-gold(iii).	J.A.Manskaya,K.V.Domasevitch,V.V.Ponomareva,J.Sieler,V.N.Kokozay	Z.NATURFORSCH.,B:CHEM.SCI.,1998,53,,683	P21/c	0D	4	A*M1)4	1,4M5-1	square	|Au|	|3|	|4|	|C4|	0
DOYSIT	C14 H24 Cr1 K1 N8/Distance=2.10A(Set #1)	catena-(bis(Tetramethylammonium) hexakis(\m~2~-cyano)-chromium-potassium).	M.Schwarten,D.Babel	Z.ANORG.ALLG.CHEM.,2000,626,,1921	C2/c	0D	6	A*M1)6	1,6M7-1	octahedron	|Cr|	|3|	|6|	|C6|	0
DUSBEY	C22 H16 Ag1 N2 S16	bis(bis(Ethylenedithio)-tetrathiafulvalene) dicyano-silver.	M.A.Beno,M.A.Firestone,P.C.W.Leung,L.M.Sowa,H.H.Wang,J.M.Williams,M.-H.Whangbo	Solid State Commun.,1986,57,,735	P2/n	0D	2	A*M1)2	1,2M3-1	linear	|Ag|	|1|	|2|	|C2|	0	-
DUSBEY03	C22 H16 Ag1 N2 S16	bis(bis(Ethylenedithio)tetrathiafulvalene) dicyano-silver.	P.Guionneau,J.Gaultier,M.Rahal,G.Bravic,J.M.Mellado,D.Chasseau,L.Ducasse,M.Kurmoo,P.Day	J.MATER.CHEM.,1995,5,,1639	P2/c	0D	2	A*M1)2	1,2M3-1	linear	|Ag|	|1|	|2|	|C2|	0
DUSBEY04	C22 H16 Ag1 N2 S16	bis(bis(Ethylenedithio)tetrathiafulvalene) dicyano-silver.	P.Guionneau,J.Gaultier,M.Rahal,G.Bravic,J.M.Mellado,D.Chasseau,L.Ducasse,M.Kurmoo,P.Day	J.MATER.CHEM.,1995,5,,1639	P21/c	0D	2	A*M1)2	1,2M3-1	linear	|Ag|	|1|	|2|	|C2|	0	-
DUSBEY07	C22 H16 Ag1 N2 S16	bis(bis(Ethylenedithio)tetrathiafulvalene) dicyano-silver.	P.Guionneau,J.Gaultier,M.Rahal,G.Bravic,J.M.Mellado,D.Chasseau,L.Ducasse,M.Kurmoo,P.Day	J.MATER.CHEM.,1995,5,,1639	P2/c	0D	2	A*M1)2	1,2M3-1	linear	|Ag|	|1|	|2|	|C2|	0	-
DUSBEY08	C22 H16 Ag1 N2 S16	bis(bis(Ethylenedithio)tetrathiafulvalene) dicyano-silver.	Guionneau P.,Gaultier J.,Rahal M.,Bravic G.,Mellado J.M.,Chasseau D.,Ducasse L.,Kurmoo M.,Day P.	J.MATER.CHEM.,1995,5,,1639	P21/c	0D	2	A*M1)2	1,2M3-1	linear	|Ag|	|1|	|2|	|C2|	0	-
DUSBEY09	C22 H16 Ag1 N2 S16	bis(bis(Ethylenedithio)tetrathiafulvalene) dicyano-silver.	M.Kurmoo,P.Day,T.Mitani,H.Kitagawa,H.Shimoda,D.Yoshida,P.Guionneau,Y.Barrans,D.Chasseau,L.Ducasse	BULL.CHEM.SOC.JPN.,1996,69,,1233	C2/c	0D	2	A*M1)2	1,2M3-1	linear	|Ag|	|1|	|2|	|C2|	0	-
DUSBEY11	C22 H16 Ag1 N2 S16	bis(bis(Ethylenedithio)tetrathiafulvalene) dicyano-silver.	Kurmoo M.,Day P.,Stringer A.M.,Howard J.A.K.,Ducasse L.,Pratt F.L.,Singleton J.,Hayes W.	J.MATER.CHEM.,1993,3,,1161	P21212	0D	2	A*M1)2	1,2M3-1	linear	|Ag|	|1|	|2|	|C2|	0	-
DUSBEY12	C22 H16 Ag1 N2 S16	bis(bis(Ethylenedithio)tetrathiafulvalene) dicyano-silver.	M.Kurmoo,P.Day,A.M.Stringer,J.A.K.Howard,L.Ducasse,F.L.Pratt,J.Singleton,W.Hayes	J.MATER.CHEM.,1993,3,,1161	P21/n	0D	2	A*M1)2	1,2M3-1	linear	|Ag|	|1|	|2|	|C2|	0	-
DUSBIC	C22 H16 Au1 N2 S16	bis(bis(Ethylenedithio)-tetrathiafulvalene) dicyano-gold.	M.A.Beno,M.A.Firestone,P.C.W.Leung,L.M.Sowa,H.H.Wang,J.M.Williams,M.-H.Whangbo	Solid State Commun.,1986,57,,735	P2/n	0D	2	A*M1)2	1,2M3-1	linear	|Au|	|1|	|2|	|C2|	0	-
DUSBIC02	C22 H16 Au1 N2 S16	bis(bis(Ethylenedithio)-tetrathiafulvalene) dicyano-gold.	E.Amberger,K.Polborn,H.Fuchs	Angew.Chem.,Int.Ed.,1986,25,,729	P2/n	0D	2	A*M1)2	1,2M3-1	linear	|Au|	|1|	|2|	|C2|	0	-
DUSTOA11	C12 H20 Hg1 Li1 N5/Distance=2.20A(Set #2)	catena-(Tetraethylammonium tetrakis(\m~2~-cyano)-lithium-mercury).	G.Thiele,J.Grossmann,A.W.Purzer	Z.NATURFORSCH.,B:CHEM.SCI.,1986,41,,1346	F-43m	3D	2	A*B2)2	dia Diamond; 4/6/c1; sqc6	tetrahedron	|Li|Hg|	|1|2|	|4|	|N4|C4|	1
DUSVAO10	C12 H20 Hg1 N5 Na1/Distance=2.30A(Set #1)	catena-(Tetraethylammonium tetrakis(\m~2~-cyano)-mercury-sodium).	G.Thiele,J.Grossmann,A.W.Purzer	Z.NATURFORSCH.,B:CHEM.SCI.,1986,41,,1346	F-43m	0D	4	A*M1)4	1,4M5-1	tetrahedron	|Hg|	|2|	|4|	|C4|	0
DUXZIG	C4 N4 Ni1 Zn1/Distance=2.00A(Set #1)	catena-(tetrakis(\m~2~-cyanido)-nickel-zinc).	Ai-Hua Yuan,Run-Qin Lu,Hu Zhou,Ying-Ying Chen,Yi-Zhi Li	CRYSTENGCOMM,2010,12,,1382	P42/mcm	3D	2	A*B2)2	pts PtS, Cooperite; sqc183	tetrahedron & square	|Ni|Zn|	|2|	|4|	|C4|N4|	2	2*1
DUXZIG01	C4 N4 Ni1 Zn1/Distance=2.00A(Set #2)	catena-(tetrakis(\m~2~-Cyano)-nickel(ii)-zinc(ii)).	Xin Chen,Hu Zhou,Ying-Ying Chen,Ai-Hua Yuan	CRYSTENGCOMM,2011,13,,5666	P42/mmc	3D	2	A*B2)2	pts PtS, Cooperite; sqc183	tetrahedron & square	|Ni|Zn|	|2|	|4|	|C4|N4|	1
DUXZOM	C4 N4 Pd1 Zn1/Distance=2.10A(Set #1)	catena-(tetrakis(\m~2~-cyanido)-palladium-zinc).	Ai-Hua Yuan,Run-Qin Lu,Hu Zhou,Ying-Ying Chen,Yi-Zhi Li	CRYSTENGCOMM,2010,12,,1382	P42/mcm	3D	2	A*B2)2	pts PtS, Cooperite; sqc183	tetrahedron & square	|Zn|Pd|	|2|	|4|	|N4|C4|	2	2*1
DUXZUS	C4 N4 Pt1 Zn1/Distance=2.10A(Set #2)	catena-(tetrakis(\m~2~-cyanido)-platinum-zinc).	Ai-Hua Yuan,Run-Qin Lu,Hu Zhou,Ying-Ying Chen,Yi-Zhi Li	CRYSTENGCOMM,2010,12,,1382	P42/mcm	3D	2	A*B2)2	pts PtS, Cooperite; sqc183	tetrahedron & square	|Zn|Pt|	|2|	|4|	|N4|C4|	2	2*1
EATCPD	C12 H24 N6 Pd1	Diethylammonium tetracyanopalladate.	S.Jerome-Lerutte	ACTA CRYSTALLOGR.,SECT.B:STRUCT.CRYSTALLOGR.CRYST.CHEM.,1971,27,,1624	C-1	0D	4	A*M1)4	1,4M5-1	square	|Pd|	|2|	|4|	|C4|	0	-
EBEMEF	NiZn(CN)4*2C2H3N	catena-(tetrakis(\m~2~-Cyano)-nickel(ii)-zinc(ii) acetonitrile solvate).	Xin CHEN,Hu ZHOU,Ying-Ying CHEN,Ai-Hua YUAN	CRYSTENGCOMM,2011,13,,5666	C2/c	3D	2	A*B2)2	pts PtS, Cooperite; sqc183	tetrahedron & square	|Ni|Zn|	|2|	|4|	|C4|N4|	1	-
EDAPEG	Cu2(Cu2(CN)6)*2N(C2H5)3	catena-(bis(\m~3~-cyano)-tetrakis(\m~2~-cyano)-di-copper(i)-di-copper(ii)-bis(triethylamine) solvate).	Wan-Yuan JIAN,Wei LI,Qi-Ying LV,Xin MIN,Yue-Yun LIU,Shu-Zhong ZHAN	Synth.React.Inorg.,Met.-Org.,Nano-Met.Chem.,2012,42,,1375	P21/n	3D	1.5	A)2*B3*B2)2	3,3,4T12	tetrahedron & triangular	|Cu|	|2|1|	|4|3|	|C4|N3|	1	-
EDECOG	(N(C4H9)4)Au3(Ni(CN)6)	catena-(Tetra-n-butylammonium hexakis(\m~2~-cyano-C,N)-tri-gold-nickel(ii)).	Lefebvre J.,Chartrand D.,Leznoff D.B.	POLYHEDRON,2007,26,,2189	I41cd	3D	1.5	A)2*B2)3	bcs; sqc4991	octahedron & linear	|Ni|Au|	|2|1|	|6|2|	|N6|C2|	1	-
EDEDAT	(C36H30NP2)(Au3Ni(CN)6)	catena-(bis(Triphenylphosphine)iminiumhexakis(\m~2~-cyano-C,N)-tri-gold-nickel).	Lefebvre J.,Chartrand D.,Leznoff D.B.	POLYHEDRON,2007,26,,2189	R-3c	3D	1.5	A)2*B2)3	pcu alpha-Po primitive cubic; 6/4/c1; sqc1	octahedron & linear	|Ni|Au|	|2|1|	|6|2|	|N6|C2|	1	-
EIPCYC10	C35 H72 Co1 N8/Distance=2.10A(Set #2)	Diethyl-4-isopropylammonium pentacyano-cobalt(ii).	L.D.Brown,K.N.Raymond	INORG.CHEM.,1975,14,,2590	P21/m	0D	5	A*M1)5	1,5M6-1	square pyramid	|Co|	|2|	|5|	|C5|	0
ELAKAD01	C44 H34 N4 O17 Pd1 S16/Distance=2.00A(Set #1)	tetrakis(bis(ethylenedioxo)tetrathiafulvalene) tetracyano-palladiummonohydrate.	H.Yamochi,T.Kawasaki,G.Saito	Synth.Met.,2003,135,,605	Pbca	0D	4	A*M1)4	1,4M5-1	square	|Pd|	|2|	|4|	|C4|	0
EXONAH	C28 H22 N8 O2 Pt1	bis(1H-1,10-Phenanthrolinium) tetracyano-platinum dihydrate.	M.Stojanovic,N.J.Robinson,T.Ngo,R.E.Sykora	J.Chem.Cryst.,2011,41,,1425	P21/n	0D	4	A*M1)4	1,4M5-1	square	|Pt|	|2|	|4|	|C4|	0	-
EXONEL	C24 H22 N8 O2 Pt1	bis(2H-2,2'-Bipyridinium) tetracyano-platinum dihydrate.	M.Stojanovic,N.J.Robinson,T.Ngo,R.E.Sykora	J.Chem.Cryst.,2011,41,,1425	P21/n	0D	4	A*M1)4	1,4M5-1	square	|Pt|	|2|	|4|	|C4|	0	-
EXONIP	C28 H16 K2 N8 Pt1/Distance=2.00A(Set #1)	catena-[bis(\m~3~-Cyano)-bis(\m~2~-cyano)-bis(1,10-phenanthroline)-platinum-di-potassium].	M.Stojanovic,N.J.Robinson,T.Ngo,R.E.Sykora	J.Chem.Cryst.,2011,41,,1425	P21/c	0D	4	A*M1)4	1,4M5-1	square	|Pt|	|2|	|4|	|C4|	0
EZOYIC	C20 H40 Mn1 N6	bis(Tetraethylammonium) tetracyano-manganese(ii).	Minao Tang,Dongfeng Li,U.P.Mallik,Yuan-Zhu Zhang,R.Clerac,G.T.Yee,Myung-Hwan Whangbo,A.Mungalimane,S.M.Holmes	INORG.CHEM.,2011,50,,5153	C2/c	0D	4	A*M1)4	1,4M5-1	tetrahedron	|Mn|	|2|	|4|	|C4|	0	-
FAZGET	C8 H15 Au1 N6 O1	4-Amino-3,5-diethyl-1,2,4-triazol-4-ium dicyano-gold(i) monohydrate.	Wen Dong,Ya-Qiu Sun,Bin Yu,Hui-Bo Zhou,Hai-Bin Song,Zhan-Quan Liu,Qing-Mei Wang,Dai-Zheng Liao,Zong-Hui Jiang,Shi-Ping Yan,Peng Cheng	New J.Chem.,2004,28,,1347	C2/m	0D	2	A*M1)2	1,2M3-1	linear	|Au|	|1|	|2|	|C2|	0	-
FEJJIN	C32 H78 Cl2 Co2 N22 O10/Distance=2.00A(Set #1)	1,4,7,10,13,16,19,22,25,28-Deca-azacyclotriacontanium bis(hexacyano-cobalt)dichloride decahydrate.	A.Bianchi,E.Garcia-Espana,S.Mangani,M.Micheloni,P.Orioli,P.Paoletti	CHEM.COMMUN.,1987,,,729	P-1	0D	6	A*M1)6	1,6M7-1	octahedron	|Co|	|3|	|6|	|C6|	0
FEZDIY	C8 H14 Cu1 K1 N4 O2/Distance=2.00A(Set #1)	catena-((\m~3~-Cyano-C,N,N)-(\m~2~-cyano)-bis(\m~2~-dimethylformamide-O,O)-copper-potassium).	Shengming Liu,C.E.Plecnik,E.A.Meyers,S.G.Shore	INORG.CHEM.,2005,44,,282	Pbca	1D	2	A*B2*M1	2C1	triangular	|Cu|	|1|	|3|	|C2N|	1
FIRVOR	C18 H40 Co1 K1 N12 O4/Distance=2.00A(Set #1)	Potassium dihydrogen hexacyano-cobalt 1,4,7,10,13,16-hexa-azacyclo-octadecanetetrahydrate.	Ping Zhou,Feng Xue,S.C.F.Au-Yeung,Xiao-ping Xu	ACTA CRYSTALLOGR.,SECT.B:STRUCT.SCI.,1999,55,,389	P-1	0D	6	A*M1)6	1,6M7-1	octahedron	|Co|	|3|	|6|	|C6|	0
FIRWAE	C18 H30 Co1 K1 N10	Potassium dihydrogen hexacyano-cobalt 1,5,9,13-tetra-azacyclo-octadecane.	Ping Zhou,Feng Xue,S.C.F.Au-Yeung,Xiao-ping Xu	ACTA CRYSTALLOGR.,SECT.B:STRUCT.SCI.,1999,55,,389	P21/c	0D	6	A*M1)6	1,6M7-1	octahedron	|Co|	|3|	|6|	|C6|	0	-
FIRZUB	C14 H27 Co1 N10 O2	Trihydrogen hexacyano-cobalt 1,4,7,10-tetra-azacyclododecane dihydrate.	Ping Zhou,Feng Xue,S.C.F.Au-Yeung,Xiao-ping Xu	ACTA CRYSTALLOGR.,SECT.B:STRUCT.SCI.,1999,55,,389	P1	0D	6	A*M1)6	1,6M7-1	octahedron	|Co|	|3|	|6|	|C6|	0	-
FOCCIK	C16 H28 Ba1 N4 O8 Pt1/Distance=2.00A(Set #1)	catena-(bis(\m~2~-cyano)-diaqua-(1,4,7,10,13,16-hexaoxacyclooctadecane)-barium(ii)-platinum(ii)).	M.M.Olmstead,M.A.Lee,J.R.Stork	ACTA CRYSTALLOGR.,SECT.E:STRUCT.REP.ONLINE,2005,61,,m1048	Pbca	0D	4	A*M1)4	1,4M5-1	square	|Pt|	|2|	|4|	|C4|	0
FUCPEY	C44 H52 Hg1 K2 N4 O14/Distance=2.30A(Set #1)	Aqua-(dibenzo(b,k)(1,4,7,10,13,16)hexaoxacyclo-octadeca-2,11-diene)-potassium(dibenzo(b,k)(1,4,7,10,13,16)hexaoxacyclo-octadeca-2,11-diene)-(tetracyano-mercury(ii)-N)-potassium monohydrate.	K.F.Mok,V.McKee,W.T.Robinson	ACTA CRYSTALLOGR.,SECT.C:CRYST.STRUCT.COMMUN.,1987,43,,2093	P-1	0D	4	A*M1)4	1,4M5-1	tetrahedron	|Hg|	|2|	|4|	|C4|	0
FULBAQ	C90.66 H134.6 Co2 N24 O0.66/Distance=2.00A(Set #1)	tris(2,2'-Benzene-1,4-diylbis(5,5-di-n-propyl-3,4,5,6-tetrahydropyrimidin-1-ium)) bis(hexacyano-cobalt(iii)) methanol solvate.	P.Dechambenoit,S.Ferlay,N.Kyritsakas,M.W.Hosseini	CHEM.COMMUN.,2009,,,6798	P-3	0D	6	A*M1)6	1,6M7-1	octahedron	|Co|	|3|	|6|	|C6|	0
FULBEU	C90.66 H134.6 Fe2 N24 O0.66/Distance=2.00A(Set #1)	tris(2,2'-Benzene-1,4-diylbis(5,5-di-n-propyl-3,4,5,6-tetrahydropyrimidin-1-ium)) bis(hexacyano-iron(iii)) methanol solvate.	P.Dechambenoit,S.Ferlay,N.Kyritsakas,M.W.Hosseini	CHEM.COMMUN.,2009,,,6798	P-3	0D	6	A*M1)6	1,6M7-1	octahedron	|Fe|	|3|	|6|	|C6|	0
GALMEL	C22 H20 Au1 N2 S8 Se4	bis(4,5-Dimethyl-9,10-ethylenedithio-1,3-diselena-6,8-dithiafulvalene)dicyano-gold(i).	K.Kikuchi,Y.Ishikawa,K.Saito,I.Ikemoto,K.Kobayashi	ACTA CRYSTALLOGR.,SECT.C:CRYST.STRUCT.COMMUN.,1988,44,,466	P-1	0D	2	A*M1)2	1,2M3-1	linear	|Au|	|1|	|2|	|C2|	0	-
GAXDIS10	C14 H19 Cd3 Cl2 N9/Distance=2.40A(Set #1)	catena-(3-Aminopropyl(dimethyl)ammonium heptacyano-tri-cadmium1,2-dichloroethane clathrate).	T.Kitazawa,S.Nishikiori,T.Iwamoto	J.CHEM.SOC.,DALTON TRANS.,1994,,,3695	Pn21m	3D	2.33	A)3*B2)7	4,6T52	octahedron & tetrahedron	|Cd|	|2|	|6|4|	|N6|C4|	1
GEFROZ	C28 H28 Au1 N4 O5 Se8/Distance=2.10A(Set #1)	bis(Dimethyl(ethylenedioxy)tetraselenafulvalene) tetracyano-goldtetrahydrofuran solvate.	T.Shirahata,M.Kibune,T.Imakubo	CHEM.COMMUN.,2006,,,1592	P21/c	0D	4	A*M1)4	1,4M5-1	square	|Au|	|3|	|4|	|C4|	0
GEFROZ01	C28 H28 Au1 N4 O5 Se8/Distance=2.00A(Set #1)	bis(Dimethyl(ethylenedioxy)tetraselenafulvalene) tetracyano-goldtetrahydrofuran solvate.	T.Shirahata,M.Kibune,T.Imakubo	CHEM.COMMUN.,2006,,,1592	Pnma	0D	4	A*M1)4	1,4M5-1	square	|Au|	|3|	|4|	|C4|	0
GEHSAN	C12 H24 Ca2 Fe1 N10 O6/Distance=2.00A(Set #1)	catena(hexakis(\m~2~-Cyano)-(\m~2~-hexamethylenetetramine-N,N')-bis(diaqua-calcium)-iron dihydrate).	H.-J.Meyer,J.Pickardt	Z.NATURFORSCH.,B:CHEM.SCI.,1988,43,,135	B112/b	0D	6	A*M1)6	1,6M7-1	octahedron	|Fe|	|3|	|6|	|C6|	0
GEYHOJ	C38 H32 Ag1 N2 S24	bis(2-(5-(4,5-bis(methylsulfanyl)-1,3-dithiol-2-ylidene)[1,3]dithiolo[4,5-d][1,3]dithiol-2-ylidene)-4a,5,6,7,8,8a-hexahydro[1,3]dithiolo[4,5-b][1,4]benzodithiinium) dicyano-silver.	T.Kawamoto,M.Ashizawa,T.Mori	BULL.CHEM.SOC.JPN.,2013,86,,526	P-1	0D	2	A*M1)2	1,2M3-1	linear	|Ag|	|1|	|2|	|C2|	0	-
GEZWUD	C18 H34 Fe1 N14 Na3 O5/Distance=2.00A(Set #1)	catena(Penta-aqua-hexacyano-bis(N-hexamethylenetetramine)-tri-sodium-iron(iii)).	H.-J.Meyer,J.Pickardt	Z.NATURFORSCH.,B:CHEM.SCI.,1988,43,,1161	Pca21	0D	6	A*M1)6	1,6M7-1	octahedron	|Fe|	|3|	|6|	|C6|	0
GILLET	C42 H28 Co1 N10 O4 S24/Distance=1.90A(Set #1)	\a'-tetrakis(4',5'-Ethylenedithiofulvalene-4-carboxamide radical)hexacyano-cobalt.	L.V.Zorina,S.S.Khasanov,S.V.Simonov,R.P.Shibaeva,L.A.Kushch,L.I.Buravov,E.B.Yagubskii,S.Baudron,C.Meziere,P.Batail,E.Canadell,P.Auban-Senzier	Synth.Met.,2005,155,,527	P21/c	0D	6	A*M1)6	1,6M7-1	octahedron	|Co|	|3|	|6|	|C6|	0
GILLIX	C60 H42 Fe1 N12 O6 S36	\b-hexakis(4',5'-Ethylenedithiofulvalene-4-carboxamide radical) hexacyano-iron.	L.V.Zorina,S.S.Khasanov,S.V.Simonov,R.P.Shibaeva,L.A.Kushch,L.I.Buravov,E.B.Yagubskii,S.Baudron,C.Meziere,P.Batail,E.Canadell,P.Auban-Senzier	Synth.Met.,2005,155,,527	P-1	0D	6	A*M1)6	1,6M7-1	octahedron	|Fe|	|3|	|6|	|C6|	0	-
GIMDIP	C24 H24 N4 Ni1 S8	(3,3',4,4'-Tetramethyl-2,2',5,5'-tetrathiafulvalenium)(3,3',4,4'-tetramethyl-2,2',5,5'-tetrathiafulvalene) tetracyano-nickel(ii).	M.Bencharif,L.Ouahab	ACTA CRYSTALLOGR.,SECT.C:CRYST.STRUCT.COMMUN.,1988,44,,1514	P-1	0D	4	A*M1)4	1,4M5-1	square	|Ni|	|2|	|4|	|C4|	0	-
GIQHOE	C18 H20 N8 Ni1 O2	1,4-bis(5-Hydroxy-3,4,5,6-tetrahydropyrimidin-1-ium-2-yl)benzenetetracyano-nickel.	P.Dechambenoit,S.Ferlay,M.W.Hosseini,N.Kyritsakas	CHEM.COMMUN.,2007,,,4626	P-1	0D	4	A*M1)4	1,4M5-1	square	|Ni|	|2|	|4|	|C4|	0	-
GIQHUK	C18 H20 N8 O2 Pd1	1,4-bis(5-Hydroxy-3,4,5,6-tetrahydropyrimidin-1-ium-2-yl)benzenetetracyano-palladium.	P.Dechambenoit,S.Ferlay,M.W.Hosseini,N.Kyritsakas	CHEM.COMMUN.,2007,,,4626	P-1	0D	4	A*M1)4	1,4M5-1	square	|Pd|	|2|	|4|	|C4|	0	-
GIQJAS	C18 H20 N8 O2 Pt1	1,4-bis(5-Hydroxy-3,4,5,6-tetrahydropyrimidin-1-ium-2-yl)benzenetetracyano-platinum.	P.Dechambenoit,S.Ferlay,M.W.Hosseini,N.Kyritsakas	CHEM.COMMUN.,2007,,,4626	P-1	0D	4	A*M1)4	1,4M5-1	square	|Pt|	|2|	|4|	|C4|	0	-
GIQJAS01	C18 H20 N8 O2 Pt1	1,4-bis(5-Hydroxy-3,4,5,6-tetrahydropyrimidin-1-ium-2-yl)benzenetetracyano-platinum.	P.Dechambenoit,S.Ferlay,M.W.Hosseini,N.Kyritsakas	CHEM.COMMUN.,2007,,,4626	P-1	0D	4	A*M1)4	1,4M5-1	square	|Pt|	|2|	|4|	|C4|	0	-
GOKZOV	C14 H24 Ag1 Cs1 N2 O6/Distance=2.10A(Set #1)	18-Crown-6-cesium dicyano-silver(i).	Yu.A.Manskaya,V.V.Ponomareva,K.V.Domasevich,I.Siler,V.N.Kokozei,V.V.Skopenko	ZH.OBSHCH.KHIM.(RUSS.)(RUSS.J.GEN.CHEM.),1998,68,,1256	Ibam	0D	2	A*M1)2	1,2M3-1	linear	|Ag|	|1|	|2|	|C2|	0
GOKZUB	C14 H24 Ag1 N2 O6 Rb1/Distance=0.00A(Set #1);Distance=0.00A(Set #1);Distance=2.40A(Set #2);Distance=0.00A(Set #1)	18-Crown-6-rubidium dicyano-silver(i).	Manskaya YU.A.,Ponomareva V.V.,Domasevich K.B.,Siler I.,Kokozei V.N.,Skopenko V.V.	ZH.OBSHCH.KHIM.(RUSS.)(RUSS.J.GEN.CHEM.),1998,68,,1256	P21/n	0D	2	A*M1)2	1,2M3-1	linear	|Ag|	|1|	|2|	|C2|CN|	0
GORQAF	C4 H4 Br2 Cd1 N2/Distance=2.20A(Set #1)	catena(bis(\m~2~-Cyano)-cadmium 1,2-dibromoethane clathrate).	T.Kitazawa	CHEM.COMMUN.,1999,,,891	I41/amd	3D	2	A*B2)2	dia Diamond; 4/6/c1; sqc6	tetrahedron	|Cd|	|2|	|4|	|N4|	1
GOWZOH	C28 H28 N12 O4 W1	bis(2,2'-Bipyridinium) octacyano-tungsten(iv) tetrahydrate.	J.Szklarzewicz,A.Samotus,B.Nowicka,J.Burgess,J.Fawcett,D.R.Russell	TRANSITION MET.CHEM.,1999,24,,177	P42212	0D	8	A*M1)8	1,8M9-1	square antiprism	|W|	|4|	|8|	|C8|	0	-
GOXCIF	C16 H15 Au1 N14 O2/Distance=3.10A(Set #2)	9-Methylguanidinium 9-methylguanine tetracyano-gold.	A.Schimanski,E.Freisinger,A.Erxleben,B.Lippert	INORG.CHIM.ACTA,1998,283,,223	P-1	0D	4	A*M1)4	1,4M5-1	square	|Au|	|3|	|4|	|C4|	0
GOXCOL	C14 H19 Au1 N10 O4	1-Methylcytosinium 1-methylcytosine tetracyano-gold dihydrate.	A.Schimanski,E.Freisinger,A.Erxleben,B.Lippert	INORG.CHIM.ACTA,1998,283,,223	P-1	0D	4	A*M1)4	1,4M5-1	square	|Au|	|3|	|4|	|C4|	0	-
GUYPOG	C24 H40 Mn3 N10/Distance=2.20A(Set #2)	catena-[bis(Tetraethylammonium) hexakis(\m~2~-cyano)-dicyano-trimanganese(ii)].	J.-H.Her,P.W.Stephens,C.M.Kareis,J.G.Moore,J.S.Miller	Angew.Chem.,Int.Ed.,2010,49,,7773	P-3m1	2D	2.67	A)3*B2)6*M1)2	kgd; Shubnikov plane net (3.6.3.6)/dual	octahedron & tetrahedron	|Mn|	|2|	|4|6|	|CN3|C6|	1
HACBET	C163 H149 Ca4 Fe3 N42 O25/Distance=2.00A(Set #1)	bis(\m~2~-Cyano)-hexa-aqua-tetracyano-tetrakis(1,10-phenanthroline-N,N')-di-calcium-iron 1,10-phenanthroliniumtetrakis(\m~2~-cyano)-tetra-aqua-octacyano-tetrakis(1,10-phenanthroline-N,N')-di-calcium-di-iron tris(1,10-phenanthroline) methanol solvatetetradecahydrate.	A.Datta,G.M.G.Hossain,N.K.Karan,K.M.A.Malik,S.Mitra	Inorg.Chem.Commun.,2003,6,,266	P-1	0D	6	A*M1)6	1,6M7-1	octahedron	|Fe|	|3|	|6|	|C6|	0
HADYOB	C48 H52 Fe1 N6 O2 P3	tris(Dimethyl(diphenyl)phosphonium) hexacyanoferrate(iii) dihydrate.	P.A.W.Dean,K.Fisher,D.Craig,M.Jennings,O.Ohene-Fianko,M.Scudder,G.Willett,I.Dance	DALTON TRANS.,2003,,,1520	P2/c	0D	6	A*M1)6	1,6M7-1	octahedron	|Fe|	|3|	|6|	|C6|	0	-
HADYUH	C43 H40 Fe1 N6 O3 P2/Distance=2.00A(Set #1)	bis(Methyl(triphenyl)phosphonium) pentacyano-nitrosyl-iron(iii) dihydrate.	P.A.W.Dean,K.Fisher,D.Craig,M.Jennings,O.Ohene-Fianko,M.Scudder,G.Willett,I.Dance	DALTON TRANS.,2003,,,1520	P21/c	0D	6	A*M1)6	1,6M7-1	octahedron	|Fe|	|3|	|6|	|C6|	0
HAXNOJ	C21 H20 Cd4 K1 N13/Distance=2.40A(Set #1)	catena-(Potassium nonakis(\m~2~-cyano)-tetra-cadmium tetrapropionitrileclathrate).	T.Kitazawa,H.Sugisawa,M.Takeda,T.Iwamoto	CHEM.COMMUN.,1993,,,1855	Pnma	3D	2.25	A)4*B2)9	4,4,4,6T1	octahedron & tetrahedron	|Cd|	|2|	|6|4|	|N6|C4|	1
HAYDAM	C28 H35 N7 Ni1	bis(2-Phenylethylammonium) tetracyano-nickel(ii) N,N-dimethylaniline solvate.	A.Ebina,S.Nishikiori,T.Iwamoto	CHEM.COMMUN.,1994,,,233	Pccn	0D	4	A*M1)4	1,4M5-1	square	|Ni|	|2|	|4|	|C4|	0	-
HECKUW	C20 H42 N8 Ni1 O2	meso-5,7,7,12,14,14-hexamethyl-4,11-diaza-1,8-diazoniacyclotetradecanetetracyano-nickel dihydrate.	Jian-Gang Ding,Fei Geng,Bao-Long Li,Yong Zhang	Jiegou Huaxue(Chin.J.Struct.Chem.),2006,25,,25	P21/n	0D	4	A*M1)4	1,4M5-1	square	|Ni|	|2|	|4|	|C4|	0	-
HETRAZ	C26 H16 Au1 Cl2 N2 S8/Distance=2.00A(Set #1)	1,2-bis(2-Chlorophenyl)-1,2-bis(4,5-ethylenedithio-1,3-dithiol-2-ylidene)ethane dicyano-gold.	Y.Yamashita,M.Tomura,M.B.Zaman,K.Imaeda	CHEM.COMMUN.,1998,,,1657	P21/c	0D	2	A*M1)2	1,2M3-1	linear	|Au|	|1|	|2|	|C2|	0
HITPOQ	C14 H26 Mo1 N8 O1/Distance=2.10A(Set #1)	bis(Tetramethylammonium) hexacyano-molybdenum(iv) monohydrate.	J.Szklarzewicz,D.Matoga,A.Niezgoda,D.Yoshioka,M.Mikuriya	INORG.CHEM.,2007,46,,9531	Fm-3m	0D	6	A*M1)6	1,6M7-1	octahedron	|Mo|	|4|	|6|	|C6|	0
HONLEC	C28 H18 N8 O2 Pt1 S8	bis(4-(((2-(1,3-dithiol-2-ylidene)-1,3-dithiol-4-yl)carbonyl)amino)pyridinium)tetracyano-platinum(ii).	V.Martinez,A.B.Gaspar,M.C.Munoz,R.Ballesteros,N.Ortega-Villar,V.M.Ugalde-Saldivar,E.R.Moreno-Esparza,J.A.Real	EUR.J.INORG.CHEM.,2009,,,303	P-1	0D	4	A*M1)4	1,4M5-1	square	|Pt|	|2|	|4|	|C4|	0	-
HUHBUH	C5 H9 Ag1 N2 Te1	trimethyltelluronium dicyano-silver.	Klapotke T.M.,Krumm B.,Mayer P.,Piotrowski H.,Schwab I.,Vogt M.	EUR.J.INORG.CHEM.,2002,,,2701	P21/n	0D	2	A*M1)2	1,2M3-1	linear	|Ag|	|1|	|2|	|C2|	0	-
HUHCES	C21 H16 Ag1 Cl3 N2 Te1	triphenyltelluronium dicyano-silver chloroform solvate.	Klapotke T.M.,Krumm B.,Mayer P.,Piotrowski H.,Schwab I.,Vogt M.	EUR.J.INORG.CHEM.,2002,,,2701	Pbcn	0D	2	A*M1)2	1,2M3-1	linear	|Ag|	|1|	|2|	|C2|	0	-
ICIRER	C70 H44 Mo2 N16 O4 S36/Distance=2.20A(Set #1)	nonakis(Tetrathiafulvalene) bis(octacyano-molybdenum(iv)) tetrahydrate.	G.Rombaut,S.S.Turner,D.Le Pevelen,C.Mathoniere,P.Day,K.Prout	J.CHEM.SOC.,DALTON TRANS.,2001,,,3244	P-1	0D	8	A*M1)8	1,8M9-1	trigonal dodecahedron	|Mo|	|4|	|8|	|C8|	0
ICIRER01	C70 H44 Mo2 N16 O4 S36/Distance=2.20A(Set #1)	nonakis(Tetrathiafulvalene) bis(octacyano-molybdenum(iv)) tetrahydrate.	G.Rombaut,S.S.Turner,D.Le Pevelen,C.Mathoniere,P.Day,K.Prout	J.CHEM.SOC.,DALTON TRANS.,2001,,,3244	P-1	0D	8	A*M1)8	1,8M9-1	trigonal dodecahedron	|Mo|	|4|	|8|	|C8|	0
IDUGEV	C40 H36 N14 O4 Pt1	bis(2-(2,5-bis(Pyridin-2-yl)-1H-imidazol-4-yl)pyridinium)tetracyano-platinum(ii) tetrahydrate.	R.Gamez-Heredia,R.E.Navarro,H.Hopfl,A.Cruz-Enriquez,J.J.Campos-Gaxiola	ACTA CRYSTALLOGR.,SECT.E:STRUCT.REP.ONLINE,2013,69,,m300	C2/c	0D	4	A*M1)4	1,4M5-1	square	|Pt|	|2|	|4|	|C4|	0	-
IQAJIU	C21 H20 Fe1 N8 O2	6,7-Dihydro-5H-[1,4]diazepino[1,2,3,4-lmn][1,10]phenanthrolinediiumhexacyano-iron trioxonium.	Zhenhua Zhang,Yunyin Niu,S.W.Ng,Benlai Wu,Hongwei Hou	J.Coord.Chem.,2011,64,,1683	P21/c	0D	6	A*M1)6	1,6M7-1	octahedron	|Fe|	|3|	|6|	|C6|	0	-
ISEDUF	(C6H11N2)Ag(CN)2	1-ethyl-3-methylimidazolium dicyano-silver(i).	Yoshida Y.,Muroi K.,Otsuka A.,Saito G.,Takahashi M.,Yoko T.	INORG.CHEM.,2004,43,,1458	Pbca	0D	2	A*M1)2	1,2M3-1	linear	|Ag|	|1|	|2|	|C2|	0	-
ITANUM	(NH2(CH3)2)(Cu2(CN)3)	catena-(dimethylammonium bis(\m~3~-cyano)-(\m~2~-cyano)-di-copper).	Pretsch T.,Brudgam I.,Hartl H.	Z.ANORG.ALLG.CHEM.,2004,630,,353	Pna21	3D	1.5	A)2*B3)2*B2	fsc-3,4-Pbcn-1	tetrahedron	|Cu|	|1|	|4|	|C2N2|C3N|	1	-
ITAPAU	C9 H16 Cu2 N4	catena-(diisopropylammonium (\m~3~-cyano)-bis(\m~2~-cyano)-di-copper).	Pretsch T.,Brudgam I.,Hartl H.	Z.ANORG.ALLG.CHEM.,2004,630,,353	Pbca	3D	1.5	A)2*B3*B2)2	3,3,4T20	tetrahedron & triangular	|Cu|	|1|	|3|4|	|C2N|C2N2|	1	-
ITAPEY	C9 H16 Cu2 N4	catena-(di-n-propylammonium (\m~3~-cyano)-bis(\m~2~-cyano)-di-copper).	Pretsch T.,Brudgam I.,Hartl H.	Z.ANORG.ALLG.CHEM.,2004,630,,353	P21/n	3D	1.5	A)2*B3*B2)2	3,3,4T36	tetrahedron & triangular	|Cu|	|1|	|3|4|	|C2N|C2N2|	1	-
ITAPIC	C22 H40 Cu4 N8	catena-(bis(di-sec-butylammonium)(\m~3~-cyano)-pentakis(\m~2~-cyano)-tetra-copper).	Pretsch T.,Brudgam I.,Hartl H.	Z.ANORG.ALLG.CHEM.,2004,630,,353	P21/c	3D	1.5	A)4*B3*B2)5	3,3,3,3,4T11	tetrahedron & triangular	|Cu|	|1|	|3|4|	|C2N|C2N2|CN2|	1	-
IWIPEK	C11 H16 Cu3 N7/Distance=2.40A(Set #3)	catena-(1,4-dimethylpiperazine-1,4-diiumbis(\m~3~-cyanido)-tris(\m~2~-cyanido)-tri-copper(i)).	Ying-Lian Qin,Juan-Juan Hou,Jin Lv,Xian-Ming Zhang	CRYST.GROWTH DES.,2011,11,,3101	Pnma	3D	1.67	A)3*B3)2*B2)3	3,3,4,4,4T16	tetrahedron	|Cu|	|1|	|4|	|C2N2|C4|	1
IWIPIO	C11 H16 Cu4 N8/Distance=2.40A(Set #1);Distance=0.00A(Set #1);Distance=0.00A(Set #1);Distance=0.00A(Set #1)	catena-(3-ammonio-3,3-dimethylpropylaminiumbis(\m~3~-cyanido)-tetrakis(\m~2~-cyanido)-tetra-copper(i)).	Ying-Lian Qin,Juan-Juan Hou,Jin Lv,Xian-Ming Zhang	CRYST.GROWTH DES.,2011,11,,3101	Pbcn	3D	1.5	A)2*B3*B2)2	3,3,4T72	tetrahedron & triangular	|Cu|	|1|	|4|3|	|C3N|C2N|	1
IXUKIV	C21 H28 Cu2 N6	catena-(Cyclohexylammonium tris(\m~2~-cyano-C,N)-di-copper(i) bis(aniline)clathrate).	Sock-Sung Yun,Hyoung-Sil Moon,Chong-Hyeak Kim,Sueg-Geun Lee	J.Coord.Chem.,2004,57,,321	P21/n	2D	1.5	A)2*B2)3	hcb; Shubnikov hexagonal plane net/(6,3)	triangular	|Cu|	|1|	|3|	|N3|C3|	1	-
JADYES	C22 H46 Co1 I1 N10 O3/Distance=2.00A(Set #1)	1,1,4,4,7,7,10,10-Octamethyl-1,4,7,10-tetra-azacyclododecanehexacyano-cobalt(iii) iodide trihydrate.	A.Bianchi,M.Micheloni,P.Orioli,P.Paoletti,S.Mangani	INORG.CHIM.ACTA,1988,146,,153	P-1	0D	6	A*M1)6	1,6M7-1	octahedron	|Co|	|3|	|6|	|C6|	0
JANMIV	C30 H36 Fe1 N10 O6	6,7-Dihydrodipyrido(1,2-a:2',1'-c)pyrazine-5,8-diium6,7-dihydrodipyrido(1,2-a:2',1'-c)pyrazine-5-ium hexacyanoferrate hexahydrate.	V.Yu.Kotov,A.B.Ilyukhin,V.K.Lunina,L.K.Shpigun	MENDELEEV COMMUN.,2005,,,95	P-1	0D	6	A*M1)6	1,6M7-1	octahedron	|Fe|	|3|	|6|	|C6|	0	-
JEHBAA	C38 H72 N13 V1/Distance=2.20A(Set #1)	tris(Tetraethylammonium) hexacyano-vanadium acetonitrile solvate.	M.Shatruk,K.R.Dunbar	PRIVATE COMMUNICATION,2006,,,	C2/c	0D	6	A*M1)6	1,6M7-1	octahedron	|V|	|3|	|6|	|C6|	0
JEJFAF	C8 H12 Cu1 N5 Pt1/Distance=2.10A(Set #1)	catena(Tetramethylammonium tetrakis(\m~2~-cyano)-di-copper-platinum).	R.W.Gable,B.F.Hoskins,R.Robson	CHEM.COMMUN.,1990,,,762	P42/mmc	3D	2	A*B2)2	pts PtS, Cooperite; sqc183	tetrahedron & square	|Cu|Pt|	|1|2|	|4|	|N4|C4|	1
JEYXAM	(C4H7N2)Au(CN)2	Lysidinium dicyano-gold.	Schwellnus A.H.,Denner L.,Boeyens J.C.A.	POLYHEDRON,1990,9,,975	P21/c	0D	2	A*M1)2	1,2M3-1	linear	|Au|	|1|	|2|	|C2|	0	-
JIHPAR01	Cs2K(Fe(CN)6)	Dicesium potassium hexacyano-iron(iii).	Figgis B.N.,Kucharski E.S.,Raynes J.M.,Reynolds P.A.	J.CHEM.SOC.,DALTON TRANS.,1990,,,3597	P21/n	0D	6	A*M1)6	1,6M7-1	octahedron	|Fe|	|3|	|6|	|C6|	0	-
JIRZOZ	C23 H16 Cu2 N3 S16/Distance=2.40A(Set #1);Distance=3.20A(Set #1);Distance=0.00A(Set #1);Distance=0.00A(Set #1)	catena(bis(bis(Ethylenedithio)tetrathiafulvalene) tris(\m~2~-cyano)-di-copper).	U.Geiser,Hau H.Wang,K.D.Carlson,J.M.Williams,H.A.Charlier Junior,J.E.Heindl,G.A.Yaconi,B.J.Love,M.W.Lathrop,J.E.Schirber,D.L.Overmyer,Jingquing Ren,Myung-Hwan Whangbo	INORG.CHEM.,1991,30,,2586	P21/c	2D	1.5	A)2*B2)3	hcb; Shubnikov hexagonal plane net/(6,3)	triangular	|Cu|	|1|	|3|	|CN2|	1
JIRZOZ27	C23 H16 Cu2 N3 S16/Distance=2.40A(Set #1);Distance=0.00A(Set #1);Distance=0.00A(Set #1);Distance=0.00A(Set #1)	catena-[bis(\k-bis(Ethylenedithio)tetrathiafulvalene)tris(\m~2~-cyano)-di-copper(i)].	H.O.Jeschke,M.de Souza,R.Valenti,R.S.Manna,M.Lang,J.A.Schlueter	PHYS.REV.B,CONDENS.MAT.,2012,85,,35125	P21/c	2D	1.5	A)2*B2)3	hcb; Shubnikov hexagonal plane net/(6,3)	triangular	|Cu|	|1|	|3|	|C2N|	1
JIRZOZ31	C23 H16 Cu2 N3 S16	catena-[bis(\k-bis(Ethylenedithio)tetrathiafulvalene)tris(\m~2~-cyano)-di-copper(i)].	H.O.Jeschke,M.de Souza,R.Valenti,R.S.Manna,M.Lang,J.A.Schlueter	PHYS.REV.B,CONDENS.MAT.,2012,85,,35125	P21/c	2D	1.5	A)2*B2)3	hcb; Shubnikov hexagonal plane net/(6,3)	triangular	|Cu|	|1|	|3|	|C2N|	1
JOGMOH	C44 H32 N4 Ni1 S32	tetrakis(bis(Ethylenedithio)fulvalene) tetracyano-nickel.	A.Kawamoto,M.Tanaka,J.Tanaka	BULL.CHEM.SOC.JPN.,1991,64,,3160	P-1	0D	4	A*M1)4	1,4M5-1	square	|Ni|	|2|	|4|	|C4|	0	-
JOGMOH01	C44 H32 N4 Ni1 S32/Distance=1.90A(Set #1)	tetrakis(bis(Ethylenedithio)tetrathiafulvalene) tetracyano-nickel(ii).	M.Fettouhi,L.Ouahab,D.Grandjean,L.Toupet	ACTA CRYSTALLOGR.,SECT.B:STRUCT.SCI.,1993,49,,685	P-1	0D	4	A*M1)4	1,4M5-1	square	|Ni|	|2|	|4|	|C4|	0
JOGMOH02	C44 H32 N4 Ni1 S32	tetrakis(bis(Ethylenedithio)tetrathiafulvalene) tetracyano-nickel(ii).	M.Fettouhi,L.Ouahab,D.Grandjean,L.Toupet	ACTA CRYSTALLOGR.,SECT.B:STRUCT.SCI.,1993,49,,685	P-1	0D	4	A*M1)4	1,4M5-1	square	|Ni|	|2|	|4|	|C4|	0	-
JOYVAU	C42 H38 Ag1 N3 O1 P2	bis(Triphenylphosphine)iminium dicyano-silver tetrahydrofuran solvate.	M.Carcelli,C.Ferrari,C.Pelizzi,G.Pelizzi,G.Predieri,C.Solinas	J.CHEM.SOC.,DALTON TRANS.,1992,,,2127	P21/c	0D	2	A*M1)2	1,2M3-1	linear	|Ag|	|1|	|2|	|C2|	0	-
JOZWOK	C32 H20 N4 O2 Pt1 S24	tetrakis(2-(1,3-Dithiol-2-ylidene)-(1,3)dithiolo(4,5-d) (1,3)dithiol)iumtetracyano-platinum dihydrate.	M.Fettouhi,L.Ouahab,D.Grandjean,G.Mousdis,P.Delhaes	ACTA CRYSTALLOGR.,SECT.C:CRYST.STRUCT.COMMUN.,1992,48,,1920	P-1	0D	4	A*M1)4	1,4M5-1	square	|Pt|	|2|	|4|	|C4|	0	-
JUTCUW	C3 H1 Cd1 Cl3 N2	catena-(Chloroform bis(\m~2~-cyano)-cadmium clathrate).	B.F.Abrahams,M.J.Hardie,B.F.Hoskins,R.Robson,G.A.Williams	,1992,114,,10641	Fd3m	3D	2	A*B2)2	dia Diamond; 4/6/c1; sqc6	tetrahedron	|Cd|	|2|	|4|	|C4|	1
KAFZOG	C84 H54 Fe3 N18 O5 S44/Distance=2.00A(Set #1)	undecakis(Tetrathiafulvalene) tris(hexacyano-iron) pentahydrate.	S.Bouherour,L.Ouahab,O.Pena,J.Padiou,D.Grandjean	ACTA CRYSTALLOGR.,SECT.C:CRYST.STRUCT.COMMUN.,1989,45,,371	P-1	0D	6	A*M1)6	1,6M7-1	octahedron	|Fe|	|3|	|6|	|C6|	0
KAGLAG	C78 H64 As3 N6 O2 Ru1	tris(tetraphenylarsonium) hexacyanoruthenate(iii) dihydrate.	J.Bendix,P.Steenberg,I.Sotofte	INORG.CHEM.,2003,42,,4510	P21/n	0D	6	A*M1)6	1,6M7-1	octahedron	|Ru|	|3|	|6|	|C6|	0	-
KAHKIN	C114 H91 Mn1 N9 O0.5 P6/Distance=2.10A(Set #1)	tris[bis(Triphenylphosphine)iminium] hexacyanomanganate(iii) hemihydrate.	W.E.Buschmann,L.Liable-Sands,A.L.Rheingold,J.S.Miller	INORG.CHIM.ACTA,1999,284,,175	Pbcn	0D	6	A*M1)6	1,6M7-1	octahedron	|Mn|	|3|	|6|	|C6|	0
KAHKUB	C12 H10 Fe1 K1 N10/Distance=2.00A(Set #1)	catena-[bis(Imidazolium) hexakis(\m~2~-cyano)-iron(iii)-potassium(i)].	Wen Zhang,Ying Cai,Ren-Gen Xiong,H.Yoshikawa,K.Awaga	Angew.Chem.,Int.Ed.,2010,49,,6608	R-3m	0D	6	A*M1)6	1,6M7-1	octahedron	|Fe|	|3|	|6|	|C6|	0
KAHKUB02	C12 H10 Fe1 K1 N10	catena-[bis(Imidazolium) hexakis(\m~2~-cyano)-iron(iii)-potassium(i)].	Wen Zhang,Ying Cai,Ren-Gen Xiong,H.Yoshikawa,K.Awaga	Angew.Chem.,Int.Ed.,2010,49,,6608	C2/c	0D	6	A*M1)6	1,6M7-1	octahedron	|Fe|	|3|	|6|	|C6|	0	-
KAXSUY	C34 H32 Fe1 N12 O5.5/Distance=2.60A(Set #4) one atom Fe delited	Hydrogen 1,4-bis(4,4'-bipyridinio)phthalazine hexacyano-iron(iii) hydrate.	Yan-Qiong SUN,Jie ZHANG,Zhan-Feng JU,Guo-Yu YANG	AUST.J.CHEM.,2005,58,,572	P-1	0D	6	A*M1)6	1,6M7-1	octahedron	|Fe|	|3|	|6|	|C6|	0
KEGZOL	C8 H12 Cu1 N5 Zn1	catena-((Tetramethylammonium) tetrakis(\m~2~-cyano)-copper(i)-zinc(ii)).	B.F.Hoskins,R.Robson	J.AM.CHEM.SOC.,1990,112,,1546	F-43m	3D	2	A*B2)2	dia Diamond; 4/6/c1; sqc6	tetrahedron	|Cu|Zn|	|1|2|	|4|	|C4|N4|	1	-
KEGZOL02	(N(CH3)4)CuZn(CN)4	catena-(Tetramethylammonium tetrakis(\m~2~-cyano)-copper(i)-zinc(ii)).	Phillips A.E.,Halder G.J.,Chapman K.W.,Goodwin A.L.,Kepert C.J.	J.AM.CHEM.SOC.,2010,132,,10	P213	3D	2	A*B2)2	dia Diamond; 4/6/c1; sqc6	tetrahedron	|Cu|Zn|	|1|2|	|4|	|C4|N4|	1	-
KEGZOL04	(N(CH3)4)CuZn(CN)4	catena-(Tetramethylammonium tetrakis(\m~2~-cyano)-copper(i)-zinc(ii)).	Phillips A.E.,Halder G.J.,Chapman K.W.,Goodwin A.L.,Kepert C.J.	J.AM.CHEM.SOC.,2010,132,,10	F-43m	3D	2	A*B2)2	dia Diamond; 4/6/c1; sqc6	tetrahedron	|Cu|Zn|	|1|2|	|4|	|C4|N4|	1	-
KEKXAA	C25 H37 Au1 N4 O1	1-(4-Dodecyloxybenzyl)-3-methyl-1H-imidazolium dicyano-gold(i).	W.Dobbs,J.-M.Suisse,L.Douce,R.Welter	Angew.Chem.,Int.Ed.,2006,45,,4179	P-1	0D	2	A*M1)2	1,2M3-1	linear	|Au|	|1|	|2|	|C2|	0	-
KEKXEE	C25 H37 Ag1 N4 O1	1-(4-Dodecyloxybenzyl)-3-methyl-1H-imidazolium dicyano-silver(i).	W.Dobbs,J.-M.Suisse,L.Douce,R.Welter	Angew.Chem.,Int.Ed.,2006,45,,4179	P-1	0D	2	A*M1)2	1,2M3-1	linear	|Ag|	|1|	|2|	|C2|	0	-
KOYJUD	C10 H4 Ag1 N2 S8	bis(Methylenedithio)tetrathiafulvalene dicyano-silver(i).	Morosin B.,Nigrey P.J.	ACTA CRYSTALLOGR.,SECT.C:CRYST.STRUCT.COMMUN.,1992,48,,1216	Pmnn	0D	2	A*M1)2	1,2M3-1	linear	|Ag|	|1|	|2|	|C2|	0	-
LAFCIG	Rb3Co(CN)6	Tri-rubidium hexacyano-cobalt(iii).	Sereda O.A.,Stokli-Evans G.,Semenishin D.I.,Borovaya O.YA.	Koord.Khim.(Russ.)(Coord.Chem.),2009,35,,110	P21/c	0D	6	A*M1)6	1,6M7-1	octahedron	|Co|	|3|	|6|	|C6|	0	-
LAJFIL	C114 H94 Fe1 N9 O2 P6	tris(bis(Triphenylphosphine)iminium) hexacyano-iron dihydrate.	D.A.Cauzzi,G.Mori,G.Predieri,A.Tiripicchio,F.Cavatorta	INORG.CHIM.ACTA,1993,204,,181	Pbcn	0D	6	A*M1)6	1,6M7-1	octahedron	|Fe|	|3|	|6|	|C6|	0	-
LAMMAO	C14 H20 Cr1 K3 N6 O6 S2/Distance=2.10A(Set #1)	catena-(bis(\m~3~-Aqua)-hexakis(\m~2~-cyano)-bis(\m~2~-tetramethylenesulfone)-chromium-tri-potassium).	Wei Chen,Yun-Xia Che,Ji-Min Zheng	Jiegou Huaxue(Chin.J.Struct.Chem.),2005,24,,379	C2/c	0D	6	A*M1)6	1,6M7-1	octahedron	|Cr|	|3|	|6|	|C6|	0
LAQPOJ	C68 H135 Fe1 N12 O4 S1	tris(Dimethyl(hexadecyl)ammonio-acetamide) hexacyano-iron dimethylsulfoxidesolvate.	M.A.Walters,P.M.Tadross,A.L.Rheingold,L.N.Zakharov,D.Mudzudzu,J.Texter	INORG.CHEM.,2005,44,,1172	P-1	0D	6	A*M1)6	1,6M7-1	octahedron	|Fe|	|3|	|6|	|C6|	0	-
LAWXUE01	C6 H4 Mn2 N6 Na2 O2/Distance=2.30A(Set #2)	catena-(Di-sodium hexakis(\m~2~-cyano)-di-manganese dihydrate).	C.M.Kareis,S.H.Lapidus,J.-H.Her,P.W.Stephens,J.S.Miller	J.AM.CHEM.SOC.,2012,134,,2246	P21/n	3D	3	A*B2)3	pcu alpha-Po primitive cubic; 6/4/c1; sqc1	octahedron	|Mn|	|2|	|6|	|N6|C6|	1
LAWYEP	Na2Mn2(CN)6	catena-(Di-sodium hexakis(\m~2~-cyano)-di-manganese).	Kareis C.M.,Lapidus S.H.,Her J.-H.,Stephens P.W.,Miller J.S.	J.AM.CHEM.SOC.,2012,134,,2246	R-3	3D	3	A*B2)3	pcu alpha-Po primitive cubic; 6/4/c1; sqc1	octahedron	|Mn|	|2|	|6|	|C6|N6|	1	-
LEBXOF	C80 H152 Cl24 Mo2 N12	tetrakis(Tetra-n-butylammonium) bis(tetracyano-molybdenum) chloroform solvate.	S.L.Bartley,S.N.Bernstein,K.R.Dunbar	INORG.CHIM.ACTA,1993,213,,213	Pbca	0D	4	A)2*M1)8	1,5M10-1	square pyramid	|Mo|	|4|	|5|	|C4Mo|	0	-
LECMEL	C24 H42 Co2 K3 N15 O3/Distance=2.00A(Set #1)	Tripotassium tris(tetramethylammonium) bis(hexacyano-cobalt) trihydrate.	R.G.Romero,A.D.Morales,J.D.Rodriguez,J.F.Bertran	TRANSITION MET.CHEM.,1992,17,,573	P42/mbc	0D	6	A*M1)6	1,6M7-1	octahedron	|Co|	|3|	|6|	|C6|	0
LEHRIA	C34 H80 Fe3 N30 O8	tetrakis(Diethylenetriammonium) tris(hexacyano-ferrate(ii)) octahydrate.	Yu-Guang Li,Hai-Liang Zhu,E.R.T.Tiekink	ACTA CRYSTALLOGR.,SECT.E:STRUCT.REP.ONLINE,2006,62,,m760	P-1	0D	6	A*M1)6	1,6M7-1	octahedron	|Fe|	|2|	|6|	|C6|	0	-
LONYAO	C74 H128 Fe3 K1 N26 O14/Distance=2.00A(Set #1)	bis[2,5-bis((N'-Isopropyl-1,4-diazoniabicyclo[4.4.0]octanyl)methyl)-1,4-dimethylbenzene] potassium tris(ferricyanide) tetradecahydrate.	P.J.Garatt,Yiu-Fai Ng,J.W.Steed	TETRAHEDRON,2000,56,,4501	P-1	0D	6	A*M1)6	1,6M7-1	octahedron	|Fe|	|3|	|6|	|C6|	0
LORNEL	C8 H6 Cd1 N2/Distance=2.30A(Set #1)	catena-(bis(\m~2~-Cyano-C,N)-cadmium benzene clathrate).	T.Kitazawa,A.Nishimura	Zh.Strukt.Khim.(Russ.)(J.Struct.Chem.),1999,40,,892	R-3m	3D	2	A*B2)2	dia Diamond; 4/6/c1; sqc6	tetrahedron	|Cd|	|2|	|4|	|C4|	1
LUPGIM	C27 H57 Fe1 N10 O13	Ammonium sesqui(N,N'-diethyl-4,4'-dipyridinium) hexacyano-iron(ii)tridecahydrate.	M.Yu.Antipin,A.B.Ilyukhin,V.Yu.Kotov,B.V.Lokshin,G.B.Seifer,V.F.Chuvaev,A.B.Yaroslavtsev	ZH.NEORG.KHIM.(RUSS.)(RUSS.J.INORG.CHEM.),2002,47,,1139	P-3c1	0D	6	A*M1)6	1,6M7-1	octahedron	|Fe|	|2|	|6|	|C6|	0	-
LUQNOA	C59 H24 Fe1 N6 O1 S12/Distance=2.00A(Set #1)	tris(Tetrathiotetracene) pentacyano-nitroso-iron(iii).	I.Yu.Shevyakov,L.I.Buravov,L.A.Kushch,E.B.Yagubskii,S.S.Khasanov,L.V.Zorina,R.P.Shibaeva,N.V.Drichko,I.Olejniczak	Koord.Khim.(Russ.)(Coord.Chem.),2002,28,,520	I2/m	0D	6	A*M1)6	1,6M7-1	octahedron	|Fe|	|3|	|6|	|C6|	0
LUQNUG	C59 H24 Fe1 N6 O1 Se12/Distance=2.00A(Set #1)	tris(Tetraselenotetracene) pentacyano-nitroso-iron(iii).	I.Yu.Shevyakov,L.I.Buravov,L.A.Kushch,E.B.Yagubskii,S.S.Khasanov,L.V.Zorina,R.P.Shibaeva,N.V.Drichko,I.Olejniczak	Koord.Khim.(Russ.)(Coord.Chem.),2002,28,,520	P-1	0D	6	A*M1)6	1,6M7-1	octahedron	|Fe|	|3|	|6|	|C6|	0
LUYNAU	C38 H72 Cu4 N8/Distance=2.00A(Set #1)	catena-[bis(Tetrabutylammonium) hexakis(\m~2~-cyano)-tetra-copper(i)].	E.Siebel,P.Schwarz,R.D.Fischer	Solid State Ionics,1997,101,,285	P21/n	3D	1.5	A)2*B2)3	noe	triangular	|Cu|	|1|	|3|	|N3|	1
MABZPT	C24 H34 N8 O1 Pt1/Distance=2.10A(Set #2)	bis(N,N,N',N'-Tetramethyl-1,4-diamino-benzeniumyl) tetracyano-platinum(ii)monohydrate.	H.Endres,W.Jentsch,H.J.Keller,R.Martin,W.Moroni,D.Nothe	Z.NATURFORSCH.,B:CHEM.SCI.,1979,34,,140	A2/m	0D	4	A*M1)4	1,4M5-1	square	|Pt|	|2|	|4|	|C4|	0
MAVDES	C32 H34 Mo1 N12 O5	bis(6,7-Dihydrodipyrido(1,2-a:2',1'-c)pyrazinedi-ium)octacyano-molybdenum(iv) pentahydrate.	B.Nowicka,A.Samotus,J.Szklarzewicz,J.Burgess,J.Fawcett,D.R.Russell	POLYHEDRON,1998,17,,3167	Pbca	0D	8	A*M1)8	1,8M9-1	square antiprism	|Mo|	|4|	|8|	|C8|	0	-
MAVDIW	C32 H34 N12 O5 W1	bis(6,7-Dihydrodipyrido(1,2-a:2',1'-c)pyrazinedi-ium) octa-cyano-tungsten(iv)pentahydrate.	B.Nowicka,A.Samotus,J.Szklarzewicz,J.Burgess,J.Fawcett,D.R.Russell	POLYHEDRON,1998,17,,3167	Pbca	0D	8	A*M1)8	1,8M9-1	square antiprism	|W|	|4|	|8|	|C8|	0	-
MEMBIQ	C56 H42 F3 Fe1 N14 O7 Sr2/Distance=2.00A(Set #1)	bis(\m~2~-Cyano)-triaqua-tetracyano-(trifluoroacetato-O)-tetrakis(1,10-phenanthroline-N,N')-iron-di-strontium dihydrate.	B.Samanta,J.Chakraborty,N.K.Karan,R.K.B.Singh,G.P.A.Yap,C.Marschner,J.Baumgertner,S.Mitra	Struct.Chem.,2006,17,,139	P-1	0D	6	A*M1)6	1,6M7-1	octahedron	|Fe|	|3|	|6|	|C6|	0
MEMBOW	C56 H38 Ca2 Co1 F3 N14 O5/Distance=2.00A(Set #1)	bis(\m~2~-Cyano)-triaqua-tetracyano-(trifluoroacetato-O)-tetrakis(1,10-phenanthroline-N,N')-di-calcium-cobalt.	B.Samanta,J.Chakraborty,N.K.Karan,R.K.B.Singh,G.P.A.Yap,C.Marschner,J.Baumgartner,S.Mitra	Struct.Chem.,2006,17,,139	P-1	0D	6	A*M1)6	1,6M7-1	octahedron	|Co|	|3|	|6|	|C6|	0
METHGC	C3 H4 Hg1 N2 O1/Distance=0.00A(Set #1);Distance=0.00A(Set #1);Distance=2.00A(Set #1);Distance=0.00A(Set #1)	Methanol-mercury(ii) cyanide complex.	M.Ledesert,M.Frey,S.Nakajima,J.-C.Monier	BULL.SOC.FR.MINER.CRIST.,1969,92,,342	Pnma	0D	2	A*M1)2	1,2M3-1	linear	|Hg|	|2|	|2|	|C2|	0
MEWGIE	C22 H45 Fe1 N10 O3	(meso-5,7,7,12,14,14-Hexamethyl-1,4,8-triazonia-11-azacyclotetradecane)hexacyano-iron(iii) trihydrate.	En-Qing Gao,Jin-Kui Tang,Xue-Bing Leng,Dai-Zheng Liao,Zong-Hui Jiang,Shi-Ping Yan	Gaodeng Xuexiao Huaxue Xuebao(Chin.)(Chem.J.Chin.Univ.(Chinese Edition)),2000,21,,663	P-1	0D	6	A*M1)6	1,6M7-1	octahedron	|Fe|	|3|	|6|	|C6|	0	-
MEXKEH	C54 H61 Co1 N12 O5/Distance=2.00A(Set #1)	tris(3,4,7,8-tetramethyl-1,10-phenanthrolin-1-ium) hexacyanido-cobalt(iii)pentahydrate.	Ai-Yun Hu,Deng-Yong Yu,Ai-Hua Yuan	ACTA CRYSTALLOGR.,SECT.E:STRUCT.REP.ONLINE,2013,69,,m142	P-1	0D	6	A*M1)6	1,6M7-1	octahedron	|Co|	|3|	|6|	|C6|	0
MEXLUY	C16 H16 Mo0.5 N6 O2	4,4'-(Ethene-1,2-diyl)dipyridinium hemikis(octacyanido-molybdenum(v))dihydrate.	Xiao-Zhen YANG,Ai-Yun HU,Ai-Hua YUAN	ACTA CRYSTALLOGR.,SECT.E:STRUCT.REP.ONLINE,2013,69,,m132	Ccca	0D	8	A*M1)8	1,8M9-1	square antiprism	|Mo|	|5|	|8|	|C8|	0	-
MILHEU	C21 H44 Fe1 N9 O10/Distance=2.00A(Set #1)	tris(Betainium) hexacyanoferrate(iii) tetrahydrate.	B.Yan,H.D.Wang,Z.D.Chen	J.MOL.STRUCT.,2001,569,,65	P-1	0D	6	A*M1)6	1,6M7-1	octahedron	|Fe|	|3|	|6|	|C6|	0
MIMVUZ	C54 H76 Fe2 N24 O8	tris(Benzene-1,4-bis(N,N'-propanoformamidinio)) bis(hexacyano)-iron(iii)octahydrate.	S.Ferlay,O.Felix,M.W.Hosseini,J.-M.Planeix,N.Kyritsakas	CHEM.COMMUN.,2002,,,702	P-1	0D	6	A*M1)6	1,6M7-1	octahedron	|Fe|	|3|	|6|	|C6|	0	-
MIMWAG	C54 H76 Co2 N24 O8	tris(Benzene-1,4-bis(N,N'-propanoformamidinio)) bis(hexacyano)-cobalt(iii)octahydrate.	S.Ferlay,O.Felix,M.W.Hosseini,J.-M.Planeix,N.Kyritsakas	CHEM.COMMUN.,2002,,,702	P-1	0D	6	A*M1)6	1,6M7-1	octahedron	|Co|	|3|	|6|	|C6|	0	-
MIWWOE	C26 H18 Cl2 Fe1 N6 O1 S12/Distance=1.90A(Set #1)	bis(bis(Ethylenethia)tetrathiafulvalene) pentacyano-nitrosylferratedichloromethane solvate.	M.Clemente-Leon,E.Coronado,J.R.Galan-Mascaros,C.Gimenez-Saiz,C.J.Gomez-Garcia,E.Ribera,J.Vidal-Gancedo,C.Rovira,E.Canadell,V.Laukhin	INORG.CHEM.,2001,40,,3526	C2/c	0D	6	A*M1)6	1,6M7-1	octahedron	|Fe|	|3|	|6|	|C6|	0
MODMIB	C28 H24 Cd5 N14 O1/Distance=0.00A(Set #1);Distance=0.00A(Set #1);Distance=2.80A(Set #1);Distance=0.00A(Set #1)	catena-(1,1'-Dimethyl-4,4'-bipyridinium dodecakis(\m~2~-cyano)-penta-cadmium1-butanol clathrate).	H.Yoshikawa,S.Nishikiori,T.Watanabe,T.Ishida,G.Watanabe,M.Murakami,K.Suwinska,R.Luboradzki,J.Lipkowski	J.CHEM.SOC.,DALTON TRANS.,2002,,,1907	Cccm	3D	2.4	A)5*B2)12	4,5,6T1	octahedron & trigonal bipyramid & tetrahedron	|Cd|	|2|	|6|5|4|	|N6|C3N2|C4|	1
MODMOH	C26 H22 Cd5 N16 O5/Distance=0.00A(Set #1);Distance=0.00A(Set #1);Distance=2.80A(Set #1);Distance=0.00A(Set #1)	catena-(1,1'-Dimethyl-4,4'-bipyridinium dodecakis(\m~2~-cyano)-penta-cadmiumnitromethane monohydrate clathrate).	H.Yoshikawa,S.Nishikiori,T.Watanabe,T.Ishida,G.Watanabe,M.Murakami,K.Suwinska,R.Luboradzki,J.Lipkowski	J.CHEM.SOC.,DALTON TRANS.,2002,,,1907	Cccm	3D	2.4	A)5*B2)12	4,5,6T1	octahedron & trigonal bipyramid & tetrahedron	|Cd|	|2|	|6|5|4|	|N6|C3N2|C4|	1
MODMUN	C54 H40 Cd10 Cl6 N28/Distance=2.50A(Set #1)	catena-(bis(1,1'-Dimethyl-4,4'-bipyridinium)tetracosakis(\m~2~-cyano)-deca-cadmium trans-1,2-dichloroethane clathrate).	H.Yoshikawa,S.Nishikiori,T.Watanabe,T.Ishida,G.Watanabe,M.Murakami,K.Suwinska,R.Luboradzki,J.Lipkowski	J.CHEM.SOC.,DALTON TRANS.,2002,,,1907	Pncm	3D	2.4	A)5*B2)12	4,5,6T1	octahedron & trigonal bipyramid & tetrahedron	|Cd|	|2|	|6|5|4|	|N6|C3N2|C3N|C4|	1
MODNAU	(C12H14N2)Cd6(CN)14*2CHCl3	catena-(1,1'-Dimethyl-4,4'-bipyridiniumtetradecakis(\m~2~-cyano)-hexa-cadmium chloroform clathrate).	Yoshikawa H.,Nishikiori S.,Watanabe T.,Ishida T.,Watanabe G.,Murakami M.,Suwinska K.,Luboradzki R.,Lipkowski J.	J.CHEM.SOC.,DALTON TRANS.,2002,,,1907	Pbca	3D	2.33	A)3*B2)7	4,4,6T62	octahedron & tetrahedron	|Cd|	|2|	|6|4|	|N6|C3N|C4|	1	-
MODNEY	C30 H20 Cd6 N18	catena-(1,1'-Dimethyl-4,4'-bipyridiniumtetradecakis(\m~2~-cyano)-hexa-cadmium acetonitrile clathrate).	Yoshikawa H.,Nishikiori S.,Watanabe T.,Ishida T.,Watanabe G.,Murakami M.,Suwinska K.,Luboradzki R.,Lipkowski J.	J.CHEM.SOC.,DALTON TRANS.,2002,,,1907	Pbca	3D	2.33	A)3*B2)7	4,4,6T62	octahedron & tetrahedron	|Cd|	|2|	|6|4|	|N6|C3N|C4|	1	-
MODNIC	C32 H36 Cd6 N16 O5/Distance=2.40A(Set #1)	catena-(1,1'-Dimethyl-4,4'-bipyridiniumtetradecakis(\m~2~-cyano)-hexa-cadmium bis(2-propanol) trihydrate clathrate).	H.Yoshikawa,S.Nishikiori,T.Watanabe,T.Ishida,G.Watanabe,M.Murakami,K.Suwinska,R.Luboradzki,J.Lipkowski	J.CHEM.SOC.,DALTON TRANS.,2002,,,1907	Pbca	3D	2.33	A)3*B2)7	4,4,6T62	octahedron & tetrahedron	|Cd|	|2|	|6|4|	|N6|C3N|C4|	1
MODPAW	C30 H20 Cd5 N14/Distance=2.50A(Set #1)	catena-(1,1'-Dimethyl-4,4'-bipyridinium dodecakis(\m~2~-cyano)-penta-cadmiumbenzene clathrate).	H.Yoshikawa,S.Nishikiori,T.Watanabe,T.Ishida,G.Watanabe,M.Murakami,K.Suwinska,R.Luboradzki,J.Lipkowski	J.CHEM.SOC.,DALTON TRANS.,2002,,,1907	Icmm	3D	2.4	A)5*B2)12	4,5,6T2	octahedron & trigonal bipyramid & tetrahedron	|Cd|	|2|	|6|5|4|	|N6|C3N2|C4|	1
MODPEA	C31 H22 Cd5 N14/Distance=2.50A(Set #1)	catena-(1,1'-Dimethyl-4,4'-bipyridinium dodecakis(\m~2~-cyano)-penta-cadmiumtoluene clathrate).	H.Yoshikawa,S.Nishikiori,T.Watanabe,T.Ishida,G.Watanabe,M.Murakami,K.Suwinska,R.Luboradzki,J.Lipkowski	J.CHEM.SOC.,DALTON TRANS.,2002,,,1907	Icmm	3D	2.4	A)5*B2)12	4,5,6T2	octahedron & trigonal bipyramid & tetrahedron	|Cd|	|2|	|6|5|4|	|N6|C3N2|C4|	1
MODPOK	(C12H14N2)Cd(Cd(CN)6)	catena-(1,1'-Dimethyl-4,4'-bipyridiniumtetrakis(\m~2~-cyano)-dicyano-di-cadmium clathrate).	Yoshikawa H.,Nishikiori S.,Watanabe T.,Ishida T.,Watanabe G.,Murakami M.,Suwinska K.,Luboradzki R.,Lipkowski J.	J.CHEM.SOC.,DALTON TRANS.,2002,,,1907	C2/c	3D	3	A*B2)2*M1	pts PtS, Cooperite; sqc183	octahedron & tetrahedron	|Cd|	|2|	|4|6|	|C4|C2N4|	1	-
MPYENC	C18 H24 N6 Ni1 O3	1,2-bis-(2-Methylpyridinium)ethane tetracyanonickelate(ii) trihydrate.	L.D.C.Bok,S.S.Basson,J.G.Leipoldt,G.F.S.Wessels	ACTA CRYSTALLOGR.,SECT.B:STRUCT.CRYSTALLOGR.CRYST.CHEM.,1971,27,,1233	Pnnm	0D	4	A*M1)4	1,4M5-1	square	|Ni|	|2|	|4|	|C4|	0	-
MPYRET	C18 H16 N6 Ni1	1,2-bis-(N-Methyl-4-pyridinium)ethylene tetracyanonickelate(ii).	J.G.Leipoldt,S.S.Basson,L.D.C.Bok	ACTA CRYSTALLOGR.,SECT.B:STRUCT.CRYSTALLOGR.CRYST.CHEM.,1970,26,,361	P21/n	0D	4	A*M1)4	1,4M5-1	square	|Ni|	|2|	|4|	|C4|	0	-
MPYRNI	C16 H14 N6 Ni1	N,N'-Dimethyl-4,4'-dipyridinium tetracyanonickelate(ii).	S.S.Basson,L.D.C.Bok,J.G.Leipoldt	ACTA CRYSTALLOGR.,SECT.B:STRUCT.CRYSTALLOGR.CRYST.CHEM.,1969,25,,579	P21/n	0D	4	A*M1)4	1,4M5-1	square	|Ni|	|2|	|4|	|C4|	0	-
MUBXIR	C28 H23 N16 O2 W1	4,4'-Diazenediyldipyridinium 4-(4-pyridyldiazenyl)pyridiniumoctacyanido-tungstate(v) dihydrate.	Su-Yan QIAN,Wen-Yan LIU,Ai-Hua YUAN	ACTA CRYSTALLOGR.,SECT.E:STRUCT.REP.ONLINE,2009,65,,m1031	P212121	0D	8	A*M1)8	1,8M9-1	square antiprism	|W|	|5|	|8|	|C8|	0	-
MUFXAN	C15 H19 Au1 N5 O2	4-(1,3-Dihydroxy-4,4,5,5-tetramethyl-4,5-dihydro-1H-3\l^5^-imidazol-2-yl)-1-methylpyridinium radical cation dicyano-gold(i).	Yue MA,Na ZHOU,Xiao-Ping CHEN,Dong CAO,Dai-Zheng LIAO,Shi-Ping YAN	J.Coord.Chem.,2009,62,,3913	P212121	0D	2	A*M1)2	1,2M3-1	linear	|Au|	|1|	|2|	|C2|	0	-
NAPHOC01	C51 H37 Fe1 N7 O3 S32/Distance=2.00A(Set #1)	\k-tetrakis(2,5-bis(1,3-Dithiolan-2-ylidene)-1,3,4,6-tetrathiapentalene)pentacyano-nitroso-iron nitrobenzene solvate.	I.Shevyakova,L.Buravov,V.Tkacheva,L.Zorina,S.Khasanov,S.Simonov,J.Yamada,E.Canadell,R.Shibaeva,E.Yagubskii	ADV.FUNCT.MATER.,2004,14,,660	P-1	0D	6	A*M1)6	1,6M7-1	octahedron	|Fe|	|3|	|6|	|C6|	0
NAPJAQ	C25 H16 Fe1 N6 O1 S16	bis(2,5-bis(1,3-Dithiolan-2-ylidene)-1,3,4,6-tetrathiapentalene)trans-pentacyano-nitroso-iron.	I.Shevyakova,L.Buravov,V.Tkacheva,L.Zorina,S.Khasanov,S.Simonov,J.Yamada,E.Canadell,R.Shibaeva,E.Yagubskii	ADV.FUNCT.MATER.,2004,14,,660	P-1	0D	6	A*M1)6	1,6M7-1	octahedron	|Fe|	|3|	|6|	|C6|	0
NAYWOZ	C38 H72 N13 Ti1/Distance=2.30A(Set #1)	Tetraethylammonium hexacyano-titanium(iii) acetonitrile solvate.	W.R.Entley,C.R.Treadway,S.R.Wilson,G.S.Girolami	J.AM.CHEM.SOC.,1997,119,,6251	I2/a	0D	6	A*M1)6	1,6M7-1	octahedron	|Ti|	|3|	|6|	|C6|	0
NEGGOX	C16.3 H25.2 Mn3 N8 O1.3/Distance=2.20A(Set #1)	catena-(Tetraethylammonium heptakis(\m~2~-cyano)-tri-manganese(ii) methanolsolvate).	C.M.Kareis,J.-H.Her,P.W.Stephens,J.G.Moore,J.S.Miller	Chem.-Eur.J.,2012,18,,9281	R-3m	3D	2.33	A)3*B2)7	fsh 4,6-conn	octahedron & tetrahedron	|Mn|	|2|	|4|6|	|CN3|C6|	1
NEYYIZ	C14 H24 Cr1 N8 Rb1/Distance=2.10A(Set #1)	catena-(bis(Tetramethylammonium) hexakis(\m~2~-cyano)-chromium(iii)-rubidium).	M.Schwarten,B.Ziegler,M.Witzel,D.Babel	Z.NATURFORSCH.,B:CHEM.SCI.,1997,52,,391	R-3m	0D	6	A*M1)6	1,6M7-1	octahedron	|Cr|	|3|	|6|	|C6|	0
NEYYOF	C14 H24 Cr1 N8 Tl1/Distance=2.10A(Set #1)	catena-(bis(Tetramethylammonium) hexakis(\m~2~-cyano)-chromium(iii)-thallium).	M.Schwarten,B.Ziegler,M.Witzel,D.Babel	Z.NATURFORSCH.,B:CHEM.SCI.,1997,52,,391	R-3m	0D	6	A*M1)6	1,6M7-1	octahedron	|Cr|	|3|	|6|	|C6|	0
NEYZAS	(N(CH3)4)2Tl(Fe(CN)6)	catena-(bis(Tetramethylammonium) hexakis(\m~2~-cyano)-iron(iii)-thallium).	Schwarten M.,Ziegler B.,Witzel M.,Babel D.	Z.NATURFORSCH.,B:CHEM.SCI.,1997,52,,391	C2/c	0D	6	A*M1)6	1,6M7-1	octahedron	|Fe|	|3|	|6|	|C6|	0	-
NIKCOA	C42 H44 Fe1 N9 O4	tris(1-Benzylpyridinium) hexacyano-iron(iii) tetrahydrate.	Qiao-Yun Du,Ling-Yun Xin,Yun-Ping Li	Jiegou Huaxue(Chin.J.Struct.Chem.),2007,26,,850	P21/c	0D	6	A*M1)6	1,6M7-1	octahedron	|Fe|	|3|	|6|	|C6|	0	-
NIXWEX	C36 H72 N6 Pt1	bis(Tetra-n-butylammonium) tetracyano-platinum(ii).	D.Shiota,N.Matsushita	Chem.Lett.,2008,37,,398	Cmca	0D	4	A*M1)4	1,4M5-1	square	|Pt|	|2|	|4|	|C4|	0	-
NOCLOG	C78 H66 Ba2 Cl1 Fe1 N18 O9/Distance=2.00A(Set #1)	catena-(bis(\m~2~-Aqua)-bis(\m~2~-cyano-C,N)-tetra-aqua-tetracyano-tetrakis(1, 10-phenanthroline-N,N')-di-barium-iron chloride bis(1,10-phenanthroline)trihydrate).	N.K.Karan,S.Mitra,G.Rosair,D.J.Jenkins,K.M.A.Malik	Inorg.Chem.Commun.,2001,4,,712	P-1	0D	6	A*M1)6	1,6M7-1	octahedron	|Fe|	|3|	|6|	|C6|	0
NOQROB	C16 H27 Ba1 N6 O4.5 Pt1/Distance=2.10A(Set #1)	catena-[tris(\m~2~-Cyano)-cyano-(1,4,10,13-tetraoxa-7,16-diazacyclooctadecane)-barium(ii)-platinum(ii) hemihydrate].	M.M.Olmstead,C.M.Beavers,L.Paw U	ACTA CRYSTALLOGR.,SECT.E:STRUCT.REP.ONLINE,2009,65,,m408	P21/n	0D	4	A*M1)4	1,4M5-1	square	|Pt|	|2|	|4|	|C4|	0
NUXXOT01	C36 H67 Fe1 N12 O8	2,4,6-tris(1,4-Diazabicyclo(2.2.2)octane-N-methyl)mesitylenehexacyano-iron(iii) octahydrate.	A.M.Christofi,P.J.Garratt,G.Hogarth,A.J.Ibbett,Yu-Fai Ng,J.W.Steed	TETRAHEDRON,2002,58,,4543	P21/n	0D	6	A*M1)6	1,6M7-1	octahedron	|Fe|	|3|	|6|	|C6|	0	-
OFATEV	C54 H56 Co1 N7 O2 S32	\k-tetrakis(bis(Ethylenedithio)tetrathiafulvalene) tetraethylammoniumhexacyano-cobalt(iii) dihydrate.	A.Ota,L.Ouahab,S.Golhen,Y.Yoshida,M.Maesato,G.Saito,R.Swietlik	Chem.Mater.,2007,19,,2455	P2/n	0D	6	A*M1)6	1,6M7-1	octahedron	|Co|	|3|	|6|	|C6|	0	-
OFATEV02	C54 H56 Co1 N7 O2 S32	\k-tetrakis(bis(Ethylenedithio)tetrathiafulvalene) tetraethylammoniumhexacyano-cobalt(iii) dihydrate.	A.Ota,L.Ouahab,S.Golhen,Y.Yoshida,M.Maesato,G.Saito,R.Swietlik	Chem.Mater.,2007,19,,2455	P2/n	0D	6	A*M1)6	1,6M7-1	octahedron	|Co|	|3|	|6|	|C6|	0	-
OFATIZ	C54 H56 Fe1 N7 O2 S32	\k-tetrakis(bis(Ethylenedithio)tetrathiafulvalene) tetraethylammoniumhexacyano-iron(iii) dihydrate.	A.Ota,L.Ouahab,S.Golhen,Y.Yoshida,M.Maesato,G.Saito,R.Swietlik	Chem.Mater.,2007,19,,2455	P2/n	0D	6	A*M1)6	1,6M7-1	octahedron	|Fe|	|3|	|6|	|C6|	0	-
OFATIZ02	C54 H56 Fe1 N7 O2 S32	\k-tetrakis(bis(Ethylenedithio)tetrathiafulvalene) tetraethylammoniumhexacyano-iron(iii) dihydrate.	A.Ota,L.Ouahab,S.Golhen,Y.Yoshida,M.Maesato,G.Saito,R.Swietlik	Chem.Mater.,2007,19,,2455	P2/n	0D	6	A*M1)6	1,6M7-1	octahedron	|Fe|	|3|	|6|	|C6|	0	-
OLACIN	C28 H24 Cu3 N27 O4 W3/Distance=2.30A(Set #1)	catena-(Diethylenetriammoniumtris(pentakis(\m~2~-cyano)-tricyano-copper(ii)-tungsten(v)) tetrahydrate).	Korzeniak T.,Podgajny R.,Alcock N.W.,Lewinski K.,Balanda M.,Wasiutynski T.,Sieklucka B.	POLYHEDRON,2003,22,,2183	Cmc21	2D	4	A)2*B2)5*M1)3	SP 2-periodic net (4,4)Ia; SnS	square antiprism & square pyramid	|Cu|W|	|2|5|	|5|8|	|N5|C8|	1
OSINUA	C51 H98 K3 N6 O22 Os1/Distance=2.10A(Set #1)	bis(\m~2~-cyano)-bis(18-crown-6)-tetracyano-di-potassium-osmium(iii)(18-crown-6)-(propan-2-ol)-potassium propan-2-ol solvate monohydrate.	K.E.Vostrikova,E.V.Peresypkina	EUR.J.INORG.CHEM.,2011,,,811	P-1	0D	6	A*M1)6	1,6M7-1	octahedron	|Os|	|3|	|6|	|C6|	0
OTEVUF	C20 H36 Au1 N5	tetra-n-butylammonium tetracyano-gold.	A.R.Geisheimer,J.E.C.Wren,V.K.Michaelis,M.Kobayashi,K.Sakai,S.Kroeker,D.B.Leznoff	INORG.CHEM.,2011,50,,1265	P21/n	0D	4	A*M1)4	1,4M5-1	square	|Au|	|3|	|4|	|C4|	0	-
OTEWAM	C28 H20 As1 Au1 N4	tetraphenylarsonium tetracyano-gold.	A.R.Geisheimer,J.E.C.Wren,V.K.Michaelis,M.Kobayashi,K.Sakai,S.Kroeker,D.B.Leznoff	INORG.CHEM.,2011,50,,1265	P-1	0D	4	A*M1)4	1,4M5-1	square	|Au|	|3|	|4|	|C4|	0	-
OTEWEQ	C40 H30 Au1 N5 P2	bis(triphenylphosphine)iminium tetracyano-gold.	A.R.Geisheimer,J.E.C.Wren,V.K.Michaelis,M.Kobayashi,K.Sakai,S.Kroeker,D.B.Leznoff	INORG.CHEM.,2011,50,,1265	P21/c	0D	4	A*M1)4	1,4M5-1	square	|Au|	|3|	|4|	|C4|	0	-
OVIWUM	C17 H27 Cu4 N11/Distance=2.20A(Set #1)	catena-(1-methylpiperazine-1,4-diium 1-methylpiperazin-1-iumbis(\m~3~-cyanido)-pentakis(\m~2~-cyanido)-tetra-copper(i)).	Ying-Lian Qin,Juan-Juan Hou,Jin Lv,Xian-Ming Zhang	CRYST.GROWTH DES.,2011,11,,3101	Pnnm	3D	1.75	A)4*B3)2*B2)5	3,4,4T105	tetrahedron	|Cu|	|1|	|4|	|C2N2|C3N|	1
OVIXAT	C19 H31 Cu4 N11/Distance=2.20A(Set #1)	catena-(1-ethylpiperazine-1,4-diium 1-ethylpiperazin-1-iumbis(\m~3~-cyanido)-pentakis(\m~2~-cyanido)-tetra-copper(i)).	Ying-Lian Qin,Juan-Juan Hou,Jin Lv,Xian-Ming Zhang	CRYST.GROWTH DES.,2011,11,,3101	Pnnm	3D	1.75	A)4*B3)2*B2)5	3,4,4T105	tetrahedron	|Cu|	|1|	|4|	|C2N2|C3N|	1
OVUMAU	C6 H12 Fe1 N8 O2 Sr1/Distance=2.00A(Set #1)	catena-[bis(Ammonium) hexakis(\m~2~-cyano)-diaqua-iron(ii)-strontium(ii)].	L.M.Corodoba,J.A.Moran,S.Santos,O.E.Piro,M.I.Gomez	J.Chem.Cryst.,2011,41,,1280	Pnma	0D	6	A*M1)6	1,6M7-1	octahedron	|Fe|	|2|	|6|	|C6|	0
OVUNUP	C38 H40 N6 O2 Pt1	bis(4-((4-Ethynylbicyclo[2.2.2]octanyl)ethynyl)pyridinium)tetracyano-platinum(ii) dihydrate.	C.Lemouchi,A.-L.Barres,C.Meziere,D.Rondeau,L.Zorina,P.Wzietek,P.Batail	DALTON TRANS.,2011,40,,8075	P21/c	0D	4	A*M1)4	1,4M5-1	square	|Pt|	|2|	|4|	|C4|	0	-
OYUKAV	C19 H21 Au1 N4	4-(2-(4-(Diethylamino)phenyl)ethenyl)pyridinium dicyano-gold(i).	P.G.Lacroix,M.C.Munoz,A.B.Gaspar,J.A.Real,S.Bonhommeau,V.Rodriguez,K.Nakatani	J.MATER.CHEM.,2011,21,,15940	Cc	0D	2	A*M1)2	1,2M3-1	linear	|Au|	|1|	|2|	|C2|	0	-
OYUKEZ	C21 H23 Au1 N4 O1	4-(2-(4-(2-(Methoxymethyl)pyrrolidin-1-yl)phenyl)ethenyl)pyridiniumdicyano-gold(i).	P.G.Lacroix,M.C.Munoz,A.B.Gaspar,J.A.Real,S.Bonhommeau,V.Rodriguez,K.Nakatani	J.MATER.CHEM.,2011,21,,15940	P1	0D	2	A*M1)2	1,2M3-1	linear	|Au|	|1|	|2|	|C2|	0	-
PACCOL	C24 H50 N8 Ni1	10-Aminodecylammonium tetracyano-nickel(ii).	M.Hashimoto,T.Iwamoto	J.Coord.Chem.,1991,23,,269	P-1	0D	4	A*M1)4	1,4M5-1	square	|Ni|	|2|	|4|	|C4|	0	-
PACCUR	C32 H64 N6 Ni1 O14	18-Crown-6 2-hydroxyethylammonium clathrate tetracyano-nickel(ii).	M.Hasimoto,T.Iwamoto	J.Coord.Chem.,1991,23,,269	P21/n	0D	4	A*M1)4	1,4M5-1	square	|Ni|	|2|	|4|	|C4|	0	-
PAHCUW	C40 H64 N30 O2 Pt5	1,4,7,10,13,16,19,22,25,28-Deca-azoniacyclotriacontanepentakis(tetracyano-platinum) dihydrate.	A.Bencini,A.Bianchi,P.Dapporto,E.Garcia-Espana,M.Micheloni,J.A.Ramirez,P.Paoletti,P.Paoli	INORG.CHEM.,1992,31,,1902	P-1	0D	4	A*M1)4	1,4M5-1	square	|Pt|	|2|	|4|	|C4|	0	-
PAZHIJ	C36 H43 Fe1 N8 O4/Distance=2.00A(Set #1)	N,N,N',N'-Tetrabenzyl-ethylenediaminium oxonium hexacyano-iron trihydrate.	Fang Guo,Lei Li,Yi-Ning Zhang,Jian Tong,Chun-Liang Song,Fang Xia,Wen-Sheng Guo	SUPRAMOL.CHEM.,2012,24,,415	P-1	0D	6	A*M1)6	1,6M7-1	octahedron	|Fe|	|3|	|6|	|C6|	0
PAZHUV	C80 H84 Cl1 Fe1 N10 O3	N,N'-(1,4-Phenylenebis(methylene))bis(N-benzyl(phenyl)methanaminium) chloridehexakis(cyano)ferrate ethane-1,2-diol monohydrate.	Fang Guo,Lei Li,Yi-Ning Zhang,Jian Tong,Chun-Liang Song,Fang Xia,Wen-Sheng Guo	SUPRAMOL.CHEM.,2012,24,,415	Pc	0D	6	A*M1)6	1,6M7-1	octahedron	|Fe|	|3|	|6|	|C6|	0	-
PAZJEH	C40 H47 Fe1 N8 O2.25/Distance=2.00A(Set #1)	N,N,N',N'-Tetrabenzyl-ethylenediaminium oxonium hexacyano-iron ethanoltetrahydrofuran clathrate.	Fang Guo,Lei Li,Yi-Ning Zhang,Jian Tong,Chun-Liang Song,Fang Xia,Wen-Sheng Guo	SUPRAMOL.CHEM.,2012,24,,415	P-1	0D	6	A*M1)6	1,6M7-1	octahedron	|Fe|	|3|	|6|	|C6|	0
PCAUPY	C12 H8 Au1 K1 N4/Distance=2.10A(Set #1)	2,2'-Bipyridyl potassium dicyano-gold(i).	P.G.Jones,W.Clegg,G.M.Sheldrick	ACTA CRYSTALLOGR.,SECT.B:STRUCT.CRYSTALLOGR.CRYST.CHEM.,1980,36,,160	P21	0D	2	A*M1)2	1,2M3-1	linear	|Au|	|1|	|2|	|C2|	0
PEBKIQ	C76 H60 Mn1 N6 P4	bis(bis(Triphenylphosphine)iminium) tetracyano-manganese(ii).	W.E.Buschmann,A.M.Arif,J.S.Miller	Angew.Chem.,Int.Ed.,1998,37,,781	C2/c	0D	4	A*M1)4	1,4M5-1	tetrahedron	|Mn|	|2|	|4|	|C4|	0	-
PECMOZ	C28 H29 N12 O4.5 W1/Distance=2.20A(Set #1)	bis(4,4'-Bipyridinium) octacyanotungstate(iv) hydrate.	N.W.Alcock,A.Samotus,J.Szklarzewicz	J.CHEM.SOC.,DALTON TRANS.,1993,,,885	P21/c	0D	8	A*M1)8	1,8M9-1	square antiprism	|W|	|4|	|8|	|C8|	0
PEQMOO	C90 H132 Co2 N24	tris(1,4-bis(5,5-Di-n-propyl-3,4,5,6-tetrahydropyrimidinium-2-yl)benzene)bis(hexacyano-cobalt(iii)).	P.Dechambenoit,S.Ferlay,M.W.Hosseini,J.-M.Planeix,N.Kyritsakas	New J.Chem.,2006,30,,1403	P-3	0D	6	A*M1)6	1,6M7-1	octahedron	|Co|	|3|	|6|	|C6|	0	-
PEQMUU	C90 H132 Cr2 N24	tris(1,4-bis(5,5-Di-n-propyl-3,4,5,6-tetrahydropyrimidinium-2-yl)benzene)bis(hexacyano-chromium(iii)).	P.Dechambenoit,S.Ferlay,M.W.Hosseini,J.-M.Planeix,N.Kyritsakas	New J.Chem.,2006,30,,1403	P-3	0D	6	A*M1)6	1,6M7-1	octahedron	|Cr|	|3|	|6|	|C6|	0	-
PEQNAB	C90 H132 Fe2 N24	tris(1,4-bis(5,5-Di-n-propyl-3,4,5,6-tetrahydropyrimidinium-2-yl)benzene)bis(hexacyano-iron(iii)).	P.Dechambenoit,S.Ferlay,M.W.Hosseini,J.-M.Planeix,N.Kyritsakas	New J.Chem.,2006,30,,1403	P-3	0D	6	A*M1)6	1,6M7-1	octahedron	|Fe|	|3|	|6|	|C6|	0	-
PEQNIJ	C30 H44 N8 Ni1	1,4-bis(5,5-Di-n-propyl-3,4,5,6-tetrahydropyrimidinium-2-yl)benzenetetracyano-nickel(ii).	P.Dechambenoit,S.Ferlay,M.W.Hosseini,J.-M.Planeix,N.Kyritsakas	New J.Chem.,2006,30,,1403	P-1	0D	4	A*M1)4	1,4M5-1	square	|Ni|	|2|	|4|	|C4|	0	-
PEQNOP	C30 H44 N8 Pd1	1,4-bis(5,5-Di-n-propyl-3,4,5,6-tetrahydropyrimidinium-2-yl)benzenetetracyano-palladium(ii).	P.Dechambenoit,S.Ferlay,M.W.Hosseini,J.-M.Planeix,N.Kyritsakas	New J.Chem.,2006,30,,1403	P-1	0D	4	A*M1)4	1,4M5-1	square	|Pd|	|2|	|4|	|C4|	0	-
PEQNUV	C30 H44 N8 Pt1	1,4-bis(5,5-Di-n-propyl-3,4,5,6-tetrahydropyrimidinium-2-yl)benzenetetracyano-platinum(ii).	P.Dechambenoit,S.Ferlay,M.W.Hosseini,J.-M.Planeix,N.Kyritsakas	New J.Chem.,2006,30,,1403	P-1	0D	4	A*M1)4	1,4M5-1	square	|Pt|	|2|	|4|	|C4|	0	-
PICYCO	C36 H26 Cl4 Co1 N5 O4/Distance=1.90A(Set #1)	pentakis(Phenyl-isocyanide)-cobalt(i) perchlorate chloroform solvate.	L.D.Brown,D.R.Greig,K.N.Raymond	INORG.CHEM.,1975,14,,645	P21/m	0D	5	A*M1)5	1,5M6-1	square pyramid	|Co|	|1|	|5|	|C5|	0
PILFAR	C12 H8 Au1 N2 O1 S6 Se2	2-(5,6-Dihydro-1,3-diseleno(4,5-d)(1,4)dithiine-2-ylidene)-1,3-dithiolo(4,5-d)(1,3,6)oxadithiepine dicyano-gold.	T.Naito,A.Tateno,T.Udagawa,H.Kobayashi,R.Kato,A.Kobayashi,T.Nogami	J.CHEM.SOC.,FARADAY TRANS.,1994,90,,763	P21/c	0D	2	A*M1)2	1,2M3-1	linear	|Au|	|1|	|2|	|C2|	0	-
PIYZAZ	C2 Cd1 N5.84/Distance=2.20A(Set #1)	catena-(bis(\m~2~-Cyano-C,N)-cadmium dinitrogen solvate).	A.E.Phillips,A.L.Goodwin,G.J.Halder,P.D.Southon,C.J.Kepert	Angew.Chem.,Int.Ed.,2008,47,,1396	Fd-3m	3D	2	A*B2)2	dia Diamond; 4/6/c1; sqc6	tetrahedron	|Cd|	|2|	|4|	|C4|	1
PIYZED01	C2 Cd1 N2/Distance=2.20A(Set #1)	catena-(bis(\m~2~-Cyano-C,N)-cadmium).	A.E.Phillips,A.L.Goodwin,G.J.Halder,P.D.Southon,C.J.Kepert	Angew.Chem.,Int.Ed.,2008,47,,1396	Fd-3m	3D	2	A*B2)2	dia Diamond; 4/6/c1; sqc6	tetrahedron	|Cd|	|2|	|4|	|C4|	1
POFSIN03	C2.64 Cd1 Cl2.56 N2	catena-(bis(\m~2~-Cyano-C,N)-cadmium carbon tetrachloride clathrate).	A.E.Phillips,A.L.Goodwin,G.J.Halder,P.D.Southon,C.J.Kepert	,2008,47,,1396	Fd-3m	3D	2	A*B2)2	dia Diamond; 4/6/c1; sqc6	tetrahedron	|Cd|	|2|	|4|	|C4|	1
POFSIN04	C2.64 Cd1 Cl2.56 N2/Distance=2.20A(Set #1)	catena-(bis(\m~2~-Cyano-C,N)-cadmium carbon tetrachloride clathrate).	A.E.Phillips,A.L.Goodwin,G.J.Halder,P.D.Southon,C.J.Kepert	Angew.Chem.,Int.Ed.,2008,47,,1396	Fd-3m	3D	2	A*B2)2	dia Diamond; 4/6/c1; sqc6	tetrahedron	|Cd|	|2|	|4|	|C4|	1
PURLEU	C58 H100 Fe1 N14 O6	bis(2,2'-(1,4-Phenylene)bis(5,5-dipropyl-3,4,5,6-tetrahydropyrimidin-1-ium))hexacyano-iron(ii) hexahydrate.	P.Dechambenoit,S.Ferlay,N.Kyritsakas,M.W.Hosseini	CHEM.COMMUN.,2010,46,,868	P-1	0D	6	A*M1)6	1,6M7-1	octahedron	|Fe|	|2|	|6|	|C6|	0	-
PURLIY	C90 H132 Cs2 Fe2 N24/Distance=2.00A(Set #1)	catena-[tris(2,2'-(1,4-Phenylene)bis(5,5-dipropyl-3,4,5,6-tetrahydropyrimidin-1-ium)) dodecakis(\m~2~-cyano-C,N)-di-cesium-di-iron(ii)].	P.Dechambenoit,S.Ferlay,N.Kyritsakas,M.W.Hosseini	CHEM.COMMUN.,2010,46,,868	P-3	0D	6	A*M1)6	1,6M7-1	octahedron	|Fe|	|2|	|6|	|C6|	0
PURLOE	C90 H132 Fe2 K2 N24	catena-[tris(2,2'-(1,4-Phenylene)bis(5,5-dipropyl-3,4,5,6-tetrahydropyrimidin-1-ium)) dodecakis(\m~2~-cyano-C,N)-di-iron(ii)-di-potassium].	Dechambenoit P.,Ferlay S.,Kyritsakas N.,Hosseini M.W.	CHEM.COMMUN.,2010,46,,868	P-3	0D	6	A*M1)6	1,6M7-1	octahedron	|Fe|	|2|	|6|	|C6|	0	-
PURLUK	C90 H132 K2 N24 Ru2	catena-[tris(2,2'-(1,4-Phenylene)bis(5,5-dipropyl-3,4,5,6-tetrahydropyrimidin-1-ium)) dodecakis(\m~2~-cyano-C,N)-di-potassium-di-ruthenium].	Dechambenoit P.,Ferlay S.,Kyritsakas N.,Hosseini M.W.	CHEM.COMMUN.,2010,46,,868	P-3	0D	6	A*M1)6	1,6M7-1	octahedron	|Ru|	|3|	|6|	|C6|	0	-
PURMAR	C90 H132 Fe2 N24 Na2	catena-[tris(2,2'-(1,4-Phenylene)bis(5,5-dipropyl-3,4,5,6-tetrahydropyrimidin-1-ium)) dodecakis(\m~2~-cyano-C,N)-di-iron(ii)-di-sodium].	Dechambenoit P.,Ferlay S.,Kyritsakas N.,Hosseini M.W.	CHEM.COMMUN.,2010,46,,868	P-3	0D	6	A*M1)6	1,6M7-1	octahedron	|Fe|	|2|	|6|	|C6|	0	-
PURMEV	C90 H132 Fe2 N24 Rb2	catena-[tris(2,2'-(1,4-Phenylene)bis(5,5-dipropyl-3,4,5,6-tetrahydropyrimidin-1-ium)) dodecakis(\m~2~-cyano-C,N)-di-iron(ii)-di-rubidium].	Dechambenoit P.,Ferlay S.,Kyritsakas N.,Hosseini M.W.	CHEM.COMMUN.,2010,46,,868	P-3	0D	6	A*M1)6	1,6M7-1	octahedron	|Fe|	|2|	|6|	|C6|	0	-
PUZHIC01	C40 H51 Fe1 N8 O4	N,N,N',N'-Tetrabenzyl-ethylenediaminium oxonium hexacyano-iron bis(ethanol)clathrate monohydrate.	Fang Guo,Lei Li,Yi-Ning Zhang,Jian Tong,Chun-Liang Song,Fang Xia,Wen-Sheng Guo	SUPRAMOL.CHEM.,2012,24,,415	P-1	0D	6	A*M1)6	1,6M7-1	octahedron	|Fe|	|3|	|6|	|C6|	0	-
PYCMOA	C32 H24 Mo1 N12 O8	tetrakis(2-Carboxypyridinium) octacyano-molybdenum(iv).	S.S.Basson,J.G.Leipoldt,A.J.van Wyk	ACTA CRYSTALLOGR.,SECT.B:STRUCT.CRYSTALLOGR.CRYST.CHEM.,1980,36,,2025	P2/n	0D	8	A*M1)8	1,8M9-1	trigonal dodecahedron	|Mo|	|4|	|8|	|C8|	0	-
QAGYEE	C118 H84 Ba2 Fe2 N30 O8/Distance=2.00A(Set #1)	catena-(bis(\m~2~-Cyano-C,N)-bis(\m~2~-nitrosyl-N,O)-diaqua-octacyano-hexakis(1,10-phenanthroline)-di-barium-di-iron 1,10-phenanthroline solvatetetrahydrate).	Yun-Ming Sun,Feng-Ying Dong,Da-Qi Wang,Yan-Tuan Li,Jian-Min Dou	J.Inorg.Organomet.Polym.Mater.,2010,20,,657	P-1	0D	6	A*M1)6	1,6M7-1	octahedron	|Fe|	|3|	|6|	|C6|	0
QAQZUE	C14 H22 Au1 I5 N2/Distance=2.00A(Set #1)	bis(Cyclohexylisocyano)-gold(i) iodide bis(di-iodine).	D.Schneider,O.Schuster,H.Schmidbaur	Organometallics,2005,24,,3547	Cmcm	0D	4	A*M1)4	1,4M5-1	square	|Au|	|3|	|4|	|C4|	0
QEZXUO	C54 H104 Fe2 K2 N18 O25/Distance=2.00A(Set #1)	tris(N,N'-Diethyl-4,4'-bipyridinium) bis(triaqua-potassium)bis(hexacyanoferrate(ii)) nonadecahydrate.	S.A.Kostina,A.B.Ilyukhin,B.V.Lokshin,V.Yu.Kotov	MENDELEEV COMMUN.,2001,,,12	P-3c1	0D	6	A*M1)6	1,6M7-1	octahedron	|Fe|	|3|	|6|	|C6|	0
QEZYAV	C54 H104 K2 N18 O25 Ru2/Distance=2.10A(Set #1)	tris(N,N'-Diethyl-4,4'-bipyridinium) bis(triaqua-potassium)bis(hexacyanoruthenate(ii)) nonadecahydrate.	S.A.Kostina,A.B.Ilyukhin,B.V.Lokshin,V.Yu.Kotov	MENDELEEV COMMUN.,2001,,,12	P-3c1	0D	6	A*M1)6	1,6M7-1	octahedron	|Ru|	|2|	|6|	|C6|	0
QIGMUO	C23 H24 Au1 N2 O1 S4 Se8	trans-trans-eclipse-2,6,8,12-Tetrathia-1,7(2,6)-ditetraselenafulvalena-cyclododecaphane dicyano-gold isopropanol solvate.	Takimiya K.,Oharuda A.,Morikami A.,Aso Y.,Otsubo T.	EUR.J.ORG.CHEM.,2000,,,3013	P-1	0D	2	A*M1)2	1,2M3-1	linear	|Au|	|1|	|2|	|C2|	0	-
QOVNIZ	C16 H28 Ba1 N8 Ni1 O4/Distance=1.90A(Set #1)	catena-(tris(\m~2~-Cyano-C,N)-cyano-tetrakis(dimethylformamide)-barium-nickel).	Errun Ding,M.R.Sturgeon,A.Rath,Xuenian Chen,M.A.Keane,S.G.Shore	INORG.CHEM.,2009,48,,325	P-1	0D	4	A*M1)4	1,4M5-1	square	|Ni|	|2|	|4|	|C4|	0
QOVNOF	C13 H21 Ba1 N7 O3 Pd1/Distance=2.10A(Set #1)	catena-(tetrakis(\m~2~-Cyano-C,N)-tris(dimethylformamide-O)-barium-palladium).	Errun Ding,M.R.Sturgeon,A.Rath,Xuenian Chen,M.A.Keane,S.G.Shore	INORG.CHEM.,2009,48,,325	Cc	0D	4	A*M1)4	1,4M5-1	square	|Pd|	|2|	|4|	|C4|	0
QOVNUL	C13 H21 Ba1 N7 O3 Pt1/Distance=2.10A(Set #1)	catena-(tetrakis(\m~2~-Cyano-C,N)-tris(dimethylformamide-O)-barium-platinum).	Errun Ding,M.R.Sturgeon,A.Rath,Xuenian Chen,M.A.Keane,S.G.Shore	INORG.CHEM.,2009,48,,325	Cc	0D	4	A*M1)4	1,4M5-1	square	|Pt|	|2|	|4|	|C4|	0
QOVPAT	C16 H28 N8 Ni1 O4 Sr1/Distance=1.90A(Set #1)	catena-(tris(\m~2~-Cyano-C,N)-cyano-tetrakis(dimethylformamide)-nickel-strontium).	Errun Ding,M.R.Sturgeon,A.Rath,Xuenian Chen,M.A.Keane,S.G.Shore	INORG.CHEM.,2009,48,,325	P-1	0D	4	A*M1)4	1,4M5-1	square	|Ni|	|2|	|4|	|C4|	0
QOVPEX	C16 H28 N8 O4 Pd1 Sr1/Distance=2.10A(Set #1)	catena-(tris(\m~2~-Cyano-C,N)-cyano-tetrakis(dimethylformamide)-palladium-strontium).	Errun Ding,M.R.Sturgeon,A.Rath,Xuenian Chen,M.A.Keane,S.G.Shore	INORG.CHEM.,2009,48,,325	P-1	0D	4	A*M1)4	1,4M5-1	square	|Pd|	|2|	|4|	|C4|	0
QOVPIB	C16 H28 N8 O4 Pt1 Sr1/Distance=2.10A(Set #1)	catena-(tris(\m~2~-Cyano-C,N)-cyano-tetrakis(dimethylformamide)-platinum(ii)-strontium).	Errun Ding,M.R.Sturgeon,A.Rath,Xuenian Chen,M.A.Keane,S.G.Shore	INORG.CHEM.,2009,48,,325	P-1	0D	4	A*M1)4	1,4M5-1	square	|Pt|	|2|	|4|	|C4|	0
QOWMIY	C36 H23 Au1 Cl1 N2 O2 S4	1,2-bis(2-Hydroxyphenyl)-1,2-bis(benzo-1,3-dithiol-2-ylidene)ethanedicyano-aurate(i) chlorobenzene solvate.	Y.Yamashita,M.Tomura,K.Imaeda	TETRAHEDRON LETT.,2001,42,,4191	C2/c	0D	2	A*M1)2	1,2M3-1	linear	|Au|	|1|	|2|	|C2|	0	-
QQQAAI01	C16 H14 N6 Pt1	N,N'-Dimethyl-4,4'-dipyridinium tetracyano-platinum(ii).	D.Shiota,N.Matsushita	Chem.Lett.,2008,37,,398	P21/n	0D	4	A*M1)4	1,4M5-1	square	|Pt|	|2|	|4|	|C4|	0	-
RAKFEO	C16 H15 K1 N12 O2 W1/Distance=2.20A(Set #1)	Hydroxonium potassium bis(pyrazinium) octacyanotungstate(iv) monohydrate.	D.Matoga,J.Szklarzewicz,A.Samotus,J.Burgess,J.Fawcett,D.R.Russell	TRANSITION MET.CHEM.,2001,26,,404	P21/n	0D	8	A*M1)8	1,8M9-1	square antiprism	|W|	|4|	|8|	|C8|	0
RECSAU	C6 H7 Au1 N4	3-Methylimidazolium dicyano-gold(i).	Y.Yoshida,J.Fujii,G.Saito,T.Hiramatsu,N.Sato	J.MATER.CHEM.,2006,16,,724	P-1	0D	2	A*M1)2	1,2M3-1	linear	|Au|	|1|	|2|	|C2|	0	-
RECSEY	(C6H11N2)Au(CN)2	1-Ethyl-3-methylimidazolium dicyano-gold(i).	Yoshida Y.,Fujii J.,Saito G.,Hiramatsu T.,Sato N.	J.MATER.CHEM.,2006,16,,724	P21/c	0D	2	A*M1)2	1,2M3-1	linear	|Au|	|1|	|2|	|C2|	0	-
RECSOI	C25 H16 Fe1 N6 O1 S16/Distance=2.00A(Set #2)	\b''-bis(bis(Ethylenedithio)tetrathiafulvalene) pentacyano-nitroso-iron.	S.V.Simonov,L.V.Zorina,S.S.Khasanov,R.P.Shibaeva,I.Yu.Shevyakova,L.I.Buravov,E.B.Yagubskii,E.Canadell	J.MATER.CHEM.,2006,16,,787	P-1	0D	6	A*M1)6	1,6M7-1	octahedron	|Fe|	|3|	|6|	|C6|	0
RELSOS	C44 H24 N4 Pt1 S32	tetrakis((4,5-Ethylenedithio-4',5'-vinylenedithio)tetrathiafulvalene)tetracyano-platinum(ii).	A.D.Dubrovskii,N.G.Spitsina,A.N.Chekhlov,O.A.Dyachenko,L.I.Buravov,A.A.Lobach,J.V.Gancedo,C.Rovira	Synth.Met.,2004,140,,171	P21/m	0D	4	A*M1)4	1,4M5-1	square	|Pt|	|2|	|4|	|C4|	0	-
REVYOG	C78 H60 Mn1 N8 P4	bis(bis(Triphenylphosphino)iminium) hexacyano-manganate(iv).	W.E.Buschmann,C.Vazquez,M.D.Ward,N.C.Jones,J.S.Miller	CHEM.COMMUN.,1997,,,409	P21/n	0D	6	A*M1)6	1,6M7-1	octahedron	|Mn|	|4|	|6|	|C6|	0	-
REYWIB	C38 H32 Au1 N2 S24	bis(2-(4,5-Cyclohexylenedithio-1,3-dithiol-2-ylidene)-5-(4,5-bis(methylthio)-1,3-dithiol-2-ylidene)-1,3,4,6-tetrathiapentalene) dicyano-gold.	M.Ashizawa,M.Aragaki,T.Mori,Y.Misaki,T.Yamabe	Chem.Lett.,1997,,,649	P-1	0D	2	A*M1)2	1,2M3-1	linear	|Au|	|1|	|2|	|C2|	0	-
REYWIB01	C38 H32 Au1 N2 S24	bis(2-(4,5-Cyclohexylenedithio-1,3-dithiol-2-ylidene)-5-(4,5-bis(methylthio)-1,3-dithiol-2-ylidene)-1,3,4,6-tetrathiapentalene) dicyano-gold.	T.Kawamoto,M.Ashizawa,T.Mori,J.-I.Yamaura,R.Kato,Y.Misaki,K.Tanaka	BULL.CHEM.SOC.JPN.,2002,75,,435	P-1	0D	2	A*M1)2	1,2M3-1	linear	|Au|	|1|	|2|	|C2|	0	-
RIFLEY	C24 H20 Fe1 N10	bis(1-Methylquinolinium) bis(hydrogen isocyanide)-tetracyano-iron(ii).	S.I.Gorelsky,A.B.Ilyukhin,P.V.Kholin,V.Yu.Kotov,B.V.Lokshin,N.V.Sapoletova	INORG.CHIM.ACTA,2007,360,,2573	P21/c	0D	6	A*M1)6	1,6M7-1	octahedron	|Fe|	|2|	|6|	|C6|	0	-
RIFLUO	C16 H18 Fe1 N8 O2/Distance=2.00A(Set #1)	bis(Oxonium) bis(pyridinium) hexacyano-iron(ii).	S.I.Gorelsky,A.B.Ilyukhin,P.V.Kholin,V.Yu.Kotov,B.V.Lokshin,N.V.Sapoletova	INORG.CHIM.ACTA,2007,360,,2573	P21/n	0D	6	A*M1)6	1,6M7-1	octahedron	|Fe|	|2|	|6|	|C6|	0
RIFMAV	C26 H24 Fe1 N10 O2/Distance=2.00A(Set #1)	bis(2,2'-Pyridylpyridinium) bis(oxonium) hexacyano-iron(ii).	S.I.Gorelsky,A.B.Ilyukhin,P.V.Kholin,V.Yu.Kotov,B.V.Lokshin,N.V.Sapoletova	INORG.CHIM.ACTA,2007,360,,2573	P21/n	0D	6	A*M1)6	1,6M7-1	octahedron	|Fe|	|2|	|6|	|C6|	0
RIFMEZ	C20 H28 Fe1 N8 O4/Distance=2.00A(Set #1)	Butane-1,4-dipyridinium bis(oxonium) hexacyano-iron(ii) dihydrate.	S.I.Gorelsky,A.B.Ilyukhin,P.V.Kholin,V.Yu.Kotov,B.V.Lokshin,N.V.Sapoletova	INORG.CHIM.ACTA,2007,360,,2573	C2/c	0D	6	A*M1)6	1,6M7-1	octahedron	|Fe|	|2|	|6|	|C6|	0
RIFMID	C26 H27 Fe1 N10 O4	2,2'-Bipyridinium 2,2'-pyridylpyridinium hexacyano-iron(iii) tetrahydrate.	S.I.Gorelsky,A.B.Ilyukhin,P.V.Kholin,V.Yu.Kotov,B.V.Lokshin,N.V.Sapoletova	INORG.CHIM.ACTA,2007,360,,2573	Pn	0D	6	A*M1)6	1,6M7-1	octahedron	|Fe|	|3|	|6|	|C6|	0	-
RIGGIY	Hg2(CN)4*C16H10	bis(dicyano-mercury(ii)) pyrene clathrate.	Gervasio G.,Marabello D.	ACTA CRYSTALLOGR.,SECT.C:CRYST.STRUCT.COMMUN.,2007,63,,m318	Cmc21	0D	2	A*M1)2	1,2M3-1	linear	|Hg|	|2|	|2|	|C2|	0	-
ROMSIW	C64 H116 Au8 Ba4 N24 O22/Distance=2.00A(Set #1)	catena-(octakis(\m~2~-Cyanido-C,N)-hexa-aqua-octacyanido-tetrakis(1,4,10,13-tetraoxa-7,16-diazacyclo-octadecane)-tetra-barium(ii)-octa-gold(i)).	C.M.Beavers,L.Paw U,M.M.Olmstead	ACTA CRYSTALLOGR.,SECT.E:STRUCT.REP.ONLINE,2009,65,,m300	P-1	0D	2	A*M1)2	1,2M3-1	linear	|Au|	|1|	|2|	|C2|	0
RONWIA	C19 H33 Cu4 N13/Distance=2.80A(Set #1);Distance=0.00A(Set #1);Distance=0.00A(Set #1);Distance=0.00A(Set #1)	catena-bis((N-(2-Aminoethyl)piperazine) heptakis(\m~2~-cyano)-tetra-copper(i)).	H.Yuge,T.Iwamoto	J.Inclusion Phenom.Mol.Recog.Chem.,1996,26,,119	P2/n	3D	1.75	A)4*B3)2*B2)5	3,4,4T78	tetrahedron	|Cu|	|1|	|4|	|C4|C3N|	1
RONZID	C5 H6 Cd1 N2 O3/Distance=3.20A(Set #2)	catena-(bis(\m~2~-Cyano)-cadmium dimethyl carbonate clathrate).	T.Kitazawa	J.Inclusion Phenom.Mol.Recog.Chem.,1996,26,,153	P41212	3D	2	A*B2)2	dia Diamond; 4/6/c1; sqc6	tetrahedron	|Cd|	|2|	|4|	|C2N2|	1
SADYAZ	C13 H20 Ag1 Br1 N4	2-Bromo-1,3-di-isopropyl-4,5-dimethyl-1H-imidazol-3-ium bis(cyano)-silver.	E.Mallah,K.Sweidan,Q.Abu-Salem,W.A.Dayyih,M.Steimann	ACTA CRYSTALLOGR.,SECT.E:STRUCT.REP.ONLINE,2012,68,,m17	P212121	0D	2	A*M1)2	1,2M3-1	linear	|Ag|	|1|	|2|	|C3|	0	-
SAJRAW	C3 Cd1 Cl4 N2/Distance=2.20A(Set #1)	catena-(bis(\m~2~-Cyano)-cadmium carbon tetrachloride clathrate).	T.Kitazawa,S.-I.Nishikiori,R.Kuroda,T.Iwamoto	Chem.Lett.,1988,,,1729	Fd3m	3D	2	A*B2)2	dia Diamond; 4/6/c1; sqc6	tetrahedron	|Cd|	|2|	|4|	|C4|	1
SAKNAU	C14 H10 N6 Pt1	4,4'-Bipyridinium tetracyano-platinum.	P.C.Crawford,A.L.Gillon,J.Green,A.G.Orpen,T.J.Podesta,S.V.Pritchard	CRYSTENGCOMM,2004,6,,419	P21/c	0D	4	A*M1)4	1,4M5-1	square	|Pt|	|2|	|4|	|C4|	0	-
SAKNEY	C14 H14 N6 O2 Pt1	4,4'-Bipyridinium tetracyano-platinum dihydrate.	P.C.Crawford,A.L.Gillon,J.Green,A.G.Orpen,T.J.Podesta,S.V.Pritchard	CRYSTENGCOMM,2004,6,,419	P21/c	0D	4	A*M1)4	1,4M5-1	square	|Pt|	|2|	|4|	|C4|	0	-
SAKNIC	C18 H28 N8 Pt1	4,4'-Bi-piperidinium tetracyano-platinum acetonitrile solvate.	P.C.Crawford,A.L.Gillon,J.Green,A.G.Orpen,T.J.Podesta,S.V.Pritchard	CRYSTENGCOMM,2004,6,,419	P21/c	0D	4	A*M1)4	1,4M5-1	square	|Pt|	|2|	|4|	|C4|	0	-
SAPVAH	C52 H44 N8 Ni1 O16 S16	tetrakis(bis(Ethylenedioxy)tetrathiafulvalenium) tetracyanonickelateacetonitrile solvate.	A.D.Dubrovskii,N.G.Spitsina,L.I.Buravov,G.V.Shilov,O.A.Dyachenko,E.B.Yagubskii,V.N.Laukhin,E.Canadell	J.MATER.CHEM.,2005,15,,1248	P-1	0D	4	A*M1)4	1,4M5-1	square	|Ni|	|2|	|4|	|C4|	0	-
SAPVEL	C60 H58 N4 Ni1 O26 S20	pentakis(bis(Ethylenedioxy)tetrathiafulvalenium) tetracyanonickelate ethyleneglycol solvate.	A.D.Dubrovskii,N.G.Spitsina,L.I.Buravov,G.V.Shilov,O.A.Dyachenko,E.B.Yagubskii,V.N.Laukhin,E.Canadell	J.MATER.CHEM.,2005,15,,1248	P-1	0D	4	A*M1)4	1,4M5-1	square	|Ni|	|2|	|4|	|C4|	0	-
SARSEK	C82 H166 Cr3 N24/Distance=2.30A(Set #1)	octakis(Tetraethylammonium) pentacyano-chromium(ii)(\m~2~-cyano-C,N)-octacyano-di-chromium(ii) acetonitrile solvate.	K.J.Nelson,I.D.Giles,W.W.Shum,A.M.Arif,J.S.Miller	Angew.Chem.,Int.Ed.,2005,44,,3129	P-1	0D	4.5	A)2*B2*M1)8|A*M1)5	1,5M6-1|1,2,5M11-1	square pyramid	|Cr|	|2|	|5|	|C5|C4N|	0
SARVEM	C30 H72 Fe2 N24 O18 Sr3/Distance=2.00A(Set #1)	Tri-strontium bis(hexacyano-iron(iii)) tris(hexamethylenetetramine)octadecahydrate.	H.-J.Meyer,J.Pickardt	Z.NATURFORSCH.,B:CHEM.SCI.,1989,44,,519	P42/nmc	0D	6	A*M1)6	1,6M7-1	octahedron	|Fe|	|3|	|6|	|C6|	0
SARVOW	C24 H46 Ba3 Fe2 N20 O11/Distance=2.10A(Set #1)	Tri-barium bis(hexacyano-iron(iii)) bis(hexamethylenetetramine) undecahydrate.	H.-J.Meyer,J.Pickardt	Z.NATURFORSCH.,B:CHEM.SCI.,1989,44,,519	P1121	0D	6	A*M1)6	1,6M7-1	octahedron	|Fe|	|3|	|6|	|C6|	0
SAZFAB	C46 H34 N20 Ni1	bis(1-Methyl-5-(3-(1-methyl-1H-tetrazolo(5,1-a)isoindol-5-yl)allylidene)-5H-tetrazolo(5,1-a)isoindol-1-ium) tetracyano-nickel(ii).	Z.V.Voitenko,T.V.Yegorova,I.V.Zatovsky,J.Jaud,J.G.Wolf	ACTA CRYSTALLOGR.,SECT.E:STRUCT.REP.ONLINE,2006,62,,m103	P21/n	0D	4	A*M1)4	1,4M5-1	square	|Ni|	|2|	|4|	|C4|	0	-
SEGFAM	C78 H64 Cr1 N6 O2 P3	tris(tetraphenylphosphonium) hexacyano-chromium(iii) dihydrate.	P.Albores,L.D.Slep,T.Weyhermuller,E.Rentschler,L.M.Baraldo	DALTON TRANS.,2006,,,948	P21/n	0D	6	A*M1)6	1,6M7-1	octahedron	|Cr|	|3|	|6|	|C6|	0	-
SEYRAP	C30 H70 Fe1 N9 O5	tris(Tetraethylammonium) hexacyano-ferrate(iii) pentahydrate.	L.Ouahab,S.Bouhebour,J.-P.Auffredic,D.Grandjean	J.SOLID STATE CHEM.,1989,82,,139	P21	0D	6	A*M1)6	1,6M7-1	octahedron	|Fe|	|3|	|6|	|C6|	0	-
SILNAC	C18 H12 Au1 N2 S2 Se2	2,7-bis(Methylseleno)-1,6-dithiapyrene dicyano-gold.	Kawamoto A.,Tanaka J.,Oda A.,Mizumura H.,Murata I.,Nakasuji K.	BULL.CHEM.SOC.JPN.,1990,63,,2137	P2/c	0D	2	A*M1)2	1,2M3-1	linear	|Au|	|1|	|2|	|C2|	0	-
SOCVEL	C44 H52 Au4 N28 O8/Distance=2.00A(Set #1)	6,12,18,24,30,36-Hexa-amino-4,10,16,22,28,34-hexamethylcalix(6)pyrimidiniumoctacyanotetra-aurate(i) dinitrate dihydrate.	R.E.Cramer,D.W.Smith,W.VanDoorne	INORG.CHEM.,1998,37,,5895	P-1	0D	2	A*M1)2	1,2M3-1	linear	|Au|	|1|	|2|	|C2|	0
SOCVOV	C48 H58 Au6 N30 O5/Distance=2.10A(Set #1)	6,12,18,24,30,36-Hexa-amino-4,10,16,22,28,34-hexamethylcalix(6)pyrimidiniumbis(hexacyanotriaurate(i)) pentahydrate.	R.E.Cramer,D.W.Smith,W.VanDoorne	INORG.CHEM.,1998,37,,5895	P-1	0D	2	A*M1)2	1,2M3-1	linear	|Au|	|1|	|2|	|C2|	0
SONVOH	C54 H60 Cr2 N24	tris(2,2'-benzene-1,4-diylbis(3,4,5,6-tetrahydropyrimidin-1-ium))bis(hexacyano-chromium).	P.Dechambenoit,S.Ferlay,N.Kyritsakas,M.W.Hosseini	J.AM.CHEM.SOC.,2008,130,,17106	P21/c	0D	6	A*M1)6	1,6M7-1	octahedron	|Cr|	|3|	|6|	|C6|	0	-
SONVUN	C54 H60 Cr2 N24 O6/Distance=2.20A(Set #1)	tris(2,2'-benzene-1,4-diylbis(5-hydroxy-3,4,5,6-tetrahydropyrimidin-1-ium))bis(hexacyano-chromium).	P.Dechambenoit,S.Ferlay,N.Kyritsakas,M.W.Hosseini	J.AM.CHEM.SOC.,2008,130,,17106	P21/n	0D	6	A*M1)6	1,6M7-1	octahedron	|Cr|	|3|	|6|	|C6|	0
SONWAU	C54 H60 Fe2 N24 O6/Distance=2.00A(Set #1)	tris(2,2'-benzene-1,4-diylbis(5-hydroxy-3,4,5,6-tetrahydropyrimidin-1-ium))bis(hexacyano-iron).	P.Dechambenoit,S.Ferlay,N.Kyritsakas,M.W.Hosseini	J.AM.CHEM.SOC.,2008,130,,17106	P21/n	0D	6	A*M1)6	1,6M7-1	octahedron	|Fe|	|3|	|6|	|C6|	0
SONWEY	C54 H60 Fe2 N24	tris(2,2'-benzene-1,4-diylbis(3,4,5,6-tetrahydropyrimidin-1-ium))bis(hexacyano-iron).	P.Dechambenoit,S.Ferlay,N.Kyritsakas,M.W.Hosseini	J.AM.CHEM.SOC.,2008,130,,17106	P-1	0D	6	A*M1)6	1,6M7-1	octahedron	|Fe|	|3|	|6|	|C6|	0	-
SONWIC	C54 H60 Co2 N24	tris(2,2'-benzene-1,4-diylbis(3,4,5,6-tetrahydropyrimidin-1-ium))bis(hexacyano-cobalt).	P.Dechambenoit,S.Ferlay,N.Kyritsakas,M.W.Hosseini	J.AM.CHEM.SOC.,2008,130,,17106	P-1	0D	6	A*M1)6	1,6M7-1	octahedron	|Co|	|3|	|6|	|C6|	0	-
SONWOI	C54 H60 Co2 N24 O6/Distance=2.00A(Set #1)	tris(2,2'-benzene-1,4-diylbis(5-hydroxy-3,4,5,6-tetrahydropyrimidin-1-ium))bis(hexacyano-cobalt).	P.Dechambenoit,S.Ferlay,N.Kyritsakas,M.W.Hosseini	J.AM.CHEM.SOC.,2008,130,,17106	P21/n	0D	6	A*M1)6	1,6M7-1	octahedron	|Co|	|3|	|6|	|C6|	0
SONWUO	C54 H76 Fe2 N24 O14	tris(2,2'-benzene-1,4-diylbis(5-hydroxy-3,4,5,6-tetrahydropyrimidin-1-ium))bis(hexacyano-iron) octahydrate.	P.Dechambenoit,S.Ferlay,N.Kyritsakas,M.W.Hosseini	J.AM.CHEM.SOC.,2008,130,,17106	P21/n	0D	6	A*M1)6	1,6M7-1	octahedron	|Fe|	|3|	|6|	|C6|	0	-
SONXAV	C54 H76 Co2 N24 O14	tris(2,2'-benzene-1,4-diylbis(5-hydroxy-3,4,5,6-tetrahydropyrimidin-1-ium))bis(hexacyano-cobalt) octahydrate.	P.Dechambenoit,S.Ferlay,N.Kyritsakas,M.W.Hosseini	J.AM.CHEM.SOC.,2008,130,,17106	P21/n	0D	6	A*M1)6	1,6M7-1	octahedron	|Co|	|3|	|6|	|C6|	0	-
SONXEZ	C54 H76 Cr2 N24 O14	tris(2,2'-benzene-1,4-diylbis(5-hydroxy-3,4,5,6-tetrahydropyrimidin-1-ium))bis(hexacyano-chromium) octahydrate.	P.Dechambenoit,S.Ferlay,N.Kyritsakas,M.W.Hosseini	J.AM.CHEM.SOC.,2008,130,,17106	P21/n	0D	6	A*M1)6	1,6M7-1	octahedron	|Cr|	|3|	|6|	|C6|	0	-
SOYXAG	C54 H74 Fe2 N24 O7/Distance=2.00A(Set #1)	tris(2,2'-benzene-1,4-diylbis(3,4,5,6-tetrahydropyrimidin-1-ium))bis(hexacyano-iron) heptahydrate.	P.Dechambenoit,S.Ferlay,N.Kyritsakas,M.W.Hosseini	J.AM.CHEM.SOC.,2008,130,,17106	P-1	0D	6	A*M1)6	1,6M7-1	octahedron	|Fe|	|3|	|6|	|C6|	0
SOYXEK	C54 H74 Co2 N24 O7/Distance=1.90A(Set #1)	tris(2,2'-benzene-1,4-diylbis(3,4,5,6-tetrahydropyrimidin-1-ium))bis(hexacyano-cobalt) heptahydrate.	P.Dechambenoit,S.Ferlay,N.Kyritsakas,M.W.Hosseini	J.AM.CHEM.SOC.,2008,130,,17106	P-1	0D	6	A*M1)6	1,6M7-1	octahedron	|Co|	|3|	|6|	|C6|	0
SOYXIO	C54 H74 Cr2 N24 O7/Distance=2.10A(Set #1)	tris(2,2'-benzene-1,4-diylbis(3,4,5,6-tetrahydropyrimidin-1-ium))bis(hexacyano-chromium) heptahydrate.	P.Dechambenoit,S.Ferlay,N.Kyritsakas,M.W.Hosseini	J.AM.CHEM.SOC.,2008,130,,17106	P21/n	0D	6	A*M1)6	1,6M7-1	octahedron	|Cr|	|3|	|6|	|C6|	0
SOZBIS10	C7 H12 Cd1 N2/Distance=2.20A(Set #1)	catena-(bis(\m~2~-Cyano)-cadmium 2,2-dimethylpropane clathrate).	T.Kitazawa,S.-I.Nishikiori,R.Kuroda,T.Iwamoto	J.CHEM.SOC.,DALTON TRANS.,1994,,,1029	Fd3m	3D	2	A*B2)2	dia Diamond; 4/6/c1; sqc6	tetrahedron	|Cd|	|2|	|4|	|N4|	1
SUFGOP	C79 H60 Cd2 N7 P3/Distance=2.30A(Set #1)	tris(Tetraphenylphosphonium) (\m~2~-cyano-C,N)-bis(tricyano-cadmium).	T.Kitazawa,M.Takeda	CHEM.COMMUN.,1993,,,309	R-3c	0D	3.5	A)2*B2*M1)6	1,2,4M9-2	tetrahedron	|Cd|	|2|	|4|	|C4|	0
SUHDAB	C26 H22 Au1 N4 O2 S12	bis(rac-4-(4-Methyl-2-oxazolinyl)-4',5'-(ethylenedithio)tetrathiafulvalene)dicyano-gold.	A.M.Madalan,C.Rethore,M.Fourmigue,E.Canadell,E.B.Lopes,M.Almeida,P.Auban-Senzier,N.Avarvari	Chem.-Eur.J.,2010,16,,528	P-1	0D	2	A*M1)2	1,2M3-1	linear	|Au|	|1|	|2|	|C2|	0	-
SUHDIJ	C26 H22 Au1 N4 O2 S12	bis((S)-4-(4-Methyl-2-oxazolinyl)-4',5'-(ethylenedithio)tetrathiafulvalene)dicyano-gold.	A.M.Madalan,C.Rethore,M.Fourmigue,E.Canadell,E.B.Lopes,M.Almeida,P.Auban-Senzier,N.Avarvari	Chem.-Eur.J.,2010,16,,528	P1	0D	2	A*M1)2	1,2M3-1	linear	|Au|	|1|	|2|	|C2|	0	-
SUKCEH	C70 H80 Fe1 N10 O12	tetrakis(1-Benzylbenzopyridinium) hexcyano-iron(ii) dodecahydrate.	Hua-Ming Huang,Xiu-Zhu Bian,Qiao-Yun Du	Jiegou Huaxue(Chin.J.Struct.Chem.),2009,28,,859	P-1	0D	6	A*M1)6	1,6M7-1	octahedron	|Fe|	|2|	|6|	|C6|	0	-
TAFZUV	C18 H36 Au1 N3	Tetra-n-butylammonium dicyano-gold(i).	R.J.Schubert,K.-J.Range	Z.NATURFORSCH.,B:CHEM.SCI.,1990,45,,1118	A2/n	0D	2	A*M1)2	1,2M3-1	linear	|Au|	|1|	|2|	|C2|	0	-
TANBOZ	C11 H11 Cu2 N3 S1/Distance=2.00A(Set #1);Distance=0.00A(Set #1);Distance=0.00A(Set #1);Distance=0.00A(Set #1)	catena(Dimethylphenylsulfonium tricyano-di-copper(i)).	J.Cernak,K.Gyoryova,S.Sabolova,M.Dunaj-Jurco	INORG.CHIM.ACTA,1991,185,,119	P21/n	2D	1.5	A)2*B2)3	hcb; Shubnikov hexagonal plane net/(6,3)	triangular	|Cu|	|1|	|3|	|C2N|CN2|	1
TAXGIK	C22 H16 Au1 N2 S16/Distance=2.00A(Set #1)	bis(2,5-bis(1,3-dithiolan-2-ylidene)[1,3]dithiolo[4,5-d][1,3]dithiol-1-ium)dicyano-gold.	J.Yamada,H.Akutsu	Crystals,2012,2,,812	P-1	0D	2	A*M1)2	1,2M3-1	linear	|Au|	|1|	|2|	|C2|	0
TAXGUW	C22 H16 Au1 N2 O2 S14/Distance=2.00A(Set #1)	bis(2-(1,3-Dithiolan-2-ylidene)-5-(1,3-oxathiolan-2-ylidene)[1,3]dithiolo[4,5-d][1,3]dithiol-1-ium) dicyano-gold.	J.Yamada,H.Akutsu	Crystals,2012,2,,812	P-1	0D	2	A*M1)2	1,2M3-1	linear	|Au|	|1|	|2|	|C2|	0
TAYXOH	C28 H14 Au2 F4 N4 O4 S4	1,2-bis(5,6-Dihydro(1,3)dithiolo(4,5-b)(1,4)dioxin-2-ylidene)-1,2-bis(2,6-difluorophenyl)ethane dication bis(dicyano-gold).	M.Osada,T.Kumagai,M.Sugimoto,J.Nishida,Y.Yamashita	Synth.Met.,2005,152,,429	P-1	0D	2	A*M1)2	1,2M3-1	linear	|Au|	|1|	|2|	|C2|	0	-
TEAMOC	C20 H38 Mo1 N10 O2	bis(Triethylammonium) dioxonium octacyano-molybdenum(iv).	J.G.Leipoldt,S.S.Basson,L.D.C.Bok	INORG.CHIM.ACTA,1980,38,,L99	C2/c	0D	8	A*M1)8	1,8M9-1	square antiprism	|Mo|	|4|	|8|	|C8|	0	-
TILVAL	C6 H10 Cd1 N2 O1/Distance=2.30A(Set #1)	catena-(Dicyano-cadmium(ii) hemikis(di-n-butylether) hemihydrate clathrate).	Kitazawa T.,Kikuyama T.,Takeda M.,Iwamoto T.	J.CHEM.SOC.,DALTON TRANS.,1995,,,3715	P63/mmc	3D	2	A*B2)2	lon; 4/6/h2	tetrahedron	|Cd|	|2|	|4|	|C4|	1
TILVEP	C6 H9 Cd1 N2 O0.5/Distance=2.20A(Set #1)	catena-(Dicyano-cadmium(ii) hemikis(di-isobutyl ether) clathrate).	Kitazawa T.,Kikuyama T.,Takeda M.,Iwamoto T.	J.CHEM.SOC.,DALTON TRANS.,1995,,,3715	Fd3m	3D	2	A*B2)2	dia Diamond; 4/6/c1; sqc6	tetrahedron	|Cd|	|2|	|4|	|C4|	1
TILVIT	C7 H11 Cd1 N2 O0.5/Distance=2.20A(Set #1)	catena-(bis(\m~2~-Cyano)-cadmium(ii) di-isopentyl ether clathrate).	Kitazawa T.,Kikuyama T.,Takeda M.,Iwamoto T.	J.CHEM.SOC.,DALTON TRANS.,1995,,,3715	Fd3m	3D	2	A*B2)2	dia Diamond; 4/6/c1; sqc6	tetrahedron	|Cd|	|2|	|4|	|C4|	1
TILVOZ	C5 H7 Cd1 Cl1 N2	catena-(Dicyano-cadmium(ii) isopropylchloride clathrate).	T.Kitazawa,T.Kikuyama,M.Takeda,T.Iwamoto	,1995,,,3715	Fd3m	3D	2	A*B2)2	dia Diamond; 4/6/c1; sqc6	tetrahedron	|Cd|	|2|	|4|	|C4|	1
TILVUF	C4 H3 Cd1 Cl3 N2/Distance=2.30A(Set #1)	catena-(Dicyano-cadmium(ii) 1,1,2-trichloroethane clathrate).	T.Kitazawa,T.Kikuyama,M.Takeda,T.Iwamoto	J.CHEM.SOC.,DALTON TRANS.,1995,,,3715	P41212	3D	2	A*B2)2	dia Diamond; 4/6/c1; sqc6	tetrahedron	|Cd|	|2|	|4|	|C4|	1
TILWAM	C5 H7 Br1 Cd1 N2/Distance=2.30A(Set #1)	catena-(Dicyano-cadmium(ii) isopropyl bromide clathrate).	T.Kitazawa,T.Kikuyama,M.Takeda,T.Iwamoto	J.CHEM.SOC.,DALTON TRANS.,1995,,,3715	P41212	3D	2	A*B2)2	dia Diamond; 4/6/c1; sqc6	tetrahedron	|Cd|	|2|	|4|	|C4|	1
TILWEQ	C6 H7 Cd1 N3/Distance=2.90A(Set #2)	catena(Dicyano-cadmium(ii) isopropyl nitrile clathrate).	T.Kitazawa,T.Kikuyama,M.Takeda,T.Iwamoto	J.CHEM.SOC.,DALTON TRANS.,1995,,,3715	P41212	3D	2	A*B2)2	dia Diamond; 4/6/c1; sqc6	tetrahedron	|Cd|	|2|	|4|	|C4|	1
TUZZOD	C34 H28 Au1 N2 O4 S20	bis(2-[4,5-bis(ethylthio)-1,3-dithiol-2-ylidene]-5-(4,5-ethylenedithio-1,3-dithiol-2-ylidene)-1,3,4,6-tetrathiapentalene) dicyanoaurate.	S.Kimura,H.Nii,H.Kurai,T.Takeuchi,M.Katsuhara,T.Mori	BULL.CHEM.SOC.JPN.,2003,76,,89	P-1	0D	2	A*M1)2	1,2M3-1	linear	|Au|	|1|	|2|	|C2|	0	-
UCACAC	C26 H16 Au1 Br2 N2 S8/Distance=2.00A(Set #1)	1,2-bis(2-Bromophenyl)-1,2-bis(4,5-ethylenedithio-1,3-dithiol-2-ylidene)ethanedicyano-gold.	Y.Yamashita,M.Tomura,S.Tanaka,K.Imaeda	Synth.Met.,1999,102,,1730	P21/c	0D	2	A*M1)2	1,2M3-1	linear	|Au|	|1|	|2|	|C2|	0
UDAXUS	C30 H62 Mo1 N6 O4/Distance=2.10A(Set #1)	tris(Tetraethylammonium) tricarbonyl-tricyano-molybdenum monohydrate.	S.M.Contakes,T.B.Rauchfuss	Angew.Chem.,Int.Ed.,2000,39,,1984	P21/c	0D	6	A*M1)6	1,6M7-1	octahedron	|Mo|	|4|	|6|	|C6|	0
UFENEZ	C4 H5 Cu2 N3 O1/Distance=2.40A(Set #1);Distance=0.00A(Set #1);Distance=0.00A(Set #1);Distance=0.00A(Set #1)	catena-(methyloxonium bis(\m~3~-cyano)-(\m~2~-cyano)-di-copper).	Hong Deng,Yongcai Qiu,C.Daiguebonne,N.Kerbellec,O.Guillou,M.Zeller,S.R.Batten	INORG.CHEM.,2008,47,,5866	Pbcn	3D	1.5	A)2*B3)2*B2	fsc-3,4-Pbcn-1	tetrahedron	|Cu|	|1|	|4|	|C3N|	1
UGUVEX	C11 H20 Cu2 N4/Distance=2.00A(Set #1)	catena-(Tetraethylammonium tris(\m~2~-cyano)-di-copper(i,ii)).	E.Colacio,R.Kivekas,F.Lloret,M.Sunberg,J.Suarez-Varela,M.Bardaji,A.Laguna	INORG.CHEM.,2002,41,,5141	Ibam	2D	1.5	A)2*B2)3	hcb; Shubnikov hexagonal plane net/(6,3)	triangular	|Cu|	|1,5|	|3|	|C3|	1
UHAYUY	C20 H16 Au2 N8	2,2'-Ethane-1,2-diylbis(1H-benzimidazol-3-ium) bis(dicyanoaurate(i)).	S.Verdan,X.Melich,G.Bernardinelli,A.F.Williams	CRYSTENGCOMM,2009,11,,1416	P21/n	0D	2	A*M1)2	1,2M3-1	linear	|Au|	|1|	|2|	|C2|	0	-
UJILAA	C135 H260 Cu10 N20/Distance=2.30A(Set #3)	catena-(pentakis(Tetra-n-hexylammonium)pentadecakis(\m~2~-cyano-C,N)-deca-copper).	T.Pretsch,I.Brudgam,H.Hartl	Z.ANORG.ALLG.CHEM.,2003,629,,942	R3	3D	1.5	A)2*B2)3	3,3,3,3,3T1	triangular	|Cu|	|1|	|3|	|C2N|CN2|N3|	1
UMIYIY	C6 H10 Au1 N3/Distance=2.00A(Set #1)	Pyrrolidinium dicyano-gold(i).	M.Stender,M.M.Olmstead,A.L.Balch,D.Rios,S.Attar	DALTON TRANS.,2003,,,4282	C2/c	0D	2	A*M1)2	1,2M3-1	linear	|Au|	|1|	|2|	|C2|	0
UMIYOE	C14 H15 Au1 N4 O1	Diphenylhydrazinium dicyano-gold(i) monohydrate.	Stender M.,Olmstead M.M.,Balch A.L.,Rios D.,Attar S.	DALTON TRANS.,2003,,,4282	Pbca	0D	2	A*M1)2	1,2M3-1	linear	|Au|	|1|	|2|	|C2|	0	-
UMIYUK	(C5H12N)Au(CN)2	Piperidinium dicyano-gold(i).	Stender M.,Olmstead M.M.,Balch A.L.,Rios D.,Attar S.	DALTON TRANS.,2003,,,4282	Pbca	0D	2	A*M1)2	1,2M3-1	linear	|Au|	|1|	|2|	|C2|	0	-
UMIZAR	C14 H30 Au1 N3 O1	Tetra-n-propylammonium dicyano-gold(i) monohydrate.	M.Stender,M.M.Olmstead,A.L.Balch,D.Rios,S.Attar	DALTON TRANS.,2003,,,4282	P2/n	0D	2	A*M1)2	1,2M3-1	linear	|Au|	|1|	|2|	|C2|	0	-
UVEGAE	C58 H40 Au1 N2 O1 S32	tetrakis(2-(4,5-Cyclopenteno-1,3-dithiol-2-ylidene)-5-(1,3-dithiol-2-ylidene)-1,3,4,6-tetrathiapentalene) dicyanoaurate tetrahydrofuran solvate.	M.Nishiwaki,K.Nakamura,T.Shirahata,Y.Misaki	Chem.Lett.,2011,40,,452	C2/c	0D	2	A*M1)2	1,2M3-1	linear	|Au|	|1|	|2|	|C2|	0	-
VAJLOI	C96 H81 Fe2 N26 O12.5 Sr3/Distance=2.00A(Set #1)	catena-(hexakis((\m~2~-cyano)-aqua-(1,10-phenanthroline))-di-iron(iii)-tri-strontium(ii) 1,10-phenanthroline solvate hydrate).	A.Datta,G.M.Golzar Hossain,N.K.Karan,K.M.Abdul Malik,S.Mitra	Inorg.Chem.Commun.,2003,6,,658	P-1	0D	6	A*M1)6	1,6M7-1	octahedron	|Fe|	|3|	|6|	|C6|	0
VATZEV10	C42 H26 N10 Pt2 S20/Distance=2.10A(Set #1)	pentakis(Tetrathiafulvalene) bis(tetracyano-platinum) acetonitrile solvate.	L.Ouahab,M.Fettouhi,J.F.Halet,V.M.Yartsev,C.Garrigou-Lagrange,P.Delhaes,C.Sourisseau	New J.Chem.,1993,17,,399	P-1	0D	4	A*M1)4	1,4M5-1	square	|Pt|	|2|	|4|	|C4|	0
VATZIZ	C34 H36 N4 Pt1 Se12	tris(Tetramethyltetraselenafulvalenium) tetracyano-platinum(ii).	L.Ouahab,J.Padiou,D.Grandjean,C.Carrigou-Lagrange,P.Delhaes,M.Bencharif	CHEM.COMMUN.,1989,,,1038	P-1	0D	4	A*M1)4	1,4M5-1	square	|Pt|	|2|	|4|	|C4|	0	-
VATZOF	C44 H32 N4 Pt1 S32	tetrakis(bis(Ethylenedithio)tetrathiafulvalenium) tetracyano-platinum(ii).	L.Ouahab,J.Padiou,D.Grandjean,C.Carrigou-Lagrange,P.Delhaes,M.Bencharif	CHEM.COMMUN.,1989,,,1038	P-1	0D	4	A*M1)4	1,4M5-1	square	|Pt|	|2|	|4|	|C4|	0	-
VATZOF01	C44 H32 N4 Pt1 S32	tetrakis(bis(4,5-Ethylenedithiolo)tetrathiafulvalenium) tetracyano-platinum.	S.Gartner,I.Heinen,H.J.Keller,R.Niebl,B.Nuber,D.Schweitzer	Z.NATURFORSCH.,B:CHEM.SCI.,1990,45,,763	P-1	0D	4	A*M1)4	1,4M5-1	square	|Pt|	|2|	|4|	|C4|	0	-
VATZOF02	C44 H32 N4 Pt1 S32	tetrakis(bis(4,5-Ethylenedithiolo)tetrathiafulvalenium) tetracyano-platinum.	S.Gartner,I.Heinen,H.J.Keller,R.Niebl,B.Nuber,D.Schweitzer	Z.NATURFORSCH.,B:CHEM.SCI.,1990,45,,763	C2/c	0D	4	A*M1)4	1,4M5-1	square	|Pt|	|2|	|4|	|C4|	0	-
VATZOF03	C44 H32 N4 Pt1 S32	tetrakis(bis(Ethylenedithio)tetrathiafulvalene) tetracyano-platinum.	R.M.Lobkovskaya,N.D.Kushch,R.P.Shibaeva,E.B.Yagubskii,M.A.Simonov	Kristallografiya(Russ.)(Crystallogr.Rep.),1989,34,,1158	C-1	0D	4	A*M1)4	1,4M5-1	square	|Pt|	|2|	|4|	|C4|	0	-
VATZOF05	C44 H32 N4 Pt1 S32	tetrakis(bis(Ethylenedithio)tetrathiafulvalene) tetracyano-platinum(ii).	M.Fettouhi,L.Ouahab,D.Grandjean,L.Ducasse,J.Amiell,R.Canet,P.Delhaes	Chem.Mater.,1995,7,,461	C2/c	0D	4	A*M1)4	1,4M5-1	square	|Pt|	|2|	|4|	|C4|	0	-
VATZOF06	C44 H32 N4 Pt1 S32/Distance=2.00A(Set #2)	tetrakis(bis(Ethylenedithio)tetrathiafulvalene) tetracyano-platinum(ii).	M.Fettouhi,L.Ouahab,D.Grandjean,L.Ducasse,J.Amiell,R.Canet,P.Delhaes	Chem.Mater.,1995,7,,461	P21/c	0D	4	A*M1)4	1,4M5-1	square	|Pt|	|2|	|4|	|C4|	0
VAZDIJ	C30.75 H57.75 Fe2 N21.75 O3/Distance=2.00A(Set #1)	tris(6,13-Dimethyl-1,8-diammonio-4,11-diazocyclotetradecane-6,13-diammonium)tetrakis(hexacyano-iron(iii)) trihydrate hydrogen cyanide solvate.	P.V.Bernhardt,G.A.Lawrance,B.W.Skelton,A.H.White	AUST.J.CHEM.,1989,42,,1035	P21/c	0D	6	A*M1)6	1,6M7-1	octahedron	|Fe|	|3|	|6|	|C6|	0
VEFJIZ10	C22 H18 Ag1 N2 O1 S16	bis(3,4;3',4'-bis(Ethylenedithio)-2,2',5,5'-tetrathiafulvalenium)dicyano-silver(i) monohydrate.	M.Kurmoo,K.L.Pritchard,D.R.Talham,P.Day,A.M.Stringer,J.A.K.Howard	ACTA CRYSTALLOGR.,SECT.B:STRUCT.SCI.,1990,46,,348	P21	1D	2	A*B2*M1	2C1	triangular	|Ag|	|1|	|3|	|C2N|	0	-
VEKVEN	C28 H52 N4 O14 Pt1 Tl2/Distance=2.10A(Set #1)	Tetracyano-bis(18-crown-6)-platinum-di-thallium dihydrate.	Feng-Hui Liu,Wan-Zhi Chen,Da-Qi Wang	Jiegou Huaxue(Chin.J.Struct.Chem.),2006,25,,677	P21/n	0D	4	A*M1)4	1,4M5-1	square	|Pt|	|2|	|4|	|C4|	0
VIKSIS	C27 H26 Au1 N4 O6 Se8/Distance=3.00A(Set #2)	\k~L~-bis(4,5-Dimethyl-4',5'-(ethylenedioxy)-1,1',3,3'-tetraselenafulvalene)tetracyano-gold 1,3-dioxolane solvate.	T.Shirahata,M.Kibune,H.Yoshino,T.Imakubo	Chem.-Eur.J.,2007,13,,7619	Pnma	0D	4	A*M1)4	1,4M5-1	square	|Au|	|3|	|4|	|C4|	0
VIKSIS01	C27 H26 Au1 N4 O6 Se8/Distance=2.00A(Set #1)	\k~L~-bis(4,5-Dimethyl-4',5'-(ethylenedioxy)-1,1',3,3'-tetraselenafulvalene)tetracyano-gold 1,3-dioxolane solvate.	T.Shirahata,M.Kibune,H.Yoshino,T.Imakubo	Chem.-Eur.J.,2007,13,,7619	Pnma	0D	4	A*M1)4	1,4M5-1	square	|Au|	|3|	|4|	|C4|	0
VIKSIS02	C27 H26 Au1 N4 O6 Se8/Distance=2.10A(Set #1)	\k'-bis(4,5-Dimethyl-4',5'-(ethylenedioxy)-1,1',3,3'-tetraselenafulvalene)tetracyano-gold 1,3-dioxolane solvate.	T.Shirahata,M.Kibune,H.Yoshino,T.Imakubo	Chem.-Eur.J.,2007,13,,7619	Cc	0D	4	A*M1)4	1,4M5-1	square	|Au|	|3|	|4|	|C4|	0
VIKSOY	C29 H30 Au1 N4 O5 Se8/Distance=2.00A(Set #1)	\k~L~-bis(4,5-Dimethyl-4',5'-(ethylenedioxy)-1,1',3,3'-tetraselenafulvalene)tetracyano-gold tetrahydropyran solvate.	T.Shirahata,M.Kibune,H.Yoshino,T.Imakubo	Chem.-Eur.J.,2007,13,,7619	Pnma	0D	4	A*M1)4	1,4M5-1	square	|Au|	|3|	|4|	|C4|	0
VIKSUE01	C28 H28 Au1 N4 O6 Se8	\k~L~-bis(4,5-Dimethyl-4',5'-(ethylenedioxy)-1,1',3,3'-tetraselenafulvalene)tetracyano-gold 1,3-dioxane solvate.	T.Shirahata,M.Kibune,H.Yoshino,T.Imakubo	Chem.-Eur.J.,2007,13,,7619	Pnma	0D	4	A*M1)4	1,4M5-1	square	|Au|	|3|	|4|	|C4|	0	-
VIKTAL	C28 H28 Au1 N4 O6 Se8/Distance=3.00A(Set #2)	\k'-bis(4,5-Dimethyl-4',5'-(ethylenedioxy)-1,1',3,3'-tetraselenafulvalene)tetracyano-gold 1,4-dioxane solvate.	T.Shirahata,M.Kibune,H.Yoshino,T.Imakubo	Chem.-Eur.J.,2007,13,,7619	Cc	0D	4	A*M1)4	1,4M5-1	square	|Au|	|3|	|4|	|C4|	0
VIKTAL01	C28 H28 Au1 N4 O6 Se8/Distance=2.90A(Set #2)	\k'-bis(4,5-Dimethyl-4',5'-(ethylenedioxy)-1,1',3,3'-tetraselenafulvalene)tetracyano-gold 1,4-dioxane solvate.	T.Shirahata,M.Kibune,H.Yoshino,T.Imakubo	Chem.-Eur.J.,2007,13,,7619	Cc	0D	4	A*M1)4	1,4M5-1	square	|Au|	|3|	|4|	|C4|	0
VIXPUN	C14 H24 Hg1 N2 Se4	1,5,9,13-Tetraselenacyclohexadecane dicyano-mercury(ii).	Bachelor R.J.,Einstein F.W.B.,Gay I.D.,Jian-Hua GU,Pinto B.M.	J.ORGANOMET.CHEM.,1991,411,,147	P21/c	0D	2	A*M1)2	1,2M3-1	linear	|Hg|	|2|	|2|	|C2|	0	-
VOJVUL	(N(CH3)4)2K(Mn(CN)6)	catena-(bis(Tetramethylammonium) hexakis(\m~2~-cyano)-manganese-potassium).	Ziegler B.,Witzel M.,Babel D.	Z.ANORG.ALLG.CHEM.,1991,600,,239	I4/m	0D	6	A*M1)6	1,6M7-1	octahedron	|Mn|	|3|	|6|	|C6|	0	-
VOJWAS	(N(CH3)4)2Rb(Co(CN)6)	catena-(bis(Tetramethylammonium) hexakis(\m~2~-cyano)-cobalt-rubidium).	Ziegler B.,Witzel M.,Babel D.	Z.ANORG.ALLG.CHEM.,1991,600,,239	I4/m	0D	6	A*M1)6	1,6M7-1	octahedron	|Co|	|3|	|6|	|C6|	0	-
VUJROH	C36 H28 N4 O2 Pt1 S24	tetrakis(5,6-Dihydro-2-(1,3-dithiol-2-ylidene)(1,3)dithiolo(4,5-b)(1,4)dithiine) tetracyano-platinate(ii) dihydrate.	M.Fettouhi,L.Ouahab,D.Grandjean,G.Mousdis,P.Delhaes	ACTA CRYSTALLOGR.,SECT.C:CRYST.STRUCT.COMMUN.,1992,48,,2141	C2/m	0D	4	A*M1)4	1,4M5-1	square	|Pt|	|2|	|4|	|C4|	0	-
VUJRUN	C36 H28 N4 O2 Pd1 S24	tetrakis(5,6-Dihydro-2-(1,3-dithiol-2-ylidene)(1,3)dithiolo(4,5-b)(1,4)dithiine) tetracyano-palladate(ii) dihydrate.	M.Fettouhi,L.Ouahab,D.Grandjean,G.Mousdis,P.Delhaes	ACTA CRYSTALLOGR.,SECT.C:CRYST.STRUCT.COMMUN.,1992,48,,2141	C2/m	0D	4	A*M1)4	1,4M5-1	square	|Pd|	|2|	|4|	|C4|	0	-
VUZDEZ	C29 H22 As1 Au1 Cl2 N4	Tetraphenylarsonium tetracyano-gold(iii) dichloromethane solvate.	P.G.Jones,C.Thone	ACTA CRYSTALLOGR.,SECT.C:CRYST.STRUCT.COMMUN.,1989,45,,11	Pbcm	0D	4	A*M1)4	1,4M5-1	square	|Au|	|3|	|4|	|C4|	0	-
WAHNAV	C12 H16 Au2 N8	1,2-bis(3H-Imidazolinium-2-yl)ethane bis(dicyano-gold(i)).	Paraschiv C.,Ferlay S.,Hosseini M.W.,Bulach V.,Planeix J.-M.	CHEM.COMMUN.,2004,,,2270	C2/c	0D	2	A*M1)2	1,2M3-1	linear	|Au|	|1|	|2|	|C2|	0	-
WAHNEZ	C18 H20 Au2 N8	1,4-bis(3,4,5,6-Tetrahydro-1H-pyrimidinium-2-yl)benzene bis(dicyano-gold(i)).	C.Paraschiv,S.Ferlay,M.W.Hosseini,V.Bulach,J.-M.Planeix	CHEM.COMMUN.,2004,,,2270	P-1	0D	2	A*M1)2	1,2M3-1	linear	|Au|	|1|	|2|	|C2|	0	-
WECXOS	C20 H42 Ag2 N8 O2	meso-5,5,7,12,12,14-Hexamethyl-4,11-diaza-1,8-diazoniacyclotetradecanebis(dicyanoargentate) dihydrate.	Jian-Gang DING	Z.KRISTALLOGR.-NEW CRYST.STRUCT.,2005,220,,571	Pn	0D	2	A*M1)2	1,2M3-1	linear	|Ag|	|1|	|2|	|C2|	0	-
WEGGAQ	C27 H20 Cu2 N3 P1/Distance=2.00A(Set #1)	catena-(Tetraphenylphosphonium tris(\m~2~-cyano)-di-copper(i)).	Yingjun Zhao,Maochun Hong,Weiping Su,Rong Cao,Zhongyuan Zhou,A.S.C.Chan	J.CHEM.SOC.,DALTON TRANS.,2000,,,1685	Pnma	2D	1.5	A)2*B2)3	hcb; Shubnikov hexagonal plane net/(6,3)	triangular	|Cu|	|1|	|3|	|C2N|	1
WEJZOA	C30 H20 Au1 N2 O4 S20	bis(2-(4',5'-bis(Methylthio)-1',3'-dithiol-2'-ylidene)-5-(4'',5''-ethylenedioxy-1'',3''-dithiol-2''-ylidene)-1,3,4,6-tetrathiapentalene) dicyano-gold.	T.Mori,H.Inokuchi,Y.Misaki,H.Nishikawa,T.Yamabe,H.Mori,S.Tanaka	Chem.Lett.,1993,,,2085	P-1	0D	2	A*M1)2	1,2M3-1	linear	|Au|	|1|	|2|	|C2|	0	-
WEPWET	C16 H8 Au1 N2 S8 Se4	bis(Methylenediselenotetrathiafulvalene) dicyano-gold.	H.Mori,I.Hirabayashi,S.Tanaka,T.Mori,Y.Muruyama,H.Inokuchi	Solid State Commun.,1993,88,,411	Pn2n	0D	2	A*M1)2	1,2M3-1	linear	|Au|	|1|	|2|	|C2|	0	-
WILWOD	C8 H12 Fe1 N8 Na1/Distance=2.00A(Set #1)	catena-(bis(Methylammonium) hexakis(\m~2~-cyano)-iron-sodium clathrate).	S.Peschel,D.Babel	Z.NATURFORSCH.,B:CHEM.SCI.,1994,49,,1373	Fm3m	0D	6	A*M1)6	1,6M7-1	octahedron	|Fe|	|3|	|6|	|C6|	0
WIYTON	C14 H26 Co1 N8 Na1 O1/Distance=2.00A(Set #1)	catena-(bis(Tetramethylammonium)tris(\m~2~-cyano)-aqua-tricyano-cobalt-sodium).	M.Schwarten,M.Witzel,D.Babel	Z.NATURFORSCH.,B:CHEM.SCI.,2000,55,,487	Pnma	0D	6	A*M1)6	1,6M7-1	octahedron	|Co|	|3|	|6|	|C6|	0
WOPYOP	C23 H16 Ag2 N3 S8 Se8/Distance=0.00A(Set #1);Distance=0.00A(Set #1);Distance=2.40A(Set #1);Distance=3.60A(Set #1)	catena-(\k-bis((Ethylenedithio)-(ethylenediseleno)tetrathiafulvalene radical)tris(\m~2~-cyano)-di-silver).	Golhen S.,Ouahab L.,Lebeuze A.,Bouayed M.,Delhaes P.,Kashimura Y.,Kato R.,Binet L.,Fabre J.-M.	J.MATER.CHEM.,1999,9,,387	P21/c	2D	1.5	A)2*B2)3	hcb; Shubnikov hexagonal plane net/(6,3)	triangular	|Ag|	|1|	|3|	|C2N|	1
WOPYUV	C22 H16 Ag1 N2 S8 Se8	\a-bis(bis(Ethylenedithio)tetraselenafulvalene radical) dicyano-silver.	Golhen S.,Ouahab L.,Lebeuze A.,Bouayed M.,Delhaes P.,Kashimura Y.,Kato R.,Binet L.,Fabre J.-M.	J.MATER.CHEM.,1999,9,,387	P21212	0D	2	A*M1)2	1,2M3-1	linear	|Ag|	|1|	|2|	|C2|	0	-
WOPYUV01	C22 H16 Ag1 N2 S8 Se8	bis(bis(Ethylenedithio)tetraselenafulvalene) dicyano-silver.	Mori H.,Sakurai N.,Tanaka S.,Moriyama H.,Mori T.,Kobayashi H.,Kobayashi A.	Chem.Mater.,2000,12,,2984	C2	0D	2	A*M1)2	1,2M3-1	linear	|Ag|	|1|	|2|	|C2|	0	-
WUGRIZ	C54 H72 Cr2 N24 O6	tris(1,4-bis(1-Azonia-3-azacyclohexen-2-yl)benzene)bis(hexacyano-chromium(iii)) hexahydrate.	S.Ferlay,V.Bulach,O.Felix,M.W.Hosseini,J.-M.Planeix,N.Kyritsakas	CRYSTENGCOMM,2002,4,,447	P21/n	0D	6	A*M1)6	1,6M7-1	octahedron	|Cr|	|3|	|6|	|C6|	0	-
WUGROF	C34 H56 Fe1 N14 O8	bis(1,4-bis(1-Azonia-3-azacyclohexen-2-yl)benzene) hexacyano-iron(ii)octahydrate.	S.Ferlay,V.Bulach,O.Felix,M.W.Hosseini,J.-M.Planeix,N.Kyritsakas	CRYSTENGCOMM,2002,4,,447	P-1	0D	6	A*M1)6	1,6M7-1	octahedron	|Fe|	|2|	|6|	|C6|	0	-
WUGRUL	C18 H20 N8 Pd1	1,4-bis(1-Azonia-3-azacyclohexen-2-yl)benzene tetracyano-palladium(ii).	S.Ferlay,V.Bulach,O.Felix,M.W.Hosseini,J.-M.Planeix,N.Kyritsakas	CRYSTENGCOMM,2002,4,,447	P-1	0D	4	A*M1)4	1,4M5-1	square	|Pd|	|2|	|4|	|C4|	0	-
WUGSAS	C18 H20 N8 Pt1	1,4-bis(1-Azonia-3-azacyclohexen-2-yl)benzene tetracyano-platinum(ii).	S.Ferlay,V.Bulach,O.Felix,M.W.Hosseini,J.-M.Planeix,N.Kyritsakas	CRYSTENGCOMM,2002,4,,447	P-1	0D	4	A*M1)4	1,4M5-1	square	|Pt|	|2|	|4|	|C4|	0	-
WUGSEW01	C34 H56 N14 O8 Ru1	bis(1,4-bis(1-Azonia-3-azacyclohexen-2-yl)benzene) hexacyano-ruthenium(ii)octahydrate.	P.Dechambenoit,S.Ferlay,M.W.Hosseini	CRYST.GROWTH DES.,2005,5,,2310	P-1	0D	6	A*M1)6	1,6M7-1	octahedron	|Ru|	|2|	|6|	|C6|	0	-
WUGSIA	C18 H20 N8 Ni1	1,4-bis(1-Azonia-3-azacyclohexen-2-yl)benzene tetracyano-nickel(ii).	S.Ferlay,V.Bulach,O.Felix,M.W.Hosseini,J.-M.Planeix,N.Kyritsakas	CRYSTENGCOMM,2002,4,,447	P-1	0D	4	A*M1)4	1,4M5-1	square	|Ni|	|2|	|4|	|C4|	0	-
WUWLIJ	C55 H108 N10 Re1/Distance=2.20A(Set #1)	tris(Tetrabutylammonium) heptacyanido-rhenium.	M.V.Bennett,J.R.Long	J.AM.CHEM.SOC.,2003,125,,2394	P21/c	0D	7	A*M1)7	1,7M8-1	pentagonal bipyramid	|Re|	|4|	|7|	|C7|	0
WUWLUV	C12 H6 K3 N10 Re1/Distance=2.20A(Set #1)	Tripotassium octacyanido-rhenium acetonitrile solvate.	M.V.Bennett,J.R.Long	J.AM.CHEM.SOC.,2003,125,,2394	Pnma	0D	8	A*M1)8	1,8M9-1	square antiprism	|Re|	|5|	|8|	|C8|	0
XACNEV	C34 H56 N10 Ni1 O8/Distance=1.90A(Set #1)	bis(4-(2-Hydroxyphenyl)-1,5-diaza-9-azoniacyclododecan-2-one)tetracyano-nickel(ii) tetrahydrate.	Jian-Rong Li,Ya-Bo Xie,Li-Zhen Cai,Guo-Cong Guo,Xian-He Bu,Jin-Shun Huang	Jiegou Huaxue(Chin.J.Struct.Chem.),2004,23,,361	P21/n	0D	4	A*M1)4	1,4M5-1	square	|Ni|	|2|	|4|	|C4|	0
XAGLIC	C54 H40 Ca2 Cl1 Fe1 N14 O8/Distance=2.00A(Set #1)	bis(\m~2~-cyanido)-triaqua-tetracyanido-(perchlorato)-tetrakis(1,10-phenanthroline)-di-calcium-iron monohydrate.	A.Datta,S.Pillet,Nien-Tsu Chuang,Hon Man Lee,Jui-Hsien Huang	Z.NATURFORSCH.,B:CHEM.SCI.,2010,65,,1106	P-1	0D	6	A*M1)6	1,6M7-1	octahedron	|Fe|	|3|	|6|	|C6|	0
XAGLOI	C56 H45 Ca2 Fe1 N14 O7/Distance=2.00A(Set #1)	bis(\m~2~-cyanido)-triaqua-tetracyanido-(acetato)-tetrakis(1,10-phenanthroline)-di-calcium-iron dihydrate.	A.Datta,S.Pillet,Nien-Tsu Chuang,Hon Man Lee,Jui-Hsien Huang	Z.NATURFORSCH.,B:CHEM.SCI.,2010,65,,1106	P-1	0D	6	A*M1)6	1,6M7-1	octahedron	|Fe|	|3|	|6|	|C6|	0
XAMBOC	C22 H39 Cu3 N6	catena-(Tetra(n-butyl)ammonium tetrakis(\m~2~-cyano)-tri-copper(i))acetonitrile solvate.	Bowmaker G.A.,Hartl H.,Urban V.	INORG.CHEM.,2000,39,,4548	C2	2D	1.33	A)3*B2)4	hcb; Shubnikov hexagonal plane net/(6,3)	triangular & linear	|Cu|	|1|	|3|2|	|CN2|CN|C2N|	1	-
XIGXAM	C59 H122 Mo2 N18 O4/Distance=2.30A(Set #1)	pentakis(Tetraethylammonium) (\m~2~-cyano)-decacyano-di-molybdenum(iii)dimethylformamide methanol solvate.	L.G.Beauvais,J.R.Long	J.AM.CHEM.SOC.,2002,124,,2110	P-1	0D	5.5	A)2*B2*M1)10	1,2,6M13-2	octahedron	|Mo|	|3|	|6|	|C5N|	0
XILBEA	C42 H52 Fe1 N10 O8	bis(1,1'-(1,4-Phenylenebis(methylene))dipyridinium) hexacyanidoferrate(ii)octahydrate.	Ming-Sheng TANG,Yang-Jie WU,Xiu-Cun LIU,Chen-Xia DU,Yun-Yin NIU	ACTA CRYSTALLOGR.,SECT.E:STRUCT.REP.ONLINE,2007,63,,m2517	P-1	0D	6	A*M1)6	1,6M7-1	octahedron	|Fe|	|2|	|6|	|C6|	0	-
XISCOS	C14 H24 N6 O1 Pt1	4,4'-Bipiperidinium tetracyano-platinum(ii) monohydrate.	B.A.Maynard,R.E.Sykora	ACTA CRYSTALLOGR.,SECT.E:STRUCT.REP.ONLINE,2008,64,,m138	P212121	0D	4	A*M1)4	1,4M5-1	square	|Pt|	|2|	|4|	|C4|	0	-
XIXROL	C9.6 H9.2 Cu1 N9 O1.8 W1/Distance=2.20A(Set #2)	catena-(Tetraethylenepenta-ammoniumpentakis(\m~2~-cyano-C,N)-tricyano-copper(ii)-tungsten(v) hydrate).	Podgajny R.,Korzeniak T.,Balanda M.,Wasiutynski T.,Errington W.,Kemp T.J.,Alcock N.W.,Sieklucka B.	CHEM.COMMUN.,2002,,,1138	Cmc21	2D	4	A)2*B2)5*M1)3	SP 2-periodic net (4,4)Ia; SnS	square antiprism & square pyramid	|Cu|W|	|2|5|	|5|8|	|N5|C8|	1
XIZCOY	C20 H8 Au1 I4 N4 S8 Se4	bis(Diiodo(ethylenedithio)diselenadithiafulvalene) tetracyano-aurate.	T.Imakubo,N.Tajima,M.Tamura,R.Kato,Y.Nishio,K.Kajita	J.MATER.CHEM.,2002,12,,159	Pnnm	0D	4	A*M1)4	1,4M5-1	square	|Au|	|3|	|4|	|C4|	0	-
XOJPES	C4 H6 Cu2 N6/Distance=2.00A(Set #1);Distance=0.00A(Set #1);Distance=0.00A(Set #1);Distance=0.00A(Set #1)	catena-(Guanidinium tris(\m~2~-cyano)-di-copper(i)).	Shi-Hong Lin,Xiao-Ping Zhou,Dan Li,S.W.Ng	CRYST.GROWTH DES.,2008,8,,3879	C2/c	2D	1.5	A)2*B2)3	hcb; Shubnikov hexagonal plane net/(6,3)	triangular	|Cu|	|1|	|3|	|C2N|	1
XOZXUF	C16 H16 N6 Ni1 O2	(6,7-Dihydrodipyrido(1,2-a:2',1'-c)pyrazinedi-ium) tetracyano-nickel(ii)dihydrate.	P.Vitoria,J.I.Beitia,J.M.Gutierrez-Zorrilla,E.R.Saiz,A.Luque,M.Insausti,J.J.Blanco	INORG.CHEM.,2002,41,,4396	P21/n	0D	4	A*M1)4	1,4M5-1	square	|Ni|	|2|	|4|	|C4|	0	-
XOZYAM	C16 H16 N6 O2 Pt1	(6,7-Dihydrodipyrido(1,2-a:2',1'-c)pyrazinedi-ium) tetracyano-platinum(ii)dihydrate.	P.Vitoria,J.I.Beitia,J.M.Gutierrez-Zorrilla,E.R.Saiz,A.Luque,M.Insausti,J.J.Blanco	INORG.CHEM.,2002,41,,4396	P21/n	0D	4	A*M1)4	1,4M5-1	square	|Pt|	|2|	|4|	|C4|	0	-
XOZYEQ	C18 H12 N6 Ni1/Distance=1.90A(Set #1)	5,6-Dihydrodipyrazino(1,2,3,4-lmn)-1,10-phenanthrolinium tetracyano-nickel(ii).	P.Vitoria,J.I.Beitia,J.M.Gutierrez-Zorrilla,E.R.Saiz,A.Luque,M.Insausti,J.J.Blanco	INORG.CHEM.,2002,41,,4396	Pmnm	0D	4	A*M1)4	1,4M5-1	square	|Ni|	|2|	|4|	|C4|	0
XOZYIU	C18 H14 N6 O1 Pt1	5,6-Dihydrodipyrazino(1,2,3,4-lmn)-1,10-phenanthroliniumtetracyano-platinum(ii) monohydrate.	P.Vitoria,J.I.Beitia,J.M.Gutierrez-Zorrilla,E.R.Saiz,A.Luque,M.Insausti,J.J.Blanco	INORG.CHEM.,2002,41,,4396	P21/c	0D	4	A*M1)4	1,4M5-1	square	|Pt|	|2|	|4|	|C4|	0	-
XULBIP	C38.5 H31 Au1 Cl1 N3 P2/Distance=2.00A(Set #1)	bis(Triphenylphosphine)iminium dicyano-gold(i) dichloromethane solvate.	Ruei-Yang Liau,H.Ehlich,A.Schier,H.Schmidbaur	Z.NATURFORSCH.,B:CHEM.SCI.,2002,57,,1085	P21/n	0D	2	A*M1)2	1,2M3-1	linear	|Au|	|1|	|2|	|C2|	0
XUNBEN	C54 H40 Ca2 Fe1 N15 O7/Distance=2.00A(Set #1)	bis(\m~2~-Cyano)-triaqua-tetracyano-(nitrato-O)-tetrakis(1,10-phenanthroline)-di-calcium(ii)-iron(iii) monohydrate.	A.Datta,N.K.Karan,S.Mitra,E.R.T.Tiekink	POLYHEDRON,2002,21,,2237	P-1	0D	6	A*M1)6	1,6M7-1	octahedron	|Fe|	|3|	|6|	|C6|	0
XUPFOD	C54 H40.5 Fe1 N15 O7.25 Sr2/Distance=2.00A(Set #1)	bis(\m~2~-Cyano)-tri-aqua-tetracyano-(nitrato-O,O')-tetrakis(1,10-phenanthroline)-iron(iii)-di-strontium hydrate.	A.Datta,N.K.Karan,S.Mitra,K.M.A.Malik	Z.NATURFORSCH.,B:CHEM.SCI.,2002,57,,1282	P-1	0D	6	A*M1)6	1,6M7-1	octahedron	|Fe|	|3|	|6|	|C6|	0
XUYYOG	C36 H43 Fe1 N12 O8	tris(4-(Pyridin-4-yl)pyridinium) hexacyano-iron(iii) octahydrate.	A.Hazra,P.Kanoo,S.Mohapatra,G.Mostafa,T.K.Maji	CRYSTENGCOMM,2010,12,,2775	P1	0D	6	A*M1)6	1,6M7-1	octahedron	|Fe|	|3|	|6|	|C6|	0	-
YACJIV	C27 H42 Cu1 N5 O2/Distance=2.00A(Set #1)	1,1'-Diheptyl-4,4'-bipyridinium tricyano-copper(i) dihydrate.	M.B.Inoue,L.Machi,M.Inoue,Q.Fernando	INORG.CHIM.ACTA,1992,192,,123	P-1	0D	3	A*M1)3	1,3M4-1	triangular	|Cu|	|1|	|3|	|C3|	0
YARSOB	C24 H21 Cr1 I3 N9	tris(3-iodo-1-methylpyridinium) hexacyano-chromium(iii).	J.E.Ormond-Prout,P.Smart,L.Brammer	CRYST.GROWTH DES.,2012,12,,205	Cc	0D	6	A*M1)6	1,6M7-1	octahedron	|Cr|	|3|	|6|	|C6|	0	-
YARSUH	C28 H27 Fe1 I3 N11	tris(3-iodo-1-methylpyridinium) hexacyano-iron(iii) acetonitrile solvate.	J.E.Ormond-Prout,P.Smart,L.Brammer	CRYST.GROWTH DES.,2012,12,,205	P21/c	0D	6	A*M1)6	1,6M7-1	octahedron	|Fe|	|3|	|6|	|C6|	0	-
YARTAO	C24 H21 Co1 I3 N9	tris(3-iodo-1-methylpyridinium) hexacyano-cobalt(iii).	J.E.Ormond-Prout,P.Smart,L.Brammer	CRYST.GROWTH DES.,2012,12,,205	Cc	0D	6	A*M1)6	1,6M7-1	octahedron	|Co|	|3|	|6|	|C6|	0	-
YARTES	C28 H27 Co1 I3 N11	tris(3-iodo-1-methylpyridinium) hexacyano-cobalt(iii) acetonitrile solvate.	J.E.Ormond-Prout,P.Smart,L.Brammer	CRYST.GROWTH DES.,2012,12,,205	P21/c	0D	6	A*M1)6	1,6M7-1	octahedron	|Co|	|3|	|6|	|C6|	0	-
YARTIW	C24 H21 Br3 Cr1 N9	tris(3-bromo-1-methylpyridinium) hexacyano-chromium(iii).	J.E.Ormond-Prout,P.Smart,L.Brammer	CRYST.GROWTH DES.,2012,12,,205	Cc	0D	6	A*M1)6	1,6M7-1	octahedron	|Cr|	|3|	|6|	|C6|	0	-
YARTOC	C24 H21 Br3 Fe1 N9	tris(3-bromo-1-methylpyridinium) hexacyano-iron(iii).	J.E.Ormond-Prout,P.Smart,L.Brammer	CRYST.GROWTH DES.,2012,12,,205	Cc	0D	6	A*M1)6	1,6M7-1	octahedron	|Fe|	|3|	|6|	|C6|	0	-
YARTUI	C24 H21 Br3 Co1 N9	tris(3-bromo-1-methylpyridinium) hexacyano-cobalt(iii).	J.E.Ormond-Prout,P.Smart,L.Brammer	CRYST.GROWTH DES.,2012,12,,205	Cc	0D	6	A*M1)6	1,6M7-1	octahedron	|Co|	|3|	|6|	|C6|	0	-
YARVAQ	C24 H18 Cr1 I6 N9	tris(3,5-diiodo-1-methylpyridinium) hexacyano-chromium(iii).	J.E.Ormond-Prout,P.Smart,L.Brammer	CRYST.GROWTH DES.,2012,12,,205	C2/c	0D	6	A*M1)6	1,6M7-1	octahedron	|Cr|	|3|	|6|	|C6|	0	-
YARVEU	C24 H18 Fe1 I6 N9	tris(3,5-diiodo-1-methylpyridinium) hexacyano-iron(iii).	J.E.Ormond-Prout,P.Smart,L.Brammer	CRYST.GROWTH DES.,2012,12,,205	C2/c	0D	6	A*M1)6	1,6M7-1	octahedron	|Fe|	|3|	|6|	|C6|	0	-
YARVIY	C24 H18 Co1 I6 N9	tris(3,5-diiodo-1-methylpyridinium) hexacyano-cobalt(iii).	J.E.Ormond-Prout,P.Smart,L.Brammer	CRYST.GROWTH DES.,2012,12,,205	C2/c	0D	6	A*M1)6	1,6M7-1	octahedron	|Co|	|3|	|6|	|C6|	0	-
YARVOE	C24 H26 Br6 Cr1 N9 O4	tris(3,5-Dibromo-1-methylpyridinium) hexacyano-chromium(iii) tetrahydrate.	J.E.Ormond-Prout,P.Smart,L.Brammer	CRYST.GROWTH DES.,2012,12,,205	P-1	0D	6	A*M1)6	1,6M7-1	octahedron	|Cr|	|3|	|6|	|C6|	0	-
YARVUK	C24 H18 Br6 Fe1 N9	tris(3,5-dibromo-1-methylpyridinium) hexacyano-iron(iii).	J.E.Ormond-Prout,P.Smart,L.Brammer	CRYST.GROWTH DES.,2012,12,,205	C2/c	0D	6	A*M1)6	1,6M7-1	octahedron	|Fe|	|3|	|6|	|C6|	0	-
YARWAR	C24 H18 Br6 Co1 N9	tris(3,5-dibromo-1-methylpyridinium) hexacyano-cobalt(iii).	J.E.Ormond-Prout,P.Smart,L.Brammer	CRYST.GROWTH DES.,2012,12,,205	C2/c	0D	6	A*M1)6	1,6M7-1	octahedron	|Co|	|3|	|6|	|C6|	0	-
YASNUC	C46 H34 N14 Pt1	bis(4,4'-Bipyridinium) hexacyanoplatinate(iv) bis(4,4'-bipyridine).	J.A.Schlueter,R.J.Funk,U.Geiser	ACTA CRYSTALLOGR.,SECT.C:CRYST.STRUCT.COMMUN.,2005,61,,m304	P-1	0D	6	A*M1)6	1,6M7-1	octahedron	|Pt|	|4|	|6|	|C6|	0	-
YAWDOQ	C61 H60 Cd6 N20 O7/Distance=2.40A(Set #1)	catena-[dodecakis(\m~2~-Cyano)-tetracyano-hexa-cadmium(ii)bis(methylviologen) tris(m-cresol) tetrahydrate clathrate].	H.Yoshikawa,S.Nishikiori	DALTON TRANS.,2005,,,3056	Pnan	2D	2.67	A)3*B2)6*M1)2	kgd; Shubnikov plane net (3.6.3.6)/dual	octahedron & tetrahedron	|Cd|	|2|	|4|6|	|C4|N6|	1
YEBZAI	C16 H10 Au1 N4 S6 Se2/Distance=2.10A(Set #1)	Tetracyano-gold2-(5-isopropylidene[1,3]dithiolo[4,5-d][1,3]dithiol-2-ylidene)-5,6-dihydro[1,4]diselenino[2,3-d][1,3]dithiole.	K.Furuta,S.Kohno,T.Shirahata,K.Yamasaki,S.Hino,Y.Misaki	Crystals,2012,2,,393	Pnma	0D	4	A*M1)4	1,4M5-1	square	|Au|	|3|	|4|	|C4|	0
YEFNEC	C6 H9 Cd1 Cl1 N2/Distance=2.20A(Set #1)	catena-(bis(\m~2~-Cyano)-cadmium 2-chloro-2-methylpropane clathrate).	T.Kitazawa,S.-I.Nishikiori,R.Kuroda,T.Iwamoto	J.CHEM.SOC.,DALTON TRANS.,1994,,,1029	Fd3m	3D	2	A*B2)2	dia Diamond; 4/6/c1; sqc6	tetrahedron	|Cd|	|2|	|4|	|C4|	1
YEFNIG	C5 H6 Cd1 Cl2 N2/Distance=2.30A(Set #1)	catena-(bis(\m~2~-Cyano)-cadmium 2,2-dichloropropane clathrate).	T.Kitazawa,S.-I.Nishikiori,R.Kuroda,T.Iwamoto	J.CHEM.SOC.,DALTON TRANS.,1994,,,1029	Fd-3m	3D	2	A*B2)2	dia Diamond; 4/6/c1; sqc6	tetrahedron	|Cd|	|2|	|4|	|C4|	1
YEFNOM	C4 H3 Cd1 Cl3 N2/Distance=2.20A(Set #1)	catena-(bis(\m~2~-Cyano)-cadmium 1,1,1-trichloroethane clathrate).	T.Kitazawa,S.-I.Nishikiori,R.Kuroda,T.Iwamoto	J.CHEM.SOC.,DALTON TRANS.,1994,,,1029	Fd3m	3D	2	A*B2)2	dia Diamond; 4/6/c1; sqc6	tetrahedron	|Cd|	|2|	|4|	|C4|	1
YEFPAA	C6 Cd1 Cl8 Hg1 N4/Distance=2.30A(Set #1)	catena-(tetrakis(\m~2~-Cyano)-cadmium-mercury bis(tetrachloromethane)clathrate).	T.Kitazawa,S.-I.Nishikiori,R.Kuroda,T.Iwamoto	J.CHEM.SOC.,DALTON TRANS.,1994,,,1029	Fd-3m	3D	2	A*B2)2	dia Diamond; 4/6/c1; sqc6	tetrahedron	|Cd|	|2|	|4|	|C4|	1
YEFPEE	C6 Cd1 Cl8 N4 Zn1/Distance=2.10A(Set #1)	catena-(tetrakis(\m~2~-Cyano)-cadmium-zinc bis(tetrachloromethane) clathrate).	T.Kitazawa,S.-I.Nishikiori,R.Kuroda,T.Iwamoto	J.CHEM.SOC.,DALTON TRANS.,1994,,,1029	Fd3m	3D	2	A*B2)2	dia Diamond; 4/6/c1; sqc6	tetrahedron	|Cd|	|2|	|4|	|C4|	1
YEFPII	C8.89 H12 Cl3.56 Cu1 N5 Zn1	catena-(Tetramethylammonium tetrakis(\m~2~-cyano)-copper-zinctetrachloromethane clathrate).	T.Kitazawa,S.-I.Nishikiori,R.Kuroda,T.Iwamoto	,1994,,,1029	F-43m	3D	2	A*B2)2	dia Diamond; 4/6/c1; sqc6	tetrahedron	|Cu|Zn|	|1|2|	|4|	|C4|N4|	1
YEFPUU	C9 H12 Cd1 Cl4 Cu1 N5/Distance=2.20A(Set #2)	catena-(Tetramethylammonium tetrakis(\m~2~-cyano)-cadmium-coppertetrachloromethane clathrate).	T.Kitazawa,S.-I.Nishikiori,R.Kuroda,T.Iwamoto	J.CHEM.SOC.,DALTON TRANS.,1994,,,1029	F-43m	3D	2	A*B2)2	dia Diamond; 4/6/c1; sqc6	tetrahedron	|Cu|Cd|	|1|2|	|4|	|C4|N4|	1
YINXUP	C20 H8 Au1 I4 N4 S4 Se8	bis(2-(4,5-Diiodo-1,3-diselenol-2-ylidene)-5,6-dihydro-1,4-diselenino[2,3-d](1,3)dithiole) tetracyano-gold.	T.Imakubo,T.Shirahata,M.Kibune,H.Yoshino	EUR.J.INORG.CHEM.,2007,,,4727	P-1	0D	4	A*M1)4	1,4M5-1	square	|Au|	|3|	|4|	|C4|	0	-
YINYAW	C20 H8 Au1 I4 N4 Se12	bis(2-(4,5-Diiodo-1,3-diselenol-2-ylidene)-5,6-dihydro-1,3-diselenolo[4,5-b](1,4)diselenine) tetracyano-gold.	T.Imakubo,T.Shirahata,M.Kibune,H.Yoshino	EUR.J.INORG.CHEM.,2007,,,4727	P-1	0D	4	A*M1)4	1,4M5-1	square	|Au|	|3|	|4|	|C4|	0	-
YINYEA	C20 H8 Au1 I4 N4 S4 Se8	bis(2-(5,6-Dihydro-1,3-diselenolo[4,5-b](1,4)diselenin-2-ylidene)-4,5-diiodo-1,3-dithiole) tetracyano-gold.	Imakubo T.,Shirahata T.,Kibune M.,Yoshino H.	EUR.J.INORG.CHEM.,2007,,,4727	C2/c	0D	4	A*M1)4	1,4M5-1	square	|Au|	|3|	|4|	|C4|	0	-
YINYIE	C20 H8 Au1 I4 N4 S8 Se4	bis(2-(4,5-Diiodo-1,3-diselenol-2-ylidene)-5,6-dihydro-1,3-dithiolo[4,5-b](1,4)dithiine) tetracyano-gold.	T.Imakubo,T.Shirahata,M.Kibune,H.Yoshino	EUR.J.INORG.CHEM.,2007,,,4727	P-1	0D	4	A*M1)4	1,4M5-1	square	|Au|	|3|	|4|	|C4|	0	-
YIWLIZ	C16 H22 Cd3 Cl2 N8/Distance=2.40A(Set #1)	catena-(Tetraethylammonium heptacyano-tri-cadmium dichloromethane clathrate).	T.Kitazawa,S.Nishikiori,T.Iwamoto	J.CHEM.SOC.,DALTON TRANS.,1994,,,3695	R-3m	3D	2.33	A)3*B2)7	fsh 4,6-conn	octahedron & tetrahedron	|Cd|	|2|	|6|4|	|N6|C4|	1
YIWLOF	C15 H20 Cd3 Cl3 N9/Distance=2.40A(Set #2)	catena-(3-Aminopropyl(diethyl)ammonium heptacyano-tri-cadmium chloroformclathrate).	T.Kitazawa,S.Nishikiori,T.Iwamoto	J.CHEM.SOC.,DALTON TRANS.,1994,,,3695	R-3m	3D	2.33	A)3*B2)7	fsh 4,6-conn	octahedron & tetrahedron	|Cd|	|2|	|6|4|	|N6|C4|	1
YIWLUL	C13 H14 Cd3 Cl2 N8/Distance=2.40A(Set #1)	catena-(Tetramethylammonium heptacyano-tri-cadmium trans-1,2-dichloroetheneclathrate).	T.Kitazawa,S.Nishikiori,T.Iwamoto	J.CHEM.SOC.,DALTON TRANS.,1994,,,3695	Pn21m	3D	2.33	A)3*B2)7	4,6T52	octahedron & tetrahedron	|Cd|	|2|	|6|4|	|N6|C4|	1
YIWMEW	C20 H25 Cd3 N9/Distance=2.40A(Set #1)	catena-(3-Aminopropyl(diethyl)ammonium heptacyano-tri-cadmium benzeneclathrate).	T.Kitazawa,S.Nishikiori,T.Iwamoto	J.CHEM.SOC.,DALTON TRANS.,1994,,,3695	Pn21m	3D	2.33	A)3*B2)7	4,6T52	octahedron & tetrahedron	|Cd|	|2|	|6|4|	|N6|C4|	1
YIWMIA	C22 H21 Cd3 N7 S1/Distance=2.50A(Set #2)	catena-(Trimethylsulfide heptacyano-tri-cadmium dibenzene clathrate).	T.Kitazawa,S.Nishikiori,T.Iwamoto	J.CHEM.SOC.,DALTON TRANS.,1994,,,3695	Pnam	3D	2.33	A)3*B2)7	fsk	octahedron & tetrahedron	|Cd|	|2|	|6|4|	|N6|C4|	1
YIWMOG	C20 H21 Cd3 N8/Distance=2.40A(Set #1)	catena-(Tetramethylammonium heptacyano-tri-cadmium benzene clathrate).	Kitazawa T.,Nishikiori S.,Iwamoto T.	J.CHEM.SOC.,DALTON TRANS.,1994,,,3695	Pnam	3D	2.33	A)3*B2)7	fsk	octahedron & tetrahedron	|Cd|	|2|	|6|4|	|N6|C4|	1
YIWMUM	C18 H20 Cd3 N8/Distance=2.40A(Set #1)	catena-(Tetramethylammonium heptacyano-tri-cadmium toluene clathrate).	T.Kitazawa,S.Nishikiori,T.Iwamoto	J.CHEM.SOC.,DALTON TRANS.,1994,,,3695	Pnam	3D	2.33	A)3*B2)7	fsk	octahedron & tetrahedron	|Cd|	|2|	|6|4|	|N6|C4|	1
YIWNAT	C16.94 H19.92 Cd3 N8/Distance=2.40A(Set #1)	catena-(Tetramethylammonium heptacyano-tri-cadmium 1,3,5-trimethylbenzeneclathrate).	Kitazawa T.,Nishikiori S.,Iwamoto T.	J.CHEM.SOC.,DALTON TRANS.,1994,,,3695	Pnam	3D	2.33	A)3*B2)7	fsk	octahedron & tetrahedron	|Cd|	|2|	|6|4|	|N6|C4|	1
YIWNIB	C15 H20 Cd3 Cl4 N8/Distance=2.90A(Set #3)	catena-(Tetramethylammonium heptacyano-tri-cadmium bis(1,2-dichloroethane)clathrate).	Kitazawa T.,Nishikiori S.,Iwamoto T.	J.CHEM.SOC.,DALTON TRANS.,1994,,,3695	P63/mmc	3D	2.33	A)3*B2)7	xat	octahedron & tetrahedron	|Cd|	|2|	|6|4|	|N6|C4|	1
YIWNOH	C15 H16 Cd3 Cl4 N8/Distance=2.40A(Set #1)	catena-(Tetramethylammonium heptacyano-tri-cadmium bis(1,1-dichloroethene)clathrate).	T.Kitazawa,S.Nishikiori,T.Iwamoto	J.CHEM.SOC.,DALTON TRANS.,1994,,,3695	P63/mmc	3D	2.33	A)3*B2)7	xat	octahedron & tetrahedron	|Cd|	|2|	|6|4|	|N6|C4|	1
YIWNUN	C17 H22 Cd3 N10/Distance=2.40A(Set #2)	catena-(Tetramethylammonium heptacyano-tri-cadmium bis(ethylnitrile)clathrate).	T.Kitazawa,S.Nishikiori,T.Iwamoto	J.CHEM.SOC.,DALTON TRANS.,1994,,,3695	P63/mmc	3D	2.33	A)3*B2)7	xat	octahedron & tetrahedron	|Cd|	|2|	|6|4|	|N6|C4|	1
YIWPAV	C14 H17 Cd3 Cl4 N7 S1/Distance=2.40A(Set #1)	catena-(Trimethylsulfide heptacyano-tri-cadmium bis(1,2-dichloroethane)clathrate).	T.Kitazawa,S.Nishikiori,T.Iwamoto	J.CHEM.SOC.,DALTON TRANS.,1994,,,3695	P63/mmc	3D	2.33	A)3*B2)7	xat	octahedron & tetrahedron	|Cd|	|2|	|6|4|	|N6|C4|	1
YIWPEZ	C13 H17 Cd3 Cl4 N9/Distance=2.30A(Set #1)	catena-(3-Aminopropyl(methyl)ammonium heptacyano-tri-cadmiumbis(dichloromethane) clathrate).	T.Kitazawa,S.Nishikiori,T.Iwamoto	J.CHEM.SOC.,DALTON TRANS.,1994,,,3695	P63/mmc	3D	2.33	A)3*B2)7	xat	octahedron & tetrahedron	|Cd|	|2|	|6|4|	|N6|C4|	1
YIWPID	C16 H23 Cd3 Cl2 N9/Distance=2.50A(Set #1)	catena-(3-Dimethylaminopropyl(dimethyl)ammonium heptacyano-tri-cadmium1,2-dichloroethane clathrate).	T.Kitazawa,S.Nishikiori,T.Iwamoto	J.CHEM.SOC.,DALTON TRANS.,1994,,,3695	Pb21m	3D	2.33	A)3*B2)7	fsm	octahedron & tetrahedron	|Cd|	|2|	|6|4|	|N6|C4|	1
YOCKIL	C18 H20 Ag2 N8	2,2'-(p-Phenylene)bis(1,4,5,6-tetrahydropyrimidinium)bis(dicyanidoargentate(i)).	Zhi-Yu JIANG,Hua-Ze DONG,Gong ZHANG,Lin CHENG	ACTA CRYSTALLOGR.,SECT.E:STRUCT.REP.ONLINE,2008,64,,m858	P-1	0D	2	A*M1)2	1,2M3-1	linear	|Ag|	|1|	|2|	|C2|	0	-
YOLGUB	C87 H68 Cu9 N21 O1/Distance=2.10A(Set #1)	catena-(tris(1,1'-Dibenzyl-4,4'-bipyridinium)pentadecakis(\m~2~-cyano)-nona-copper(i) monohydrate).	M.B.Inoue,M.Inoue,L.Machi,F.Brown,Q.Fernando	INORG.CHIM.ACTA,1995,230,,145	P21	3D	1.67	A)3*B2)5	3,3,3,3,3,3,4,4,4T2	tetrahedron & triangular	|Cu|	|1|	|4|3|	|C3|CN3|C2N|	1
YOTVAE	C44 H40 N4 Ni1 O4 S32/Distance=2.00A(Set #2)	tetrakis(bis(Ethylenedithio)tetrathiafulvalene) tetracyano-nickel(ii)tetrahydrate.	M.Fettouhi,L.Ouahab,D.Grandjean,L.Ducasse,J.Amiell,R.Canet,P.Delhaes	Chem.Mater.,1995,7,,461	P21/c	0D	4	A*M1)4	1,4M5-1	square	|Ni|	|2|	|4|	|C4|	0
YOTVIM	C44 H32 N4 Ni0.55 Pt0.45 S32/Distance=2.00A(Set #1)	tetrakis(bis(Ethylenedithio)tetrathiafulvalene) tetracyano-nickel(ii)tetracyano-platinum(ii).	M.Fettouhi,L.Ouahab,D.Grandjean,L.Ducasse,J.Amiell,R.Canet,P.Delhaes	Chem.Mater.,1995,7,,461	C2/c	0D	4	A*M1)4	1,4M5-1	square	|Ni|	|2|	|4|	|C4|	0
YOTVOS	C44 H40 N4 Ni0.48 O4 Pt0.52 S32/Distance=2.10A(Set #2)	tetrakis(bis(Ethylenedithio)tetrathiafulvalene) tetracyano-nickel(ii)tetracyano-platinum(ii) tetrahydrate.	M.Fettouhi,L.Ouahab,D.Grandjean,L.Ducasse,J.Amiell,R.Canet,P.Delhaes	Chem.Mater.,1995,7,,461	P21/c	0D	4	A*M1)4	1,4M5-1	square	|Ni|	|2|	|4|	|C4|	0
YOTVUY	C44 H40 N4 Ni0.14 O4 Pt0.86 S32/Distance=2.00A(Set #1)	\a-tetrakis(bis(Ethylenedithio)tetrathiafulvalene) tetracyano-nickel(ii)tetracyano-platinum(ii) tetrahydrate.	M.Fettouhi,L.Ouahab,D.Grandjean,L.Ducasse,J.Amiell,R.Canet,P.Delhaes	Chem.Mater.,1995,7,,461	P21/n	0D	4	A*M1)4	1,4M5-1	square	|Ni|	|2|	|4|	|C4|	0
ZAFXAF	C12.8 H6 Au0.4 N0.8 S8/Distance=1.60A(Set #1)	2-(1,3-Dithiol-2-ylidene)-5-(2-ethanediylidene-1,3-dithiole)-1,3,4,6-tetrathiapentalene dicyano-gold.	Y.Misaki,N.Higuchi,H.Fujiwara,T.Yamabe,T.Mori,H.Mori,S.Tanaka	Angew.Chem.,Int.Ed.,1995,34,,1222	P1	1D	1	A*B2	2C1	linear	|Au|	|1|	|2|	|C2|	1
ZANPIP	C44 H39 Fe1 N12 O4	tris(1,10-phenanthrolin-1-ium) hexacyano-iron(iii) ethanol solvate trihydrate.	Xiao-Qing Liu,Deng-Yong Yu,Ai-Hua Yuan	ACTA CRYSTALLOGR.,SECT.E:STRUCT.REP.ONLINE,2012,68,,m701	P21/c	0D	6	A*M1)6	1,6M7-1	octahedron	|Fe|	|3|	|6|	|C6|	0	-
ZAPLUX	C36 H16 I8 N4 Pd1 S16 Se8	tetrakis(Di-iodoethylenedithiodiselenadithiafulvalene) tetracyano-palladium.	T.Imakubo,H.Sawa,R.Kato	CHEM.COMMUN.,1995,,,1667	C2/m	0D	4	A*M1)4	1,4M5-1	square	|Pd|	|2|	|4|	|C4|	0	-
ZENZEX	C22 H16 Ag1 N2 O8 S8	bis(3,4:3',4'-bis(Ethylenedioxo)-2,2',5,5'-tetrathiafulvalene) dicyano-silver.	R.Li,V.Petricek,I.Cisarova,P.Coppens	ACTA CRYSTALLOGR.,SECT.B:STRUCT.SCI.,1995,51,,798	P-1	0D	2	A*M1)2	1,2M3-1	linear	|Ag|	|1|	|2|	|C2|	0	-
ZIGKIJ	C32 H20 Au1 N2 S24	bis(2-(4,5-Ethylenedithio-1,3-dithiol-2-ylidene)-5-(4,5-trimethylenedithio-1,3-dithiol-2-ylidene)-1,3,4,6-tetrathiapentalene) dicyano-gold.	T.Mori,Y.Misaki,T.Yamabe	BULL.CHEM.SOC.JPN.,1994,67,,3187	P-1	0D	2	A*M1)2	1,2M3-1	linear	|Au|	|1|	|2|	|C2|	0	-
ZITRUP	C8 H12 Li1 N5 Zn1/Distance=2.10A(Set #2)	catena-(Tetramethylammonium tetrakis(\m~2~-cyano)-lithium-zinc).	Xianhui Bu,T.E.Gier,G.D.Stucky	ACTA CRYSTALLOGR.,SECT.C:CRYST.STRUCT.COMMUN.,1996,52,,14	F-43m	3D	2	A*B2)2	dia Diamond; 4/6/c1; sqc6	tetrahedron	|Li|Zn|	|1|2|	|4|	|C4|N4|	1
ZURRUZ	C12 H14 N6 Ni1	p-Xylylenediammonium tetracyano-nickel(ii).	H.Yuge,Y.Noda,T.Iwamoto	INORG.CHEM.,1996,35,,1842	P-1	0D	4	A*M1)4	1,4M5-1	square	|Ni|	|2|	|4|	|C4|	0	-
ZUSKON	C84 H118 Fe1 I3 N24 O14/Distance=2.00A(Set #1)	hexakis(2-(3-N-Methylpyridinium)-4,4,5,5-tetramethyl-4,5-dihydro-1H-imidazo-1-oxyl 3-N-oxide) hexacyano-iron tri-iodide dihydrate.	C.Michaut,L.Ouahab,P.Bergerat,O.Kahn,A.Bousseksou	J.AM.CHEM.SOC.,1996,118,,3610	P3	0D	6	A*M1)6	1,6M7-1	octahedron	|Fe|	|3|	|6|	|C6|	0
ZUSKUT	C84 H118 Co1 I3 N24 O14/Distance=2.00A(Set #1)	hexakis(2-(3-N-Methylpyridinium)-4,4,5,5-tetramethyl-4,5-dihydro-1H-imidazo-1-oxyl 3-N-oxide) hexacyano-cobalt tri-iodide dihydrate.	C.Michaut,L.Ouahab,P.Bergerat,O.Kahn,A.Bousseksou	J.AM.CHEM.SOC.,1996,118,,3610	P3	0D	6	A*M1)6	1,6M7-1	octahedron	|Co|	|3|	|6|	|C6|	0
ZUSLAA	C84 H118 Cr1 I3 N24 O14/Distance=2.10A(Set #1)	hexakis(2-(3-N-Methylpyridinium)-4,4,5,5-tetramethyl-4,5-dihydro-1H-imidazo-1-oxyl 3-N-oxide) hexacyano-chromium tri-iodide dihydrate.	C.Michaut,L.Ouahab,P.Bergerat,O.Kahn,A.Bousseksou	J.AM.CHEM.SOC.,1996,118,,3610	P3	0D	6	A*M1)6	1,6M7-1	octahedron	|Cr|	|3|	|6|	|C6|	0
28656	Li2CuFe(CN)6	Dilithium Copper Hexacyanoferrate(II).	Rigamonti R.	Gazzetta Chimica Italiana,1937,67,,146-158	F-43m	3D	3	A*B2)3	pcu alpha-Po primitive cubic; 6/4/c1; sqc1	octahedron	|Fe|Cu|	|2|	|6|	|C6|N6|	1	-
417823	Mn2(Ru(CN)6)	Dimanganese Hexacyanoruthenate(II).	Rodriguez-Hernandez,Gomez A.,Reguera E.	Journal of Physics D: Applied Physics,2007,40,,6076-6082	P-3	3D	2	A*B3)2	3,6,6T20	octahedron	|Mn|Ru|	|2|	|6|	|N6|C6|	1	-
417825	Mn2(Os(CN)6)	Dimanganese Hexacyanosmate(II).	Rodriguez-Hernandez,Gomez A.,Reguera E.	Journal of Physics D: Applied Physics,2007,40,,6076-6082	P-3	3D	2	A*B3)2	3,6,6T20	octahedron	|Mn|Os|	|2|	|6|	|N6|C6|	1	-
417826	Cd2(Fe(CN)6)	Dicadmium Hexacyanoferrate(II).	Rodriguez-Hernandez,Gomez A.,Reguera E.	Journal of Physics D: Applied Physics,2007,40,,6076-6082	P-3	3D	2	A*B3)2	3,6,6T20	octahedron	|Fe|Cd|	|2|	|6|	|C6|N6|	1	-
425667	LuCo(CN)6	Lutetium(III)-hexacyanocobaltate(III).	Duyker Samuel G.,Peterson Vanessa K.,Kearley Gordon J.,Ramirez-Cuesta Anibal J.,Kepert Cameron J.	Angew. Chem. Int. ed.,2013,52,20,5266-5270	P63/mmc	3D	3	A*B2)3	nia	octahedron & trigonal prism	|Co|Lu|	|3|	|6|	|C6|N6|	1	-
FEJJIN10	C32 H78 Cl2 Co2 N22 O10	1,16,4,7,10,13,19,22,25,28-Diazaocta-azoniacyclotriacontanebis(hexacyano-cobalt(iii)) dichloride decahydrate.	A.Bencini,A.Bianchi,E.Garcia-Espana,M.Giusti,S.Mangani,M.Micheloni,P.Orioli,P.Paoletti	INORG.CHEM.,1987,26,,3902	P-1	0D	6	A*M1)6	1,6M7-1	octahedron	|Co|	|3|	|6|	|C6|	0	-
YIRZIJ	C20 H8 Au1 I4 N4 S4 Se8	bis(2-(4,5-Diiodo-1,3-diselenol-2-ylidene)-5,6-dihydro-1,3-diselenolo[4,5-b](1,4)dithiine) tetracyano-gold.	T.Imakubo,T.Shirahata,M.Kibune,H.Yoshino	EUR.J.INORG.CHEM.,2007,,,4727	P-1	0D	4	A*M1)4	1,4M5-1	square	|Au|	|3|	|4|	|C4|	0	-
EJELUA	C28 H48 Ag2 K2 N4 O12/Distance=2.10A(Set #1)	catena-[tetrakis(\m~2~-Cyano)-bis(1,4,7,10,13,16-hexaoxacyclooctadecane)-di-potassium-di-silver(i)].	J.A.Schlueter,U.Geiser	ACTA CRYSTALLOGR.,SECT.C:CRYST.STRUCT.COMMUN.,2003,59,,m325	P21/n	0D	2	A*M1)2	1,2M3-1	linear	|Ag|	|1|	|2|	|C2|	0
ELONUO	C42 H86 Cr1 K3 N6 O25/Distance=2.10A(Set #1)	bis(\m~2~-Aqua)-diaqua-tris(18-crown-6)-tri-potassium hexacyano-chromiumtrihydrate.	Bei-Chuan Zhou,Hui-Zhong Kou,Yi He,Ru-Ji Wang,Ya-Dong Li,Hong-Gen Wang	CHIN.J.CHEM.,2003,21,,352	P-1	0D	6	A*M1)6	1,6M7-1	octahedron	|Cr|	|3|	|6|	|C6|	0
OSINOU	C44 H80 Cl4 K3 N6 O20 Ru1/Distance=2.10A(Set #1)	bis(\m~2~-cyano)-bis(18-crown-6)-tetracyano-di-potassium-ruthenium(iii)(18-crown-6)-diaqua-potassium dichloromethane solvate.	K.E.Vostrikova,E.V.Peresypkina	EUR.J.INORG.CHEM.,2011,,,811	P-1	0D	6	A*M1)6	1,6M7-1	octahedron	|Ru|	|3|	|6|	|C6|	0
YACXUW	C32 H56 Cd2 K4 N8 O16/Distance=2.30A(Set #1)	catena-(bis(\m~2~-Cyano-C,C,N)-hexakis(\m~2~-cyano-C,N)-tetra-aqua-bis(18-crown-6)-di-cadmium-tetra-potassium).	Guo-Fang He	GUANGPU SHIYANSHI(CHIN.)(CHINESE J.SPECTROSCOPY LAB.),2003,20,,716	P21/n	0D	4	A*M1)4	1,4M5-1	tetrahedron	|Cd|	|2|	|4|	|C4|	0
CYAN_288	C4 Au2 N4 Zn1/4fold dia				P-4b2	3D	1.33	A)3*B2)4	dia Diamond; 4/6/c1; sqc6	tetrahedron & linear	|Zn|Au|	|2|1|	|4|2|	|C4|N2|	4	Ia
CYAN_290	C4 Au2 N4 Zn1/3fold mok delta		Katz MICHAEL J.,Ramnial TARAMATEE,Yu HUA-ZHONG,Leznoff DANIEL B.	American Journal of Science, Serie 5(1,1921-1938),0,?,?,?-?	C12/c1	3D	1.33	A)3*B2)4	mok; sev-4-Cccm	tetrahedron & linear	|Zn|Au|	|2|1|	|4|2|	|N4|C2|	3	Ia
CYAN_289	C4 Au2 N4 Zn1/5fold dia		Katz MICHAEL J.,Ramnial TARAMATEE,Yu HUA-ZHONG,Leznoff DANIEL B.	American Journal of Science, Serie 5(1,1921-1938),0,?,?,?-?	C12/c1	3D	1.33	A)3*B2)4	dia Diamond; 4/6/c1; sqc6	tetrahedron & linear	|Zn|Au|	|2|1|	|4|2|	|N4|C2|	5	Ia

## Sheet: Molecules
	0D_real	0D	1D	2D	3D		0D	543	1D	15	2D	41	3D	211
Ag(CN)(NC)	1	1	0	0	0		Ag(CN)2	39	Ag(CN)	2	Ag(CN)	1	Ag(CN)2	6
Ag(CN)2	39	39	1	5	6		Au(CN)2	52	Ag(CN)2	1	Ag(CN)2	4	Al(CN)3	1
Au(CN)2	52	52	0	0	9		Au(CN)4	29	Au(CN)	4	Cd(CN)4	1	Au(CN)2	9
Au(CN)4	29	29	0	0	0		Cd(CN)3	1	Cu(CN)	2	Cu(CN)	6	Be(CN)2	1
Cd(CN)3	1	1	0	0	18		Cd(CN)4	2	Cu(CN)2	5	Cu(CN)2	16	Cd(CN)2	19
Cd(CN)4	2	2	0	1	12		Co(CN)3	2	Zn(CN)4	1	Cu(CN)3	1	Cd(CN)3	18
Co(CN)3	2	2	0	0	0		Co(CN)4	2			Fe(CN)6	4	Cd(CN)4	12
Co(CN)4	2	2	0	0	0		Co(CN)5	4			Mn(CN)6	1	Co(CN)6	19
Co(CN)5	4	4	0	0	0		Co(CN)6	42			Ni(CN)4	1	Cr(CN)6	8
Co(CN)6	42	42	0	0	19		Cr(CN)6	27			Pd(CN)2	1	Cu(CN)	1
Cr(CN)4	1	1	0	0	0		Cu(CN)2	1			Pt(CN)2	1	Cu(CN)2	15
Cr(CN)6	27	27	0	0	8		Cu(CN)3	1			W(CN)8	4	Cu(CN)3	2
Cu(CN)2	1	1	5	16	15		Cu(CN)4	1					Cu(CN)4	10
Cu(CN)3	1	1	0	1	2		Fe(CN)6	114					Fe(CN)6	51
Cu(CN)4	1	1	0	0	10		Hg(CN)2	5					Ga(CN)3	1
Fe(CN)6	114	114	0	4	51		Hg(CN)4	6					Hg(CN)4	1
Hg(CN)2	8	5	0	0	0		Ir(CN)3	1					In(CN)3	1
Hg(CN)4	6	6	0	0	1		Mn(CN)4	2					Ir(CN)6	1
Ir(CN)3	1	1	0	0	0		Mn(CN)6	9					Li(CN)	1
Mn(CN)4	2	2	0	0	0		Mo(CN)4	1					Li(CN)4	1
Mn(CN)6	9	9	0	1	7		Mo(CN)6	2					Mg(CN)2	1
Mo(CN)4	1	1	0	0	0		Mo(CN)7	3					Mn(CN)2	1
Mo(CN)5	1	1	0	0	0		Mo(CN)8	15					Mn(CN)6	7
Mo(CN)6	2	2	0	0	0		Nb(CN)8	2					Ni(CN)4	3
Mo(CN)7	3	3	0	0	0		Ni(CN)3	2					Os(CN)6	2
Mo(CN)8	15	15	0	0	0		Ni(CN)4	39					Pd(CN)4	1
Nb(CN)8	2	2	0	0	0		Os(CN)6	1					Pd(CN)6	1
Ni(CN)3	2	2	0	0	0		Pd(CN)4	17					Pt(CN)4	2
Ni(CN)4	39	39	0	1	3		Pt(CN)4	82					Rh(CN)6	7
Os(CN)6	1	1	0	0	2		Pt(CN)6	1					Ru(CN)6	2
Pd(CN)4	17	17	0	0	1		Re(CN)7	2					Zn(CN)2	3
Pt(CN)4	82	82	0	0	2		Re(CN)8	1					Zn(CN)4	3
Pt(CN)6	1	1	0	0	0		Rh(CN)6	1
Re(CN)7	2	2	0	0	0		Ru(CN)6	6
Re(CN)8	1	1	0	0	0		Ti(CN)6	1
Rh(CN)6	1	1	0	0	7		Tl(CN)4	2
Ru(CN)6	6	6	0	0	2		V(CN)6	2
Ti(CN)6	1	1	0	0	0		V(CN)7	2
Tl(CN)4	2	2	0	0	0		W(CN)8	14
V(CN)6	2	2	0	0	0		Zn(CN)4	4
V(CN)7	2	2	0	0	0		Cr(CN)4	1
W(CN)8	14	14	0	4	0		Mo(CN)5	1
Zn(CN)4	4	4	1	0	3		Ag(CN)(NC)	1
Sum	546	543	7	33	178
All		543	15	41	211
Other	0		8	8	33
			0.533333	0.195122	0.156398

## Sheet: Table S2 Me environment
RefCode	Atom	Me	AtNum	AtGroup	OxS	Ordering	Cn	CCp	Cp
300	Pt1	Pt	78	10	2	1	4	C4	square
314	Pt1	Pt	78	10	2	1	4	C4	square
314	Pt2	Pt	78	10	2	1	4	C4	square
315	Pt1	Pt	78	10	2	1	4	C4	square
315	Pt2	Pt	78	10	2	1	4	C4	square
804	Li1	Li	3	1	1	1	0	N6	octahedron
804	Cr1	Cr	24	6	3	1	6	C6	octahedron
851	Pt1	Pt	78	10	2	1	4	C4	square
871	Pt1	Pt	78	10	2	1	4	C4	square
871	Pt2	Pt	78	10	2	1	4	C4	square
871	Pt3	Pt	78	10	2	1	4	C4	square
921	Pt1	Pt	78	10	2	1	4	C4	square
976	Pt1	Pt	78	10	2	1	4	C4	square
976	Pt2	Pt	78	10	2	1	4	C4	square
983	Cr1	Cr	24	6	2	1	6	C6	octahedron
1003	Cu1	Cu	29	11	1	1	3	C2N	triangular
1009	Pt1	Pt	78	10	2	1	4	C4	square
1009	Pt2	Pt	78	10	2	1	4	C4	square
1052	Pt1	Pt	78	10	2	1	4	C4	square
1175	Pt1	Pt	78	10	2	1	4	C4	square
1229	Pt1	Pt	78	10	2	1	4	C4	square
1279	Mn2	Mn	25	7	-2	0.5	0	C12N12	cuboctahedron
1279	Mn1	Mn	25	7	2	1	6	N6	octahedron
1279	Co1	Co	27	9	3	1	6	C6	octahedron
1367	Fe1	Fe	26	8	2	1	6	C6	octahedron
1538	Pt1	Pt	78	10	2	1	4	C4	square
1538	Pt2	Pt	78	10	2	1	4	C4	square
1539	Pt1	Pt	78	10	2	1	4	C4	square
1539	Pt2	Pt	78	10	2	1	4	C4	square
1541	Pt1	Pt	78	10	2	1	4	C4	square
1541	Pt2	Pt	78	10	2	1	4	C4	square
1542	Pt1	Pt	78	10	2	1	4	C4	square
1542	Pt2	Pt	78	10	2	1	4	C4	square
1686	Pt1	Pt	78	10	2	1	4	C4	square
2175	Pt1	Pt	78	10	2	1	4	C4	square
2175	Pt2	Pt	78	10	2	1	4	C4	square
2176	Pt1	Pt	78	10	2	1	4	C4	square
2176	Pt2	Pt	78	10	2	1	4	C4	square
2177	Pt1	Pt	78	10	2	1	4	C4	square
2177	Pt2	Pt	78	10	2	1	4	C4	square
2223	Pt1	Pt	78	10	2	1	4	C4	square
2223	Pt2	Pt	78	10	2	1	4	C4	square
2288	Pt1	Pt	78	10	2	1	4	C4	square
2293	Pt1	Pt	78	10	2	1	4	C4	square
2293	Pt2	Pt	78	10	2	1	4	C4	square
2727	Co1	Co	27	9	3	1	6	C6	octahedron
2727	Co2	Co	27	9	3	1	6	C6	octahedron
2727	Co3	Co	27	9	3	1	6	C6	octahedron
2781	Au1	Au	79	11	3	1	4	C4	square
2815	Fe1	Fe	26	8	2	1	6	C6	octahedron
2815	Fe2	Fe	26	8	3	1	6	C6	octahedron
2863	Fe1	Fe	26	8	2	1	6	C6	octahedron
2863	Fe2	Fe	26	8	2	1	6	C6	octahedron
2863	Fe3	Fe	26	8	3	1	6	C6	octahedron
2864	Fe1	Fe	26	8	2	1	6	C6	octahedron
2864	Fe2	Fe	26	8	3	1	6	C6	octahedron
4095	Pd1	Pd	46	10	2	1	4	C4	square
4095	Pd2	Pd	46	10	2	1	4	C4	square
4175	Pt1	Pt	78	10	2	1	4	C4	square
4175	Pt2	Pt	78	10	2	1	4	C4	square
4177	Pt1	Pt	78	10	2	1	4	C4	square
4177	Pt2	Pt	78	10	2	1	4	C4	square
4412	Pt1	Pt	78	10	2	1	4	C4	square
4413	Pt1	Pt	78	10	2	1	4	C4	square
4413	Pt2	Pt	78	10	2	1	4	C4	square
6083	V1	V	23	5	3	1	7	C7	pentagonal bipyramid
6084	Cr1	Cr	24	6	3	1	6	C6	octahedron
6085	Li1	Li	3	1	1	1	0	N6	octahedron
6085	Cr1	Cr	24	6	3	1	6	C6	octahedron
6086	Mg1	Mg	12	2	2	1	0	N6	octahedron
6086	Fe1	Fe	26	8	2	1	6	C6	octahedron
6088	Mn1	Mn	25	7	2	1	6	C6	octahedron
6093	Pd1	Pd	46	10	4	1	6	C6	octahedron
6093	Cd1	Cd	48	12	2	1	6	N6	octahedron
8248	Fe1	Fe	26	8	2	1	6	C6	octahedron
8248	Zn1	Zn	30	12	2	1	4	N4	tetrahedron
9032	Li1	Li	3	1	1	1	0	N6	octahedron
9032	Ir1	Ir	77	9	3	1	6	C6	octahedron
9035	Fe1	Fe	26	8	2	1	6	C6	octahedron
9476	Co1	Co	27	9	2	1	6	C5Co	octahedron
9477	Co1	Co	27	9	2	1	6	C5Co	octahedron
10099	Pt1	Pt	78	10	2	1	4	C4	square
10099	Pt2	Pt	78	10	2	1	4	C4	square
10180	Li1	Li	3	1	1	1	0	N6	octahedron
10180	Mn1	Mn	25	7	3	1	6	C6	octahedron
10181	Li1	Li	3	1	1	1	0	N6	octahedron
10181	Co1	Co	27	9	3	1	6	C6	octahedron
14042	Co1	Co	27	9	3	1	6	C6	octahedron
14259	W1	W	74	6	4	1	8	C8	square antiprism
14368	Zn1	Zn	30	12	2	1	4	C4	tetrahedron
15000	Ni1	Ni	28	10	2	1	4	C4	square
15002	Ni1	Ni	28	10	2	1	4	C4	square
15250	Cr1	Cr	24	6	3	1	6	C6	octahedron
15250	Cr2	Cr	24	6	3	1	6	C6	octahedron
15256	Fe1	Fe	26	8	3	1	6	C6	octahedron
15817	Fe1	Fe	26	8	2	1	6	C6	octahedron
16012	Pd1	Pd	46	10	2	1	4	C4	square
16043	Au1	Au	79	11	3	1	4	C4	square
16053	W1	W	74	6	5	1	8	C8	square antiprism
16224	Ni1	Ni	28	10	1	1	4	C3Ni	square
16224	Ni2	Ni	28	10	1	1	4	C3Ni	square
16224	Ni3	Ni	28	10	1	1	4	C3Ni	square
16224	Ni4	Ni	28	10	1	1	4	C3Ni	square
16399	Ni1	Ni	28	10	2	1	4	C4	square
16399	Ni2	Ni	28	10	2	1	4	C4	square
16458	Nb1	Nb	41	5	3	1	8	C8	trigonal dodecahedron
16958	Co1	Co	27	9	3	1	6	C6	octahedron
16959	Co1	Co	27	9	3	1	6	C6	octahedron
16959	Ag1	Ag	47	11	1	1	2	N2	linear
20747	Au1	Au	79	11	1	1	2	C2	linear
20784	Ru1	Ru	44	8	2	1	6	C6	octahedron
22316	Pd1	Pd	46	10	2	1	4	C4	square
22326	V1	V	23	5	1	1	6	C6	octahedron
23027	Fe1	Fe	26	8	2	1	6	C6	trigonal prism
23027	Zn1	Zn	30	12	2	1	6	N6	trigonal prism
23309	Mo1	Mo	42	6	5	1	8	C8	square antiprism
23767	Fe1	Fe	26	8	2	1	6	C6	octahedron
23888	Cu1	Cu	29	11	1	1	3	C2N	triangular
23888	Cu2	Cu	29	11	1	1	3	CN2	triangular
24099	Ni1	Ni	28	10	2	1	4	C4	square
24933	Mn1	Mn	25	7	3	1	6	C6	octahedron
25032	W1	W	74	6	4	1	8	C8	square antiprism
26498	Au1	Au	79	11	1	1	2	C2	linear
26922	Pd1	Pd	46	10	2	1	4	C4	square
26991	Au1	Au	79	11	3	1	4	C4	square
27217	Fe1	Fe	26	8	2	1	6	C6	octahedron
27217	Zn1	Zn	30	12	2	1	4	N4	tetrahedron
27438	Pt1	Pt	78	10	2	1	4	C4	square
27438	Pt2	Pt	78	10	2	1	4	C4	square
27566	Pt1	Pt	78	10	2	1	4	C4	square
27566	Pt2	Pt	78	10	2	1	4	C4	square
27566	Pt3	Pt	78	10	2	1	4	C4	square
27770	Pt1	Pt	78	10	2	1	4	C4	square
27923	Cu1	Cu	29	11	1	1	4	C3N	tetrahedron
28032	Ni1	Ni	28	10	1	1	4	C3Ni	square
28032	Ni2	Ni	28	10	1	1	4	C3Ni	square
28125	Mo1	Mo	42	6	4	1	8	C8	trigonal dodecahedron
28173	Pt1	Pt	78	10	2	1	4	C4	square
28173	Pt2	Pt	78	10	2	1	4	C4	square
28174	Pt1	Pt	78	10	2	1	4	C4	square
28174	Pt2	Pt	78	10	2	1	4	C4	square
28497	Li1	Li	3	1	1	1	0	N6	octahedron
28497	Cr1	Cr	24	6	3	1	6	C6	octahedron
28502	Co1	Co	27	9	3	1	6	C6	octahedron
28653	Fe1	Fe	26	8	2	1	6	C6	octahedron
28653	Cu1	Cu	29	11	2	1	6	N6	octahedron
28653	Cu2	Cu	29	11	2	1	0	C12N12	cuboctahedron
28654	Fe1	Fe	26	8	2	1	6	C6	octahedron
28654	Cu1	Cu	29	11	2	1	6	N6	octahedron
28655	Cu2	Cu	29	11	1	0.5	0	C12N12	cuboctahedron
28655	Cu3	Cu	29	11	1	0.5	0	C12N12	cuboctahedron
28655	Fe1	Fe	26	8	2	1	6	C6	octahedron
28655	Cu1	Cu	29	11	2	1	6	N6	octahedron
28657	Fe1	Fe	26	8	2	1	6	C6	octahedron
28657	Cu1	Cu	29	11	2	1	6	N6	octahedron
28658	Fe1	Fe	26	8	2	1	6	C6	octahedron
28658	Cu1	Cu	29	11	2	1	6	N6	octahedron
28659	Fe1	Fe	26	8	2	1	6	C6	octahedron
28659	Cu1	Cu	29	11	2	1	6	N6	octahedron
28667	Fe1	Fe	26	8	2	1	6	C6	octahedron
28667	Ni1	Ni	28	10	2	1	6	N6	octahedron
28668	Fe1	Fe	26	8	2	1	6	C6	octahedron
28668	Ni1	Ni	28	10	2	1	6	N6	octahedron
28668	Ni2	Ni	28	10	2	1	0	C12N12	cuboctahedron
28669	Fe1	Fe	26	8	2	1	6	C6	octahedron
28669	Co1	Co	27	9	2	1	6	N6	octahedron
28670	Fe1	Fe	26	8	2	1	6	C6	octahedron
28670	Co1	Co	27	9	2	1	6	N6	octahedron
28670	Co2	Co	27	9	2	1	0	C12N12	cuboctahedron
30275	Ag1	Ag	47	11	1	1	2	C2	linear
30513	Fe1	Fe	26	8	2	1	6	C6	octahedron
36070	Cu1	Cu	29	11	1	1	4	C4	tetrahedron
38045	Fe1	Fe	26	8	2	1	6	C6	octahedron
38045	Zn1	Zn	30	12	2	1	4	N4	tetrahedron
41197	Co1	Co	27	9	2	1	4	N4	tetrahedron
41197	Au1	Au	79	11	1	1	2	C2	linear
44400	Mn1	Mn	25	7	2	1	6	N6	octahedron
44400	Mn2	Mn	25	7	2	0.5	0	C12N12	cuboctahedron
44400	Co1	Co	27	9	3	1	6	C6	octahedron
44401	Fe1	Fe	26	8	2	1	6	N6	octahedron
44401	Fe2	Fe	26	8	2	0.5	0	C12N12	cuboctahedron
44401	Co1	Co	27	9	3	1	6	C6	octahedron
44402	Co1	Co	27	9	3	1	6	C6	octahedron
44402	Co2	Co	27	9	2	1	6	N6	octahedron
44402	Co3	Co	27	9	2	0.5	0	C12N12	cuboctahedron
44403	Co1	Co	27	9	3	1	6	C6	octahedron
44403	Ni1	Ni	28	10	2	1	6	N6	octahedron
44403	Ni2	Ni	28	10	2	0.5	0	C12N12	cuboctahedron
44404	Co1	Co	27	9	3	1	6	C6	octahedron
44404	Zn1	Zn	30	12	2	1	6	N6	octahedron
44404	Zn2	Zn	30	12	2	0.5	0	C12N12	cuboctahedron
44405	Co1	Co	27	9	3	1	6	C6	octahedron
44405	Cd1	Cd	48	12	2	1	6	N6	octahedron
44405	Cd2	Cd	48	12	2	0.5	0	C12N12	cuboctahedron
45114	Mn1	Mn	25	7	2	1	6	N6	octahedron
45114	Mn2	Mn	25	7	2	0.25	0	C12N12	cuboctahedron
45114	Co1	Co	27	9	3	1	6	C6	octahedron
45154	Co1	Co	27	9	2	0.25	0	C12N12	cuboctahedron
45154	Co2	Co	27	9	2	1	6	C6	octahedron
45154	Co3	Co	27	9	3	1	6	N6	octahedron
45540	Mn1	Mn	25	7	2	1	6	N6	octahedron
45540	Mn2	Mn	25	7	2	0.5	0	C12N12	cuboctahedron
45540	Rh1	Rh	45	9	3	1	6	C6	octahedron
45541	Fe1	Fe	26	8	2	1	6	N6	octahedron
45541	Fe2	Fe	26	8	2	0.5	0	C12N12	cuboctahedron
45541	Rh1	Rh	45	9	3	1	6	C6	octahedron
45542	Co1	Co	27	9	2	1	6	N6	octahedron
45542	Co2	Co	27	9	2	0.5	0	C12N12	cuboctahedron
45542	Rh1	Rh	45	9	3	1	6	C6	octahedron
45543	Ni1	Ni	28	10	2	1	6	N6	octahedron
45543	Ni2	Ni	28	10	2	0.5	0	C12N12	cuboctahedron
45543	Rh1	Rh	45	9	3	1	6	C6	octahedron
45544	Cu1	Cu	29	11	2	1	6	N6	octahedron
45544	Cu2	Cu	29	11	2	0.5	0	C12N12	cuboctahedron
45544	Rh1	Rh	45	9	3	1	6	C6	octahedron
45545	Zn1	Zn	30	12	2	1	6	N6	octahedron
45545	Zn2	Zn	30	12	2	0.5	0	C12N12	cuboctahedron
45545	Rh1	Rh	45	9	3	1	6	C6	octahedron
45546	Rh1	Rh	45	9	3	1	6	C6	octahedron
45546	Cd1	Cd	48	12	2	1	6	N6	octahedron
45546	Cd2	Cd	48	12	2	0.5	0	C12N12	cuboctahedron
51493	Fe1	Fe	26	8	2	1	6	C6	octahedron
51493	Pb1	Pb	82	14	2	1	0	N6	octahedron
51494	Fe1	Fe	26	8	2	1	6	C6	octahedron
51494	Sn1	Sn	50	14	2	1	3	N3	triangular
53268	Co1	Co	27	9	3	1	6	C6	octahedron
53268	Co2	Co	27	9	3	1	6	C6	octahedron
54145	Cr1	Cr	24	6	3	1	6	C6	octahedron
54145	Mn1	Mn	25	7	2	1	6	N6	octahedron
56222	In1	In	49	13	3	1	6	C6	octahedron
56327	Cr1	Cr	24	6	3	1	6	C6	octahedron
56602	Cr1	Cr	24	6	3	1	6	C6	octahedron
56602	Mn1	Mn	25	7	2	1	6	N6	octahedron
56603	Cr1	Cr	24	6	3	1	6	C6	octahedron
56603	Ni1	Ni	28	10	2	1	6	N6	octahedron
59389	Fe1	Fe	26	8	2	1	6	C6	octahedron
59394	Co1	Co	27	9	3	1	6	C6	octahedron
59726	Ag1	Ag	47	11	1	1	2	C2	linear
59726	Ag2	Ag	47	11	1	1	2	C2	linear
59917	Co1	Co	27	9	3	1	6	C6	octahedron
60008	Au1	Au	79	11	1	1	2	C2	linear
60535	Fe1	Fe	26	8	3	1	6	C6	octahedron
60536	Fe1	Fe	26	8	3	1	6	C6	octahedron
60541	Li1	Li	3	1	1	1	0	N6	octahedron
60541	Fe1	Fe	26	8	3	1	6	C6	octahedron
61098	Ag1	Ag	47	11	1	1	2	C2	linear
61098	Ag2	Ag	47	11	1	1	2	C2	linear
61099	Ag1	Ag	47	11	1	1	2	C2	linear
61099	Ag2	Ag	47	11	1	1	2	C2	linear
62084	Hg1	Hg	80	12	2	1	4	C4	tetrahedron
62085	Hg1	Hg	80	12	2	1	4	C4	tetrahedron
62541	Cr1	Cr	24	6	3	1	6	C6	octahedron
65697	Ag1	Ag	47	11	1	1	2	C2	linear
65699	Ag1	Ag	47	11	1	1	2	C2	linear
66037	Au1	Au	79	11	1	1	2	C2	linear
66037	Au2	Au	79	11	1	1	2	C2	linear
66037	Au3	Au	79	11	1	1	2	C2	linear
66937	Zn1	Zn	30	12	2	1	4	C4	tetrahedron
66937	Zn2	Zn	30	12	2	1	4	N4	tetrahedron
66938	Cd1	Cd	48	12	2	1	4	C4	tetrahedron
66938	Cd2	Cd	48	12	2	1	4	N4	tetrahedron
67255	Mn1	Mn	25	7	3	1	6	C6	octahedron
68301	Zn1	Zn	30	12	2	1	4	C4	tetrahedron
68301	Zn2	Zn	30	12	2	1	4	C4	tetrahedron
68301	Zn3	Zn	30	12	2	1	4	C4	tetrahedron
68301	Tl1	Tl	81	13	1	1	0	N6	octahedron
68301	Tl2	Tl	81	13	1	1	0	N6	octahedron
70003	Pt1	Pt	78	10	2	1	4	C4	square
70003	Pt2	Pt	78	10	2	1	4	C4	square
71612	Mo1	Mo	42	6	4	1	8	C8	square antiprism
71612	Tl1	Tl	81	13	1	1	0	-	polyhedron
71612	Tl2	Tl	81	13	1	1	0	-	polyhedron
71612	Tl3	Tl	81	13	1	1	0	-	polyhedron
71612	Tl4	Tl	81	13	1	1	0	-	polyhedron
73099	Fe1	Fe	26	8	2	1	6	C6	octahedron
73099	Tl1	Tl	81	13	1	1	0	N6	octahedron
73099	Tl2	Tl	81	13	1	1	0	-	polyhedron
73099	Tl3	Tl	81	13	1	1	0	-	polyhedron
73099	Tl4	Tl	81	13	1	1	0	N6	octahedron
73283	Ag1	Ag	47	11	1	1	2	C2	linear
73283	Ag2	Ag	47	11	1	1	2	C2	linear
73283	Ag3	Ag	47	11	1	1	2	C2	linear
73283	Ag4	Ag	47	11	1	1	2	C2	linear
74061	Cu1	Cu	29	11	1	1	4	C4	tetrahedron
74061	Cd1	Cd	48	12	2	1	6	N6	octahedron
75503	Ag1	Ag	47	11	1	1	2	C2	linear
75503	Cd1	Cd	48	12	2	1	6	N6	octahedron
76973	Fe1	Fe	26	8	2	1	6	C6	octahedron
77321	Li1	Li	3	1	1	1	4	CN3	tetrahedron
77338	Pt1	Pt	78	10	2	1	4	C4	square
77338	Pt2	Pt	78	10	2	1	4	C4	square
77339	Fe1	Fe	26	8	3	1	6	C6	octahedron
77339	Cd1	Cd	48	12	2	1	6	N6	octahedron
77339	Cd2	Cd	48	12	2	0.25	0	C12N12	cuboctahedron
77340	Fe1	Fe	26	8	2	1	6	C6	octahedron
77340	Fe2	Fe	26	8	3	1	6	N6	octahedron
77340	Fe3	Fe	26	8	3	0.167	0	C12N12	cuboctahedron
77380	Ni1	Ni	28	10	2	1	4	C4	square
77380	Ni2	Ni	28	10	2	1	4	C4	square
77916	Fe1	Fe	26	8	3	1	6	C6	octahedron
77916	Cu1	Cu	29	11	2	1	6	N6	octahedron
77916	Cu2	Cu	29	11	2	0.063	0	-	polyhedron
78447	Ni2	Ni	28	10	-2	0.5	0	C12N12	cuboctahedron
78447	Fe1	Fe	26	8	3	1	6	C6	octahedron
78447	Ni1	Ni	28	10	2	1	6	N6	octahedron
78448	Co2	Co	27	9	-2	0.5	0	C12N12	cuboctahedron
78448	Fe1	Fe	26	8	3	1	6	C6	octahedron
78448	Co1	Co	27	9	2	1	6	N6	octahedron
79722	Fe1	Fe	26	8	3	1	6	C6	octahedron
81197	Fe1	Fe	26	8	2	1	6	C6	octahedron
81197	Cu1	Cu	29	11	2	0.7	0	C12N12	cuboctahedron
81197	Cu2	Cu	29	11	2	1	6	N6	octahedron
81198	Fe1	Fe	26	8	2	1	6	C6	octahedron
81198	Ni1	Ni	28	10	2	0.81	0	C12N12	cuboctahedron
81198	Ni2	Ni	28	10	2	1	6	N6	octahedron
81210	Fe1	Fe	26	8	2	1	6	C6	octahedron
81210	Cu1	Cu	29	11	2	1	4	N4	square
83392	Li1	Li	3	1	1	1	0	N6	octahedron
83392	Fe1	Fe	26	8	3	1	6	C6	octahedron
83393	Li1	Li	3	1	1	1	0	N6	octahedron
83393	Co1	Co	27	9	3	1	6	C6	octahedron
83394	Fe1	Fe	26	8	3	1	6	C6	octahedron
83396	Co1	Co	27	9	3	1	6	C6	octahedron
83416	Cu1	Cu	29	11	1	1	3	CN2	triangular
83416	Cu2	Cu	29	11	1	1	3	C2N	triangular
84969	Ga1	Ga	31	13	3	1	6	C6	octahedron
85757	Ag1	Ag	47	11	1	1	2	C2	linear
85757	Ag2	Ag	47	11	1	1	2	C2	linear
85757	Ag3	Ag	47	11	1	1	2	C2	linear
85757	Tl1	Tl	81	13	1	1	0	-	polyhedron
85757	Tl2	Tl	81	13	1	1	0	-	polyhedron
85782	Au1	Au	79	11	1	1	2	CN	linear
85783	Ag1	Ag	47	11	1	1	2	CN	linear
87573	W1	W	74	6	4	1	8	C8	trigonal dodecahedron
87574	W1	W	74	6	4	1	8	C8	square antiprism
89338	Fe1	Fe	26	8	3	1	6	C6	octahedron
89338	Ni1	Ni	28	10	2	1	6	N6	octahedron
89339	Mn1	Mn	25	7	2	1	6	N6	octahedron
89339	Mn2	Mn	25	7	2	1	6	N6	octahedron
89339	Fe1	Fe	26	8	3	1	6	C6	octahedron
89339	Fe2	Fe	26	8	3	1	6	C6	octahedron
91841	Mn1	Mn	25	7	2	1	6	N6	octahedron
91841	Mn2	Mn	25	7	2	1	6	N6	octahedron
91841	Mn3	Mn	25	7	2	0.5	0	C12N12	cuboctahedron
91841	Fe1	Fe	26	8	3	1	6	C6	octahedron
91841	Fe2	Fe	26	8	3	1	6	C6	octahedron
93725	Be1	Be	4	2	2	1	4	C4	tetrahedron
93726	Mg1	Mg	12	2	2	1	4	C4	tetrahedron
93727	Al1	Al	13	3	3	1	6	C6	octahedron
94868	Cu1	Cu	29	11	1	1	2	C2	linear
99499	Fe1	Fe	26	8	2	1	6	C6	octahedron
99499	Cu1	Cu	29	11	2	1	4	N4	square
100326	Zn1	Zn	30	12	2	1	4	C4	tetrahedron
100406	Zn1	Zn	30	12	2	1	4	C4	tetrahedron
100406	Zn2	Zn	30	12	2	1	4	C4	tetrahedron
100684	Hg1	Hg	80	12	2	1	4	C4	tetrahedron
104000	V1	V	23	5	3	1	7	C7	pentagonal bipyramid
107673	Cd1	Cd	48	12	2	1	6	N6	octahedron
107673	Cd2	Cd	48	12	2	1	4	C4	tetrahedron
107673	Cd3	Cd	48	12	2	1	4	C4	tetrahedron
109706	Cu1	Cu	29	11	1	1	4	C4	tetrahedron
109706	Zn1	Zn	30	12	2	1	4	N4	tetrahedron
151546	Co1	Co	27	9	3	0.7	6	C6	octahedron
151546	Fe1	Fe	26	8	3	0.7	6	C6	octahedron
151546	Cu1	Cu	29	11	2	1	6	N6	octahedron
151548	Fe1	Fe	26	8	3	1	6	N6	octahedron
151548	Fe2	Fe	26	8	3	0.8	6	C6	octahedron
151548	Co1	Co	27	9	3	0.8	6	C6	octahedron
151695	Mn1	Mn	25	7	2	1	6	N6	octahedron
151695	Fe1	Fe	26	8	2	1	6	C6	octahedron
151696	Fe1	Fe	26	8	2	1	6	C6	octahedron
151696	Cd1	Cd	48	12	2	1	6	N6	octahedron
151697	Mn1	Mn	25	7	2	1	6	N6	octahedron
151697	Fe1	Fe	26	8	2	1	6	C6	octahedron
151698	Fe1	Fe	26	8	2	1	6	C6	octahedron
151698	Cd1	Cd	48	12	2	1	6	N6	octahedron
151706	Fe1	Fe	26	8	2	1	6	C6	octahedron
151706	Ni1	Ni	28	10	2	1	6	N6	octahedron
151707	Fe1	Fe	26	8	2	1	6	C6	octahedron
151707	Ni1	Ni	28	10	2	1	6	N6	octahedron
151708	Fe1	Fe	26	8	2	1	6	C6	octahedron
151708	Ni1	Ni	28	10	2	1	6	N6	octahedron
153672	Fe1	Fe	26	8	3	1	6	N6	octahedron
153672	Fe2	Fe	26	8	3	1	6	C6	octahedron
155196	Mo1	Mo	42	6	4	1	8	C8	trigonal dodecahedron
157486	Fe1	Fe	26	8	3	1	6	C6	octahedron
157486	Co1	Co	27	9	2	1	6	N6	octahedron
157850	Fe1	Fe	26	8	3	1	6	C6	octahedron
157850	Zn1	Zn	30	12	2	1	4	N4	tetrahedron
157851	Fe1	Fe	26	8	2	1	6	C6	octahedron
157851	Zn1	Zn	30	12	2	1	4	N4	tetrahedron
157852	Fe1	Fe	26	8	2	1	6	C6	octahedron
157852	Zn1	Zn	30	12	2	1	4	N4	tetrahedron
161414	Zn1	Zn	30	12	2	1	4	N4	tetrahedron
161414	Au1	Au	79	11	1	1	2	C2	linear
165174	Au1	Au	79	11	1	1	2	C2	linear
165379	Au1	Au	79	11	1	1	2	C2	linear
165379	Au2	Au	79	11	1	1	2	C2	linear
165379	Au3	Au	79	11	1	1	2	C2	linear
165379	Tl1	Tl	81	13	1	1	0	-	polyhedron
165379	Tl2	Tl	81	13	1	1	0	-	polyhedron
167115	Cr1	Cr	24	6	3	1	6	C6	octahedron
168524	Cd1	Cd	48	12	2	1	4	C4	tetrahedron
170125	Tl1	Tl	81	13	3	1	4	C4	tetrahedron
170126	Tl1	Tl	81	13	3	1	4	C4	tetrahedron
170329	Cr1	Cr	24	6	3	1	6	C6	octahedron
170329	Mn1	Mn	25	7	2	1	6	N6	octahedron
171260	Pt1	Pt	78	10	2	1	4	C4	square
171260	Hg1	Hg	80	12	2	1	2	C2	linear
171261	Pd1	Pd	46	10	2	1	4	C4	square
171261	Hg1	Hg	80	12	2	1	2	C2	linear
171262	Ni1	Ni	28	10	2	1	4	C4	square
171262	Hg1	Hg	80	12	2	1	2	C2	linear
171492	Pt1	Pt	78	10	2	1	4	C4	square
171615	Co1	Co	27	9	3	1	6	C6	octahedron
171615	Er1	Er	68	0	3	1	6	N6	trigonal prism
172539	Mn1	Mn	25	7	2	0.5	6	C6	octahedron
172539	Fe1	Fe	26	8	2	0.5	6	C6	octahedron
172563	Cu1	Cu	29	11	1	1	3	CN2	triangular
172563	Cu2	Cu	29	11	1	1	3	C2N	triangular
173041	Cr1	Cr	24	6	3	0.8	6	C6	octahedron
173041	Mn2	Mn	25	7	3	0.8	6	C6	octahedron
173041	Mn1	Mn	25	7	3	1	6	N6	octahedron
173553	Fe1	Fe	26	8	3	1	6	C6	octahedron
173553	Ag1	Ag	47	11	1	1	2	N2	linear
173555	Co1	Co	27	9	3	1	6	C6	octahedron
180375	Cu1	Cu	29	11	1	1	4	C4	tetrahedron
180375	Zn1	Zn	30	12	2	1	4	N4	tetrahedron
181373	Pt1	Pt	78	10	2	1	4	C4	square
181373	Pt2	Pt	78	10	2	1	4	C4	square
181373	Pt3	Pt	78	10	2	1	4	C4	square
181373	Pt4	Pt	78	10	2	1	4	C4	square
182316	Rh1	Rh	45	9	3	1	6	C6	octahedron
182335	W1	W	74	6	4	1	8	C8	trigonal dodecahedron
200037	Mo1	Mo	42	6	2	1	7	C7	pentagonal bipyramid
200038	Mo1	Mo	42	6	2	1	7	C7	pentagonal bipyramid
200201	Fe1	Fe	26	8	3	1	6	C6	octahedron
200458	Nb1	Nb	41	5	4	1	8	C8	trigonal dodecahedron
201056	Co1	Co	27	9	2	1	6	N6	octahedron
201056	Au1	Au	79	11	1	1	2	C2	linear
201181	Fe1	Fe	26	8	2	1	6	C6	octahedron
201181	Cu1	Cu	29	11	2	1	6	N6	octahedron
201181	Cu2	Cu	29	11	2	0.38	0	C12N12	cuboctahedron
201201	Re1	Re	75	7	3	1	7	C7	pentagonal bipyramid
202570	Pt1	Pt	78	10	2	1	4	C4	square
202570	Tl1	Tl	81	13	1	1	0	-	polyhedron
240225	Cr1	Cr	24	6	3	1	6	C6	octahedron
248018	Mo1	Mo	42	6	3	1	7	C7	single-cap trigonal prism
248044	Mn1	Mn	25	7	2	1	6	C6	octahedron
248044	Mn2	Mn	25	7	2	1	6	N6	octahedron
248045	Mn1	Mn	25	7	2	1	6	C6	octahedron
248045	Mn2	Mn	25	7	2	1	6	N6	octahedron
248046	Mn1	Mn	25	7	2	1	6	N6	octahedron
248046	Mn2	Mn	25	7	2	1	6	C6	octahedron
249564	Ni1	Ni	28	10	2	1	4	C4	square
249564	Tl1	Tl	81	13	1	1	0	-	polyhedron
249565	Pd1	Pd	46	10	2	1	4	C4	square
249565	Tl1	Tl	81	13	1	1	0	-	polyhedron
249724	Ni1	Ni	28	10	2	1	6	N6	octahedron
249724	Au1	Au	79	11	1	1	2	C2	linear
260301	Fe1	Fe	26	8	2	1	6	C6	octahedron
260302	Fe1	Fe	26	8	2	1	6	C6	octahedron
260354	Zn1	Zn	30	12	2	1	4	N4	tetrahedron
260354	Au1	Au	79	11	1	1	2	C2	linear
260357	Ag7	Ag	47	11	1	0.1	2	C2	linear
260357	Ag6	Ag	47	11	1	0.1	2	C2	linear
260357	Ag5	Ag	47	11	1	0.1	2	C2	linear
260357	Ag4	Ag	47	11	1	0.1	2	C2	linear
260357	Ag3	Ag	47	11	1	0.1	2	C2	linear
260357	Ag2	Ag	47	11	1	0.1	2	C2	linear
260357	Zn1	Zn	30	12	2	1	4	N4	tetrahedron
260357	Ag1	Ag	47	11	1	1	2	C2	linear
260896	Pt1	Pt	78	10	2	1	4	C4	square
261195	Pd1	Pd	46	10	2	1	4	C4	square
261197	Pt1	Pt	78	10	2	1	4	C4	square
262446	Mn1	Mn	25	7	2	0.001	4	C4	tetrahedron
262657	Co1	Co	27	9	3	1	6	C6	octahedron
262657	Cu1	Cu	29	11	2	1	6	N6	octahedron
262657	Cu2	Cu	29	11	2	0.25	0	C12N12	cuboctahedron
262659	Mn1	Mn	25	7	2	1	6	N6	octahedron
262659	Mn2	Mn	25	7	2	0.5	0	C12N12	cuboctahedron
262659	Fe1	Fe	26	8	3	1	6	C6	octahedron
262660	Fe1	Fe	26	8	3	1	6	N6	octahedron
262660	Fe2	Fe	26	8	2	1	6	C6	octahedron
262660	Fe3	Fe	26	8	2	0.25	0	C12N12	cuboctahedron
262661	Fe1	Fe	26	8	3	1	6	C6	octahedron
262661	Co1	Co	27	9	2	1	6	N6	octahedron
262661	Co2	Co	27	9	2	0.5	0	C12N12	cuboctahedron
262662	Fe1	Fe	26	8	3	1	6	C6	octahedron
262662	Ni1	Ni	28	10	2	1	6	N6	octahedron
262662	Ni2	Ni	28	10	2	0.5	0	C12N12	cuboctahedron
262663	Fe1	Fe	26	8	3	1	6	N6	octahedron
262663	Cu1	Cu	29	11	2	1	6	C6	octahedron
262663	Cu2	Cu	29	11	2	0.25	0	C12N12	cuboctahedron
262664	Fe1	Fe	26	8	3	1	6	N6	octahedron
262664	Zn1	Zn	30	12	2	1	6	C6	octahedron
262664	Zn2	Zn	30	12	2	0.25	0	C12N12	cuboctahedron
262668	Fe1	Fe	26	8	2	1	6	C6	octahedron
262668	Zn1	Zn	30	12	2	1	3	N3	triangular
280324	Mn1	Mn	25	7	3	1	6	C6	octahedron
280482	Ni1	Ni	28	10	2	1	4	C4	square
280482	Ni2	Ni	28	10	2	1	4	C4	square
281065	Co1	Co	27	9	3	0.7	6	C6	octahedron
281065	Fe1	Fe	26	8	3	0.7	6	C6	octahedron
281065	Cu1	Cu	29	11	2	1	6	N6	octahedron
281066	Co1	Co	27	9	3	0.7	6	C6	octahedron
281066	Fe1	Fe	26	8	3	0.7	6	C6	octahedron
281066	Ni1	Ni	28	10	2	1	6	N6	octahedron
281280	Mn1	Mn	25	7	2	1	6	N6	octahedron
281280	Ag1	Ag	47	11	1	1	2	C2	linear
281414	Ni1	Ni	28	10	2	1	4	C4	square
281477	Ni1	Ni	28	10	2	1	4	C4	square
281477	Ni2	Ni	28	10	2	1	4	C4	square
281477	Ni3	Ni	28	10	2	1	4	C4	square
281478	Ni1	Ni	28	10	2	1	4	C4	square
281478	Ni2	Ni	28	10	2	1	4	C4	square
281775	Cu1	Cu	29	11	1	1	3	C2N	triangular
281775	Cu2	Cu	29	11	1	1	3	CN2	triangular
281776	Cu1	Cu	29	11	1	1	3	CN2	triangular
281776	Cu2	Cu	29	11	1	1	3	C2N	triangular
391243	Cu1	Cu	29	11	1	1	2	C2	linear
391243	Cu2	Cu	29	11	1	1	2	CN	linear
391243	Cu3	Cu	29	11	1	1	2	CN	linear
391243	Cu4	Cu	29	11	1	1	2	CN	linear
391243	Cu5	Cu	29	11	1	1	2	CN	linear
408836	Mo1	Mo	42	6	4	1	8	C8	square antiprism
409861	Pt1	Pt	78	10	2	1	4	C4	square
411119	Cr1	Cr	24	6	3	1	6	C6	octahedron
411120	Cr1	Cr	24	6	3	1	6	C6	octahedron
411121	Mn1	Mn	25	7	3	1	6	C6	octahedron
411122	Fe1	Fe	26	8	3	1	6	C6	octahedron
411123	Fe1	Fe	26	8	3	1	6	C6	octahedron
411125	Fe1	Fe	26	8	3	1	6	C6	octahedron
411126	Co1	Co	27	9	3	1	6	C6	octahedron
411127	Co1	Co	27	9	3	1	6	C6	octahedron
411128	Co1	Co	27	9	3	1	6	C6	octahedron
412315	Hg1	Hg	80	12	2	1	2	C2	linear
412417	Ag1	Ag	47	11	1	1	2	C2	linear
413098	Zn1	Zn	30	12	2	1	4	C4	tetrahedron
413108	Cd1	Cd	48	12	2	1	4	C4	tetrahedron
413110	Zn1	Zn	30	12	2	0.8	4	C4	tetrahedron
413110	Cd1	Cd	48	12	2	0.8	4	C4	tetrahedron
413898	Pt1	Pt	78	10	2	1	4	C4	square
413899	Pd1	Pd	46	10	2	1	4	C4	square
413900	Pd1	Pd	46	10	2	1	4	C4	square
413901	Pt1	Pt	78	10	2	1	4	C4	square
414602	Ag1	Ag	47	11	1	1	2	C2	linear
415570	Cu1	Cu	29	11	1	1	4	N4	tetrahedron
415570	Ag1	Ag	47	11	1	1	2	C2	linear
415570	Ag2	Ag	47	11	1	1	2	C2	linear
415571	Cu1	Cu	29	11	1	1	4	N4	tetrahedron
415571	Ag1	Ag	47	11	1	1	2	C2	linear
415571	Ag2	Ag	47	11	1	1	2	C2	linear
415572	Cu1	Cu	29	11	1	1	4	N4	tetrahedron
415572	Ag1	Ag	47	11	1	1	2	C2	linear
415572	Ag2	Ag	47	11	1	1	2	C2	linear
415573	Cu1	Cu	29	11	1	1	4	C2N2	tetrahedron
415573	Cu2	Cu	29	11	1	1	4	CN3	tetrahedron
415573	Ag1	Ag	47	11	1	1	2	C2	linear
415573	Ag2	Ag	47	11	1	1	2	C2	linear
415573	Ag3	Ag	47	11	1	1	2	C2	linear
415574	Cu1	Cu	29	11	1	1	4	C2N2	tetrahedron
415574	Cu2	Cu	29	11	1	1	4	CN3	tetrahedron
415574	Ag1	Ag	47	11	1	1	2	C2	linear
415574	Ag2	Ag	47	11	1	1	2	C2	linear
415574	Ag3	Ag	47	11	1	1	2	C2	linear
415769	Cu1	Cu	29	11	1	1	3	CN2	triangular
415769	Cu2	Cu	29	11	1	1	3	C2N	triangular
415770	Cu1	Cu	29	11	1	1	3	CN2	triangular
415770	Cu2	Cu	29	11	1	1	3	C2N	triangular
415771	Cu1	Cu	29	11	1	1	2	C2	linear
415771	Cu2	Cu	29	11	1	1	3	C2N	triangular
415771	Cu3	Cu	29	11	1	1	3	CN2	triangular
415772	Cu1	Cu	29	11	1	1	4	C2N2	tetrahedron
415772	Cu2	Cu	29	11	1	1	4	N4	tetrahedron
415772	Cu3	Cu	29	11	1	1	2	C2	linear
415772	Cu4	Cu	29	11	1	1	2	CN	linear
415772	Cu5	Cu	29	11	1	1	2	C2	linear
416740	Co1	Co	27	9	3	1	6	C6	octahedron
416740	Zn1	Zn	30	12	2	1	4	N4	tetrahedron
417330	Fe1	Fe	26	8	3	1	6	C6	octahedron
417821	Cd1	Cd	48	12	2	1	6	N6	octahedron
417821	Os1	Os	76	8	2	1	6	C6	octahedron
417822	Ru1	Ru	44	8	2	1	6	C6	octahedron
417822	Cd1	Cd	48	12	2	1	6	N6	octahedron
417824	Mn1	Mn	25	7	2	1	6	N6	octahedron
417824	Fe1	Fe	26	8	2	1	6	C6	octahedron
418911	Pt1	Pt	78	10	2	1	4	C4	square
418912	Pt1	Pt	78	10	2	1	4	C4	square
418913	Pt1	Pt	78	10	2	1	4	C4	square
423299	Co1	Co	27	9	-1	1	3	C3	triangular
423302	Co1	Co	27	9	-1	1	3	C3	triangular
424762	Ir1	Ir	77	9	-1	1	3	C3	triangular
ACIKEE	Mo1	Mo	42	6	4	1	8	C8	square antiprism
ACIKII	W1	W	74	6	5	1	8	C8	square antiprism
ACIKOO	W1	W	74	6	5	1	8	C8	square antiprism
ACIKUU	W1	W	74	6	5	1	8	C8	square antiprism
AKAMOO	Fe1	Fe	26	8	3	1	6	C6	octahedron
AKAMUU	Fe1	Fe	26	8	3	1	6	C6	octahedron
AKAMUU	Fe2	Fe	26	8	3	1	6	C6	octahedron
AKANAB	Fe1	Fe	26	8	3	1	6	C6	octahedron
AKONOE	Cu1	Cu	29	11	1	1	2	C2	linear
AMUXUC	Ag1	Ag	47	11	1	1	2	C2	linear
AMUXUC01	Ag1	Ag	47	11	1	1	2	C2	linear
AMUXUC01	Ag2	Ag	47	11	1	1	2	C2	linear
AMUYAJ	Ag1	Ag	47	11	1	1	2	C2	linear
AMUYEN	Au1	Au	79	11	1	1	2	C2	linear
AMUYIR	Au1	Au	79	11	1	1	2	C2	linear
AMUYOX	Ag1	Ag	47	11	1	1	2	C2	linear
AMUYOX	Ag2	Ag	47	11	1	1	2	C2	linear
ANEGEG	Fe1	Fe	26	8	3	1	6	C6	octahedron
ANEGEG	Fe2	Fe	26	8	3	1	6	C6	octahedron
ANEGEG	Tl1	Tl	81	13	1	1	0	-	polyhedron
ANEGEG	Tl2	Tl	81	13	1	1	0	-	polyhedron
ANEGEG	Tl3	Tl	81	13	1	1	0	-	polyhedron
ANEGEG	Tl4	Tl	81	13	1	1	0	N6	octahedron
ANILPC	Pt1	Pt	78	10	2	1	4	C4	square
ASAZAW	Ag1	Ag	47	11	1	1	2	CN	linear
ASAZEA	Ag1	Ag	47	11	1	1	2	C2	linear
ASAZEA	Ag2	Ag	47	11	1	1	2	C2	linear
AWELUJ	Ni1	Ni	28	10	2	1	4	C4	square
AXODAT	Co1	Co	27	9	2	1	4	N4	tetrahedron
AXODAT	W1	W	74	6	4	1	8	C8	square antiprism
AXODEX	Co1	Co	27	9	2	1	4	N4	tetrahedron
AXODEX	W1	W	74	6	4	1	8	C8	square antiprism
BAPXUL	Zn1	Zn	30	12	2	1	4	C4	tetrahedron
BAQBIE	Au1	Au	79	11	1	1	2	C2	linear
BEMKEJ10	Ni1	Ni	28	10	2	1	4	C4	square
BEMKEJ10	Cd1	Cd	48	12	2	1	4	N4	tetrahedron
BIFZOG	Mn1	Mn	25	7	3	1	6	C6	octahedron
BIGFUT	Cu1	Cu	29	11	1	1	3	CN2	triangular
BIGFUT	Cu2	Cu	29	11	1	1	3	C2N	triangular
BIGGAA	Cu1	Cu	29	11	1	1	3	CN2	triangular
BIGGAA	Cu2	Cu	29	11	1	1	3	C2N	triangular
BIGGEE	Cu1	Cu	29	11	1	1	3	CN2	triangular
BIGGEE	Cu2	Cu	29	11	1	1	3	C2N	triangular
BIGGII	Cu1	Cu	29	11	1	1	4	CN3	tetrahedron
BIGGII	Cu2	Cu	29	11	1	1	4	C2N2	tetrahedron
BIGGII	Cu3	Cu	29	11	1	1	4	CN3	tetrahedron
BIGGII	Cu4	Cu	29	11	1	1	4	C4	tetrahedron
BIGGII	Cu5	Cu	29	11	1	1	4	C2N2	tetrahedron
BIGGII	Cu6	Cu	29	11	1	1	4	CN3	tetrahedron
BIGGII	Cu7	Cu	29	11	1	1	4	C4	tetrahedron
BIGGII	Cu8	Cu	29	11	1	1	4	C3N	tetrahedron
BOFROE	Mo1	Mo	42	6	5	1	8	C8	square antiprism
BUJKEW01	Fe1	Fe	26	8	3	1	6	C6	octahedron
BUJKOG10	Fe1	Fe	26	8	3	1	6	C6	octahedron
BUMJIC	Cu1	Cu	29	11	1	1	3	C3	triangular
BUMJIC	Cu2	Cu	29	11	1	1	3	C3	triangular
BUPJEC01	Fe1	Fe	26	8	2	1	6	C6	octahedron
BUTMOC	Mo1	Mo	42	6	5	1	8	C8	trigonal dodecahedron
BUXXEY	Fe1	Fe	26	8	3	1	6	C6	octahedron
CAQWAS	Ag1	Ag	47	11	1	1	2	C2	linear
CARGEI	Ag1	Ag	47	11	1	1	4	N4	tetrahedron
CARGEI	Ag2	Ag	47	11	1	1	4	N4	tetrahedron
CARGEI	Ag3	Ag	47	11	1	1	2	C2	linear
CARGEI	Ag4	Ag	47	11	1	1	2	C2	linear
CARGEI	Ag5	Ag	47	11	1	1	2	C2	linear
CEHTEP	Ag1	Ag	47	11	1	1	3	N3	triangular
CEHTEP	Ag2	Ag	47	11	1	1	3	C2N	triangular
CEHTEP	Ag3	Ag	47	11	1	1	2	C2	linear
CEHTEP	Ag4	Ag	47	11	1	1	2	C2	linear
CEXTUW	Cu1	Cu	29	11	1	1	3	C3	triangular
CEXTUW	Cu2	Cu	29	11	1	1	4	C4	tetrahedron
CEXTUW	Cu3	Cu	29	11	1	1	4	C3N	tetrahedron
CEXVAE	Cu1	Cu	29	11	1	1	3	C3	triangular
CEXVAE	Cu2	Cu	29	11	1	1	4	C4	tetrahedron
CEXVEI	Cu1	Cu	29	11	1	1	4	C3N	tetrahedron
CEXVIM	Cu1	Cu	29	11	1	1	4	C4	tetrahedron
CEXVOS	Cu1	Cu	29	11	1	1	3	C3	triangular
CEXVOS	Cu2	Cu	29	11	1	1	3	C3	triangular
CEXVOS	Cu3	Cu	29	11	1	1	2	C2	linear
CEXVUY	Cu1	Cu	29	11	1	1	3	C3	triangular
CEXVUY	Cu2	Cu	29	11	1	1	3	C3	triangular
CEXWAF	Cu1	Cu	29	11	1	1	3	C2N	triangular
CICWER	Fe1	Fe	26	8	3	1	6	C6	octahedron
CIKYUR	Au1	Au	79	11	3	1	4	C4	square
CIKZAY	Au1	Au	79	11	3	1	4	C4	square
CIWJOH01	Fe1	Fe	26	8	3	1	6	C6	octahedron
CIWJOH01	Fe2	Fe	26	8	3	1	6	C6	octahedron
CIWJOH10	Fe1	Fe	26	8	3	1	6	C6	octahedron
CIWJOH10	Fe2	Fe	26	8	3	1	6	C6	octahedron
CIXQEG	Au1	Au	79	11	1	1	2	C2	linear
CIXQEG	Au2	Au	79	11	1	1	2	C2	linear
CIYJEZ	Co1	Co	27	9	2	1	4	C4	square
CIYJEZ10	Co1	Co	27	9	2	1	4	C4	square
COVHEA	Hg1	Hg	80	12	2	1	4	C4	tetrahedron
COXCUN	Au1	Au	79	11	1	1	2	C2	linear
CSCNCA01	Cr1	Cr	24	6	3	1	6	C6	octahedron
CSCNCB10	Fe1	Fe	26	8	3	1	6	C6	octahedron
CSCNCC01	Co1	Co	27	9	3	1	6	C6	octahedron
CSCNCC02	Co1	Co	27	9	3	1	6	C6	octahedron
CUBSOI	Mo1	Mo	42	6	5	1	8	C8	square antiprism
CYHGTF	Hg1	Hg	80	12	2	1	2	C2	linear
CYHGTF	Hg2	Hg	80	12	2	1	2	C2	linear
CYHGTF	Hg3	Hg	80	12	2	1	2	C2	linear
DAQKUC	Fe1	Fe	26	8	3	1	6	C6	octahedron
DAQKUC	Fe2	Fe	26	8	3	1	6	C6	octahedron
DARNER	Au1	Au	79	11	1	1	2	C2	linear
DARNER	Au2	Au	79	11	1	1	2	C2	linear
DIRWAC	Ag1	Ag	47	11	1	1	2	C2	linear
DIRWAC	Ag2	Ag	47	11	1	1	3	N2C	triangular
DODPUI	Fe1	Fe	26	8	3	1	6	C6	octahedron
DONYUA	Au1	Au	79	11	3	1	4	C4	square
DOYSIT	Cr1	Cr	24	6	3	1	6	C6	octahedron
DUSBEY	Ag1	Ag	47	11	1	1	2	C2	linear
DUSBEY03	Ag1	Ag	47	11	1	1	2	C2	linear
DUSBEY04	Ag1	Ag	47	11	1	1	2	C2	linear
DUSBEY07	Ag1	Ag	47	11	1	1	2	C2	linear
DUSBEY08	Ag1	Ag	47	11	1	1	2	C2	linear
DUSBEY09	Ag1	Ag	47	11	1	1	2	C2	linear
DUSBEY11	Ag1	Ag	47	11	1	1	2	C2	linear
DUSBEY12	Ag1	Ag	47	11	1	1	2	C2	linear
DUSBIC	Au1	Au	79	11	1	1	2	C2	linear
DUSBIC02	Au1	Au	79	11	1	1	2	C2	linear
DUSTOA11	Li1	Li	3	1	1	1	4	N4	tetrahedron
DUSTOA11	Hg1	Hg	80	12	2	1	4	C4	tetrahedron
DUSVAO10	Hg1	Hg	80	12	2	1	4	C4	tetrahedron
DUXZIG	Ni1	Ni	28	10	2	1	4	C4	square
DUXZIG	Zn1	Zn	30	12	2	1	4	N4	tetrahedron
DUXZIG01	Ni1	Ni	28	10	2	1	4	C4	square
DUXZIG01	Zn1	Zn	30	12	2	1	4	N4	tetrahedron
DUXZOM	Zn1	Zn	30	12	2	1	4	N4	tetrahedron
DUXZOM	Pd1	Pd	46	10	2	1	4	C4	square
DUXZUS	Zn1	Zn	30	12	2	1	4	N4	tetrahedron
DUXZUS	Pt1	Pt	78	10	2	1	4	C4	square
EATCPD	Pd1	Pd	46	10	2	1	4	C4	square
EBEMEF	Ni1	Ni	28	10	2	1	4	C4	square
EBEMEF	Zn1	Zn	30	12	2	1	4	N4	tetrahedron
EDAPEG	Cu1	Cu	29	11	2	1	4	C4	tetrahedron
EDAPEG	Cu2	Cu	29	11	1	1	3	N3	triangular
EDECOG	Ni1	Ni	28	10	2	1	6	N6	octahedron
EDECOG	Au1	Au	79	11	1	1	2	C2	linear
EDECOG	Au2	Au	79	11	1	1	2	C2	linear
EDECOG	Au3	Au	79	11	1	1	2	C2	linear
EDEDAT	Ni1	Ni	28	10	2	1	6	N6	octahedron
EDEDAT	Au1	Au	79	11	1	1	2	C2	linear
EIPCYC10	Co1	Co	27	9	2	1	5	C5	square pyramid
ELAKAD01	Pd1	Pd	46	10	2	1	4	C4	square
EXONAH	Pt1	Pt	78	10	2	1	4	C4	square
EXONEL	Pt1	Pt	78	10	2	1	4	C4	square
EXONIP	Pt1	Pt	78	10	2	1	4	C4	square
EZOYIC	Mn1	Mn	25	7	2	1	4	C4	tetrahedron
FAZGET	Au1	Au	79	11	1	1	2	C2	linear
FAZGET	Au2	Au	79	11	1	1	2	C2	linear
FEJJIN	Co1	Co	27	9	3	1	6	C6	octahedron
FEJJIN	Co2	Co	27	9	3	1	6	C6	octahedron
FEZDIY	Cu1	Cu	29	11	1	1	3	C2N	triangular
FIRVOR	Co1	Co	27	9	3	1	6	C6	octahedron
FIRWAE	Co1	Co	27	9	3	1	6	C6	octahedron
FIRZUB	Co1	Co	27	9	3	1	6	C6	octahedron
FOCCIK	Pt1	Pt	78	10	2	1	4	C4	square
FUCPEY	Hg1	Hg	80	12	2	1	4	C4	tetrahedron
FULBAQ	Co1	Co	27	9	3	1	6	C6	octahedron
FULBEU	Fe1	Fe	26	8	3	1	6	C6	octahedron
GALMEL	Au1	Au	79	11	1	1	2	C2	linear
GAXDIS10	Cd1	Cd	48	12	2	1	6	N6	octahedron
GAXDIS10	Cd2	Cd	48	12	2	1	4	C4	tetrahedron
GAXDIS10	Cd3	Cd	48	12	2	1	4	C4	tetrahedron
GEFROZ	Au1	Au	79	11	3	1	4	C4	square
GEFROZ01	Au1	Au	79	11	3	1	4	C4	square
GEHSAN	Fe1	Fe	26	8	3	1	6	C6	octahedron
GEYHOJ	Ag1	Ag	47	11	1	1	2	C2	linear
GEZWUD	Fe1	Fe	26	8	3	1	6	C6	octahedron
GILLET	Co1	Co	27	9	3	1	6	C6	octahedron
GILLIX	Fe1	Fe	26	8	3	1	6	C6	octahedron
GIMDIP	Ni1	Ni	28	10	2	1	4	C4	square
GIQHOE	Ni1	Ni	28	10	2	1	4	C4	square
GIQHUK	Pd1	Pd	46	10	2	1	4	C4	square
GIQJAS	Pt1	Pt	78	10	2	1	4	C4	square
GIQJAS01	Pt1	Pt	78	10	2	1	4	C4	square
GIQJAS01	Pt2	Pt	78	10	2	1	4	C4	square
GOKZOV	Ag1	Ag	47	11	1	1	2	C2	linear
GOKZUB	Ag1	Ag	47	11	1	1	2	C2	linear
GOKZUB	Ag2	Ag	47	11	1	1	2	CN	linear
GORQAF	Cd1	Cd	48	12	2	1	4	N4	tetrahedron
GOWZOH	W1	W	74	6	4	1	8	C8	square antiprism
GOXCIF	Au1	Au	79	11	3	1	4	C4	square
GOXCOL	Au1	Au	79	11	3	1	4	C4	square
GUYPOG	Mn1	Mn	25	7	2	1	4	CN3	tetrahedron
GUYPOG	Mn2	Mn	25	7	2	1	6	C6	octahedron
HACBET	Fe1	Fe	26	8	3	1	6	C6	octahedron
HACBET	Fe2	Fe	26	8	3	1	6	C6	octahedron
HADYOB	Fe1	Fe	26	8	3	1	6	C6	octahedron
HADYOB	Fe2	Fe	26	8	3	1	6	C6	octahedron
HADYUH	Fe1	Fe	26	8	3	1	6	C6	octahedron
HAXNOJ	Cd1	Cd	48	12	2	1	6	N6	octahedron
HAXNOJ	Cd2	Cd	48	12	2	1	4	C4	tetrahedron
HAXNOJ	Cd3	Cd	48	12	2	1	4	C4	tetrahedron
HAXNOJ	Cd4	Cd	48	12	2	1	4	C4	tetrahedron
HAYDAM	Ni1	Ni	28	10	2	1	4	C4	square
HECKUW	Ni1	Ni	28	10	2	1	4	C4	square
HETRAZ	Au1	Au	79	11	1	1	2	C2	linear
HITPOQ	Mo1	Mo	42	6	4	1	6	C6	octahedron
HONLEC	Pt1	Pt	78	10	2	1	4	C4	square
HUHBUH	Ag1	Ag	47	11	1	1	2	C2	linear
HUHBUH	Ag2	Ag	47	11	1	1	2	C2	linear
HUHCES	Ag1	Ag	47	11	1	1	2	C2	linear
HUHCES	Ag2	Ag	47	11	1	1	2	C2	linear
ICIRER	Mo1	Mo	42	6	4	1	8	C8	trigonal dodecahedron
ICIRER01	Mo1	Mo	42	6	4	1	8	C8	trigonal dodecahedron
IDUGEV	Pt1	Pt	78	10	2	1	4	C4	square
IQAJIU	Fe1	Fe	26	8	3	1	6	C6	octahedron
ISEDUF	Ag1	Ag	47	11	1	1	2	C2	linear
ITANUM	Cu1	Cu	29	11	1	1	4	C2N2	tetrahedron
ITANUM	Cu2	Cu	29	11	1	1	4	C3N	tetrahedron
ITAPAU	Cu1	Cu	29	11	1	1	3	C2N	triangular
ITAPAU	Cu2	Cu	29	11	1	1	4	C2N2	tetrahedron
ITAPEY	Cu1	Cu	29	11	1	1	3	C2N	triangular
ITAPEY	Cu2	Cu	29	11	1	1	4	C2N2	tetrahedron
ITAPIC	Cu1	Cu	29	11	1	1	3	C2N	triangular
ITAPIC	Cu2	Cu	29	11	1	1	4	C2N2	tetrahedron
ITAPIC	Cu3	Cu	29	11	1	1	3	CN2	triangular
ITAPIC	Cu4	Cu	29	11	1	1	3	C2N	triangular
IWIPEK	Cu1	Cu	29	11	1	1	4	C2N2	tetrahedron
IWIPEK	Cu2	Cu	29	11	1	1	4	C4	tetrahedron
IWIPEK	Cu3	Cu	29	11	1	1	4	C4	tetrahedron
IWIPIO	Cu1	Cu	29	11	1	1	4	C3N	tetrahedron
IWIPIO	Cu2	Cu	29	11	1	1	3	C2N	triangular
IXUKIV	Cu1	Cu	29	11	1	1	3	N3	triangular
IXUKIV	Cu2	Cu	29	11	1	1	3	C3	triangular
JADYES	Co1	Co	27	9	3	1	6	C6	octahedron
JANMIV	Fe1	Fe	26	8	3	1	6	C6	octahedron
JEHBAA	V1	V	23	5	3	1	6	C6	octahedron
JEJFAF	Cu1	Cu	29	11	1	1	4	N4	tetrahedron
JEJFAF	Pt1	Pt	78	10	2	1	4	C4	square
JEYXAM	Au1	Au	79	11	1	1	2	C2	linear
JIHPAR01	Fe1	Fe	26	8	3	1	6	C6	octahedron
JIRZOZ	Cu1	Cu	29	11	1	1	3	CN2	triangular
JIRZOZ27	Cu1	Cu	29	11	1	1	3	C2N	triangular
JIRZOZ31	Cu1	Cu	29	11	1	1	3	C2N	triangular
JOGMOH	Ni1	Ni	28	10	2	1	4	C4	square
JOGMOH01	Ni1	Ni	28	10	2	1	4	C4	square
JOGMOH02	Ni1	Ni	28	10	2	1	4	C4	square
JOYVAU	Ag1	Ag	47	11	1	1	2	C2	linear
JOZWOK	Pt1	Pt	78	10	2	1	4	C4	square
JUTCUW	Cd1	Cd	48	12	2	1	4	C4	tetrahedron
KAFZOG	Fe1	Fe	26	8	3	1	6	C6	octahedron
KAFZOG	Fe2	Fe	26	8	3	1	6	C6	octahedron
KAGLAG	Ru1	Ru	44	8	3	1	6	C6	octahedron
KAHKIN	Mn1	Mn	25	7	3	1	6	C6	octahedron
KAHKUB	Fe1	Fe	26	8	3	1	6	C6	octahedron
KAHKUB02	Fe1	Fe	26	8	3	1	6	C6	octahedron
KAXSUY	Fe1	Fe	26	8	3	1	6	C6	octahedron
KEGZOL	Cu1	Cu	29	11	1	1	4	C4	tetrahedron
KEGZOL	Zn1	Zn	30	12	2	1	4	N4	tetrahedron
KEGZOL02	Cu1	Cu	29	11	1	1	4	C4	tetrahedron
KEGZOL02	Zn1	Zn	30	12	2	1	4	N4	tetrahedron
KEGZOL04	Cu1	Cu	29	11	1	1	4	C4	tetrahedron
KEGZOL04	Zn1	Zn	30	12	2	1	4	N4	tetrahedron
KEKXAA	Au1	Au	79	11	1	1	2	C2	linear
KEKXEE	Ag1	Ag	47	11	1	1	2	C2	linear
KOYJUD	Ag1	Ag	47	11	1	1	2	C2	linear
LAFCIG	Co1	Co	27	9	3	1	6	C6	octahedron
LAJFIL	Fe1	Fe	26	8	3	1	6	C6	octahedron
LAMMAO	Cr1	Cr	24	6	3	1	6	C6	octahedron
LAQPOJ	Fe1	Fe	26	8	3	1	6	C6	octahedron
LAQPOJ	Fe2	Fe	26	8	3	1	6	C6	octahedron
LAWXUE01	Mn1	Mn	25	7	2	1	6	N6	octahedron
LAWXUE01	Mn2	Mn	25	7	2	1	6	C6	octahedron
LAWYEP	Mn1	Mn	25	7	2	1	6	C6	octahedron
LAWYEP	Mn2	Mn	25	7	2	1	6	N6	octahedron
LEBXOF	Mo1	Mo	42	6	4	1	5	C4Mo	square pyramid
LECMEL	Co1	Co	27	9	3	1	6	C6	octahedron
LEHRIA	Fe1	Fe	26	8	2	1	6	C6	octahedron
LEHRIA	Fe2	Fe	26	8	2	1	6	C6	octahedron
LONYAO	Fe1	Fe	26	8	3	1	6	C6	octahedron
LONYAO	Fe2	Fe	26	8	3	1	6	C6	octahedron
LONYAO	Fe3	Fe	26	8	3	1	6	C6	octahedron
LORNEL	Cd1	Cd	48	12	2	1	4	C4	tetrahedron
LUPGIM	Fe1	Fe	26	8	2	1	6	C6	octahedron
LUQNOA	Fe1	Fe	26	8	3	1	6	C6	octahedron
LUQNUG	Fe1	Fe	26	8	3	1	6	C6	octahedron
LUYNAU	Cu1	Cu	29	11	1	1	3	N3	triangular
LUYNAU	Cu2	Cu	29	11	1	1	3	N3	triangular
LUYNAU	Cu3	Cu	29	11	1	1	3	N3	triangular
LUYNAU	Cu4	Cu	29	11	1	1	3	N3	triangular
MABZPT	Pt1	Pt	78	10	2	1	4	C4	square
MAVDES	Mo1	Mo	42	6	4	1	8	C8	square antiprism
MAVDIW	W1	W	74	6	4	1	8	C8	square antiprism
MEMBIQ	Fe1	Fe	26	8	3	1	6	C6	octahedron
MEMBOW	Co1	Co	27	9	3	1	6	C6	octahedron
METHGC	Hg1	Hg	80	12	2	1	2	C2	linear
MEWGIE	Fe1	Fe	26	8	3	1	6	C6	octahedron
MEWGIE	Fe2	Fe	26	8	3	1	6	C6	octahedron
MEXKEH	Co1	Co	27	9	3	1	6	C6	octahedron
MEXLUY	Mo1	Mo	42	6	5	1	8	C8	square antiprism
MILHEU	Fe1	Fe	26	8	3	1	6	C6	octahedron
MIMVUZ	Fe1	Fe	26	8	3	1	6	C6	octahedron
MIMWAG	Co1	Co	27	9	3	1	6	C6	octahedron
MIWWOE	Fe1	Fe	26	8	3	1	6	C6	octahedron
MODMIB	Cd1	Cd	48	12	2	1	6	N6	octahedron
MODMIB	Cd2	Cd	48	12	2	1	5	C3N2	trigonal bipyramid
MODMIB	Cd3	Cd	48	12	2	1	4	C4	tetrahedron
MODMOH	Cd1	Cd	48	12	2	1	6	N6	octahedron
MODMOH	Cd2	Cd	48	12	2	1	5	C3N2	trigonal bipyramid
MODMOH	Cd3	Cd	48	12	2	1	4	C4	tetrahedron
MODMUN	Cd1	Cd	48	12	2	1	6	N6	octahedron
MODMUN	Cd2	Cd	48	12	2	1	6	N6	octahedron
MODMUN	Cd3	Cd	48	12	2	1	5	C3N2	trigonal bipyramid
MODMUN	Cd4	Cd	48	12	2	1	4	C3N	tetrahedron
MODMUN	Cd5	Cd	48	12	2	1	4	C4	tetrahedron
MODNAU	Cd1	Cd	48	12	2	1	6	N6	octahedron
MODNAU	Cd2	Cd	48	12	2	1	4	C3N	tetrahedron
MODNAU	Cd3	Cd	48	12	2	1	4	C4	tetrahedron
MODNEY	Cd1	Cd	48	12	2	1	6	N6	octahedron
MODNEY	Cd2	Cd	48	12	2	1	4	C3N	tetrahedron
MODNEY	Cd3	Cd	48	12	2	1	4	C4	tetrahedron
MODNIC	Cd1	Cd	48	12	2	1	6	N6	octahedron
MODNIC	Cd2	Cd	48	12	2	1	4	C3N	tetrahedron
MODNIC	Cd3	Cd	48	12	2	1	4	C4	tetrahedron
MODPAW	Cd1	Cd	48	12	2	1	6	N6	octahedron
MODPAW	Cd2	Cd	48	12	2	1	5	C3N2	trigonal bipyramid
MODPAW	Cd3	Cd	48	12	2	1	4	C4	tetrahedron
MODPEA	Cd1	Cd	48	12	2	1	6	N6	octahedron
MODPEA	Cd2	Cd	48	12	2	1	5	C3N2	trigonal bipyramid
MODPEA	Cd3	Cd	48	12	2	1	4	C4	tetrahedron
MODPOK	Cd1	Cd	48	12	2	1	4	C4	tetrahedron
MODPOK	Cd2	Cd	48	12	2	1	6	C2N4	octahedron
MPYENC	Ni1	Ni	28	10	2	1	4	C4	square
MPYRET	Ni1	Ni	28	10	2	1	4	C4	square
MPYRNI	Ni1	Ni	28	10	2	1	4	C4	square
MUBXIR	W1	W	74	6	5	1	8	C8	square antiprism
MUBXIR	W2	W	74	6	5	1	8	C8	square antiprism
MUFXAN	Au1	Au	79	11	1	1	2	C2	linear
MUFXAN	Au2	Au	79	11	1	1	2	C2	linear
NAPHOC01	Fe1	Fe	26	8	3	1	6	C6	octahedron
NAPJAQ	Fe1	Fe	26	8	3	1	6	C6	octahedron
NAYWOZ	Ti1	Ti	22	4	3	1	6	C6	octahedron
NEGGOX	Mn1	Mn	25	7	2	1	4	CN3	tetrahedron
NEGGOX	Mn2	Mn	25	7	2	1	6	C6	octahedron
NEYYIZ	Cr1	Cr	24	6	3	1	6	C6	octahedron
NEYYOF	Cr1	Cr	24	6	3	1	6	C6	octahedron
NEYYOF	Tl1	Tl	81	13	1	1	0	N6	octahedron
NEYZAS	Fe1	Fe	26	8	3	1	6	C6	octahedron
NEYZAS	Tl1	Tl	81	13	1	1	0	N6	octahedron
NIKCOA	Fe1	Fe	26	8	3	1	6	C6	octahedron
NIXWEX	Pt1	Pt	78	10	2	1	4	C4	square
NOCLOG	Fe1	Fe	26	8	3	1	6	C6	octahedron
NOQROB	Pt1	Pt	78	10	2	1	4	C4	square
NUXXOT01	Fe1	Fe	26	8	3	1	6	C6	octahedron
OFATEV	Co1	Co	27	9	3	1	6	C6	octahedron
OFATEV02	Co1	Co	27	9	3	1	6	C6	octahedron
OFATIZ	Fe1	Fe	26	8	3	1	6	C6	octahedron
OFATIZ02	Fe1	Fe	26	8	3	1	6	C6	octahedron
OLACIN	Cu1	Cu	29	11	2	1	5	N5	square pyramid
OLACIN	W1	W	74	6	5	1	8	C8	square antiprism
OSINUA	Os1	Os	76	8	3	1	6	C6	octahedron
OSINUA	Os2	Os	76	8	3	1	6	C6	octahedron
OTEVUF	Au1	Au	79	11	3	1	4	C4	square
OTEWAM	Au1	Au	79	11	3	1	4	C4	square
OTEWEQ	Au1	Au	79	11	3	1	4	C4	square
OVIWUM	Cu1	Cu	29	11	1	1	4	C2N2	tetrahedron
OVIWUM	Cu2	Cu	29	11	1	1	4	C3N	tetrahedron
OVIXAT	Cu1	Cu	29	11	1	1	4	C2N2	tetrahedron
OVIXAT	Cu2	Cu	29	11	1	1	4	C3N	tetrahedron
OVUMAU	Fe1	Fe	26	8	2	1	6	C6	octahedron
OVUNUP	Pt1	Pt	78	10	2	1	4	C4	square
OYUKAV	Au1	Au	79	11	1	1	2	C2	linear
OYUKAV	Au2	Au	79	11	1	1	2	C2	linear
OYUKEZ	Au1	Au	79	11	1	1	2	C2	linear
PACCOL	Ni1	Ni	28	10	2	1	4	C4	square
PACCUR	Ni1	Ni	28	10	2	1	4	C4	square
PAHCUW	Pt1	Pt	78	10	2	1	4	C4	square
PAHCUW	Pt2	Pt	78	10	2	1	4	C4	square
PAHCUW	Pt3	Pt	78	10	2	1	4	C4	square
PAZHIJ	Fe1	Fe	26	8	3	1	6	C6	octahedron
PAZHUV	Fe1	Fe	26	8	3	1	6	C6	octahedron
PAZJEH	Fe1	Fe	26	8	3	1	6	C6	octahedron
PCAUPY	Au1	Au	79	11	1	1	2	C2	linear
PEBKIQ	Mn1	Mn	25	7	2	1	4	C4	tetrahedron
PECMOZ	W1	W	74	6	4	1	8	C8	square antiprism
PEQMOO	Co1	Co	27	9	3	1	6	C6	octahedron
PEQMUU	Cr1	Cr	24	6	3	1	6	C6	octahedron
PEQNAB	Fe1	Fe	26	8	3	1	6	C6	octahedron
PEQNIJ	Ni1	Ni	28	10	2	1	4	C4	square
PEQNOP	Pd1	Pd	46	10	2	1	4	C4	square
PEQNUV	Pt1	Pt	78	10	2	1	4	C4	square
PICYCO	Co1	Co	27	9	1	1	5	C5	square pyramid
PILFAR	Au1	Au	79	11	1	1	2	C2	linear
PIYZAZ	Cd1	Cd	48	12	2	1	4	C4	tetrahedron
PIYZED01	Cd1	Cd	48	12	2	1	4	C4	tetrahedron
POFSIN03	Cd1	Cd	48	12	2	1	4	C4	tetrahedron
POFSIN04	Cd1	Cd	48	12	2	1	4	C4	tetrahedron
PURLEU	Fe1	Fe	26	8	2	1	6	C6	octahedron
PURLEU	Fe2	Fe	26	8	2	1	6	C6	octahedron
PURLIY	Fe1	Fe	26	8	2	1	6	C6	octahedron
PURLOE	Fe1	Fe	26	8	2	1	6	C6	octahedron
PURLUK	Ru1	Ru	44	8	3	1	6	C6	octahedron
PURMAR	Fe1	Fe	26	8	2	1	6	C6	octahedron
PURMEV	Fe1	Fe	26	8	2	1	6	C6	octahedron
PUZHIC01	Fe1	Fe	26	8	3	1	6	C6	octahedron
PYCMOA	Mo1	Mo	42	6	4	1	8	C8	trigonal dodecahedron
QAGYEE	Fe1	Fe	26	8	3	1	6	C6	octahedron
QAGYEE	Fe2	Fe	26	8	3	1	6	C6	octahedron
QAQZUE	Au1	Au	79	11	3	1	4	C4	square
QEZXUO	Fe1	Fe	26	8	3	1	6	C6	octahedron
QEZYAV	Ru1	Ru	44	8	2	1	6	C6	octahedron
QIGMUO	Au1	Au	79	11	1	1	2	C2	linear
QOVNIZ	Ni1	Ni	28	10	2	1	4	C4	square
QOVNOF	Pd1	Pd	46	10	2	1	4	C4	square
QOVNUL	Pt1	Pt	78	10	2	1	4	C4	square
QOVPAT	Ni1	Ni	28	10	2	1	4	C4	square
QOVPEX	Pd1	Pd	46	10	2	1	4	C4	square
QOVPIB	Pt1	Pt	78	10	2	1	4	C4	square
QOWMIY	Au1	Au	79	11	1	1	2	C2	linear
QQQAAI01	Pt1	Pt	78	10	2	1	4	C4	square
RAKFEO	W1	W	74	6	4	1	8	C8	square antiprism
RECSAU	Au1	Au	79	11	1	1	2	C2	linear
RECSEY	Au1	Au	79	11	1	1	2	C2	linear
RECSOI	Fe1	Fe	26	8	3	1	6	C6	octahedron
RELSOS	Pt1	Pt	78	10	2	1	4	C4	square
REVYOG	Mn1	Mn	25	7	4	1	6	C6	octahedron
REYWIB	Au1	Au	79	11	1	1	2	C2	linear
REYWIB01	Au1	Au	79	11	1	1	2	C2	linear
RIFLEY	Fe1	Fe	26	8	2	1	6	C6	octahedron
RIFLUO	Fe1	Fe	26	8	2	1	6	C6	octahedron
RIFMAV	Fe1	Fe	26	8	2	1	6	C6	octahedron
RIFMEZ	Fe1	Fe	26	8	2	1	6	C6	octahedron
RIFMID	Fe1	Fe	26	8	3	1	6	C6	octahedron
RIGGIY	Hg1	Hg	80	12	2	1	2	C2	linear
RIGGIY	Hg2	Hg	80	12	2	1	2	C2	linear
ROMSIW	Au1	Au	79	11	1	1	2	C2	linear
ROMSIW	Au2	Au	79	11	1	1	2	C2	linear
ROMSIW	Au3	Au	79	11	1	1	2	C2	linear
ROMSIW	Au4	Au	79	11	1	1	2	C2	linear
ROMSIW	Au5	Au	79	11	1	1	2	C2	linear
RONWIA	Cu1	Cu	29	11	1	1	4	C4	tetrahedron
RONWIA	Cu2	Cu	29	11	1	1	4	C3N	tetrahedron
RONZID	Cd1	Cd	48	12	2	1	4	C2N2	tetrahedron
SADYAZ	Ag1	Ag	47	11	1	1	2	C3	linear
SAJRAW	Cd1	Cd	48	12	2	1	4	C4	tetrahedron
SAKNAU	Pt1	Pt	78	10	2	1	4	C4	square
SAKNEY	Pt1	Pt	78	10	2	1	4	C4	square
SAKNIC	Pt1	Pt	78	10	2	1	4	C4	square
SAPVAH	Ni1	Ni	28	10	2	1	4	C4	square
SAPVEL	Ni1	Ni	28	10	2	1	4	C4	square
SARSEK	Cr1	Cr	24	6	2	1	5	C5	square pyramid
SARSEK	Cr2	Cr	24	6	2	1	5	C5	square pyramid
SARSEK	Cr3	Cr	24	6	2	1	5	C4N	square pyramid
SARVEM	Fe1	Fe	26	8	3	1	6	C6	octahedron
SARVOW	Fe1	Fe	26	8	3	1	6	C6	octahedron
SARVOW	Fe2	Fe	26	8	3	1	6	C6	octahedron
SAZFAB	Ni1	Ni	28	10	2	1	4	C4	square
SEGFAM	Cr1	Cr	24	6	3	1	6	C6	octahedron
SEYRAP	Fe1	Fe	26	8	3	1	6	C6	octahedron
SILNAC	Au1	Au	79	11	1	1	2	C2	linear
SOCVEL	Au1	Au	79	11	1	1	2	C2	linear
SOCVEL	Au2	Au	79	11	1	1	2	C2	linear
SOCVOV	Au1	Au	79	11	1	1	2	C2	linear
SOCVOV	Au2	Au	79	11	1	1	2	C2	linear
SOCVOV	Au3	Au	79	11	1	1	2	C2	linear
SONVOH	Cr1	Cr	24	6	3	1	6	C6	octahedron
SONVUN	Cr1	Cr	24	6	3	1	6	C6	octahedron
SONWAU	Fe1	Fe	26	8	3	1	6	C6	octahedron
SONWEY	Fe1	Fe	26	8	3	1	6	C6	octahedron
SONWIC	Co1	Co	27	9	3	1	6	C6	octahedron
SONWOI	Co1	Co	27	9	3	1	6	C6	octahedron
SONWUO	Fe1	Fe	26	8	3	1	6	C6	octahedron
SONXAV	Co1	Co	27	9	3	1	6	C6	octahedron
SONXEZ	Cr1	Cr	24	6	3	1	6	C6	octahedron
SOYXAG	Fe1	Fe	26	8	3	1	6	C6	octahedron
SOYXEK	Co1	Co	27	9	3	1	6	C6	octahedron
SOYXIO	Cr1	Cr	24	6	3	1	6	C6	octahedron
SOZBIS10	Cd1	Cd	48	12	2	1	4	N4	tetrahedron
SUFGOP	Cd1	Cd	48	12	2	1	4	C4	tetrahedron
SUHDAB	Au1	Au	79	11	1	1	2	C2	linear
SUHDIJ	Au1	Au	79	11	1	1	2	C2	linear
SUKCEH	Fe1	Fe	26	8	2	1	6	C6	octahedron
TAFZUV	Au1	Au	79	11	1	1	2	C2	linear
TANBOZ	Cu1	Cu	29	11	1	1	3	C2N	triangular
TANBOZ	Cu2	Cu	29	11	1	1	3	CN2	triangular
TAXGIK	Au1	Au	79	11	1	1	2	C2	linear
TAXGUW	Au1	Au	79	11	1	1	2	C2	linear
TAYXOH	Au1	Au	79	11	1	1	2	C2	linear
TEAMOC	Mo1	Mo	42	6	4	1	8	C8	square antiprism
TILVAL	Cd1	Cd	48	12	2	1	4	C4	tetrahedron
TILVEP	Cd1	Cd	48	12	2	1	4	C4	tetrahedron
TILVIT	Cd1	Cd	48	12	2	1	4	C4	tetrahedron
TILVOZ	Cd1	Cd	48	12	2	1	4	C4	tetrahedron
TILVUF	Cd1	Cd	48	12	2	1	4	C4	tetrahedron
TILWAM	Cd1	Cd	48	12	2	1	4	C4	tetrahedron
TILWEQ	Cd1	Cd	48	12	2	1	4	C4	tetrahedron
TUZZOD	Au1	Au	79	11	1	1	2	C2	linear
UCACAC	Au1	Au	79	11	1	1	2	C2	linear
UDAXUS	Mo1	Mo	42	6	4	1	6	C6	octahedron
UFENEZ	Cu1	Cu	29	11	1	1	4	C3N	tetrahedron
UGUVEX	Cu1	Cu	29	11	1.5	1	3	C3	triangular
UHAYUY	Au1	Au	79	11	1	1	2	C2	linear
UJILAA	Cu1	Cu	29	11	1	1	3	C2N	triangular
UJILAA	Cu2	Cu	29	11	1	1	3	CN2	triangular
UJILAA	Cu3	Cu	29	11	1	1	3	N3	triangular
UJILAA	Cu4	Cu	29	11	1	1	3	C2N	triangular
UJILAA	Cu5	Cu	29	11	1	1	3	CN2	triangular
UJILAA	Cu6	Cu	29	11	1	1	3	C2N	triangular
UJILAA	Cu7	Cu	29	11	1	1	3	CN2	triangular
UJILAA	Cu8	Cu	29	11	1	1	3	C2N	triangular
UJILAA	Cu9	Cu	29	11	1	1	3	C2N	triangular
UJILAA	Cu10	Cu	29	11	1	1	3	CN2	triangular
UMIYIY	Au1	Au	79	11	1	1	2	C2	linear
UMIYIY	Au2	Au	79	11	1	1	2	C2	linear
UMIYOE	Au1	Au	79	11	1	1	2	C2	linear
UMIYUK	Au1	Au	79	11	1	1	2	C2	linear
UMIZAR	Au1	Au	79	11	1	1	2	C2	linear
UVEGAE	Au1	Au	79	11	1	1	2	C2	linear
VAJLOI	Fe1	Fe	26	8	3	1	6	C6	octahedron
VAJLOI	Fe2	Fe	26	8	3	1	6	C6	octahedron
VATZEV10	Pt1	Pt	78	10	2	1	4	C4	square
VATZEV10	Pt2	Pt	78	10	2	1	4	C4	square
VATZIZ	Pt1	Pt	78	10	2	1	4	C4	square
VATZOF	Pt1	Pt	78	10	2	1	4	C4	square
VATZOF01	Pt1	Pt	78	10	2	1	4	C4	square
VATZOF02	Pt1	Pt	78	10	2	1	4	C4	square
VATZOF03	Pt1	Pt	78	10	2	1	4	C4	square
VATZOF05	Pt1	Pt	78	10	2	1	4	C4	square
VATZOF06	Pt1	Pt	78	10	2	1	4	C4	square
VAZDIJ	Fe1	Fe	26	8	3	1	6	C6	octahedron
VAZDIJ	Fe2	Fe	26	8	3	1	6	C6	octahedron
VEFJIZ10	Ag1	Ag	47	11	1	1	3	C2N	triangular
VEKVEN	Pt1	Pt	78	10	2	1	4	C4	square
VEKVEN	Tl1	Tl	81	13	1	1	0	-	polyhedron
VIKSIS	Au1	Au	79	11	3	1	4	C4	square
VIKSIS01	Au1	Au	79	11	3	1	4	C4	square
VIKSIS02	Au1	Au	79	11	3	1	4	C4	square
VIKSOY	Au1	Au	79	11	3	1	4	C4	square
VIKSUE01	Au1	Au	79	11	3	1	4	C4	square
VIKTAL	Au1	Au	79	11	3	1	4	C4	square
VIKTAL01	Au1	Au	79	11	3	1	4	C4	square
VIXPUN	Hg1	Hg	80	12	2	1	2	C2	linear
VOJVUL	Mn1	Mn	25	7	3	1	6	C6	octahedron
VOJWAS	Co1	Co	27	9	3	1	6	C6	octahedron
VUJROH	Pt1	Pt	78	10	2	1	4	C4	square
VUJRUN	Pd1	Pd	46	10	2	1	4	C4	square
VUZDEZ	Au1	Au	79	11	3	1	4	C4	square
WAHNAV	Au1	Au	79	11	1	1	2	C2	linear
WAHNEZ	Au1	Au	79	11	1	1	2	C2	linear
WECXOS	Ag1	Ag	47	11	1	1	2	C2	linear
WECXOS	Ag2	Ag	47	11	1	1	2	C2	linear
WEGGAQ	Cu1	Cu	29	11	1	1	3	C2N	triangular
WEJZOA	Au1	Au	79	11	1	1	2	C2	linear
WEPWET	Au1	Au	79	11	1	1	2	C2	linear
WILWOD	Fe1	Fe	26	8	3	1	6	C6	octahedron
WIYTON	Co1	Co	27	9	3	1	6	C6	octahedron
WOPYOP	Ag1	Ag	47	11	1	1	3	C2N	triangular
WOPYUV	Ag1	Ag	47	11	1	1	2	C2	linear
WOPYUV01	Ag1	Ag	47	11	1	1	2	C2	linear
WUGRIZ	Cr1	Cr	24	6	3	1	6	C6	octahedron
WUGROF	Fe1	Fe	26	8	2	1	6	C6	octahedron
WUGRUL	Pd1	Pd	46	10	2	1	4	C4	square
WUGSAS	Pt1	Pt	78	10	2	1	4	C4	square
WUGSEW01	Ru1	Ru	44	8	2	1	6	C6	octahedron
WUGSIA	Ni1	Ni	28	10	2	1	4	C4	square
WUWLIJ	Re1	Re	75	7	4	1	7	C7	pentagonal bipyramid
WUWLIJ	Re2	Re	75	7	4	1	7	C7	pentagonal bipyramid
WUWLUV	Re1	Re	75	7	5	1	8	C8	square antiprism
XACNEV	Ni1	Ni	28	10	2	1	4	C4	square
XAGLIC	Fe1	Fe	26	8	3	1	6	C6	octahedron
XAGLOI	Fe1	Fe	26	8	3	1	6	C6	octahedron
XAMBOC	Cu1	Cu	29	11	1	1	3	CN2	triangular
XAMBOC	Cu2	Cu	29	11	1	1	2	CN	linear
XAMBOC	Cu3	Cu	29	11	1	1	3	C2N	triangular
XIGXAM	Mo1	Mo	42	6	3	1	6	C5N	octahedron
XILBEA	Fe1	Fe	26	8	2	1	6	C6	octahedron
XISCOS	Pt1	Pt	78	10	2	1	4	C4	square
XIXROL	Cu1	Cu	29	11	2	1	5	N5	square pyramid
XIXROL	W1	W	74	6	5	1	8	C8	square antiprism
XIZCOY	Au1	Au	79	11	3	1	4	C4	square
XOJPES	Cu1	Cu	29	11	1	1	3	C2N	triangular
XOZXUF	Ni1	Ni	28	10	2	1	4	C4	square
XOZYAM	Pt1	Pt	78	10	2	1	4	C4	square
XOZYEQ	Ni1	Ni	28	10	2	1	4	C4	square
XOZYIU	Pt1	Pt	78	10	2	1	4	C4	square
XOZYIU	Pt2	Pt	78	10	2	1	4	C4	square
XULBIP	Au1	Au	79	11	1	1	2	C2	linear
XUNBEN	Fe1	Fe	26	8	3	1	6	C6	octahedron
XUPFOD	Fe1	Fe	26	8	3	1	6	C6	octahedron
XUYYOG	Fe1	Fe	26	8	3	1	6	C6	octahedron
YACJIV	Cu1	Cu	29	11	1	1	3	C3	triangular
YACJIV	Cu2	Cu	29	11	1	1	3	C3	triangular
YARSOB	Cr1	Cr	24	6	3	1	6	C6	octahedron
YARSUH	Fe1	Fe	26	8	3	1	6	C6	octahedron
YARSUH	Fe2	Fe	26	8	3	1	6	C6	octahedron
YARTAO	Co1	Co	27	9	3	1	6	C6	octahedron
YARTES	Co1	Co	27	9	3	1	6	C6	octahedron
YARTES	Co2	Co	27	9	3	1	6	C6	octahedron
YARTIW	Cr1	Cr	24	6	3	1	6	C6	octahedron
YARTOC	Fe1	Fe	26	8	3	1	6	C6	octahedron
YARTUI	Co1	Co	27	9	3	1	6	C6	octahedron
YARVAQ	Cr1	Cr	24	6	3	1	6	C6	octahedron
YARVEU	Fe1	Fe	26	8	3	1	6	C6	octahedron
YARVIY	Co1	Co	27	9	3	1	6	C6	octahedron
YARVOE	Cr1	Cr	24	6	3	1	6	C6	octahedron
YARVUK	Fe1	Fe	26	8	3	1	6	C6	octahedron
YARWAR	Co1	Co	27	9	3	1	6	C6	octahedron
YASNUC	Pt1	Pt	78	10	4	1	6	C6	octahedron
YAWDOQ	Cd1	Cd	48	12	2	1	4	C4	tetrahedron
YAWDOQ	Cd2	Cd	48	12	2	1	6	N6	octahedron
YAWDOQ	Cd3	Cd	48	12	2	1	4	C4	tetrahedron
YAWDOQ	Cd4	Cd	48	12	2	1	6	N6	octahedron
YEBZAI	Au1	Au	79	11	3	1	4	C4	square
YEFNEC	Cd1	Cd	48	12	2	1	4	C4	tetrahedron
YEFNIG	Cd1	Cd	48	12	2	1	4	C4	tetrahedron
YEFNOM	Cd1	Cd	48	12	2	1	4	C4	tetrahedron
YEFPAA	Cd1	Cd	48	12	2	1	4	C4	tetrahedron
YEFPEE	Cd1	Cd	48	12	2	1	4	C4	tetrahedron
YEFPII	Cu1	Cu	29	11	1	1	4	C4	tetrahedron
YEFPII	Zn1	Zn	30	12	2	1	4	N4	tetrahedron
YEFPUU	Cu1	Cu	29	11	1	1	4	C4	tetrahedron
YEFPUU	Cd1	Cd	48	12	2	1	4	N4	tetrahedron
YINXUP	Au1	Au	79	11	3	1	4	C4	square
YINYAW	Au1	Au	79	11	3	1	4	C4	square
YINYEA	Au1	Au	79	11	3	1	4	C4	square
YINYIE	Au1	Au	79	11	3	1	4	C4	square
YIWLIZ	Cd1	Cd	48	12	2	1	6	N6	octahedron
YIWLIZ	Cd2	Cd	48	12	2	1	4	C4	tetrahedron
YIWLOF	Cd1	Cd	48	12	2	1	6	N6	octahedron
YIWLOF	Cd2	Cd	48	12	2	1	4	C4	tetrahedron
YIWLUL	Cd1	Cd	48	12	2	1	6	N6	octahedron
YIWLUL	Cd2	Cd	48	12	2	1	4	C4	tetrahedron
YIWLUL	Cd3	Cd	48	12	2	1	4	C4	tetrahedron
YIWMEW	Cd1	Cd	48	12	2	1	6	N6	octahedron
YIWMEW	Cd2	Cd	48	12	2	1	4	C4	tetrahedron
YIWMEW	Cd3	Cd	48	12	2	1	4	C4	tetrahedron
YIWMIA	Cd1	Cd	48	12	2	1	6	N6	octahedron
YIWMIA	Cd2	Cd	48	12	2	1	4	C4	tetrahedron
YIWMIA	Cd3	Cd	48	12	2	1	4	C4	tetrahedron
YIWMOG	Cd1	Cd	48	12	2	1	6	N6	octahedron
YIWMOG	Cd2	Cd	48	12	2	1	4	C4	tetrahedron
YIWMOG	Cd3	Cd	48	12	2	1	4	C4	tetrahedron
YIWMUM	Cd1	Cd	48	12	2	1	6	N6	octahedron
YIWMUM	Cd2	Cd	48	12	2	1	4	C4	tetrahedron
YIWMUM	Cd3	Cd	48	12	2	1	4	C4	tetrahedron
YIWNAT	Cd1	Cd	48	12	2	1	6	N6	octahedron
YIWNAT	Cd2	Cd	48	12	2	1	4	C4	tetrahedron
YIWNAT	Cd3	Cd	48	12	2	1	4	C4	tetrahedron
YIWNIB	Cd1	Cd	48	12	2	1	6	N6	octahedron
YIWNIB	Cd2	Cd	48	12	2	1	4	C4	tetrahedron
YIWNOH	Cd1	Cd	48	12	2	1	6	N6	octahedron
YIWNOH	Cd2	Cd	48	12	2	1	4	C4	tetrahedron
YIWNUN	Cd1	Cd	48	12	2	1	6	N6	octahedron
YIWNUN	Cd2	Cd	48	12	2	1	4	C4	tetrahedron
YIWPAV	Cd1	Cd	48	12	2	1	6	N6	octahedron
YIWPAV	Cd2	Cd	48	12	2	1	4	C4	tetrahedron
YIWPEZ	Cd1	Cd	48	12	2	1	6	N6	octahedron
YIWPEZ	Cd2	Cd	48	12	2	1	4	C4	tetrahedron
YIWPID	Cd1	Cd	48	12	2	1	6	N6	octahedron
YIWPID	Cd2	Cd	48	12	2	1	6	N6	octahedron
YIWPID	Cd3	Cd	48	12	2	1	4	C4	tetrahedron
YIWPID	Cd4	Cd	48	12	2	1	4	C4	tetrahedron
YIWPID	Cd5	Cd	48	12	2	1	4	C4	tetrahedron
YIWPID	Cd6	Cd	48	12	2	1	4	C4	tetrahedron
YOCKIL	Ag1	Ag	47	11	1	1	2	C2	linear
YOLGUB	Cu1	Cu	29	11	1	1	4	CN3	tetrahedron
YOLGUB	Cu2	Cu	29	11	1	1	3	C3	triangular
YOLGUB	Cu3	Cu	29	11	1	1	3	C3	triangular
YOLGUB	Cu4	Cu	29	11	1	1	4	CN3	tetrahedron
YOLGUB	Cu5	Cu	29	11	1	1	3	C2N	triangular
YOLGUB	Cu6	Cu	29	11	1	1	3	C2N	triangular
YOLGUB	Cu7	Cu	29	11	1	1	4	CN3	tetrahedron
YOLGUB	Cu8	Cu	29	11	1	1	3	C2N	triangular
YOLGUB	Cu9	Cu	29	11	1	1	3	C2N	triangular
YOTVAE	Ni1	Ni	28	10	2	1	4	C4	square
YOTVIM	Ni1	Ni	28	10	2	1	4	C4	square
YOTVOS	Ni1	Ni	28	10	2	1	4	C4	square
YOTVUY	Ni1	Ni	28	10	2	1	4	C4	square
ZAFXAF	Au1	Au	79	11	1	1	2	C2	linear
ZANPIP	Fe1	Fe	26	8	3	1	6	C6	octahedron
ZANPIP	Fe2	Fe	26	8	3	1	6	C6	octahedron
ZAPLUX	Pd1	Pd	46	10	2	1	4	C4	square
ZENZEX	Ag1	Ag	47	11	1	1	2	C2	linear
ZIGKIJ	Au1	Au	79	11	1	1	2	C2	linear
ZITRUP	Li1	Li	3	1	1	1	4	C4	tetrahedron
ZITRUP	Zn1	Zn	30	12	2	1	4	N4	tetrahedron
ZURRUZ	Ni1	Ni	28	10	2	1	4	C4	square
ZUSKON	Fe1	Fe	26	8	3	1	6	C6	octahedron
ZUSKUT	Co1	Co	27	9	3	1	6	C6	octahedron
ZUSLAA	Cr1	Cr	24	6	3	1	6	C6	octahedron
28656	Li1	Li	3	1	1	1	0	C12N12	cuboctahedron
28656	Li2	Li	3	1	1	1	0	C12N12	cuboctahedron
28656	Fe1	Fe	26	8	2	1	6	C6	octahedron
28656	Cu1	Cu	29	11	2	1	6	N6	octahedron
417823	Mn1	Mn	25	7	2	1	6	N6	octahedron
417823	Ru1	Ru	44	8	2	1	6	C6	octahedron
417825	Mn1	Mn	25	7	2	1	6	N6	octahedron
417825	Os1	Os	76	8	2	1	6	C6	octahedron
417826	Fe1	Fe	26	8	2	1	6	C6	octahedron
417826	Cd1	Cd	48	12	2	1	6	N6	octahedron
425667	Co1	Co	27	9	3	1	6	C6	octahedron
425667	Lu1	Lu	71	3	3	1	6	N6	trigonal prism
FEJJIN10	Co1	Co	27	9	3	1	6	C6	octahedron
FEJJIN10	Co2	Co	27	9	3	1	6	C6	octahedron
YIRZIJ	Au1	Au	79	11	3	1	4	C4	square
EJELUA	Ag1	Ag	47	11	1	1	2	C2	linear
ELONUO	Cr1	Cr	24	6	3	1	6	C6	octahedron
OSINOU	Ru1	Ru	44	8	3	1	6	C6	octahedron
YACXUW	Cd1	Cd	48	12	2	1	4	C4	tetrahedron
CYAN_288	Zn1	Zn	30	12	2	1	4	C4	tetrahedron
CYAN_288	Au1	Au	79	11	1	1	2	N2	linear
CYAN_290	Zn1	Zn	30	12	2	1	4	N4	tetrahedron
CYAN_290	Au1	Au	79	11	1	1	2	C2	linear
CYAN_290	Au2	Au	79	11	1	1	2	C2	linear
CYAN_290	Au3	Au	79	11	1	1	2	C2	linear
CYAN_289	Zn1	Zn	30	12	2	1	4	N4	tetrahedron
CYAN_289	Au1	Au	79	11	1	1	2	C2	linear
CYAN_289	Au2	Au	79	11	1	1	2	C2	linear
CYAN_289	Au3	Au	79	11	1	1	2	C2	linear

## Sheet: Table_S3 1D distributions
Me	Count	Freq_real		CCp	Count	Freq_real		Cn	Count	Freq_real		Cp	Count	Freq_real
Fe	206	16.721		C6	354	28.734		6	474	38.474		octahedron	470	38.149
Cu	159	12.906		C4	330	26.786		4	417	33.847		square	227	18.425
Cd	122	9.903		C2	185	15.016		2	199	16.153		linear	199	16.153
Pt	120	9.74		N6	116	9.416		3	84	6.818		tetrahedron	190	15.422
Au	118	9.578		N4	43	3.49		8	37	3.003		triangular	84	6.818
Ag	93	7.549		C8	37	3.003		5	13	1.055		square antiprism	27	2.192
Co	88	7.143		C2N	37	3.003		7	8	0.649		trigonal dodecahedron	10	0.812
Ni	71	5.763		CN2	19	1.542		Sum	1232	99.999		square pyramid	8	0.649
Mn	48	3.896		C3	18	1.461						pentagonal bipyramid	7	0.568
Zn	42	3.409		C3N	14	1.136						trigonal bipyramid	5	0.406
Cr	39	3.166		C2N2	13	1.055						trigonal prism	4	0.325
Mo	22	1.786		CN3	11	0.893						single-cap trigonal prism	1	0.081
Pd	21	1.705		N3	10	0.812						Sum	1232	100
W	19	1.542		CN	10	0.812
Hg	18	1.461		C7	8	0.649
Rh	8	0.649		C3Ni	6	0.487
Ru	8	0.649		C3N2	5	0.406
V	4	0.325		C5	4	0.325
Re	4	0.325		N2	3	0.244
Os	4	0.325		C5Co	2	0.162
Li	3	0.244		N5	2	0.162
Tl	2	0.162		N2C	1	0.081
Ir	2	0.162		C2N4	1	0.081
Nb	2	0.162		C4Mo	1	0.081
Be	1	0.081		C4N	1	0.081
Mg	1	0.081		C5N	1	0.081
Al	1	0.081		Sum	1232	99.999
Sn	1	0.081
Er	1	0.081
In	1	0.081
Ga	1	0.081
Ti	1	0.081
Lu	1	0.081
Sum	1232	100

## Sheet: Table_S4 Pairwise Corelation
Me - CN							Cn - Me							Me - Cp							Cp - Me							Me - CCp							CCp - Me							Cn - CCp							Cp - CCp
Me	Count	Occur.	Cn	Count	Occur.		Cn	Count	Occur.	Me	Count	Occur.		Me	Count	Occur.	Cp	Count	Occur.		Cp	Count	Occur.	Me	Count	Occur.		Me	Count	Occur.	CCp	Count	Occur.		CCp	Count	Occur.	Me	Count	Occur.		Cn	Count	Occur.	CCp	Count	Occur.		Cp
Fe	206	16.721	6	206	100		6	474	38.474	Fe	206	43.46		Fe	206	16.721	octahedron	205	99.515		octahedron	470	38.149	Fe	205	43.617		Fe	206	16.721	C6	198	96.117		C6	354	28.734	Fe	198	55.932		6	474	38.474	C6	354	74.684		octahedron
Pt	120	9.74	4	119	99.167					Co	79	16.667					trigonal prism	1	0.485					Co	79	16.809					N6	8	3.883					Co	68	19.209					N6	116	24.473
			6	1	0.833					Mn	43	9.072		Pt	120	9.74	square	119	99.167					Mn	43	9.149		Pt	120	9.74	C4	119	99.167					Cr	36	10.169					C5Co	2	0.422
Au	118	9.578	2	89	75.424					Cd	41	8.65					octahedron	1	0.833					Cd	41	8.723					C6	1	0.833					Mn	19	5.367					C2N4	1	0.211
			4	29	24.576					Cr	36	7.595		Au	118	9.578	linear	89	75.424					Cr	36	7.66		Au	118	9.578	C2	87	73.729					Rh	8	2.26					C5N	1	0.211
Ag	93	7.549	2	86	92.473					Ni	16	3.376					square	29	24.576					Ni	16	3.404					C4	29	24.576					Ru	8	2.26		4	417	33.847	C4	330	79.137		square
			3	5	5.376					Cu	15	3.165		Ag	93	7.549	linear	86	92.473					Cu	15	3.191					CN	1	0.847					Os	4	1.13					N4	43	10.312
			4	2	2.151					Rh	8	1.688					triangular	5	5.376					Rh	8	1.702					N2	1	0.847					V	2	0.565					C3N	14	3.357
Co	88	7.143	6	79	89.773					Ru	8	1.688					tetrahedron	2	2.151					Ru	8	1.702		Ag	93	7.549	C2	80	86.022					Mo	2	0.565					C2N2	13	3.118		linear
			4	5	5.682					Zn	4	0.844		Co	88	7.143	octahedron	79	89.773					Os	4	0.851					C2N	3	3.226					Al	1	0.282					CN3	11	2.638
			3	2	2.273					Os	4	0.844					tetrahedron	3	3.409					Zn	3	0.638					CN	3	3.226					Ir	1	0.282					C3Ni	6	1.439
			5	2	2.273					Mo	3	0.633					triangular	2	2.273					Mo	3	0.638					N4	2	2.151					In	1	0.282		2	199	16.153	C2	185	92.965
Cd	122	9.903	4	76	62.295					V	2	0.422					square	2	2.273					V	2	0.426					N2	2	2.151					Ga	1	0.282					CN	10	5.025		tetrahedron
			6	41	33.607					Al	1	0.211					square pyramid	2	2.273					Ga	1	0.213					N3	1	1.075					Cu	1	0.282					N2	3	1.508
			5	5	4.098					In	1	0.211		Cd	122	9.903	tetrahedron	76	62.295					Al	1	0.213					N2C	1	1.075					Zn	1	0.282					C3	1	0.503
Cu	159	12.906	3	74	46.541					Pd	1	0.211					octahedron	41	33.607					In	1	0.213					C3	1	1.075					Pd	1	0.282		8	37	3.003	C8	37	100
			4	55	34.591					Ir	1	0.211					trigonal bipyramid	5	4.098					Ir	1	0.213		Co	88	7.143	C6	68	77.273					Ti	1	0.282		3	84	6.818	C2N	37	44.048
			6	15	9.434					Er	1	0.211		Cu	159	12.906	triangular	74	46.541					Pd	1	0.213					N6	9	10.227					Pt	1	0.282					CN2	19	22.619		triangular
			2	13	8.176					Ti	1	0.211					tetrahedron	53	33.333					Ti	1	0.213					N4	3	3.409		C4	330	26.786	Pt	119	36.061					C3	17	20.238
			5	2	1.258					Ga	1	0.211					octahedron	15	9.434					Pt	1	0.213					C3	2	2.273					Cd	66	20					N3	10	11.905
Ni	71	5.763	4	55	77.465					Pt	1	0.211					linear	13	8.176		square	227	18.425	Pt	119	52.423					C4	2	2.273					Ni	49	14.848					N2C	1	1.19
			6	16	22.535					Lu	1	0.211					square	2	1.258					Ni	55	24.229					C5	2	2.273					Au	29	8.788		7	8	0.649	C7	8	100
Mn	48	3.896	6	43	89.583		4	417	33.847	Pt	119	28.537					square pyramid	2	1.258					Au	29	12.775					C5Co	2	2.273					Pd	20	6.061		5	13	1.055	C3N2	5	38.462		square antiprism
			4	5	10.417					Cd	76	18.225		Ni	71	5.763	square	55	77.465					Pd	20	8.811		Cd	122	9.903	C4	66	54.098					Cu	18	5.455					C5	4	30.769		trigonal dodecahedron
Zn	42	3.409	4	37	88.095					Cu	55	13.189					octahedron	16	22.535					Cu	2	0.881					N6	40	32.787					Zn	12	3.636					N5	2	15.385		pentagonal bipyramid
			6	4	9.524					Ni	55	13.189		Mn	48	3.896	octahedron	43	89.583					Co	2	0.881					N4	5	4.098					Hg	7	2.121					C4Mo	1	7.692		trigonal bipyramid
			3	1	2.381					Zn	37	8.873					tetrahedron	5	10.417		linear	199	16.153	Au	89	44.724					C3N2	5	4.098					Mn	3	0.909					C4N	1	7.692		square pyramid
Cr	39	3.166	6	36	92.308					Au	29	6.954		Zn	42	3.409	tetrahedron	37	88.095					Ag	86	43.216					C3N	4	3.279					Co	2	0.606			1232	99.999		1232
			5	3	7.692					Pd	20	4.796					octahedron	3	7.143					Cu	13	6.533					C2N4	1	0.82					Tl	2	0.606
Pd	21	1.705	4	20	95.238					Hg	7	1.679					triangular	1	2.381					Hg	11	5.528					C2N2	1	0.82					Be	1	0.303
			6	1	4.762					Co	5	1.199					trigonal prism	1	2.381		tetrahedron	190	15.422	Cd	76	40		Ni	71	5.763	C4	49	69.014					Mg	1	0.303									trigonal prism
W	19	1.542	8	19	100					Mn	5	1.199		Cr	39	3.166	octahedron	36	92.308					Cu	53	27.895					N6	16	22.535					Li	1	0.303
Mo	22	1.786	8	15	68.182					Li	3	0.719					square pyramid	3	7.692					Zn	37	19.474					C3Ni	6	8.451		C2	185	15.016	Au	87	47.027									single-cap trigonal prism
			7	3	13.636					Ag	2	0.48		Pd	21	1.705	square	20	95.238					Hg	7	3.684		Cr	39	3.166	C6	36	92.308					Ag	80	43.243					Sum
			6	3	13.636					Tl	2	0.48					octahedron	1	4.762					Mn	5	2.632					C5	2	5.128					Hg	11	5.946
			5	1	4.545					Mg	1	0.24		W	19	1.542	square antiprism	17	89.474					Li	3	1.579					C4N	1	2.564					Cu	7	3.784
Hg	18	1.461	2	11	61.111					Be	1	0.24					trigonal dodecahedron	2	10.526					Co	3	1.579		Cu	159	12.906	C2N	34	21.384		N6	116	9.416	Cd	40	34.483
			4	7	38.889		2	199	16.153	Au	89	44.724		Hg	18	1.461	linear	11	61.111					Ag	2	1.053					CN2	19	11.95					Mn	24	20.69
Rh	8	0.649	6	8	100					Ag	86	43.216					tetrahedron	7	38.889					Tl	2	1.053					C4	18	11.321					Ni	16	13.793
Ru	8	0.649	6	8	100					Cu	13	6.533		Mo	22	1.786	square antiprism	9	40.909					Be	1	0.526					N6	14	8.805					Cu	14	12.069
Os	4	0.325	6	4	100					Hg	11	5.528					trigonal dodecahedron	6	27.273					Mg	1	0.526					C3	14	8.805					Co	9	7.759
Re	4	0.325	7	3	75		3	84	6.818	Cu	74	88.095					octahedron	3	13.636		triangular	84	6.818	Cu	74	88.095					C2N2	12	7.547					Fe	8	6.897
			8	1	25					Ag	5	5.952					pentagonal bipyramid	2	9.091					Ag	5	5.952					C3N	10	6.289					Zn	3	2.586
Li	3	0.244	4	3	100					Co	2	2.381					single-cap trigonal prism	1	4.545					Co	2	2.381					CN3	8	5.031					Er	1	0.862
Nb	2	0.162	8	2	100					Zn	1	1.19					square pyramid	1	4.545					Zn	1	1.19					N4	7	4.403					Lu	1	0.862
V	4	0.325	7	2	50					Ir	1	1.19		Rh	8	0.649	octahedron	8	100					Sn	1	1.19					C2	7	4.403		C2N	37	3.003	Cu	34	91.892
			6	2	50					Sn	1	1.19		Ru	8	0.649	octahedron	8	100					Ir	1	1.19					N3	7	4.403					Ag	3	8.108
Tl	2	0.162	4	2	100		8	37	3.003	W	19	51.351		Os	4	0.325	octahedron	4	100		square antiprism	27	2.192	W	17	62.963					CN	6	3.774		N4	43	3.49	Zn	25	58.14
Mg	1	0.081	4	1	100					Mo	15	40.541		Li	3	0.244	tetrahedron	3	100					Mo	9	33.333					N5	2	1.258					Cu	7	16.279
Al	1	0.081	6	1	100					Nb	2	5.405		Re	4	0.325	pentagonal bipyramid	3	75					Re	1	3.704					C6	1	0.629					Cd	5	11.628
Ir	2	0.162	3	1	50					Re	1	2.703					square antiprism	1	25		trigonal dodecahedron	10	0.812	Mo	6	60		Zn	42	3.409	N4	25	59.524					Co	3	6.977
			6	1	50		5	13	1.055	Cd	5	38.462		V	4	0.325	pentagonal bipyramid	2	50					W	2	20					C4	12	28.571					Ag	2	4.651
In	1	0.081	6	1	100					Cr	3	23.077					octahedron	2	50					Nb	2	20					N6	3	7.143					Li	1	2.326
Er	1	0.081	6	1	100					Co	2	15.385		Tl	2	0.162	tetrahedron	2	100		trigonal bipyramid	5	0.406	Cd	5	100					C6	1	2.381		CN2	19	1.542	Cu	19	100
Sn	1	0.081	3	1	100					Cu	2	15.385		Nb	2	0.162	trigonal dodecahedron	2	100		pentagonal bipyramid	7	0.568	Re	3	42.857					N3	1	2.381		C8	37	3.003	W	19	51.351
Ti	1	0.081	6	1	100					Mo	1	7.692		Ga	1	0.081	octahedron	1	100					V	2	28.571		Mn	48	3.896	N6	24	50					Mo	15	40.541
Ga	1	0.081	6	1	100		7	8	0.649	Mo	3	37.5		Sn	1	0.081	triangular	1	100					Mo	2	28.571					C6	19	39.583					Nb	2	5.405
Be	1	0.081	4	1	100					Re	3	37.5		Be	1	0.081	tetrahedron	1	100		square pyramid	8	0.649	Cr	3	37.5					C4	3	6.25					Re	1	2.703
Lu	1	0.081	6	1	100					V	2	25		Ir	2	0.162	triangular	1	50					Co	2	25					CN3	2	4.167		C3	18	1.461	Cu	14	77.778
	1232	100		1232				1232	99.999		1232						octahedron	1	50					Cu	2	25		Pd	21	1.705	C4	20	95.238					Co	2	11.111
														Mg	1	0.081	tetrahedron	1	100					Mo	1	12.5					C6	1	4.762					Ir	1	5.556
														Al	1	0.081	octahedron	1	100		single-cap trigonal prism	1	0.081	Mo	1	100		W	19	1.542	C8	19	100					Ag	1	5.556
														In	1	0.081	octahedron	1	100		trigonal prism	4	0.325	Er	1	25		Mo	22	1.786	C8	15	68.182		C2N2	13	1.055	Cu	12	92.308
														Er	1	0.081	trigonal prism	1	100					Fe	1	25					C7	3	13.636					Cd	1	7.692
														Ti	1	0.081	octahedron	1	100					Zn	1	25					C6	2	9.091		C3N	14	1.136	Cu	10	71.429
														Lu	1	0.081	trigonal prism	1	100					Lu	1	25					C4Mo	1	4.545					Cd	4	28.571
															1232	100		1232				1232	100		1232						C5N	1	4.545		CN3	11	0.893	Cu	8	72.727
																												Hg	18	1.461	C2	11	61.111					Mn	2	18.182
																															C4	7	38.889					Li	1	9.091
																												Rh	8	0.649	C6	8	100		N3	10	0.812	Cu	7	70
																												Ru	8	0.649	C6	8	100					Sn	1	10
																												Os	4	0.325	C6	4	100					Ag	1	10
																												Re	4	0.325	C7	3	75					Zn	1	10
																															C8	1	25		C3Ni	6	0.487	Ni	6	100
																												V	4	0.325	C6	2	50		CN	10	0.812	Cu	6	60
																															C7	2	50					Ag	3	30
																												Nb	2	0.162	C8	2	100					Au	1	10
																												Tl	2	0.162	C4	2	100		C3N2	5	0.406	Cd	5	100
																												Al	1	0.081	C6	1	100		C7	8	0.649	Mo	3	37.5
																												Ir	2	0.162	C6	1	50					Re	3	37.5
																															C3	1	50					V	2	25
																												Sn	1	0.081	N3	1	100		N2	3	0.244	Ag	2	66.667
																												Li	3	0.244	CN3	1	33.333					Au	1	33.333
																															N4	1	33.333		C5	4	0.325	Co	2	50
																															C4	1	33.333					Cr	2	50
																												Er	1	0.081	N6	1	100		C5Co	2	0.162	Co	2	100
																												In	1	0.081	C6	1	100		N5	2	0.162	Cu	2	100
																												Ga	1	0.081	C6	1	100		N2C	1	0.081	Ag	1	100
																												Ti	1	0.081	C6	1	100		C4Mo	1	0.081	Mo	1	100
																												Be	1	0.081	C4	1	100		C2N4	1	0.081	Cd	1	100
																												Mg	1	0.081	C4	1	100		C4N	1	0.081	Cr	1	100
																												Lu	1	0.081	N6	1	100		C5N	1	0.081	Mo	1	100
																													1232	100		1232				1232	99.999		1232
[truncated: 11 more columns]

## Sheet: Table_S5 Me_OxS_Cn_CCp
Me	Count	Occur.	OxS	Count	Occur.	Cn	Count	Occur.	CCp	Count	Occur.
Fe	206	16.721	3	134	65.049	6	134	100	C6	128	95.522
									N6	6	4.478
			2	72	34.951	6	72	100	C6	70	97.222
									N6	2	2.778
Pt	120	9.74	2	119	99.167	4	119	100	C4	119	100
			4	1	0.833	6	1	100	C6	1	100
Au	118	9.578	1	89	75.424	2	89	100	C2	87	97.753
									CN	1	1.124
									N2	1	1.124
			3	29	24.576	4	29	100	C4	29	100
Ag	93	7.549	1	93	100	2	86	92.473	C2	80	93.023
									CN	3	3.488
									N2	2	2.326
									C3	1	1.163
						3	5	5.376	C2N	3	60
									N3	1	20
									N2C	1	20
						4	2	2.151	N4	2	100
Co	88	7.143	3	68	77.273	6	68	100	C6	67	98.529
									N6	1	1.471
			2	17	19.318	6	11	64.706	N6	8	72.727
									C5Co	2	18.182
									C6	1	9.091
						4	5	29.412	N4	3	60
									C4	2	40
						5	1	5.882	C5	1	100
			-1	2	2.273	3	2	100	C3	2	100
			1	1	1.136	5	1	100	C5	1	100
Cd	122	9.903	2	122	100	4	76	62.295	C4	66	86.842
									N4	5	6.579
									C3N	4	5.263
									C2N2	1	1.316
						6	41	33.607	N6	40	97.561
									C2N4	1	2.439
						5	5	4.098	C3N2	5	100
Ni	71	5.763	2	65	91.549	4	49	75.385	C4	49	100
						6	16	24.615	N6	16	100
			1	6	8.451	4	6	100	C3Ni	6	100
Cr	39	3.166	3	35	89.744	6	35	100	C6	35	100
			2	4	10.256	5	3	75	C5	2	66.667
									C4N	1	33.333
						6	1	25	C6	1	100
Cu	159	12.906	1	138	86.792	3	73	52.899	C2N	34	46.575
									CN2	19	26.027
									C3	13	17.808
									N3	7	9.589
						4	52	37.681	C4	17	32.692
									C2N2	12	23.077
									C3N	10	19.231
									CN3	8	15.385
									N4	5	9.615
						2	13	9.42	C2	7	53.846
									CN	6	46.154
			2	20	12.579	6	15	75	N6	14	93.333
									C6	1	6.667
						4	3	15	N4	2	66.667
									C4	1	33.333
						5	2	10	N5	2	100
			1.5	1	0.629	3	1	100	C3	1	100
Zn	42	3.409	2	42	100	4	37	88.095	N4	25	67.568
									C4	12	32.432
						6	4	9.524	N6	3	75
									C6	1	25
						3	1	2.381	N3	1	100
Mn	48	3.896	2	37	77.083	6	32	86.486	N6	23	71.875
									C6	9	28.125
						4	5	13.514	C4	3	60
									CN3	2	40
			3	10	20.833	6	10	100	C6	9	90
									N6	1	10
			4	1	2.083	6	1	100	C6	1	100
Pd	21	1.705	2	20	95.238	4	20	100	C4	20	100
			4	1	4.762	6	1	100	C6	1	100
W	19	1.542	4	11	57.895	8	11	100	C8	11	100
			5	8	42.105	8	8	100	C8	8	100
Hg	18	1.461	2	18	100	2	11	61.111	C2	11	100
						4	7	38.889	C4	7	100
Mo	22	1.786	4	13	59.091	8	10	76.923	C8	10	100
						6	2	15.385	C6	2	100
						5	1	7.692	C4Mo	1	100
			5	5	22.727	8	5	100	C8	5	100
			2	2	9.091	7	2	100	C7	2	100
			3	2	9.091	7	1	50	C7	1	100
						6	1	50	C5N	1	100
Rh	8	0.649	3	8	100	6	8	100	C6	8	100
Ru	8	0.649	2	5	62.5	6	5	100	C6	5	100
			3	3	37.5	6	3	100	C6	3	100
Tl	2	0.162	3	2	100	4	2	100	C4	2	100
Os	4	0.325	2	2	50	6	2	100	C6	2	100
			3	2	50	6	2	100	C6	2	100
V	4	0.325	3	3	75	7	2	66.667	C7	2	100
						6	1	33.333	C6	1	100
			1	1	25	6	1	100	C6	1	100
Re	4	0.325	4	2	50	7	2	100	C7	2	100
			3	1	25	7	1	100	C7	1	100
			5	1	25	8	1	100	C8	1	100
Nb	2	0.162	3	1	50	8	1	100	C8	1	100
			4	1	50	8	1	100	C8	1	100
Li	3	0.244	1	3	100	4	3	100	CN3	1	33.333
									N4	1	33.333
									C4	1	33.333
Ga	1	0.081	3	1	100	6	1	100	C6	1	100
Ir	2	0.162	-1	1	50	3	1	100	C3	1	100
			3	1	50	6	1	100	C6	1	100
Be	1	0.081	2	1	100	4	1	100	C4	1	100
Mg	1	0.081	2	1	100	4	1	100	C4	1	100
Al	1	0.081	3	1	100	6	1	100	C6	1	100
Sn	1	0.081	2	1	100	3	1	100	N3	1	100
In	1	0.081	3	1	100	6	1	100	C6	1	100
Er	1	0.081	3	1	100	6	1	100	N6	1	100
Ti	1	0.081	3	1	100	6	1	100	C6	1	100
Lu	1	0.081	3	1	100	6	1	100	N6	1	100
Sum	1232	100		1232			1232			1232

## Sheet: Table_S6 r_CF_UT
r	Count	Occur.	CF	Count	Occur.	Topological type	Count	Occur.
0D	543	66.954
6	206	37.937	A*M1)6	206	100	1,6M7-1	206	100
4	184	33.886	A*M1)4	183	99.457	1,4M5-1	183	100
			A)2*M1)8	1	0.543	1,5M10-1	1	100
2	98	18.048	A*M1)2	98	100	1,2M3-1	98	100
8	32	5.893	A*M1)8	32	100	1,8M9-1	32	100
7	7	1.289	A*M1)7	7	100	1,7M8-1	7	100
3	9	1.657	A*M1)3	4	44.444	1,3M4-1	4	100
			A)2*M1)6	5	55.556	1,4M5-1|1,2M3-1	3	60
						1,4M8-1	2	40
5	4	0.737	A*M1)5	2	50	1,5M6-1	2	100
			A)2*M1)10	2	50	1,6M12-1	2	100
4.5	1	0.184	A)2*B2*M1)8|A*M1)5	1	100	1,5M6-1|1,2,5M11-1	1	100
3.5	1	0.184	A)2*B2*M1)6	1	100	1,2,4M9-2	1	100
5.5	1	0.184	A)2*B2*M1)10	1	100	1,2,6M13-2	1	100
3D	211	26.017
3	87	41.232	A*B2)3	86	98.851	"pcu alpha-Po primitive cubic; 6/4/c1; sqc1"	84	97.674
						nia	2	2.326
			A*B2)2*M1	1	1.149	"pts PtS, Cooperite; sqc183"	1	100
2	53	25.118	A*B2)2	46	86.792	"dia Diamond; 4/6/c1; sqc6"	38	82.609
						"pts PtS, Cooperite; sqc183"	6	13.043
						"lon; 4/6/h2"	2	4.348
			A*B3)2	7	13.208	3,6,6T20	7	100
1.5	18	8.531	A)2*B2)3	10	55.556	"pcu alpha-Po primitive cubic; 6/4/c1; sqc1"	7	70
						"bcs; sqc4991"	1	10
						noe	1	10
						3,3,3,3,3T1	1	10
			A)2*B3)2*B2	2	11.111	fsc-3,4-Pbcn-1	2	100
			A)2*B3*B2)2	5	27.778	3,3,4T12	1	20
						3,3,4T20	1	20
						3,3,4T36	1	20
						3,3,4T72	1	20
						3,3,4T101	1	20
			A)4*B3*B2)5	1	5.556	3,3,3,3,4T11	1	100
2.4	12	5.687	A)5*B2)12	12	100	cor/corundum, Al2O3	7	58.333
						4,5,6T1	3	25
						4,5,6T2	2	16.667
2.33	21	9.953	A)3*B2)7	21	100	fsk	5	23.81
						xat	5	23.81
						4,6T52	3	14.286
						4,4,6T62	3	14.286
						fsh 4,6-conn	3	14.286
						fsn	1	4.762
						fsm	1	4.762
1.33	11	5.213	A)3*B2)4	11	100	"qtz Quartz; 4/6/h1"	4	36.364
						4,4T44	3	27.273
						"dia Diamond; 4/6/c1; sqc6"	2	18.182
						"mok; sev-4-Cccm"	1	9.091
						"ths ThSi2; 3/10/t4"	1	9.091
1.75	4	1.896	A)4*B3)2*B2)5	4	100	3,4,4T105	2	50
						3,3,4,4,4,4T10	1	25
						3,4,4T78	1	25
1	1	0.474	A*B4	1	100	"sra SrAl2 CeCu2 ABW; 4/4/o1"	1	100
2.25	1	0.474	A)4*B2)9	1	100	4,4,4,6T1	1	100
1.67	3	1.422	A)3*B3)2*B2)3	1	33.333	3,3,4,4,4T16	1	100
			A)3*B3*B2)4	1	33.333	3,3,4,4T80	1	100
			A)3*B2)5	1	33.333	3,3,3,3,3,3,4,4,4T2	1	100
2D	41	5.055
1.5	18	43.902	A)2*B2)3	18	100	"hcb; Shubnikov hexagonal plane net/(6,3)"	18	100
1.33	6	14.634	A)3*B2)4	6	100	"hcb; Shubnikov hexagonal plane net/(6,3)"	3	50
						sql/Shubnikov tetragonal plane net	3	50
2	6	14.634	A*B2)2	5	83.333	sql/Shubnikov tetragonal plane net	3	60
						"kgd; Shubnikov plane net (3.6.3.6)/dual"	2	40
			A*B2*M2	1	16.667	"hcb; Shubnikov hexagonal plane net/(6,3)"	1	100
4	4	9.756	A*B2)2*M1)2	2	50	sql/Shubnikov tetragonal plane net	2	100
			A)2*B2)5*M1)3	2	50	"SP 2-periodic net (4,4)Ia; SnS"	2	100
1.67	2	4.878	A)3*B2)4*M1	2	100	"hcb; Shubnikov hexagonal plane net/(6,3)"	2	100
2.67	2	4.878	A)3*B2)6*M1)2	2	100	"kgd; Shubnikov plane net (3.6.3.6)/dual"	2	100
3	2	4.878	A*B2)2*M1	2	100	sql/Shubnikov tetragonal plane net	2	100
1.25	1	2.439	A)4*B2)5	1	100	"hcb; Shubnikov hexagonal plane net/(6,3)"	1	100
1D	15	1.85
1	8	53.333	A*B2	8	100	2C1	8	100
2	6	40	A*B2*M1	6	100	2C1	5	83.333
						"fes; Shubnikov plane net (4.8^2)"	1	16.667
3	1	6.667	A*B2*M1)2	1	100	2C1	1	100
0D|2D	1	0.123
1.5	1	100	A)2*B2)2*M1	1	100	1,2M3-1|sql/Shubnikov tetragonal plane net	1	100
Sum	811	99.999		811			811

## Sheet: Table_S7 UT_CF
Topological type	Count	Occur.	CF	Count	Occur.
0D	543	66.954
1,6M7-1	206	37.937	A*M1)6	206	100
1,4M5-1	183	33.702	A*M1)4	183	100
1,2M3-1	98	18.048	A*M1)2	98	100
1,8M9-1	32	5.893	A*M1)8	32	100
1,7M8-1	7	1.289	A*M1)7	7	100
1,3M4-1	4	0.737	A*M1)3	4	100
1,4M5-1|1,2M3-1	3	0.552	A)2*M1)6	3	100
1,4M8-1	2	0.368	A)2*M1)6	2	100
1,5M6-1	2	0.368	A*M1)5	2	100
1,6M12-1	2	0.368	A)2*M1)10	2	100
1,5M10-1	1	0.184	A)2*M1)8	1	100
1,5M6-1|1,2,5M11-1	1	0.184	A)2*B2*M1)8|A*M1)5	1	100
1,2,4M9-2	1	0.184	A)2*B2*M1)6	1	100
1,2,6M13-2	1	0.184	A)2*B2*M1)10	1	100
3D	211	26.017
"pcu alpha-Po primitive cubic; 6/4/c1; sqc1"	91	43.128	A*B2)3	84	92.308
			A)2*B2)3	7	7.692
"dia Diamond; 4/6/c1; sqc6"	40	18.957	A*B2)2	38	95
			A)3*B2)4	2	5
3,6,6T20	7	3.318	A*B3)2	7	100
cor/corundum, Al2O3	7	3.318	A)5*B2)12	7	100
"pts PtS, Cooperite; sqc183"	7	3.318	A*B2)2	6	85.714
			A*B2)2*M1	1	14.286
fsk	5	2.37	A)3*B2)7	5	100
xat	5	2.37	A)3*B2)7	5	100
"qtz Quartz; 4/6/h1"	4	1.896	A)3*B2)4	4	100
4,4T44	3	1.422	A)3*B2)4	3	100
4,6T52	3	1.422	A)3*B2)7	3	100
4,5,6T1	3	1.422	A)5*B2)12	3	100
4,4,6T62	3	1.422	A)3*B2)7	3	100
fsh 4,6-conn	3	1.422	A)3*B2)7	3	100
nia	2	0.948	A*B2)3	2	100
fsc-3,4-Pbcn-1	2	0.948	A)2*B3)2*B2	2	100
"lon; 4/6/h2"	2	0.948	A*B2)2	2	100
4,5,6T2	2	0.948	A)5*B2)12	2	100
3,4,4T105	2	0.948	A)4*B3)2*B2)5	2	100
"mok; sev-4-Cccm"	1	0.474	A)3*B2)4	1	100
3,3,4T12	1	0.474	A)2*B3*B2)2	1	100
"bcs; sqc4991"	1	0.474	A)2*B2)3	1	100
fsn	1	0.474	A)3*B2)7	1	100
"sra SrAl2 CeCu2 ABW; 4/4/o1"	1	0.474	A*B4	1	100
4,4,4,6T1	1	0.474	A)4*B2)9	1	100
3,3,4T20	1	0.474	A)2*B3*B2)2	1	100
3,3,4T36	1	0.474	A)2*B3*B2)2	1	100
3,3,3,3,4T11	1	0.474	A)4*B3*B2)5	1	100
3,3,4,4,4T16	1	0.474	A)3*B3)2*B2)3	1	100
3,3,4T72	1	0.474	A)2*B3*B2)2	1	100
noe	1	0.474	A)2*B2)3	1	100
3,3,4,4,4,4T10	1	0.474	A)4*B3)2*B2)5	1	100
"ths ThSi2; 3/10/t4"	1	0.474	A)3*B2)4	1	100
3,3,4,4T80	1	0.474	A)3*B3*B2)4	1	100
3,3,4T101	1	0.474	A)2*B3*B2)2	1	100
3,4,4T78	1	0.474	A)4*B3)2*B2)5	1	100
3,3,3,3,3T1	1	0.474	A)2*B2)3	1	100
fsm	1	0.474	A)3*B2)7	1	100
3,3,3,3,3,3,4,4,4T2	1	0.474	A)3*B2)5	1	100
2D	41	5.055
"hcb; Shubnikov hexagonal plane net/(6,3)"	25	60.976	A)2*B2)3	18	72
			A)3*B2)4	3	12
			A)3*B2)4*M1	2	8
			A*B2*M2	1	4
			A)4*B2)5	1	4
sql/Shubnikov tetragonal plane net	10	24.39	A*B2)2	3	30
			A)3*B2)4	3	30
			A*B2)2*M1)2	2	20
			A*B2)2*M1	2	20
"kgd; Shubnikov plane net (3.6.3.6)/dual"	4	9.756	A)3*B2)6*M1)2	2	50
			A*B2)2	2	50
"SP 2-periodic net (4,4)Ia; SnS"	2	4.878	A)2*B2)5*M1)3	2	100
1D	15	1.85
2C1	14	93.333	A*B2	8	57.143
			A*B2*M1	5	35.714
			A*B2*M1)2	1	7.143
"fes; Shubnikov plane net (4.8^2)"	1	6.667	A*B2*M1	1	100
0D|2D	1	0.123
1,2M3-1|sql/Shubnikov tetragonal plane net	1	100	A)2*B2)2*M1	1	100
Sum	811			811

## Sheet: Table_S8 Me_r_Cn_CCp_Cp_CF_UT
Me	Count	Occur.	r	Count	Occur.	Cn	Count	Occur.	CCp	Count	Occur.	Cp	Count	Occur.	CF	Count	Occur.	Topological type	Count	Occur.
0D	543	66.954
|Fe|	114	20.994	6	114	100	|6|	114	100	|C6|	114	100	octahedron	114	100	A*M1)6	114	100	1,6M7-1	114	100
|Pt|	82	15.101	4	81	98.78	|4|	81	100	|C4|	81	100	square	81	100	A*M1)4	81	100	1,4M5-1	81	100
			6	1	1.22	|6|	1	100	|C6|	1	100	octahedron	1	100	A*M1)6	1	100	1,6M7-1	1	100
|Au|	81	14.917	2	52	64.198	|2|	52	100	|C2|	52	100	linear	52	100	A*M1)2	52	100	1,2M3-1	52	100
			4	29	35.802	|4|	29	100	|C4|	29	100	square	29	100	A*M1)4	29	100	1,4M5-1	29	100
|Co|	50	9.208	6	42	84	|6|	42	100	|C6|	42	100	octahedron	42	100	A*M1)6	42	100	1,6M7-1	42	100
			5	4	8	|6|	2	50	|C5Co|	2	100	octahedron	2	100	A)2*M1)10	2	100	1,6M12-1	2	100
						|5|	2	50	|C5|	2	100	square pyramid	2	100	A*M1)5	2	100	1,5M6-1	2	100
			3	2	4	|3|	2	100	|C3|	2	100	triangular	2	100	A*M1)3	2	100	1,3M4-1	2	100
			4	2	4	|4|	2	100	|C4|	2	100	square	2	100	A*M1)4	2	100	1,4M5-1	2	100
|Ni|	40	7.366	4	38	95	|4|	38	100	|C4|	38	100	square	38	100	A*M1)4	38	100	1,4M5-1	38	100
			3	2	5	|4|	2	100	|C3Ni|	2	100	square	2	100	A)2*M1)6	2	100	1,4M8-1	2	100
|Ag|	40	7.366	2	40	100	|2|	40	100	|C2|	37	92.5	linear	37	100	A*M1)2	37	100	1,2M3-1	37	100
									|CN|	1	2.5	linear	1	100	A*M1)2	1	100	1,2M3-1	1	100
									|C2|CN|	1	2.5	linear	1	100	A*M1)2	1	100	1,2M3-1	1	100
									|C3|	1	2.5	linear	1	100	A*M1)2	1	100	1,2M3-1	1	100
|Cr|	28	5.157	6	27	96.429	|6|	27	100	|C6|	27	100	octahedron	27	100	A*M1)6	27	100	1,6M7-1	27	100
			4.5	1	3.571	|5|	1	100	|C5|C4N|	1	100	square pyramid	1	100	A)2*B2*M1)8|A*M1)5	1	100	1,5M6-1|1,2,5M11-1	1	100
|Pd|	16	2.947	4	16	100	|4|	16	100	|C4|	16	100	square	16	100	A*M1)4	16	100	1,4M5-1	16	100
|W|	14	2.578	8	14	100	|8|	14	100	|C8|	14	100	square antiprism	12	85.714	A*M1)8	12	100	1,8M9-1	12	100
												trigonal dodecahedron	2	14.286	A*M1)8	2	100	1,8M9-1	2	100
|Mn|	11	2.026	6	9	81.818	|6|	9	100	|C6|	9	100	octahedron	9	100	A*M1)6	9	100	1,6M7-1	9	100
			4	2	18.182	|4|	2	100	|C4|	2	100	tetrahedron	2	100	A*M1)4	2	100	1,4M5-1	2	100
|Mo|	22	4.052	8	15	68.182	|8|	15	100	|C8|	15	100	square antiprism	9	60	A*M1)8	9	100	1,8M9-1	9	100
												trigonal dodecahedron	6	40	A*M1)8	6	100	1,8M9-1	6	100
			7	3	13.636	|7|	3	100	|C7|	3	100	pentagonal bipyramid	2	66.667	A*M1)7	2	100	1,7M8-1	2	100
												single-cap trigonal prism	1	33.333	A*M1)7	1	100	1,7M8-1	1	100
			6	2	9.091	|6|	2	100	|C6|	2	100	octahedron	2	100	A*M1)6	2	100	1,6M7-1	2	100
			4	1	4.545	|5|	1	100	|C4Mo|	1	100	square pyramid	1	100	A)2*M1)8	1	100	1,5M10-1	1	100
			5.5	1	4.545	|6|	1	100	|C5N|	1	100	octahedron	1	100	A)2*B2*M1)10	1	100	1,2,6M13-2	1	100
|Ru|	6	1.105	6	6	100	|6|	6	100	|C6|	6	100	octahedron	6	100	A*M1)6	6	100	1,6M7-1	6	100
|Hg|	11	2.026	4	6	54.545	|4|	6	100	|C4|	6	100	tetrahedron	6	100	A*M1)4	6	100	1,4M5-1	6	100
			2	5	45.455	|2|	5	100	|C2|	5	100	linear	5	100	A*M1)2	5	100	1,2M3-1	5	100
|Zn|	4	0.737	4	4	100	|4|	4	100	|C4|	4	100	tetrahedron	4	100	A*M1)4	4	100	1,4M5-1	4	100
|Cd|	3	0.552	4	2	66.667	|4|	2	100	|C4|	2	100	tetrahedron	2	100	A*M1)4	2	100	1,4M5-1	2	100
			3.5	1	33.333	|4|	1	100	|C4|	1	100	tetrahedron	1	100	A)2*B2*M1)6	1	100	1,2,4M9-2	1	100
|Tl|	2	0.368	4	2	100	|4|	2	100	|C4|	2	100	tetrahedron	2	100	A*M1)4	2	100	1,4M5-1	2	100
|Re|	3	0.552	7	2	66.667	|7|	2	100	|C7|	2	100	pentagonal bipyramid	2	100	A*M1)7	2	100	1,7M8-1	2	100
			8	1	33.333	|8|	1	100	|C8|	1	100	square antiprism	1	100	A*M1)8	1	100	1,8M9-1	1	100
|Nb|	2	0.368	8	2	100	|8|	2	100	|C8|	2	100	trigonal dodecahedron	2	100	A*M1)8	2	100	1,8M9-1	2	100
|V|	4	0.737	7	2	50	|7|	2	100	|C7|	2	100	pentagonal bipyramid	2	100	A*M1)7	2	100	1,7M8-1	2	100
			6	2	50	|6|	2	100	|C6|	2	100	octahedron	2	100	A*M1)6	2	100	1,6M7-1	2	100
|Cu|	3	0.552	4	1	33.333	|4|	1	100	|C4|	1	100	tetrahedron	1	100	A*M1)4	1	100	1,4M5-1	1	100
			2	1	33.333	|2|	1	100	|C2|	1	100	linear	1	100	A*M1)2	1	100	1,2M3-1	1	100
			3	1	33.333	|3|	1	100	|C3|	1	100	triangular	1	100	A*M1)3	1	100	1,3M4-1	1	100
|Pt|Hg|	1	0.184	3	1	100	|4|2|	1	100	|C4|C2|	1	100	square & linear	1	100	A)2*M1)6	1	100	1,4M5-1|1,2M3-1	1	100
|Pd|Hg|	1	0.184	3	1	100	|4|2|	1	100	|C4|C2|	1	100	square & linear	1	100	A)2*M1)6	1	100	1,4M5-1|1,2M3-1	1	100
|Ni|Hg|	1	0.184	3	1	100	|4|2|	1	100	|C4|C2|	1	100	square & linear	1	100	A)2*M1)6	1	100	1,4M5-1|1,2M3-1	1	100
|Rh|	1	0.184	6	1	100	|6|	1	100	|C6|	1	100	octahedron	1	100	A*M1)6	1	100	1,6M7-1	1	100
|Ir|	1	0.184	3	1	100	|3|	1	100	|C3|	1	100	triangular	1	100	A*M1)3	1	100	1,3M4-1	1	100
|Ti|	1	0.184	6	1	100	|6|	1	100	|C6|	1	100	octahedron	1	100	A*M1)6	1	100	1,6M7-1	1	100
|Os|	1	0.184	6	1	100	|6|	1	100	|C6|	1	100	octahedron	1	100	A*M1)6	1	100	1,6M7-1	1	100
3D	211	26.017
|Cd|	50	23.697	2	24	48	|4|	24	100	|C4|	20	83.333	tetrahedron	20	100	A*B2)2	20	100	"dia Diamond; 4/6/c1; sqc6"	19	95
																		"lon; 4/6/h2"	1	5
									|N4|	2	8.333	tetrahedron	2	100	A*B2)2	2	100	"dia Diamond; 4/6/c1; sqc6"	2	100
									|C4|N4|	1	4.167	tetrahedron	1	100	A*B2)2	1	100	"dia Diamond; 4/6/c1; sqc6"	1	100
									|C2N2|	1	4.167	tetrahedron	1	100	A*B2)2	1	100	"dia Diamond; 4/6/c1; sqc6"	1	100
			2.33	19	38	|6|4|	19	100	|N6|C4|	16	84.211	octahedron & tetrahedron	16	100	A)3*B2)7	16	100	fsk	5	31.25
																		xat	5	31.25
																		4,6T52	3	18.75
																		fsh 4,6-conn	2	12.5
																		fsm	1	6.25
									|N6|C3N|C4|	3	15.789	octahedron & tetrahedron	3	100	A)3*B2)7	3	100	4,4,6T62	3	100
			2.4	5	10	|6|5|4|	5	100	|N6|C3N2|C4|	4	80	octahedron & trigonal bipyramid & tetrahedron	4	100	A)5*B2)12	4	100	4,5,6T1	2	50
																		4,5,6T2	2	50
									|N6|C3N2|C3N|C4|	1	20	octahedron & trigonal bipyramid & tetrahedron	1	100	A)5*B2)12	1	100	4,5,6T1	1	100
			2.25	1	2	|6|4|	1	100	|N6|C4|	1	100	octahedron & tetrahedron	1	100	A)4*B2)9	1	100	4,4,4,6T1	1	100
			3	1	2	|4|6|	1	100	|C4|C2N4|	1	100	octahedron & tetrahedron	1	100	A*B2)2*M1	1	100	"pts PtS, Cooperite; sqc183"	1	100
|Fe|Cu|	11	5.213	3	11	100	|6|	11	100	|C6|N6|	11	100	octahedron	11	100	A*B2)3	11	100	"pcu alpha-Po primitive cubic; 6/4/c1; sqc1"	11	100
|Fe|Ni|	9	4.265	3	9	100	|6|	9	100	|C6|N6|	9	100	octahedron	9	100	A*B2)3	9	100	"pcu alpha-Po primitive cubic; 6/4/c1; sqc1"	9	100
|Fe|Zn|	8	3.791	2.4	6	75	|6|4|	6	100	|C6|N4|	6	100	octahedron & tetrahedron	6	100	A)5*B2)12	6	100	cor/corundum, Al2O3	6	100
			3	2	25	|6|	2	100	|C6|N6|	2	100	octahedron	1	100	A*B2)3	1	100	"pcu alpha-Po primitive cubic; 6/4/c1; sqc1"	1	100
												trigonal prism	1	100	A*B2)3	1	100	"pcu alpha-Po primitive cubic; 6/4/c1; sqc1"	1	100
|Mn|Fe|	7	3.318	3	6	85.714	|6|	6	100	|N6|C6|	5	83.333	octahedron	5	100	A*B2)3	5	100	"pcu alpha-Po primitive cubic; 6/4/c1; sqc1"	5	100
									|C6|	1	16.667	octahedron	1	100	A*B2)3	1	100	"pcu alpha-Po primitive cubic; 6/4/c1; sqc1"	1	100
			2	1	14.286	|6|	1	100	|N6|C6|	1	100	octahedron	1	100	A*B3)2	1	100	3,6,6T20	1	100
|Cu|Zn|	6	2.844	2	6	100	|4|	6	100	|C4|N4|	6	100	tetrahedron	6	100	A*B2)2	6	100	"dia Diamond; 4/6/c1; sqc6"	5	83.333
																		"lon; 4/6/h2"	1	16.667
|Fe|Co|	7	3.318	3	7	100	|6|	7	100	|C6|N6|	7	100	octahedron	5	100	A*B2)3	5	100	"pcu alpha-Po primitive cubic; 6/4/c1; sqc1"	5	100
												octahedron	2	100	A*B2)3	2	100	"pcu alpha-Po primitive cubic; 6/4/c1; sqc1"	2	100
|Cr|Mn|	4	1.896	3	4	100	|6|	4	100	|C6|N6|	4	100	octahedron	4	100	A*B2)3	4	100	"pcu alpha-Po primitive cubic; 6/4/c1; sqc1"	4	100
|Mn|Co|	3	1.422	3	3	100	|6|	3	100	|N6|C6|	3	100	octahedron	3	100	A*B2)3	3	100	"pcu alpha-Po primitive cubic; 6/4/c1; sqc1"	3	100
|Cr|	3	1.422	3	3	100	|6|	3	100	|C6|	3	100	octahedron	3	100	A*B2)3	3	100	"pcu alpha-Po primitive cubic; 6/4/c1; sqc1"	3	100
|Mn|	8	3.791	3	6	75	|6|	6	100	|C6|N6|	3	50	octahedron	3	100	A*B2)3	3	100	"pcu alpha-Po primitive cubic; 6/4/c1; sqc1"	3	100
									|N6|C6|	2	33.333	octahedron	2	100	A*B2)3	2	100	"pcu alpha-Po primitive cubic; 6/4/c1; sqc1"	2	100
									|C6|	1	16.667	octahedron	1	100	A*B2)3	1	100	"pcu alpha-Po primitive cubic; 6/4/c1; sqc1"	1	100
			2	1	12.5	|4|	1	100	|C4|	1	100	tetrahedron	1	100	A*B2)2	1	100	"dia Diamond; 4/6/c1; sqc6"	1	100
			2.33	1	12.5	|4|6|	1	100	|CN3|C6|	1	100	octahedron & tetrahedron	1	100	A)3*B2)7	1	100	fsh 4,6-conn	1	100
|Fe|	7	3.318	3	6	85.714	|6|	6	100	|C6|	3	50	octahedron	3	100	A*B2)3	3	100	"pcu alpha-Po primitive cubic; 6/4/c1; sqc1"	3	100
									|C6|N6|	3	50	octahedron	3	100	A*B2)3	3	100	"pcu alpha-Po primitive cubic; 6/4/c1; sqc1"	3	100
			2	1	14.286	|6|	1	100	|C6|	1	100	octahedron	1	100	A*B3)2	1	100	3,6,6T20	1	100
|Ni|Zn|	3	1.422	2	3	100	|4|	3	100	|C4|N4|	3	100	tetrahedron & square	3	100	A*B2)2	3	100	"pts PtS, Cooperite; sqc183"	3	100
|Fe|Cd|	4	1.896	3	3	75	|6|	3	100	|C6|N6|	3	100	octahedron	3	100	A*B2)3	3	100	"pcu alpha-Po primitive cubic; 6/4/c1; sqc1"	3	100
			2	1	25	|6|	1	100	|C6|N6|	1	100	octahedron	1	100	A*B3)2	1	100	3,6,6T20	1	100
|Co|Fe|Cu|	2	0.948	3	2	100	|6|	2	100	|C6|N6|	2	100	octahedron	2	100	A*B2)3	2	100	"pcu alpha-Po primitive cubic; 6/4/c1; sqc1"	2	100
|Zn|Au|	5	2.37	1.33	5	100	|4|2|	5	100	|N4|C2|	4	80	tetrahedron & linear	4	100	A)3*B2)4	4	100	"qtz Quartz; 4/6/h1"	2	50
																		"mok; sev-4-Cccm"	1	25
																		"dia Diamond; 4/6/c1; sqc6"	1	25
									|C4|N2|	1	20	tetrahedron & linear	1	100	A)3*B2)4	1	100	"dia Diamond; 4/6/c1; sqc6"	1	100
|Co|	4	1.896	3	4	100	|6|	4	100	|C6|N6|	2	50	octahedron	2	100	A*B2)3	2	100	"pcu alpha-Po primitive cubic; 6/4/c1; sqc1"	2	100
									|C6|	2	50	octahedron	2	100	A*B2)3	2	100	"pcu alpha-Po primitive cubic; 6/4/c1; sqc1"	2	100
|Ni|Au|	3	1.422	1.5	3	100	|6|2|	3	100	|N6|C2|	3	100	octahedron & linear	3	100	A)2*B2)3	3	100	"pcu alpha-Po primitive cubic; 6/4/c1; sqc1"	2	66.667
																		"bcs; sqc4991"	1	33.333
|Cu|Ag|	2	0.948	1.33	2	100	|4|2|	2	100	|C2N2|CN3|C2|	2	100	tetrahedron & linear	2	100	A)3*B2)4	2	100	4,4T44	2	100
|Cu|	19	9.005	1.75	4	21.053	|4|	4	100	|C2N2|C3N|	2	50	tetrahedron	2	100	A)4*B3)2*B2)5	2	100	3,4,4T105	2	100
									|CN3|C2N2|C4|C3N|	1	25	tetrahedron	1	100	A)4*B3)2*B2)5	1	100	3,3,4,4,4,4T10	1	100
									|C4|C3N|	1	25	tetrahedron	1	100	A)4*B3)2*B2)5	1	100	3,4,4T78	1	100
			1.33	1	5.263	|4|2|	1	100	|C2N2|N4|C2|CN|	1	100	tetrahedron & linear	1	100	A)3*B2)4	1	100	4,4T44	1	100
			1.67	3	15.789	|3|4|	1	33.333	|C3|C4|C3N|	1	100	tetrahedron & triangular	1	100	A)3*B3*B2)4	1	100	3,3,4,4T80	1	100
						|4|	1	33.333	|C2N2|C4|	1	100	tetrahedron	1	100	A)3*B3)2*B2)3	1	100	3,3,4,4,4T16	1	100
						|4|3|	1	33.333	|C3|CN3|C2N|	1	100	tetrahedron & triangular	1	100	A)3*B2)5	1	100	3,3,3,3,3,3,4,4,4T2	1	100
			1.5	10	52.632	|3|4|	4	40	|C3|C4|	1	25	tetrahedron & triangular	1	100	A)2*B3*B2)2	1	100	3,3,4T101	1	100
									|C2N|C2N2|	2	50	tetrahedron & triangular	2	100	A)2*B3*B2)2	2	100	3,3,4T20	1	50
																		3,3,4T36	1	50
									|C2N|C2N2|CN2|	1	25	tetrahedron & triangular	1	100	A)4*B3*B2)5	1	100	3,3,3,3,4T11	1	100
						|4|3|	2	20	|C4|N3|	1	50	tetrahedron & triangular	1	100	A)2*B3*B2)2	1	100	3,3,4T12	1	100
									|C3N|C2N|	1	50	tetrahedron & triangular	1	100	A)2*B3*B2)2	1	100	3,3,4T72	1	100
						|4|	2	20	|C2N2|C3N|	1	50	tetrahedron	1	100	A)2*B3)2*B2	1	100	fsc-3,4-Pbcn-1	1	100
									|C3N|	1	50	tetrahedron	1	100	A)2*B3)2*B2	1	100	fsc-3,4-Pbcn-1	1	100
						|3|	2	20	|N3|	1	50	triangular	1	100	A)2*B2)3	1	100	noe	1	100
									|C2N|CN2|N3|	1	50	triangular	1	100	A)2*B2)3	1	100	3,3,3,3,3T1	1	100
			2	1	5.263	|4|	1	100	|C3N|	1	100	tetrahedron	1	100	A*B2)2	1	100	"dia Diamond; 4/6/c1; sqc6"	1	100
|Mg|	1	0.474	2	1	100	|4|	1	100	|C4|	1	100	tetrahedron	1	100	A*B2)2	1	100	"dia Diamond; 4/6/c1; sqc6"	1	100
|Al|	1	0.474	3	1	100	|6|	1	100	|C6|	1	100	octahedron	1	100	A*B2)3	1	100	"pcu alpha-Po primitive cubic; 6/4/c1; sqc1"	1	100
|Co|Au|	2	0.948	1.33	1	50	|4|2|	1	100	|N4|C2|	1	100	tetrahedron & linear	1	100	A)3*B2)4	1	100	"qtz Quartz; 4/6/h1"	1	100
			1.5	1	50	|6|2|	1	100	|N6|C2|	1	100	octahedron & linear	1	100	A)2*B2)3	1	100	"pcu alpha-Po primitive cubic; 6/4/c1; sqc1"	1	100
|Ir|	1	0.474	3	1	100	|6|	1	100	|C6|	1	100	octahedron	1	100	A*B2)3	1	100	"pcu alpha-Po primitive cubic; 6/4/c1; sqc1"	1	100
|Co|Ni|	1	0.474	3	1	100	|6|	1	100	|C6|N6|	1	100	octahedron	1	100	A*B2)3	1	100	"pcu alpha-Po primitive cubic; 6/4/c1; sqc1"	1	100
|Co|Zn|	2	0.948	3	1	50	|6|	1	100	|C6|N6|	1	100	octahedron	1	100	A*B2)3	1	100	"pcu alpha-Po primitive cubic; 6/4/c1; sqc1"	1	100
			2.4	1	50	|6|4|	1	100	|C6|N4|	1	100	octahedron & tetrahedron	1	100	A)5*B2)12	1	100	cor/corundum, Al2O3	1	100
|Co|Cd|	1	0.474	3	1	100	|6|	1	100	|C6|N6|	1	100	octahedron	1	100	A*B2)3	1	100	"pcu alpha-Po primitive cubic; 6/4/c1; sqc1"	1	100
|Co|Er|	1	0.474	3	1	100	|6|	1	100	|C6|N6|	1	100	octahedron & trigonal prism	1	100	A*B2)3	1	100	nia	1	100
|Mn|Rh|	1	0.474	3	1	100	|6|	1	100	|N6|C6|	1	100	octahedron	1	100	A*B2)3	1	100	"pcu alpha-Po primitive cubic; 6/4/c1; sqc1"	1	100
|Fe|Ag|	1	0.474	1.5	1	100	|6|2|	1	100	|C6|N2|	1	100	octahedron & linear	1	100	A)2*B2)3	1	100	"pcu alpha-Po primitive cubic; 6/4/c1; sqc1"	1	100
|Fe|Rh|	1	0.474	3	1	100	|6|	1	100	|N6|C6|	1	100	octahedron	1	100	A*B2)3	1	100	"pcu alpha-Po primitive cubic; 6/4/c1; sqc1"	1	100
|Co|Rh|	1	0.474	3	1	100	|6|	1	100	|N6|C6|	1	100	octahedron	1	100	A*B2)3	1	100	"pcu alpha-Po primitive cubic; 6/4/c1; sqc1"	1	100
|Ni|Rh|	1	0.474	3	1	100	|6|	1	100	|N6|C6|	1	100	octahedron	1	100	A*B2)3	1	100	"pcu alpha-Po primitive cubic; 6/4/c1; sqc1"	1	100
|Cu|Rh|	1	0.474	3	1	100	|6|	1	100	|N6|C6|	1	100	octahedron	1	100	A*B2)3	1	100	"pcu alpha-Po primitive cubic; 6/4/c1; sqc1"	1	100
|Zn|Rh|	1	0.474	3	1	100	|6|	1	100	|N6|C6|	1	100	octahedron	1	100	A*B2)3	1	100	"pcu alpha-Po primitive cubic; 6/4/c1; sqc1"	1	100
|Ag|Zn|	1	0.474	1.33	1	100	|2|4|	1	100	|C2|N4|	1	100	tetrahedron & linear	1	100	A)3*B2)4	1	100	"qtz Quartz; 4/6/h1"	1	100
|Co|Cu|	1	0.474	3	1	100	|6|	1	100	|C6|N6|	1	100	octahedron	1	100	A*B2)3	1	100	"pcu alpha-Po primitive cubic; 6/4/c1; sqc1"	1	100
|Co|Fe|Ni|	1	0.474	3	1	100	|6|	1	100	|C6|N6|	1	100	octahedron	1	100	A*B2)3	1	100	"pcu alpha-Po primitive cubic; 6/4/c1; sqc1"	1	100
|Mn|Ag|	1	0.474	1.5	1	100	|6|2|	1	100	|N6|C2|	1	100	octahedron & linear	1	100	A)2*B2)3	1	100	"pcu alpha-Po primitive cubic; 6/4/c1; sqc1"	1	100
|Rh|Cd|	1	0.474	3	1	100	|6|	1	100	|C6|N6|	1	100	octahedron	1	100	A*B2)3	1	100	"pcu alpha-Po primitive cubic; 6/4/c1; sqc1"	1	100
|Zn|	2	0.948	2	2	100	|4|	2	100	|C4|	1	50	tetrahedron	1	100	A*B2)2	1	100	"dia Diamond; 4/6/c1; sqc6"	1	100
									|C4|N4|	1	50	tetrahedron	1	100	A*B2)2	1	100	"dia Diamond; 4/6/c1; sqc6"	1	100
|Zn|Cd|	1	0.474	2	1	100	|4|	1	100	|C4|	1	100	tetrahedron	1	100	A*B2)2	1	100	"dia Diamond; 4/6/c1; sqc6"	1	100
|Cd|Os|	1	0.474	2	1	100	|6|	1	100	|N6|C6|	1	100	octahedron	1	100	A*B3)2	1	100	3,6,6T20	1	100
|Ru|Cd|	1	0.474	2	1	100	|6|	1	100	|C6|N6|	1	100	octahedron	1	100	A*B3)2	1	100	3,6,6T20	1	100
|In|	1	0.474	3	1	100	|6|	1	100	|C6|	1	100	octahedron	1	100	A*B2)3	1	100	"pcu alpha-Po primitive cubic; 6/4/c1; sqc1"	1	100
|Cr|Ni|	1	0.474	3	1	100	|6|	1	100	|C6|N6|	1	100	octahedron	1	100	A*B2)3	1	100	"pcu alpha-Po primitive cubic; 6/4/c1; sqc1"	1	100
|Ag|	1	0.474	1.33	1	100	|3|2|	1	100	|N3|C2N|C2|	1	100	triangular & linear	1	100	A)3*B2)4	1	100	"ths ThSi2; 3/10/t4"	1	100
|Li|Hg|	1	0.474	2	1	100	|4|	1	100	|N4|C4|	1	100	tetrahedron	1	100	A*B2)2	1	100	"dia Diamond; 4/6/c1; sqc6"	1	100
|Zn|Pd|	1	0.474	2	1	100	|4|	1	100	|N4|C4|	1	100	tetrahedron & square	1	100	A*B2)2	1	100	"pts PtS, Cooperite; sqc183"	1	100
|Zn|Pt|	1	0.474	2	1	100	|4|	1	100	|N4|C4|	1	100	tetrahedron & square	1	100	A*B2)2	1	100	"pts PtS, Cooperite; sqc183"	1	100
|Cu|Cd|	2	0.948	2.33	1	50	|4|6|	1	100	|C4|N6|	1	100	octahedron & tetrahedron	1	100	A)3*B2)7	1	100	fsn	1	100
			2	1	50	|4|	1	100	|C4|N4|	1	100	tetrahedron	1	100	A*B2)2	1	100	"dia Diamond; 4/6/c1; sqc6"	1	100
|Ag|Cd|	1	0.474	1.5	1	100	|2|6|	1	100	|C2|N6|	1	100	octahedron & linear	1	100	A)2*B2)3	1	100	"pcu alpha-Po primitive cubic; 6/4/c1; sqc1"	1	100
|Li|	1	0.474	1	1	100	|4|	1	100	|CN3|	1	100	tetrahedron	1	100	A*B4	1	100	"sra SrAl2 CeCu2 ABW; 4/4/o1"	1	100
|Co|Ag|	1	0.474	1.5	1	100	|6|2|	1	100	|C6|N2|	1	100	octahedron & linear	1	100	A)2*B2)3	1	100	"pcu alpha-Po primitive cubic; 6/4/c1; sqc1"	1	100
|Cu|Pt|	1	0.474	2	1	100	|4|	1	100	|N4|C4|	1	100	tetrahedron & square	1	100	A*B2)2	1	100	"pts PtS, Cooperite; sqc183"	1	100
|Pd|Cd|	1	0.474	3	1	100	|6|	1	100	|C6|N6|	1	100	octahedron	1	100	A*B2)3	1	100	"pcu alpha-Po primitive cubic; 6/4/c1; sqc1"	1	100
|Ga|	1	0.474	3	1	100	|6|	1	100	|C6|	1	100	octahedron	1	100	A*B2)3	1	100	"pcu alpha-Po primitive cubic; 6/4/c1; sqc1"	1	100
|Be|	1	0.474	2	1	100	|4|	1	100	|C4|	1	100	tetrahedron	1	100	A*B2)2	1	100	"dia Diamond; 4/6/c1; sqc6"	1	100
|Li|Zn|	1	0.474	2	1	100	|4|	1	100	|C4|N4|	1	100	tetrahedron	1	100	A*B2)2	1	100	"dia Diamond; 4/6/c1; sqc6"	1	100
|Mn|Ru|	1	0.474	2	1	100	|6|	1	100	|N6|C6|	1	100	octahedron	1	100	A*B3)2	1	100	3,6,6T20	1	100
|Mn|Os|	1	0.474	2	1	100	|6|	1	100	|N6|C6|	1	100	octahedron	1	100	A*B3)2	1	100	3,6,6T20	1	100
|Co|Lu|	1	0.474	3	1	100	|6|	1	100	|C6|N6|	1	100	octahedron & trigonal prism	1	100	A*B2)3	1	100	nia	1	100
2D	41	5.055
|Cu|	23	56.098	1.5	17	73.913	|3|	17	100	|CN2|C2N|	6	35.294	triangular	6	100	A)2*B2)3	6	100	"hcb; Shubnikov hexagonal plane net/(6,3)"	6	100
									|C2N|	4	23.529	triangular	4	100	A)2*B2)3	4	100	"hcb; Shubnikov hexagonal plane net/(6,3)"	4	100
									|C2N|CN2|	3	17.647	triangular	3	100	A)2*B2)3	3	100	"hcb; Shubnikov hexagonal plane net/(6,3)"	3	100
									|C3|	2	11.765	triangular	2	100	A)2*B2)3	2	100	"hcb; Shubnikov hexagonal plane net/(6,3)"	2	100
									|N3|C3|	1	5.882	triangular	1	100	A)2*B2)3	1	100	"hcb; Shubnikov hexagonal plane net/(6,3)"	1	100
									|CN2|	1	5.882	triangular	1	100	A)2*B2)3	1	100	"hcb; Shubnikov hexagonal plane net/(6,3)"	1	100
			1.67	2	8.696	|3|	2	100	|CN2|C2N|	2	100	triangular	2	100	A)3*B2)4*M1	2	100	"hcb; Shubnikov hexagonal plane net/(6,3)"	2	100
			1.33	3	13.043	|2|3|	1	33.333	|C2|C2N|CN2|	1	100	triangular & linear	1	100	A)3*B2)4	1	100	"hcb; Shubnikov hexagonal plane net/(6,3)"	1	100
						|3|2|	2	66.667	|C3|C2|	1	50	triangular & linear	1	100	A)3*B2)4	1	100	"hcb; Shubnikov hexagonal plane net/(6,3)"	1	100
									|CN2|CN|C2N|	1	50	triangular & linear	1	100	A)3*B2)4	1	100	"hcb; Shubnikov hexagonal plane net/(6,3)"	1	100
			2	1	4.348	|4|	1	100	|C4|	1	100	tetrahedron	1	100	A*B2*M2	1	100	"hcb; Shubnikov hexagonal plane net/(6,3)"	1	100
|Cu|Ag|	3	7.317	1.33	3	100	|4|2|	3	100	|N4|C2|	3	100	tetrahedron & linear	3	100	A)3*B2)4	3	100	sql/Shubnikov tetragonal plane net	3	100
|Co|W|	2	4.878	4	2	100	|4|8|	2	100	|N4|C8|	2	100	square antiprism & tetrahedron	2	100	A*B2)2*M1)2	2	100	sql/Shubnikov tetragonal plane net	2	100
|Fe|Cu|	2	4.878	3	2	100	|6|4|	2	100	|C6|N4|	2	100	octahedron & square	2	100	A*B2)2*M1	2	100	sql/Shubnikov tetragonal plane net	2	100
|Cu|W|	2	4.878	4	2	100	|5|8|	2	100	|N5|C8|	2	100	square antiprism & square pyramid	2	100	A)2*B2)5*M1)3	2	100	"SP 2-periodic net (4,4)Ia; SnS"	2	100
|Pd|	1	2.439	2	1	100	|4|	1	100	|C4|	1	100	square	1	100	A*B2)2	1	100	sql/Shubnikov tetragonal plane net	1	100
|Pt|	1	2.439	2	1	100	|4|	1	100	|C4|	1	100	square	1	100	A*B2)2	1	100	sql/Shubnikov tetragonal plane net	1	100
|Fe|Zn|	1	2.439	2	1	100	|6|3|	1	100	|C6|N3|	1	100	octahedron & triangular	1	100	A*B2)2	1	100	"kgd; Shubnikov plane net (3.6.3.6)/dual"	1	100
|Fe|Sn|	1	2.439	2	1	100	|6|3|	1	100	|C6|N3|	1	100	octahedron & triangular	1	100	A*B2)2	1	100	"kgd; Shubnikov plane net (3.6.3.6)/dual"	1	100
|Ni|Cd|	1	2.439	2	1	100	|4|	1	100	|C4|N4|	1	100	tetrahedron & square	1	100	A*B2)2	1	100	sql/Shubnikov tetragonal plane net	1	100
|Ag|	2	4.878	1.25	1	50	|2|3|	1	100	|C2|N2C|	1	100	triangular & linear	1	100	A)4*B2)5	1	100	"hcb; Shubnikov hexagonal plane net/(6,3)"	1	100
			1.5	1	50	|3|	1	100	|C2N|	1	100	triangular	1	100	A)2*B2)3	1	100	"hcb; Shubnikov hexagonal plane net/(6,3)"	1	100
|Mn|	1	2.439	2.67	1	100	|4|6|	1	100	|CN3|C6|	1	100	octahedron & tetrahedron	1	100	A)3*B2)6*M1)2	1	100	"kgd; Shubnikov plane net (3.6.3.6)/dual"	1	100
|Cd|	1	2.439	2.67	1	100	|4|6|	1	100	|C4|N6|	1	100	octahedron & tetrahedron	1	100	A)3*B2)6*M1)2	1	100	"kgd; Shubnikov plane net (3.6.3.6)/dual"	1	100
1D	15	1.85
|Cu|	7	46.667	2	5	71.429	|3|	4	80	|C2N|	3	75	triangular	3	100	A*B2*M1	3	100	2C1	3	100
									|C3|	1	25	triangular	1	100	A*B2*M1	1	100	2C1	1	100
						|4|	1	20	|C3N|	1	100	tetrahedron	1	100	A*B2*M1	1	100	"fes; Shubnikov plane net (4.8^2)"	1	100
			1	2	28.571	|2|	2	100	|C2|	1	50	linear	1	100	A*B2	1	100	2C1	1	100
									|C2|CN|	1	50	linear	1	100	A*B2	1	100	2C1	1	100
|Au|	4	26.667	1	4	100	|2|	4	100	|C2|	3	75	linear	3	100	A*B2	3	100	2C1	3	100
									|CN|	1	25	linear	1	100	A*B2	1	100	2C1	1	100
|Ag|	3	20	1	2	66.667	|2|	2	100	|C2|	1	50	linear	1	100	A*B2	1	100	2C1	1	100
									|CN|	1	50	linear	1	100	A*B2	1	100	2C1	1	100
			2	1	33.333	|3|	1	100	|C2N|	1	100	triangular	1	100	A*B2*M1	1	100	2C1	1	100
|Zn|	1	6.667	3	1	100	|4|	1	100	|C4|	1	100	tetrahedron	1	100	A*B2*M1)2	1	100	2C1	1	100
0D|2D	1	0.123
|Ag|	1	100	1.5	1	100	|4|2|	1	100	|N4|C2|	1	100	tetrahedron & linear	1	100	A)2*B2)2*M1	1	100	1,2M3-1|sql/Shubnikov tetragonal plane net	1	100
Sum	811			811			811			811			811			811			811
